# Supplementary material for: Phase II proof-of-concept study of durvalumab and cediranib with and without olaparib in recurrent ovarian cancer
Source: Research Square preprint supplement (doi:10.21203/rs.3.rs-7724642/v1), 2025-10-05
Supplement: Supplementary file 1 [file 9b49c35486bcff2f437cb002.xlsx]

## Sheet: Table S1
Supplementary Table 1. Treatment related adverse events
D+O+C cohort (n = 39)	All grades	Grade 1/2	Grade 3	Grade 4		D+C cohort (n = 29)	All grades	Grade 1/2	Grade 3	Grade 4
Anemia	31 (79.5%)	21 (53.8%)	9 (23.1%)	1 (2.6%)		Diarrhea	17 (58.6%)	15 (51.7%)	2 (6.9%)	0
Fatigue	27 (69.2%)	21 (53.8%)	6 (15.4%)	0		Fatigue	15 (51.7%)	14 (48.3%)	1 (3.4%)	0
Nausea	27 (69.2%)	25 (64.1%)	2 (5.1%)	0		Hypertension	14 (48.3%)	10 (34.5%)	4 (13.8%)	0
Lymphocyte count decreased	25 (64.1%)	15 (38.5%)	9 (23.1%)	1 (2.6%)		Lymphocyte count decreased	14 (48.3%)	10 (34.5%)	4 (13.8%)	0
Platelet count decreased	23 (59.0%)	22 (56.4%)	0	1 (2.6%)		Anemia	9 (31.0%)	9 (31.0%)	0	0
Diarrhea	22 (56.4%)	22 (56.4%)	0	0		Nausea	8 (27.6%)	8 (27.6%)	0	0
Hypertension	21 (53.8%)	13 (33.3%)	8 (20.5%)	0		Hypothyroidism	7 (24.1%)	7 (24.1%)	0	0
Vomiting	19 (48.7%)	18 (46.2%)	1 (2.6%)	0		Headache	6 (20.7%)	6 (20.7%)	0	0
White blood cell decreased	18 (46.2%)	17 (43.6%)	1 (2.6%)	0		Proteinuria	5 (17.2%)	4 (13.8%)	1 (3.4%)	0
Anorexia	10 (25.6%)	10 (25.6%)	0	0		Vomiting	5 (17.2%)	5 (17.2%)	0	0
Creatinine increased	10 (25.6%)	10 (25.6%)	0	0		Weight loss	5 (17.2%)	5 (17.2%)	0	0
Dizziness	8 (20.5%)	8 (20.5%)	0	0		Anorexia	5 (17.2%)	5 (17.2%)	0	0
Headache	7 (17.9%)	7 (17.9%)	0	0		Dysgeusia	4 (13.8%)	4 (13.8%)	0	0
Abdominal pain	6 (15.4%)	5 (12.8%)	1 (2.6%)	0		Hyperthyroidism	4 (13.8%)	4 (13.8%)	0	0
Weight loss	6 (15.4%)	6 (15.4%)	0	0		Pruritus	4 (13.8%)	4 (13.8%)	0	0
Dyspepsia	6 (15.4%)	6 (15.4%)	0	0		White blood cell decreased	4 (13.8%)	4 (13.8%)	0	0
Hoarseness	5 (12.8%)	5 (12.8%)	0	0		Bloating	3 (10.3%)	3 (10.3%)	0	0
Hypokalemia	5 (12.8%)	5 (12.8%)	0	0		Dehydration	3 (10.3%)	3 (10.3%)	0	0
Neutrophil count decreased	5 (12.8%)	4 (10.3%)	0	1 (2.6%)		Hyponatremia	3 (10.3%)	3 (10.3%)	0	0
Dyspnea	5 (12.8%)	5 (12.8%)	0	0		Platelet count decreased	3 (10.3%)	3 (10.3%)	0	0
Dysgeusia	4 (10.3%)	4 (10.3%)	0	0		TSH elevated	3 (10.3%)	3 (10.3%)	0	0
Hypomagnesemia	4 (10.3%)	4 (10.3%)	0	0		Abdominal pain	3 (10.3%)	3 (10.3%)	0	0
Hypothyroidism	4 (10.3%)	4 (10.3%)	0	0
Proteinuria	4 (10.3%)	4 (10.3%)	0	0
TSH elevated	4 (10.3%)	4 (10.3%)	0	0
Notes: Adverse events occurring in at least 10% of patients are displayed. Events are listed in order of frequency (all grades).

## Sheet: Table S2
Supplmentary Table 2. GSEA analysis of NCB vs CB in D+O+C arm
contrast	geneScore	fdr_correction_mode	collection	pathway	pval	padj	ES	NES	nMoreExtreme	size	leadingEdge	size_leadingEdge	fraction_leadingEdge	inPathway	species
NCB-CB	_tstat	within each collection	H: hallmark gene sets	HALLMARK_G2M_CHECKPOINT	0.000306	0.00171297	0.515456	2.50186	0	192	ODF2,SLC12A2,STMN1,PRIM2,TRA2B,CENPF,NEK2,RASAL2,AMD1,HMGN2,KIF15,UBE2S,SMC4,LIG3,UCK2,EXO1,RPS6KA5,BIRC5,ABL1,POLQ,BARD1,SRSF2,PDS5B,TOP2A,KIF2C,AURKB,TRAIP,BRCA2,E2F2,SFPQ,NASP,PRC1,SNRPD1,BUB1,KPNA2,EZH2,SMARCC1,UBE2C,RACGAP1,TROAP,PTTG1,TPX2,MYBL2,CHAF1A,SMC2,CDC20,INCENP,ILF3,KIF23,PLK1,STAG1,TNPO2,TACC3,MKI67,PLK4,RAD54L,ODC1,MNAT1,H2AFV,POLE,KIF4A,TTK,CDC6,CBX1,CCNA2,E2F1,CCNB2,KIF11,CENPA…	113	0.588542	ABL1,AMD1,ARID4A,ATF5,ATRX,AURKA,AURKB,BARD1,BCL3,BIRC5,BRCA2,BUB1,BUB3,CASP8AP2,CBX1,CCNA2,CCNB2,CCND1,CCNF,CCNT1,CDC20,CDC25A,CDC25B,CDC27,CDC45,CDC6,CDC7,CDK1,CDK4,CDKN1B,CDKN2C,CDKN3,CENPA,CENPE,CENPF,CHAF1A,CHEK1,CHMP1A,CKS1B,CKS2,CTCF,CUL1,CUL3,CUL4A,CUL5,DBF4,DDX39A,DKC1,DMD,DR1,DTYMK,E2F1,E2F2,E2F3,E2F4,EFNA5,EGF,ESPL1,EWSR1,EXO1,EZH2,FANCC,FBXO5,FOXN3,G3BP1,GINS2,GSPT1,H2AFV,H2AFX,H2AFZ,…	Human
NCB-CB	_tstat	within each collection	H: hallmark gene sets	HALLMARK_E2F_TARGETS	0.000305	0.00171297	0.481837	2.34354	0	196	WDR90,STMN1,PRIM2,UBE2T,TRA2B,PSMC3IP,PRKDC,NUP107,UBE2S,MELK,GINS1,SMC4,CBX5,DIAPH3,SPAG5,GINS4,CCP110,BIRC5,KIF18B,E2F8,BARD1,MMS22L,RFC3,SRSF2,PDS5B,SNRPB,TOP2A,KIF2C,CDKN2A,AURKB,BRCA2,CDCA8,NASP,NCAPD2,RAD51AP1,RNASEH2A,POLD2,KPNA2,EZH2,DLGAP5,RACGAP1,PTTG1,MYBL2,SPC24,NAP1L1,CDC20,ILF3,DNMT1,PAN2,PLK1,STAG1,LUC7L3,TACC3,MKI67,PLK4,CIT,ASF1A,POLE,KIF4A,POLD1,TBRG4,DEPDC1,MCM4,CCNB2,RRM2,NOLC…	110	0.561224	AK2,ANP32E,ASF1A,ASF1B,ATAD2,AURKA,AURKB,BARD1,BIRC5,BRCA1,BRCA2,BRMS1L,BUB1B,CBX5,CCNB2,CCNE1,CCP110,CDC20,CDC25A,CDC25B,CDCA3,CDCA8,CDK1,CDK4,CDKN1A,CDKN1B,CDKN2A,CDKN2C,CDKN3,CENPE,CENPM,CHEK1,CHEK2,CIT,CKS1B,CKS2,CSE1L,CTCF,DCK,DCLRE1B,DCTPP1,DDX39A,DEK,DEPDC1,DIAPH3,DLGAP5,DNMT1,DONSON,DSCC1,DUT,E2F8,EED,EIF2S1,ESPL1,EXOSC8,EZH2,GINS1,GINS3,GINS4,GSPT1,H2AFX,H2AFZ,HELLS,HMGA1,HMGB2,HMGB3,HMM…	Human
NCB-CB	_tstat	within each collection	H: hallmark gene sets	HALLMARK_EPITHELIAL_MESENCHYMAL_TRANSITION	0.000305	0.00171297	0.432461	2.10122	0	193	FBN2,LAMC1,SFRP1,APLP1,FSTL1,COL7A1,ITGB1,WNT5A,PTX3,FBLN5,FMOD,QSOX1,FSTL3,TNFRSF12A,CXCL6,PLOD1,COPA,ELN,SERPINH1,SPOCK1,LAMA1,CRLF1,LOXL2,COL11A1,LOXL1,PLOD2,VIM,MSX1,CALU,SLIT2,COL4A2,EDIL3,COL4A1,COL5A1,CDH11,THBS2,GPX7,SERPINE1,LAMC2,GPC1,PFN2,JUN,INHBA,COL1A1,LAMA2,COMP,MAGEE1,MMP14,NTM,ITGA2,MEST,MYL9,ACTA2,FAP,THBS1,VCAN,SGCD,PRSS2,CTHRC1,TAGLN,AREG,COL3A1,FN1,SLC6A8,OXTR,LRP1,COL1A2,TPM…	77	0.398964	ABI3BP,ACTA2,ADAM12,ANPEP,APLP1,AREG,BASP1,BDNF,BGN,BMP1,CADM1,CALD1,CALU,CAP2,CAPG,CD44,CD59,CDH11,CDH2,CDH6,COL11A1,COL12A1,COL16A1,COL1A1,COL1A2,COL3A1,COL4A1,COL4A2,COL5A1,COL5A2,COL5A3,COL6A2,COL6A3,COL7A1,COL8A2,COMP,COPA,CRLF1,CTHRC1,CXCL1,CXCL12,CXCL6,DAB2,DCN,DPYSL3,DST,ECM1,ECM2,EDIL3,EFEMP2,ELN,EMP3,ENO2,FAP,FAS,FBLN1,FBLN2,FBLN5,FBN1,FBN2,FERMT2,FGF2,FLNA,FMOD,FN1,FOXC2,FSTL1,FSTL3,FU…	Human
NCB-CB	_tstat	within each collection	H: hallmark gene sets	HALLMARK_MITOTIC_SPINDLE	0.000304	0.00171297	0.383886	1.87147	0	198	PCM1,LLGL1,CENPJ,ARFIP2,CDK5RAP2,CENPF,SEPT9,NEK2,RHOT2,RASAL2,CNTRL,TBCD,KIF15,SMC4,HOOK3,CLASP1,ANLN,TSC1,WASF1,DLG1,ARHGDIA,RABGAP1,MYH10,BIRC5,ABL1,STK38L,CEP192,ECT2,FSCN1,CKAP5,TOP2A,KIF2C,EZR,BRCA2,ALMS1,CSNK1D,CYTH2,PRC1,ARL8A,BUB1,DLGAP5,SORBS2,RACGAP1,KLC1,TPX2,NF1,INCENP,KIF23,PLK1,KATNB1,FARP1,NEDD9,KIF4A,TTK,SPTAN1,CCNB2,CDC42EP4,KIF11,KNTC1,NDC80,BCAR1,KIF5B,KIFAP3,ESPL1,MAPRE1,AURK…	87	0.439394	ABI1,ABL1,ABR,ACTN4,AKAP13,ALMS1,ALS2,ANLN,APC,ARAP3,ARF6,ARFGEF1,ARFIP2,ARHGAP10,ARHGAP27,ARHGAP29,ARHGAP4,ARHGAP5,ARHGDIA,ARHGEF11,ARHGEF12,ARHGEF2,ARHGEF3,ARHGEF7,ARL8A,ATG4B,AURKA,BCAR1,BCL2L11,BCR,BIN1,BIRC5,BRCA2,BUB1,CAPZB,CCDC88A,CCNB2,CD2AP,CDC27,CDC42,CDC42BPA,CDC42EP1,CDC42EP2,CDC42EP4,CDK1,CDK5RAP2,CENPE,CENPF,CENPJ,CEP192,CEP250,CEP57,CEP72,CKAP5,CLASP1,CLIP1,CLIP2,CNTRL,CNTROB,CSNK1…	Human
NCB-CB	_tstat	within each collection	H: hallmark gene sets	HALLMARK_WNT_BETA_CATENIN_SIGNALING	0.00418994	0.0104749	0.479685	1.75871	11	39	NKD1,NCSTN,PTCH1,AXIN2,HDAC2,HDAC11,ADAM17,LEF1,DVL2,CSNK1E,NOTCH1,DLL1,NCOR2,CCND2	14	0.358974	ADAM17,AXIN1,AXIN2,CCND2,CSNK1E,CTNNB1,CUL1,DLL1,DVL2,FRAT1,FZD1,FZD8,GNAI1,HDAC11,HDAC2,HDAC5,HEY1,HEY2,JAG1,JAG2,KAT2A,LEF1,MAML1,MYC,NCOR2,NCSTN,NKD1,NOTCH1,NOTCH4,NUMB,PPARD,PSEN2,PTCH1,RBPJ,SKP2,TCF7,TP53,WNT5B,WNT6	Human
NCB-CB	_tstat	within each collection	H: hallmark gene sets	HALLMARK_MYC_TARGETS_V2	0.0103471	0.024636	0.392281	1.57252	30	58	RRP12,IPO4,UTP20,PLK1,PLK4,SLC29A2,TBRG4,NOP2,MCM4,MYBBP1A,FARSA,NOLC1,NOP56,PPRC1,CBX3,HK2,GNL3,DUSP2,DDX18,PA2G4,PPAN,GRWD1,MPHOSPH10,NOC4L,EXOSC5,MRTO4,CDK4,HSPD1,BYSL,IMP4,PRMT3,AIMP2,TMEM97,TCOF1	34	0.586207	AIMP2,BYSL,CBX3,CDK4,DCTPP1,DDX18,DUSP2,EXOSC5,FARSA,GNL3,GRWD1,HK2,HSPD1,HSPE1,IMP4,IPO4,LAS1L,MAP3K6,MCM4,MCM5,MPHOSPH10,MRTO4,MYBBP1A,MYC,NDUFAF4,NIP7,NOC4L,NOLC1,NOP16,NOP2,NOP56,NPM1,PA2G4,PES1,PHB,PLK1,PLK4,PPAN,PPRC1,PRMT3,PUS1,RABEPK,RCL1,RRP12,RRP9,SLC19A1,SLC29A2,SORD,SRM,SUPV3L1,TBRG4,TCOF1,TFB2M,TMEM97,UNG,UTP20,WDR43,WDR74	Human
NCB-CB	_tstat	within each collection	H: hallmark gene sets	HALLMARK_KRAS_SIGNALING_UP	0.0192196	0.0436808	-0.258557	-1.33876	32	190	PSMB8,SCN1B,ACE,TRIB1,IL1RL2,LAT2,C3AR1,MAP4K1,HKDC1,FBXO4,BIRC3,PDCD1LG2,G0S2,LY96,GYPC,USP12,IRF8,CLEC4A,FCER1G,CTSS,MTMR10,CD37,STRN,GLRX,CMKLR1,IL33,ITGB2,SATB1,DOCK2,ETS1,LAPTM5,TNFRSF1B,HOXD11,LCP1,IKZF1,IL1B,TLR8,CSF2RA,IL10RA,DNMBP,IL2RG,PTPRR,ABCB1,SCG3,ZNF277,ADAM8,CPE,EVI5,CROT,ALDH1A3,FUCA1,FLT4,SNAP91,PTCD2,MAFB,ANKH,EPB41L3,TNFAIP3,AKAP12,IL7R,CXCL10,ANO1,GPRC5B,USH1C,SNAP25,NIN,TRA…	69	0.363158	ABCB1,ACE,ADAM17,ADAM8,ADAMDEC1,AKAP12,AKT2,ALDH1A2,ALDH1A3,AMMECR1,ANGPTL4,ANKH,ANO1,ANXA10,APOD,ARG1,ATG10,AVL9,BIRC3,BMP2,BPGM,BTBD3,BTC,C3AR1,CA2,CAB39L,CBL,CBR4,CBX8,CCL20,CCND2,CD37,CDADC1,CFB,CFH,CFHR2,CLEC4A,CMKLR1,CPE,CROT,CSF2RA,CTSS,CXCL10,CXCR4,DCBLD2,DNMBP,DOCK2,DUSP6,EMP1,ENG,EPB41L3,EPHB2,EREG,ETS1,ETV1,ETV4,ETV5,EVI5,F13A1,F2RL1,FBXO4,FCER1G,FGF9,FLT4,FUCA1,G0S2,GABRA3,GADD45G,GAL…	Human
NCB-CB	_tstat	within each collection	H: hallmark gene sets	HALLMARK_TNFA_SIGNALING_VIA_NFKB	0.00348635	0.00917459	-0.281378	-1.45975	5	193	NFKB1,IL15RA,TRIB1,IRF1,TNIP1,BIRC3,TAP1,CD69,CSF1,G0S2,EHD1,SMAD3,PLEK,STAT5A,RNF19B,GADD45A,PDLIM5,TNFAIP8,SGK1,DRAM1,CD80,RIPK2,CXCL11,ABCA1,CCRL2,TLR2,IFIT2,IL1B,IFIH1,BCL3,IL18,SOD2,BCL2A1,NINJ1,IER3,FUT4,CCL4,KYNU,TNFRSF9,GCH1,GPR183,DUSP5,SDC4,NFKBIE,NFKBIA,CCL5,SQSTM1,ZFP36,CEBPD,RELA,IL23A,ZBTB10,ZC3H12A,EGR1,TNFAIP3,RELB,TNF,PTGER4,IL7R,CXCL10,CFLAR,GADD45B,F3,MSC,TRAF1,NAMPT,IER5,TNFSF…	76	0.393782	ABCA1,AREG,ATF3,ATP2B1,B4GALT1,B4GALT5,BCL2A1,BCL3,BCL6,BHLHE40,BIRC2,BIRC3,BMP2,BTG1,BTG2,BTG3,CCL2,CCL20,CCL4,CCL5,CCND1,CCNL1,CCRL2,CD44,CD69,CD80,CD83,CDKN1A,CEBPB,CEBPD,CFLAR,CLCF1,CSF1,CXCL1,CXCL10,CXCL11,CXCL2,CXCL3,CXCL6,DDX58,DENND5A,DNAJB4,DRAM1,DUSP1,DUSP2,DUSP4,DUSP5,EDN1,EFNA1,EGR1,EGR2,EGR3,EHD1,EIF1,ETS2,F2RL1,F3,FJX1,FOS,FOSB,FOSL1,FOSL2,FUT4,G0S2,GADD45A,GADD45B,GCH1,GEM,GFPT2,GP…	Human
NCB-CB	_tstat	within each collection	H: hallmark gene sets	HALLMARK_PEROXISOME	0.00212992	0.00591646	-0.332599	-1.55866	3	102	HSD3B7,SIAH1,IDE,SLC25A4,STS,ACSL5,ABCD1,MVP,SOD2,SCP2,CRAT,CLN6,ABCD2,SOD1,ABCB1,CDK7,RXRG,GSTK1,SULT2B1,DHRS3,HSD17B11,PABPC1,SCGB1A1,IDH1,RETSAT,ECI2,ABCB4,FABP6,PEX13,ALDH9A1,ACAA1,NUDT19,ACSL4,MLYCD,ECH1,PRDX1,HSD17B4,ISOC1,YWHAH,LONP2,PEX2,ATXN1,HMGCL,IDI1,SLC25A19,EPHX2,NR1I2,SLC25A17,ABCD3	49	0.480392	ABCB1,ABCB4,ABCB9,ABCC5,ABCD1,ABCD2,ABCD3,ACAA1,ACOT8,ACOX1,ACSL1,ACSL4,ACSL5,ALB,ALDH1A1,ALDH9A1,ATXN1,BCL10,CACNA1B,CADM1,CAT,CDK7,CEL,CLN6,CLN8,CNBP,CRABP1,CRABP2,CRAT,CTBP1,DHCR24,DHRS3,DIO1,DLG4,ECH1,ECI2,EHHADH,ELOVL5,EPHX2,ERCC1,ERCC3,ESR2,FABP6,FADS1,FDPS,FIS1,GNPAT,GSTK1,HAO2,HMGCL,HRAS,HSD11B2,HSD17B11,HSD17B4,HSD3B7,IDE,IDH1,IDH2,IDI1,ISOC1,ITGB1BP1,LONP2,MLYCD,MSH2,MVP,NR1I2,NUDT19,PA…	Human
NCB-CB	_tstat	within each collection	H: hallmark gene sets	HALLMARK_XENOBIOTIC_METABOLISM	0.000581	0.00171297	-0.303782	-1.57598	0	193	PSMB10,UPP1,SLC6A12,COMT,CBR1,HPRT1,IRF8,MCCC2,PDLIM5,GSTO1,UGDH,CYP2S1,ARPP19,SAR1B,DHRS7,GCNT2,FBP1,NINJ1,EPHX1,PTGDS,PTGR1,KYNU,CD36,PAPSS2,ABCD2,TNFRSF1A,CYP17A1,PINK1,GCH1,SLC46A3,SLC35D1,ASL,HMOX1,PDK4,CROT,PMM1,ABCC3,LPIN2,FAH,IDH1,RETSAT,TMBIM6,FAS,PTGES,SERTAD1,ALDH9A1,GSTM4,GCLC,ACP2,PROS1,REG1A,ECH1,AP4B1,ATOH8,AKR1C3,LEAP2,DHRS1,ACO2,DDC,APOE,PTS,TDO2,IL1R1,ETFDH,BLVRB,NMT1,NQO1,FMO1,…	82	0.42487	ABCC2,ABCC3,ABCD2,ABHD6,ACO2,ACOX1,ACOX2,ACOX3,ACP1,ACP2,ACSM1,ADH1C,ADH5,AHCY,AKR1C2,AKR1C3,ALAS1,ALDH2,ALDH3A1,ALDH9A1,ANGPTL3,AOX1,AP4B1,APOE,AQP9,ARG1,ARG2,ARPP19,ASL,ATOH8,ATP2A2,BCAR1,BCAT1,BLVRB,BPHL,CA2,CASP6,CAT,CBR1,CD36,CDA,CDO1,CES1,CFB,CNDP2,COMT,CROT,CRP,CSAD,CYB5A,CYFIP2,CYP17A1,CYP1A1,CYP1A2,CYP26A1,CYP27A1,CYP2C18,CYP2E1,CYP2J2,CYP2S1,CYP4F2,DCXR,DDAH2,DDC,DDT,DHPS,DHRS1,DHRS7,EC…	Human
NCB-CB	_tstat	within each collection	H: hallmark gene sets	HALLMARK_IL2_STAT5_SIGNALING	0.000582	0.00171297	-0.30623	-1.5856	0	190	GBP4,CASP3,TIAM1,FLT3LG,SELL,IL4R,SNX9,CYFIP1,CSF1,IL10,GALM,BATF3,CD86,ANXA4,GPR65,IRF8,P2RX4,LTB,BATF,SOCS2,CDC42SE2,GSTO1,ENO3,CAPN3,TNFRSF1B,CISH,SHE,PRKCH,SELP,CST7,IL2RB,XBP1,DCPS,CD48,EOMES,IL10RA,IL2RA,SMPDL3A,TNFRSF4,TNFSF10,TNFRSF8,TNFRSF9,PLEC,ABCB1,TLR7,AGER,IRF4,PLSCR1,RHOH,FAM126B,TGM2,TNFRSF18,MYO1E,SNX14,PDCD2L,CTLA4,DHRS3,ICOS,FAH,FGL2,CD79B,AMACR,IL1R2,ADAM19,S100A1,ST3GAL4,TNFS…	73	0.384211	ABCB1,ADAM19,AGER,AHCY,AHNAK,AHR,ALCAM,AMACR,ANXA4,APLP1,ARL4A,BATF,BATF3,BCL2,BCL2L1,BHLHE40,BMP2,BMPR2,CA2,CAPG,CAPN3,CASP3,CCND2,CCND3,CCNE1,CCR4,CD44,CD48,CD79B,CD81,CD83,CD86,CDC42SE2,CDC6,CDCP1,CDKN1C,CISH,CKAP4,COCH,COL6A1,CSF1,CST7,CTLA4,CTSZ,CXCL10,CYFIP1,DCPS,DENND5A,DHRS3,ECM1,EMP1,ENO3,ENPP1,EOMES,ETV4,F2RL2,FAH,FAM126B,FGL2,FLT3LG,FURIN,GABARAPL1,GADD45B,GALM,GBP4,GLIPR2,GPR65,GPR83,…	Human
NCB-CB	_tstat	within each collection	H: hallmark gene sets	HALLMARK_BILE_ACID_METABOLISM	0.00053	0.00171297	-0.376643	-1.78821	0	109	HSD3B7,BCAR3,GCLM,ABCG4,SLC23A1,LCK,ACSL5,LIPE,ABCD1,ABCA1,NEDD4,SCP2,PEX7,PEX26,PECR,ABCD2,SOD1,PEX1,RXRG,GSTK1,SULT2B1,CROT,ABCA3,HSD17B11,IDH1,RETSAT,PAOX,AMACR,OPTN,PEX13,ALDH9A1,MLYCD,CYP7B1,HSD17B4,SLC22A18,ISOC1,CH25H,LONP2,ATXN1,IDI1,SULT1B1,ABCA4,PEX12,PXMP2,EPHX2,NR1I2,GNMT,ABCD3,ALDH8A1,ABCA9,ACSL1,PHYH	52	0.477064	ABCA1,ABCA2,ABCA3,ABCA4,ABCA5,ABCA6,ABCA8,ABCA9,ABCD1,ABCD2,ABCD3,ABCG4,ABCG8,ACSL1,ACSL5,AGXT,AKR1D1,ALDH1A1,ALDH8A1,ALDH9A1,AMACR,APOA1,AQP9,AR,ATXN1,BBOX1,BCAR3,BMP6,CAT,CH25H,CROT,CYP27A1,CYP39A1,CYP46A1,CYP7A1,CYP7B1,CYP8B1,DHCR24,DIO1,DIO2,EFHC1,EPHX2,FADS1,FADS2,FDXR,GC,GCLM,GNMT,GNPAT,GSTK1,HACL1,HAO1,HSD17B11,HSD17B4,HSD17B6,HSD3B7,IDH1,IDH2,IDI1,ISOC1,LCK,LIPE,LONP2,MLYCD,NEDD4,NPC1,NR0…	Human
NCB-CB	_tstat	within each collection	H: hallmark gene sets	HALLMARK_COMPLEMENT	0.000578	0.00171297	-0.377092	-1.94843	0	188	APOBEC3G,PSMB9,USP16,CASP10,ME1,C2,ATOX1,CASP3,IRF2,PHEX,IRF1,GNGT2,FDX1,RASGRP1,SH2B3,GP1BA,L3MBTL4,CASP4,EHD1,DOCK9,PLEK,APOBEC3F,FCER1G,CTSS,WAS,ITGAM,LAMP2,CASP7,USP8,CASP1,KCNIP2,LCK,C1QA,FCN1,GZMB,LAP3,JAK2,C1QC,ADRA2B,BRPF3,KLK1,PRSS36,GZMK,DPP4,CR1,CD40LG,CALM3,PIK3CG,S100A13,TIMP1,PIK3R5,GZMA,CTSO,KYNU,LCP2,CD36,LYN,SCG3,DUSP5,PLSCR1,ERAP2,ZFPM2,DOCK10,CCL5,CTSH,RHOG,STX4,S100A9,MMP13,CP…	79	0.420213	ACTN2,ADAM9,ADRA2B,AKAP10,ANG,ANXA5,APOA4,APOBEC3F,APOBEC3G,APOC1,ATOX1,BRPF3,C1QA,C1QC,C1R,C1S,C2,C3,C4BPB,C9,CA2,CALM1,CALM3,CASP1,CASP10,CASP3,CASP4,CASP7,CASP9,CBLB,CCL5,CD36,CD40LG,CD46,CD55,CD59,CDA,CDH13,CDK5R1,CEBPB,CFB,CFH,CLU,COL4A2,CP,CPM,CR1,CR2,CSRP1,CTSB,CTSC,CTSD,CTSH,CTSO,CTSS,CXCL1,DGKG,DGKH,DOCK10,DOCK4,DOCK9,DPP4,DUSP5,DUSP6,DYRK2,EHD1,ERAP2,F10,F2,F3,F5,F7,F8,FCER1G,FCN1,FDX1,…	Human
NCB-CB	_tstat	within each collection	H: hallmark gene sets	HALLMARK_REACTIVE_OXIGEN_SPECIES_PATHWAY	0.000478	0.00171297	-0.493333	-1.99738	0	46	GPX3,ATOX1,FES,MPO,HHEX,GCLM,IPCEF1,SCAF4,GLRX,PDLIM1,PRDX4,HMOX2,SOD2,NDUFA6,TXNRD2,SOD1,MBP,MSRA,GCLC,PRDX1,SRXN1,TXN	22	0.478261	ABCC1,ATOX1,CAT,CDKN2D,EGLN2,ERCC2,FES,FTL,G6PD,GCLC,GCLM,GLRX,GLRX2,GPX3,GPX4,GSR,HHEX,HMOX2,IPCEF1,JUNB,LSP1,MBP,MGST1,MPO,MSRA,NDUFA6,NDUFB4,NDUFS2,NQO1,OXSR1,PDLIM1,PFKP,PRDX1,PRDX2,PRDX4,PRDX6,PRNP,SBNO2,SCAF4,SOD1,SOD2,SRXN1,STK25,TXN,TXNRD1,TXNRD2	Human
NCB-CB	_tstat	within each collection	H: hallmark gene sets	HALLMARK_ADIPOGENESIS	0.000578	0.00171297	-0.429327	-2.21303	0	185	IDH3A,GPX3,ME1,CMBL,DRAM2,DGAT1,UQCR11,MGLL,DNAJC15,LIFR,GHITM,PREB,SUCLG1,ESRRA,DECR1,AIFM1,DLD,STAT5A,AGPAT3,GADD45A,ELMOD3,CYC1,ARAF,PPM1B,CMPK1,REEP5,TALDO1,DHRS7,LIPE,HADH,SULT1A1,ABCA1,SNCG,BCL2L13,UQCR10,GRPEL1,SLC5A6,NDUFAB1,DNAJB9,SCP2,CHCHD10,CRAT,PPARG,TKT,PTGER3,ENPP2,SDHB,PRDX3,UQCRQ,SLC19A1,CD36,SOD1,MTCH2,MYLK,ECHS1,ACADS,RREB1,QDPR,SLC25A1,PIM3,FAH,IDH1,IDH3G,RETSAT,UQCRC1,ITGA7,A…	85	0.459459	ABCA1,ABCB8,ACAA2,ACADL,ACADM,ACADS,ACLY,ACO2,ACOX1,ADCY6,ADIPOQ,ADIPOR2,AGPAT3,AIFM1,AK2,ALDH2,ALDOA,ANGPT1,ANGPTL4,APLP2,APOE,ARAF,ARL4A,ATL2,ATP1B3,BAZ2A,BCKDHA,BCL2L13,BCL6,C3,CAT,CCNG2,CD151,CD302,CD36,CDKN2C,CHCHD10,CHUK,CMBL,CMPK1,COL15A1,COL4A1,COQ3,COQ5,COQ9,COX6A1,COX7B,COX8A,CPT2,CRAT,CS,CYC1,CYP4B1,DBT,DDT,DECR1,DGAT1,DHCR7,DHRS7,DHRS7B,DLAT,DLD,DNAJB9,DNAJC15,DRAM2,ECH1,ECHS1,ELMOD3,…	Human
NCB-CB	_tstat	within each collection	H: hallmark gene sets	HALLMARK_FATTY_ACID_METABOLISM	0.000564	0.00171297	-0.449334	-2.24479	0	150	NBN,SDHD,UBE2L6,SDHA,ME1,PSME1,RAP1GDS1,MGLL,PCBD1,SUCLG1,CBR1,G0S2,HADHB,HCCS,DECR1,DLD,CRYZ,UGDH,ENO3,ACSL5,HADH,NSDHL,MDH1,SLC22A5,ACSM3,SUCLG2,METAP1,CRAT,MCEE,CD1D,EPHX1,CBR3,NCAPH2,CD36,ECHS1,ACADS,ACOT2,PDHA1,HSDL2,HSD17B11,S100A10,IDH1,IDH3G,RETSAT,BLVRA,GPD1,FH,ECI2,ECI1,ERP29,ALDH9A1,ACAA1,PPARA,ACSL4,MLYCD,CPT1A,ECH1,HSD17B4,OSTC,CPT2,YWHAH,MDH2,ACO2,PTS,TDO2,ETFDH,HSD17B10,D2HGDH,UROD…	80	0.533333	AADAT,ACAA1,ACAA2,ACADL,ACADM,ACADS,ACADVL,ACAT2,ACO2,ACOT2,ACOT8,ACOX1,ACSL1,ACSL4,ACSL5,ACSM3,ACSS1,ADH1C,ADIPOR2,ADSL,ALAD,ALDH1A1,ALDH3A1,ALDH3A2,ALDH9A1,ALDOA,AOC3,APEX1,AQP7,AUH,BCKDHB,BLVRA,BMPR1B,BPHL,CA2,CA4,CBR1,CBR3,CCDC58,CD1D,CD36,CEL,CPOX,CPT1A,CPT2,CRAT,CRYZ,CYP1A1,CYP4A11,CYP4A22,D2HGDH,DECR1,DHCR24,DLD,DLST,ECH1,ECHS1,ECI1,ECI2,EHHADH,ELOVL5,ENO2,ENO3,EPHX1,ERP29,ETFDH,FABP1,FASN…	Human
NCB-CB	_tstat	within each collection	H: hallmark gene sets	HALLMARK_IL6_JAK_STAT3_SIGNALING	0.000521	0.00171297	-0.510722	-2.29174	0	81	IL15RA,IRF1,CCR1,IL4R,IL13RA1,MYD88,CSF1,IL17RA,LTB,ITGA4,IFNAR1,IL12RB1,IL10RB,TNFRSF1B,CXCL11,TLR2,IL1B,CD14,CSF2RA,EBI3,LTBR,IL7,IL2RA,PIK3R5,CSF3R,IL2RG,CD36,CSF2RB,TNFRSF1A,CCL7,ACVRL1,CD38,CXCL9,HMOX1,BAK1,CXCL13,FAS,ITGB3,IL1R2,TNF,REG1A,IL3RA,CXCL10,PTPN11,PIM1,TNFRSF21,STAT1,IL1R1,A2M,IL17RB,SOCS1,OSMR,GRB2	53	0.654321	A2M,ACVR1B,ACVRL1,BAK1,CBL,CCL7,CCR1,CD14,CD36,CD38,CD44,CD9,CNTFR,CSF1,CSF2RA,CSF2RB,CSF3R,CXCL1,CXCL10,CXCL11,CXCL13,CXCL3,CXCL9,EBI3,FAS,GRB2,HAX1,HMOX1,IFNAR1,IFNGR1,IFNGR2,IL10RB,IL12RB1,IL13RA1,IL15RA,IL17RA,IL17RB,IL18R1,IL1B,IL1R1,IL1R2,IL2RA,IL2RG,IL3RA,IL4R,IL6,IL6ST,IL7,INHBE,IRF1,IRF9,ITGA4,ITGB3,JUN,LEPR,LTB,LTBR,MAP3K8,MYD88,OSMR,PDGFC,PIK3R5,PIM1,PLA2G2A,PTPN1,PTPN11,PTPN2,REG1A,SO…	Human
NCB-CB	_tstat	within each collection	H: hallmark gene sets	HALLMARK_OXIDATIVE_PHOSPHORYLATION	0.000569	0.00171297	-0.445256	-2.29719	0	183	IDH3A,TCIRG1,SDHD,ATP6V0E1,SDHA,MTRR,COX5A,UQCR11,NDUFS7,FDX1,HTRA2,NDUFA1,ATP6V1C1,SUCLG1,SLC25A5,HADHB,HCCS,DECR1,AIFM1,UQCRB,DLD,ETFA,VDAC1,MRPS30,CYC1,CASP7,SLC25A4,COX6C,HADHA,COX7A2L,MDH1,UQCR10,GRPEL1,SLC25A11,COX6B1,OAT,NDUFAB1,HSPA9,SLC25A20,ATP6V1E1,UQCRFS1,MRPL11,GLUD1,MRPS15,SDHB,UQCRC2,PRDX3,MRPS12,MRPL34,UQCRQ,NDUFA6,ECHS1,NDUFS6,FXN,NDUFS4,GOT2,NDUFS1,COX4I1,PDK4,ISCU,NDUFB3,MRPL35…	99	0.540984	ABCB7,ACAA1,ACAA2,ACADM,ACADSB,ACADVL,ACAT1,ACO2,AFG3L2,AIFM1,ALAS1,ALDH6A1,ATP1B1,ATP6AP1,ATP6V0B,ATP6V0C,ATP6V0E1,ATP6V1C1,ATP6V1D,ATP6V1E1,ATP6V1F,ATP6V1G1,ATP6V1H,BAX,BCKDHA,BDH2,CASP7,COX10,COX11,COX15,COX17,COX4I1,COX5A,COX5B,COX6A1,COX6B1,COX6C,COX7A2,COX7A2L,COX7B,COX7C,COX8A,CPT1A,CS,CYB5A,CYB5R3,CYC1,CYCS,DECR1,DLAT,DLD,DLST,ECH1,ECHS1,ECI1,ETFA,ETFB,ETFDH,FDX1,FH,FXN,GLUD1,GOT2,GPI,GPX…	Human
NCB-CB	_tstat	within each collection	H: hallmark gene sets	HALLMARK_INFLAMMATORY_RESPONSE	0.000578	0.00171297	-0.450658	-2.32854	0	188	CD40,NFKB1,IL15RA,SCN1B,TAPBP,IRF1,TLR1,C3AR1,SELL,IL4R,BEST1,CCL24,CYBB,RASGRP1,IRAK2,RTP4,LY6E,BST2,IL15,CD69,CSF1,GP1BA,IL10,C5AR1,LTA,IL18RAP,P2RX4,GPR132,IFITM1,SLC28A2,CMKLR1,EIF2AK2,LCK,NMI,NOD2,IFNAR1,RIPK2,TNFRSF1B,CXCL11,ABCA1,CCRL2,TLR2,IL2RB,HPN,SLAMF1,IL1B,CCR7,SLC31A2,IL18,CD14,P2RX7,EBI3,CD48,SGMS2,SLC7A2,AXL,IL10RA,TIMP1,CXCR6,STAB1,PIK3R5,CSF3R,NMUR1,PTAFR,TNFSF15,TNFSF10,MARCO,L…	92	0.489362	ABCA1,ABI1,ACVR1B,ACVR2A,ADM,ADORA2B,ADRM1,AHR,APLNR,AQP9,ATP2A2,ATP2B1,ATP2C1,AXL,BEST1,BST2,BTG2,C3AR1,C5AR1,CALCRL,CCL2,CCL20,CCL22,CCL24,CCL5,CCL7,CCR7,CCRL2,CD14,CD40,CD48,CD55,CD69,CD70,CD82,CDKN1A,CHST2,CLEC5A,CMKLR1,CSF1,CSF3R,CX3CL1,CXCL10,CXCL11,CXCL6,CXCL9,CXCR6,CYBB,DCBLD2,EBI3,EDN1,EIF2AK2,EMP3,EREG,F3,FPR1,FZD5,GABBR1,GCH1,GNA15,GNAI3,GP1BA,GPC3,GPR132,GPR183,HAS2,HBEGF,HIF1A,HPN,HR…	Human
NCB-CB	_tstat	within each collection	H: hallmark gene sets	HALLMARK_ALLOGRAFT_REJECTION	0.000578	0.00171297	-0.554246	-2.86378	0	188	CD40,B2M,HLA-DOA,HLA-DOB,C2,EIF3J,PSMB10,TAP2,HLA-E,TAPBP,HLA-DMA,CCR1,TLR1,MTIF2,MAP4K1,IL4R,CD74,CD28,TAP1,IL15,HLA-A,CSF1,IL10,IL27RA,HLA-DRA,SRGN,CD86,TLR6,GPR65,IL18RAP,IRF8,SIT1,TRAT1,LTB,CTSS,WAS,CD4,ZAP70,FASLG,CRTAM,CSK,ITK,CD3D,FGR,CD247,ITGB2,ITGAL,LCK,IFNAR2,LY75,ETS1,CD80,IL12RB1,UBE2D1,RIPK2,GZMB,HLA-DMB,SPI1,JAK2,IGSF6,NCF4,TLR2,IL2RB,IL1B,RPL39,PTPRC,BCL3,IL18,NOS2,CCR5,CD40LG,GBP…	103	0.547872	AARS,ABCE1,ABI1,ACHE,ACVR2A,AKT1,APBB1,B2M,BCAT1,BCL10,BCL3,BRCA1,C2,CAPG,CCL11,CCL13,CCL19,CCL2,CCL22,CCL4,CCL5,CCL7,CCND2,CCND3,CCR1,CCR2,CCR5,CD1D,CD2,CD247,CD28,CD3D,CD3E,CD3G,CD4,CD40,CD40LG,CD47,CD7,CD74,CD79A,CD80,CD86,CD8A,CD8B,CD96,CDKN2A,CFP,CRTAM,CSF1,CSK,CTSS,CXCL13,CXCL9,CXCR3,DARS,DEGS1,DYRK3,EGFR,EIF3A,EIF3D,EIF3J,EIF4G3,EIF5A,ELF4,EREG,ETS1,F2,F2R,FAS,FASLG,FCGR2B,FGR,FLNA,GALNT1,…	Human
NCB-CB	_tstat	within each collection	H: hallmark gene sets	HALLMARK_INTERFERON_GAMMA_RESPONSE	0.00058	0.00171297	-0.617418	-3.2178	0	197	LYSMD2,CD40,NFKB1,B2M,PSMB8,IL15RA,PSMB9,TRIM25,UBE2L6,GBP4,BATF2,PSME1,PSMB10,CASP3,IRF2,CASP8,SAMD9L,TAPBP,HLA-DMA,IRF1,IFI35,CD274,IL4R,BANK1,VAMP8,UPP1,GBP6,CD74,TRIM21,APOL6,MYD88,RTP4,LY6E,BST2,TAP1,IL15,HLA-A,CD69,XAF1,PARP14,VAMP5,HLA-B,CASP4,CIITA,DHX58,EIF4E3,CD86,IFIT3,IRF8,PARP12,RAPGEF6,MX1,GPR18,IRF5,OAS3,HERC6,CMKLR1,OAS2,NLRC5,CASP7,METTL7B,SPPL2A,CASP1,EPSTI1,EIF2AK2,MARCH1,TRIM1…	117	0.593909	ADAR,APOL6,ARID5B,ARL4A,AUTS2,B2M,BANK1,BATF2,BPGM,BST2,BTG1,C1R,C1S,CASP1,CASP3,CASP4,CASP7,CASP8,CCL2,CCL5,CCL7,CD274,CD38,CD40,CD69,CD74,CD86,CDKN1A,CFB,CFH,CIITA,CMKLR1,CMPK2,CSF2RB,CXCL10,CXCL11,CXCL9,DDX58,DDX60,DHX58,EIF2AK2,EIF4E3,EPSTI1,FAS,FCGR1A,FGL2,FPR1,GBP4,GBP6,GCH1,GPR18,GZMA,HERC6,HIF1A,HLA-A,HLA-B,HLA-DMA,HLA-DQA1,HLA-DRB1,HLA-G,ICAM1,IDO1,IFI27,IFI30,IFI35,IFI44,IFI44L,IFIH1,IF…	Human
NCB-CB	_tstat	within each collection	H: hallmark gene sets	HALLMARK_INTERFERON_ALPHA_RESPONSE	0.000521	0.00171297	-0.712243	-3.28651	0	93	UBA7,B2M,PSMB8,PSMB9,TRIM25,UBE2L6,GBP4,BATF2,PSME1,IRF2,CASP8,SAMD9L,OAS1,IRF1,IFI35,SELL,IL4R,TMEM140,CD74,TRIM21,SAMD9,RTP4,LY6E,BST2,TAP1,IL15,PARP14,CSF1,HLA-C,DHX58,IFIT3,PARP12,MX1,IFITM1,HERC6,CASP1,EPSTI1,EIF2AK2,TRIM14,NMI,TXNIP,PARP9,TRIM26,RIPK2,SLC25A28,CXCL11,TDRD7,CCRL2,LAP3,CMPK2,NUB1,IFIT2,IFIH1,ISG20,SP110,GBP2,IL7,IFI44L,USP18,DDX60,WARS	61	0.655914	ADAR,B2M,BATF2,BST2,C1S,CASP1,CASP8,CCRL2,CD47,CD74,CMPK2,CNP,CSF1,CXCL10,CXCL11,DDX60,DHX58,EIF2AK2,ELF1,EPSTI1,GBP2,GBP4,GMPR,HERC6,HLA-C,IFI27,IFI30,IFI35,IFI44,IFI44L,IFIH1,IFIT2,IFIT3,IFITM1,IFITM2,IFITM3,IL15,IL4R,IL7,IRF1,IRF2,IRF7,IRF9,ISG15,ISG20,LAMP3,LAP3,LGALS3BP,LPAR6,LY6E,MOV10,MX1,NCOA7,NMI,NUB1,OAS1,OASL,OGFR,PARP12,PARP14,PARP9,PLSCR1,PNPT1,PROCR,PSMA3,PSMB8,PSMB9,PSME1,PSME2,RIP…	Human
NCB-CB	_tstat	within each collection	BP: GO biological process	GO_ADAPTIVE_IMMUNE_RESPONSE	0.000604	0.00532127	-0.55725	-2.98372	0	246	NBN,RAB27A,C2,TAP2,TFEB,HLA-E,MICB,POU2F2,IGLV7-43,LAT2,C3AR1,IL4R,LILRB1,CD74,IGHV2-70,BTN3A2,BTK,TAP1,RNF125,TNFRSF13B,BTN3A3,IGKV1D-33,IGKV3D-20,LAT,CD86,TLR6,IGKV3D-11,IGLL5,HAVCR2,SIT1,TRAT1,CLEC4A,FCER1G,CD209,CTSS,BATF,CD4,ZAP70,TRDC,RNF19B,SH2D1B,BTN3A1,CRTAM,CSK,CD84,ITK,MYO1G,ERAP1,SKAP1,TNFRSF17,LAIR1,TLR4,TNFRSF11A,LILRA6,C1QA,THEMIS,RIPK2,LILRA1,IGLC1,SLAMF6,IGKV1-5,FCRL4,JAK2,C1QC,K…	137	0.556911	ADAM17,ALCAM,ANXA1,BATF,BCL10,BCL3,BCL6,BTK,BTLA,BTN3A1,BTN3A2,BTN3A3,C1QA,C1QB,C1QBP,C1QC,C1R,C1RL,C1S,C2,C3,C3AR1,C4A,C4B,C4BPA,C4BPB,C5,C6,C7,C8A,C8B,C8G,C9,CADM1,CAMK4,CD1A,CD1C,CD1E,CD209,CD244,CD27,CD4,CD40LG,CD46,CD55,CD6,CD7,CD74,CD79A,CD79B,CD84,CD86,CD8A,CD8B,CFI,CLEC10A,CLEC4A,CLEC4C,CLEC4M,CLEC6A,CLU,CR1,CR2,CRTAM,CSK,CTLA4,CTSC,CTSH,CTSS,CXCL13,DBNL,DCLRE1C,DENND1B,DLG1,EBI3,EIF2AK4,…	Human
NCB-CB	_tstat	within each collection	BP: GO biological process	GO_RESPONSE_TO_INTERFERON_GAMMA	0.000532	0.00530695	-0.591187	-2.87968	0	129	B2M,TRIM25,TRIM34,CAMK2D,IRF2,HLA-E,OAS1,IRF1,GBP6,HLA-F,TRIM21,CCL4L2,CCL24,CCL3,BST2,HLA-A,CD58,TRIM31,HLA-C,HLA-B,HLA-DPA1,HLA-DRA,CIITA,CD86,C19orf66,AIF1,IRF8,IFITM1,IRF5,OAS3,JAK1,OAS2,TRIM22,GBP1,CAMK2G,IL12RB1,TRIM26,GBP5,JAK2,HLA-DPB1,NUB1,NOS2,SP100,FCGR1B,VCAM1,GBP2,HCK,CCL8,TRIM38,XCL2,PTAFR,FCGR1A,CCL4,MRC1,KYNU,HLA-G,CCL21,CAMK2A,GCH1,IRF4,CCL7,CYP27B1,CCL5,CCL23,TRIM5,UBD,ADAMTS13,…	84	0.651163	ADAMTS13,AIF1,AQP4,ASS1,B2M,BST2,C19orf66,CALCOCO2,CAMK2A,CAMK2B,CAMK2D,CAMK2G,CCL11,CCL13,CCL14,CCL15,CCL16,CCL18,CCL19,CCL2,CCL20,CCL21,CCL22,CCL23,CCL24,CCL3,CCL4,CCL4L2,CCL5,CCL7,CCL8,CD44,CD58,CD86,CIITA,CX3CL1,CXCL16,CYP27B1,DAPK1,DAPK3,DNAJA3,EDN1,EPRS,FCGR1A,FCGR1B,GAPDH,GBP1,GBP2,GBP5,GBP6,GCH1,HCK,HLA-A,HLA-B,HLA-C,HLA-DPA1,HLA-DPB1,HLA-DQA1,HLA-DQA2,HLA-DQB1,HLA-DQB2,HLA-DRA,HLA-DRB1,H…	Human
NCB-CB	_tstat	within each collection	BP: GO biological process	GO_INNATE_IMMUNE_RESPONSE	0.000749	0.00560757	-0.494	-2.8473	0	483	NFKB1,B2M,PSMB8,CAPZA2,APOBEC3D,APOBEC3G,RAB27A,GSDMD,TRIM25,ZC3HAV1,C2,TRIM34,CAMK2D,IRF2,FES,HLA-E,IL1RL2,MICB,APOL1,OAS1,HERC5,IRF1,IFI35,TLR1,AIM2,TNFAIP8L2,BLK,VSIG4,GBP6,HLA-F,TRIM21,TICAM2,CCL4L2,CCL24,CYBB,MAP3K5,MYD88,BTK,NLRX1,CCL3,BST2,HLA-A,XAF1,CD58,TRIM31,CSF1,HLA-C,HLA-B,MATK,CASP4,DEFA1,HLA-DPA1,HLA-DRA,CIITA,LY96,CD180,DHX58,CD86,TLR6,IFIT3,C19orf66,AIF1,VAMP7,IRF8,IGLL5,HAVCR2,I…	249	0.515528	ABL1,ABL2,ADAM15,ADAMTS13,ADAR,ADARB1,AGER,AIF1,AIM2,AKAP8,AKIRIN2,ANG,ANKHD1,ANKRD17,ANXA1,APCS,APOA4,APOBEC3A,APOBEC3B,APOBEC3C,APOBEC3D,APOBEC3F,APOBEC3G,APOL1,APP,AQP4,ARHGEF2,ASS1,ATG12,ATG5,AXL,B2M,BCL10,BLK,BMX,BST2,BTK,C19orf66,C1QA,C1QB,C1QBP,C1QC,C1R,C1RL,C1S,C2,C3,C4A,C4B,C4BPA,C4BPB,C5,C6,C7,C8A,C8B,C8G,C9,CALCOCO2,CAMK2A,CAMK2B,CAMK2D,CAMK2G,CAPZA1,CAPZA2,CARD9,CASP4,CCL11,CCL13,CCL1…	Human
NCB-CB	_tstat	within each collection	BP: GO biological process	GO_CELLULAR_RESPONSE_TO_INTERFERON_GAMMA	0.000507	0.00530695	-0.587908	-2.80016	0	110	B2M,TRIM25,TRIM34,CAMK2D,IRF2,HLA-E,OAS1,IRF1,GBP6,HLA-F,TRIM21,CCL4L2,CCL24,CCL3,HLA-A,CD58,TRIM31,HLA-C,HLA-B,HLA-DPA1,HLA-DRA,CIITA,AIF1,IRF8,IRF5,OAS3,JAK1,OAS2,TRIM22,GBP1,CAMK2G,IL12RB1,TRIM26,GBP5,JAK2,HLA-DPB1,NOS2,SP100,FCGR1B,VCAM1,GBP2,HCK,CCL8,TRIM38,XCL2,PTAFR,FCGR1A,CCL4,MRC1,HLA-G,CCL21,CAMK2A,IRF4,CCL7,CCL5,CCL23,TRIM5,CAMK2B,TLR3,PML,DAPK1,LGALS9,HLA-DQA2,IRF7,CX3CL1,CCL13,CCL18,…	72	0.654545	AIF1,AQP4,ASS1,B2M,CAMK2A,CAMK2B,CAMK2D,CAMK2G,CCL11,CCL13,CCL14,CCL15,CCL16,CCL18,CCL19,CCL2,CCL20,CCL21,CCL22,CCL23,CCL24,CCL3,CCL4,CCL4L2,CCL5,CCL7,CCL8,CD44,CD58,CIITA,CX3CL1,DAPK1,DAPK3,EDN1,EPRS,FCGR1A,FCGR1B,GAPDH,GBP1,GBP2,GBP5,GBP6,HCK,HLA-A,HLA-B,HLA-C,HLA-DPA1,HLA-DPB1,HLA-DQA1,HLA-DQA2,HLA-DQB1,HLA-DQB2,HLA-DRA,HLA-DRB1,HLA-DRB5,HLA-E,HLA-F,HLA-G,ICAM1,IFI30,IFNG,IFNGR1,IFNGR2,IL12RB1…	Human
NCB-CB	_tstat	within each collection	BP: GO biological process	GO_INTERFERON_GAMMA_MEDIATED_SIGNALING_PATHWAY	0.00048	0.00530695	-0.639522	-2.765	0	67	B2M,TRIM25,TRIM34,CAMK2D,IRF2,HLA-E,OAS1,IRF1,HLA-F,TRIM21,HLA-A,TRIM31,HLA-C,HLA-B,HLA-DPA1,HLA-DRA,CIITA,IRF8,IRF5,OAS3,JAK1,OAS2,TRIM22,GBP1,CAMK2G,TRIM26,JAK2,HLA-DPB1,SP100,FCGR1B,VCAM1,GBP2,HCK,TRIM38,PTAFR,FCGR1A,HLA-G,CAMK2A,IRF4	39	0.58209	B2M,CAMK2A,CAMK2B,CAMK2D,CAMK2G,CD44,CIITA,FCGR1A,FCGR1B,GBP1,GBP2,HCK,HLA-A,HLA-B,HLA-C,HLA-DPA1,HLA-DPB1,HLA-DQA1,HLA-DQA2,HLA-DQB1,HLA-DQB2,HLA-DRA,HLA-DRB1,HLA-DRB5,HLA-E,HLA-F,HLA-G,ICAM1,IFI30,IFNG,IFNGR1,IFNGR2,IRF1,IRF2,IRF3,IRF4,IRF5,IRF6,IRF7,IRF8,IRF9,JAK1,JAK2,MID1,MT2A,NCAM1,OAS1,OAS2,OAS3,OASL,PML,PRKCD,PTAFR,SP100,STAT1,TRIM21,TRIM22,TRIM25,TRIM26,TRIM31,TRIM34,TRIM38,TRIM5,TRIM62,…	Human
NCB-CB	_tstat	within each collection	BP: GO biological process	GO_POSITIVE_REGULATION_OF_CELL_ACTIVATION	0.000627	0.00533609	-0.494178	-2.68057	0	277	CD40,TNFRSF14,ATP11C,BST1,TNFSF13B,VAV1,PRKCQ,HLA-E,IL1RL2,CCDC88B,FLT3LG,CD274,PRR5,IL4R,LILRB1,VAMP8,CD74,CD28,BTK,RASGRP1,TRAC,PDCD1LG2,IL15,STAP1,HLA-A,CARD11,TBX21,NFATC2,HLA-DPA1,HLA-DRA,PLEK,NCKAP1L,CD86,AIF1,VAMP7,NKAP,IGLL5,HAVCR2,SIRPG,FCER1G,TIRAP,CD4,ZAP70,TRDC,MAP3K14,CSK,CD3D,IL33,ADA,FGR,CD247,LCK,TLR4,SASH3,NOD2,CAPN3,CD80,IL12RB1,RIPK2,IGLC1,HLA-DMB,SELP,JAK2,HLA-DPB1,KLRK1,RAG1,…	139	0.501805	ADA,ADAM8,ADK,ADORA2B,AGER,AIF1,AKT1,ANXA1,AP1G1,AP3B1,AP3D1,ATP11C,AXL,BAD,BCL10,BCL2,BCL6,BLOC1S3,BST1,BTK,BTLA,CAPN3,CARD11,CAV1,CCDC88B,CCL19,CCL2,CCL21,CCL5,CCR2,CCR7,CD1D,CD2,CD226,CD24,CD244,CD247,CD27,CD274,CD276,CD28,CD38,CD3D,CD3E,CD3G,CD4,CD40,CD40LG,CD46,CD47,CD5,CD55,CD59,CD6,CD74,CD80,CD81,CD83,CD86,CDC42,CDKN1A,CLCF1,CORO1A,CSK,CTLA4,DHPS,DNAJA3,DPP4,EBI3,EFNB1,EFNB2,EFNB3,EGR3,EPO…	Human
NCB-CB	_tstat	within each collection	BP: GO biological process	GO_REGULATION_OF_LEUKOCYTE_MEDIATED_IMMUNITY	0.000545	0.00530695	-0.532963	-2.62903	0	141	CD40,B2M,HFE,VAV1,FES,HLA-E,IL4R,LILRB1,VAMP8,CD28,NCR3,BTK,RASGRP1,BST2,TAP1,STAP1,HLA-A,IL10,IL27RA,TBX21,HLA-B,FCER2,LTA,VAMP7,HAVCR2,FCER1G,WAS,ZAP70,SH2D1B,CRTAM,CD84,FGR,SERPINB9,TLR4,SASH3,RAC2,IL12RB1,CD300A,SLAMF6,KLRK1,RIPK3,SLAMF1,IL1B,PTPRC,SNX6,P2RX7,NOS2,CR1,SH2D1A,SPN,PTAFR,CCR2,LAG3,UNC13D,BCR,NLRP3,LYN,PIK3R6,AGER,LAMP1,FOXP3,PRAM1,HMOX1,STAT6,ARRB2,FZD5,JAK3,PTPN6,KLRC4-KLRK1,TL…	74	0.524823	ABR,ADORA2B,AGER,AP1G1,APLF,ARRB2,B2M,BCL6,BCR,BST2,BTK,C12orf4,C3,C4BPA,C4BPB,CADM1,CCL2,CCR2,CD226,CD28,CD300A,CD40,CD84,CEACAM1,CLCF1,CLEC4G,CR1,CRTAM,DUSP22,EXOSC3,F2RL1,FADD,FCER1A,FCER1G,FCER2,FER,FES,FGR,FOXF1,FOXJ1,FOXP3,FZD5,GAB2,GATA3,HAVCR2,HFE,HLA-A,HLA-B,HLA-E,HMGB1,HMOX1,HPX,HSPD1,ICAM1,IFNG,IGF2,IL10,IL12A,IL12RB1,IL13RA2,IL1B,IL20RB,IL23A,IL27RA,IL4R,IL7R,JAK3,KLRC4-KLRK1,KLRK1,LA…	Human
NCB-CB	_tstat	within each collection	BP: GO biological process	GO_POSITIVE_REGULATION_OF_LEUKOCYTE_PROLIFERATION	0.000509	0.00530695	-0.544487	-2.62095	0	117	CD40,BST1,TNFSF13B,PRKCQ,HLA-E,CCDC88B,FLT3LG,CD274,CD74,CD28,PDCD1LG2,IL15,HLA-A,CSF1,CARD11,NFATC2,HLA-DPA1,NCKAP1L,CD86,AIF1,HAVCR2,TIRAP,CD4,ZAP70,ADA,TLR4,SASH3,CD80,IL12RB1,RIPK2,HLA-DMB,HLA-DPB1,MEF2C,LILRB2,SLAMF1,IL1B,PTPRC,RASAL3,IL18,CD6,EBI3,CD40LG,VCAM1,IL7,CD3E,IL2RA,CORO1A,SPN,CD1D,ADK,CCR2,TNFRSF4,LYN,AGER,GPR183,PYCARD,FOXP3,CD38,CCL5,JAK3,TACR1,CD244,LGALS9,IL23A,DNAJA3	65	0.555556	ADA,ADK,AGER,AIF1,ANXA1,BCL2,BCL6,BST1,CARD11,CCDC88B,CCL19,CCL5,CCR2,CD1D,CD24,CD244,CD274,CD276,CD28,CD38,CD3E,CD4,CD40,CD40LG,CD46,CD55,CD59,CD6,CD74,CD80,CD81,CD86,CDKN1A,CLCF1,CORO1A,CSF1,DHPS,DNAJA3,EBI3,EFNB1,EPO,FADD,FGF10,FLT3LG,FOXP3,GPAM,GPR183,HAVCR2,HES1,HLA-A,HLA-DMB,HLA-DPA1,HLA-DPB1,HLA-E,HMGB1,ICOSLG,IFNG,IGF1,IGF2,IGFBP2,IL12A,IL12RB1,IL15,IL18,IL1B,IL23A,IL2RA,IL6,IL6ST,IL7,IRS…	Human
NCB-CB	_tstat	within each collection	BP: GO biological process	GO_POSITIVE_REGULATION_OF_IMMUNE_EFFECTOR_PROCESS	0.000543	0.00530695	-0.530196	-2.61369	0	139	CD40,B2M,TNFRSF14,ZC3HAV1,VAV1,FES,HLA-E,IL4R,LILRB1,VAMP8,CD74,CD28,NCR3,RASGRP1,STAP1,HLA-A,TBX21,HLA-B,DHX58,CD86,FCER2,LTA,VAMP7,FCER1G,ZAP70,SH2D1B,CRTAM,CD84,IL33,FGR,TLR4,SASH3,RAC2,CD80,IL12RB1,CD300A,RIPK2,SLAMF6,HLA-DMB,KLRK1,IL1B,XBP1,SNX6,P2RX7,NOS2,SH2D1A,DDX60,PTAFR,CCR2,LAG3,HLX,UNC13D,TNFRSF4,CD36,NLRP3,LYN,LAMP1,FOXP3,MZB1,HMOX1,STAT6,FZD5,KLRC4-KLRK1,CD244,STX4,RSAD2,LGALS9,IL23…	77	0.553957	ADORA2B,ANKRD17,ANXA1,AP1G1,B2M,BCL10,C12orf4,C3,C6,CADM1,CCL19,CCL2,CCR2,CD226,CD244,CD28,CD300A,CD36,CD40,CD46,CD74,CD80,CD84,CD86,CLCF1,CRTAM,DDX60,DHX58,EXOSC3,F2RL1,FADD,FCER1A,FCER1G,FCER2,FER,FES,FGR,FOXF1,FOXP3,FZD5,GAB2,GATA3,GPRC5B,HLA-A,HLA-B,HLA-DMB,HLA-E,HLX,HMOX1,HPX,HSPD1,IFNG,IL12A,IL12RB1,IL13RA2,IL1B,IL23A,IL33,IL4R,IL6,KLK5,KLK7,KLRC4-KLRK1,KLRK1,LAG3,LAMP1,LBP,LGALS9,LILRB1,LT…	Human
NCB-CB	_tstat	within each collection	BP: GO biological process	GO_RESPONSE_TO_TYPE_I_INTERFERON	0.000477	0.00530695	-0.631792	-2.59552	0	53	PSMB8,IRF2,HLA-E,OAS1,IRF1,IFI35,HLA-F,BST2,HLA-A,XAF1,HLA-C,HLA-B,IFIT3,C19orf66,IRF8,MX1,IFITM1,IRF5,OAS3,JAK1,OAS2,IFNAR2,IFNAR1,IFIT2,IFIT1,ISG20,SP100,GBP2,HLA-G,TRIM56,IRF4,RNASEL,RSAD2,MX2,ISG15,EGR1,IRF7,IFI27,IFITM2,IFI6,OASL	41	0.773585	ADAR,BST2,C19orf66,EGR1,GBP2,HLA-A,HLA-B,HLA-C,HLA-E,HLA-F,HLA-G,IFI27,IFI35,IFI6,IFIT1,IFIT2,IFIT3,IFITM1,IFITM2,IFITM3,IFNAR1,IFNAR2,IKBKE,IP6K2,IRF1,IRF2,IRF3,IRF4,IRF5,IRF6,IRF7,IRF8,IRF9,ISG15,ISG20,JAK1,MX1,MX2,OAS1,OAS2,OAS3,OASL,PSMB8,RNASEL,RSAD2,SAMHD1,SHMT2,SP100,STAT1,STAT2,TRIM56,TYK2,XAF1	Human
NCB-CB	_tstat	within each collection	BP: GO biological process	GO_ACTIVATION_OF_IMMUNE_RESPONSE	0.000695	0.00545863	-0.452452	-2.55927	0	400	NFKB1,PSMB8,SPG21,PSMB9,PSME1,C2,PSMB10,VAV1,PRKCQ,CASP8,MICB,IGLV7-43,LAT2,ICAM2,CD19,TLR1,C3AR1,AIM2,STK11,CYLD,BLK,VSIG4,TNIP1,IGHV2-70,TICAM2,BIRC3,CD28,MYD88,BTK,TRAC,IRAK2,PSMA4,CYFIP1,PIK3AP1,IGKV1D-33,CARD11,ELMO1,NFATC2,HLA-DPA1,HLA-DRA,LY96,IGKV3D-20,LAT,CD180,C5AR1,NCKAP1L,CD86,TLR6,IGKV3D-11,IGLL5,HAVCR2,TRAT1,CLEC4A,FCER1G,CD209,TIRAP,CTSS,WAS,CD4,ZAP70,TRDC,BTN3A1,CSK,ITGAM,ITK,PRKA…	205	0.5125	ABI1,ABL1,ACTB,ACTG1,ACTR2,ACTR3,ADAM8,AIM2,ARPC1A,ARPC1B,ARPC2,ARPC3,ARPC4,ARPC5,BAIAP2,BAX,BCAR1,BCL10,BCL2,BIRC2,BIRC3,BLK,BRK1,BTK,BTN3A1,BTRC,C1QA,C1QB,C1QBP,C1QC,C1R,C1RL,C1S,C2,C3,C3AR1,C4A,C4B,C4BPA,C4BPB,C5,C5AR1,C6,C7,C8A,C8B,C8G,C9,CACNB3,CACNB4,CARD11,CARD9,CASP8,CD14,CD180,CD19,CD209,CD247,CD28,CD36,CD38,CD3D,CD3E,CD3G,CD4,CD46,CD55,CD79A,CD79B,CD86,CDC42,CFB,CFD,CFH,CFHR1,CFHR5,CFI,…	Human
NCB-CB	_tstat	within each collection	BP: GO biological process	GO_LIPOPOLYSACCHARIDE_MEDIATED_SIGNALING_PATHWAY	0.000447	0.00530695	-0.70341	-2.5376	0	30	IRAK2,CCL3,LY96,NOS3,MAPK14,PTPN22,TLR4,MTDH,RIPK2,TLR2,IL1B,IL18,CD14,CD6,MAPK3,HCK,PTAFR,MAPK1,LYN,NFKBIA,CCL5	21	0.7	AKT1,CCL2,CCL3,CCL5,CD14,CD6,HCK,IL18,IL1B,IRAK1,IRAK2,IRF3,LBP,LY96,LYN,MAPK1,MAPK14,MAPK3,MTDH,NFKBIA,NOS3,PRKCE,PTAFR,PTPN22,RIPK2,SCARB1,TICAM1,TLR2,TLR4,TNF	Human
NCB-CB	_tstat	within each collection	BP: GO biological process	GO_POSITIVE_REGULATION_OF_LEUKOCYTE_MEDIATED_IMMUNITY	0.000485	0.00530695	-0.571433	-2.53424	0	76	CD40,B2M,VAV1,HLA-E,IL4R,VAMP8,CD28,NCR3,RASGRP1,STAP1,HLA-A,TBX21,HLA-B,FCER2,LTA,VAMP7,FCER1G,ZAP70,SH2D1B,CRTAM,FGR,SASH3,IL12RB1,SLAMF6,KLRK1,IL1B,P2RX7,NOS2,SH2D1A,PTAFR,LAG3,NLRP3,LAMP1,FOXP3,STAT6,FZD5,KLRC4-KLRK1,STX4,RSAD2,IL23A,STAT5B,GAB2,TNF,AP1G1,IFNG,PAXIP1,CD226	47	0.618421	ADORA2B,AP1G1,B2M,C3,CADM1,CCL2,CD226,CD28,CD40,CLCF1,CRTAM,EXOSC3,F2RL1,FADD,FCER1A,FCER1G,FCER2,FGR,FOXP3,FZD5,GAB2,GATA3,HLA-A,HLA-B,HLA-E,HPX,HSPD1,IFNG,IL12A,IL12RB1,IL1B,IL23A,IL4R,KLRC4-KLRK1,KLRK1,LAG3,LAMP1,LTA,MALT1,MAP3K7,MSH6,NCR3,NLRP3,NOS2,P2RX7,PAXIP1,PRKCZ,PTAFR,PVR,RASGRP1,RSAD2,SASH3,SH2D1A,SH2D1B,SLAMF6,SNX4,STAP1,STAT5B,STAT6,STX4,STX7,SYK,TBX21,TNF,TNFSF13,TNFSF4,TRAF2,TRAF6,…	Human
NCB-CB	_tstat	within each collection	BP: GO biological process	GO_CYTOKINE_MEDIATED_SIGNALING_PATHWAY	0.000686	0.00544918	-0.442845	-2.49916	0	392	CD40,B2M,PSMB8,IL15RA,TNFRSF14,PSMB9,TRIM25,PSME1,TRIM34,TNFSF13B,PSMB10,CAMK2D,IRF2,HLA-E,IL1RL2,IL20RA,OAS1,IRF1,IFI35,CCR1,AIM2,IL4R,IL13RA1,LIFR,CD74,HLA-F,TRIM21,CCL4L2,BIRC3,CCL24,IRAK2,PSMA4,CCL3,BST2,TRADD,HLA-A,XAF1,TRIM31,CSF1,GP1BA,HLA-C,TNFRSF13B,TNFSF12,IL27RA,HLA-B,HLA-DPA1,HLA-DRA,CIITA,IL17REL,IFIT3,LTA,STAT5A,IRF8,IL17RA,MX1,LTB,SOCS2,IFITM1,MAP3K14,CSF1R,IRF5,OAS3,JAK1,CMKLR1,OA…	202	0.515306	ACSL1,ADAM17,ADAR,ADIPOQ,ADIPOR1,ADIPOR2,AIM2,ASPN,B2M,BAD,BAG4,BBS2,BBS4,BGN,BIRC2,BIRC3,BST2,CAMK2A,CAMK2B,CAMK2D,CAMK2G,CARD14,CCL11,CCL13,CCL14,CCL15,CCL16,CCL18,CCL19,CCL2,CCL20,CCL21,CCL22,CCL23,CCL24,CCL3,CCL4,CCL4L2,CCL5,CCL7,CCL8,CCR1,CCR10,CCR2,CCR3,CCR4,CCR5,CCR6,CCR7,CCR8,CCRL2,CD27,CD40,CD40LG,CD44,CD70,CD74,CEBPA,CHAD,CIB1,CIITA,CISH,CLCF1,CMKLR1,CNTF,CNTFR,COMMD7,CSF1,CSF1R,CSF2RA,…	Human
NCB-CB	_tstat	within each collection	BP: GO biological process	GO_REGULATION_OF_CELL_ACTIVATION	0.000709	0.00546749	-0.438163	-2.49419	0	431	CD40,TNFRSF14,HLA-DOA,ATP11C,BST1,NR1H3,TNFSF13B,HFE,VAV1,PRKCQ,CASP3,FES,HLA-E,IL1RL2,IRF1,CCDC88B,FLT3LG,CD274,PRR5,IL4R,TNFAIP8L2,BANK1,CYLD,LILRB1,VAMP8,CD74,CD28,BTK,RASGRP1,TRAC,PDCD1LG2,IL15,STAP1,HLA-A,TNFRSF13B,IL10,IL27RA,CARD11,TBX21,NFATC2,HLA-DPA1,MILR1,HLA-DRA,LAT,PLEK,NCKAP1L,CD86,AIF1,VAMP7,NKAP,IGLL5,HAVCR2,SIT1,NOS3,SIRPG,FCER1G,CD209,TIRAP,CD4,ZAP70,TRDC,SAMSN1,MAP3K14,CSK,CD84…	226	0.524362	ABAT,ABR,ADA,ADAM8,ADAMTS18,ADK,ADORA2B,ADRB2,AGER,AHR,AIF1,AKT1,ANXA1,AP1G1,AP3B1,AP3D1,APLF,APOE,ATM,ATP11C,AXL,BAD,BANK1,BCL10,BCL2,BCL6,BCR,BLOC1S3,BMP4,BST1,BTK,BTLA,BTN2A2,C12orf4,C1QTNF1,CAMK4,CAPN3,CARD11,CASP3,CAV1,CCDC88B,CCL19,CCL2,CCL21,CCL5,CCR2,CCR7,CD1D,CD2,CD209,CD226,CD24,CD244,CD247,CD27,CD274,CD276,CD28,CD300A,CD38,CD3D,CD3E,CD3G,CD4,CD40,CD40LG,CD46,CD47,CD5,CD55,CD59,CD6,CD74…	Human
NCB-CB	_tstat	within each collection	BP: GO biological process	GO_POSITIVE_REGULATION_OF_T_CELL_PROLIFERATION	0.000495	0.00530695	-0.553272	-2.49242	0	83	PRKCQ,HLA-E,CCDC88B,CD274,CD28,PDCD1LG2,IL15,HLA-A,CARD11,HLA-DPA1,NCKAP1L,CD86,AIF1,HAVCR2,CD4,ZAP70,SASH3,CD80,IL12RB1,RIPK2,HLA-DMB,HLA-DPB1,LILRB2,SLAMF1,IL1B,PTPRC,RASAL3,IL18,CD6,EBI3,CD40LG,VCAM1,CD3E,IL2RA,CORO1A,SPN,CD1D,ADK,CCR2,AGER,PYCARD,FOXP3,CCL5,JAK3,CD244,LGALS9,IL23A,DNAJA3,STAT5B	49	0.590361	ADK,AGER,AIF1,ANXA1,CARD11,CCDC88B,CCL19,CCL5,CCR2,CD1D,CD24,CD244,CD274,CD276,CD28,CD3E,CD4,CD40LG,CD46,CD55,CD59,CD6,CD80,CD86,CORO1A,DHPS,DNAJA3,EBI3,EFNB1,EPO,FADD,FOXP3,GPAM,HAVCR2,HES1,HLA-A,HLA-DMB,HLA-DPA1,HLA-DPB1,HLA-E,HMGB1,ICOSLG,IFNG,IGF1,IGF2,IGFBP2,IL12A,IL12RB1,IL15,IL18,IL1B,IL23A,IL2RA,IL6,IL6ST,JAK3,LGALS9,LILRB2,NCK1,NCK2,NCKAP1L,PDCD1LG2,PNP,PRKCQ,PTPRC,PYCARD,RASAL3,RIPK2,SA…	Human
NCB-CB	_tstat	within each collection	BP: GO biological process	GO_REGULATION_OF_ADAPTIVE_IMMUNE_RESPONSE	0.000507	0.00530695	-0.520047	-2.47694	0	110	CD40,B2M,HFE,PRKCQ,HLA-E,IRF1,IL4R,LILRB1,CD28,NCR3,BTK,HLA-A,IL10,IL27RA,TBX21,HLA-B,FCER2,LTA,HAVCR2,FCER1G,WAS,CD4,SAMSN1,IL33,ADA,SASH3,DUSP10,CD80,IL12RB1,RIPK2,RIPK3,MEF2C,SLAMF1,IL1B,PTPRC,P2RX7,CR1,SPN,CCR2,HLX,NLRP3,AGER,PYCARD,FOXP3,STAT6,FZD5,JAK3,PTPN6,EIF2AK4,RSAD2,IL23A,IL27,IRF7,TNFAIP3,TNF,IL7R,CCL19,IFNG,PAXIP1,CD226	60	0.545455	ADA,AGER,ANXA1,APLF,B2M,BCL6,BTK,C3,C4BPA,C4BPB,CCL19,CCR2,CD226,CD28,CD4,CD40,CD80,CEACAM1,CLCF1,CLEC4G,CR1,DUSP10,DUSP22,EIF2AK4,EXOSC3,FADD,FCER1A,FCER1G,FCER2,FOXJ1,FOXP3,FZD5,GATA3,HAVCR2,HFE,HLA-A,HLA-B,HLA-E,HLX,HMGB1,HPX,HSPD1,IFNG,IL10,IL12A,IL12RB1,IL1B,IL1RL1,IL20RB,IL23A,IL27,IL27RA,IL33,IL4R,IL6ST,IL7R,IRF1,IRF7,JAK3,LILRB1,LTA,MALT1,MAP3K7,MEF2C,MSH6,NCR3,NDFIP1,NLRP3,P2RX7,PAXIP1,P…	Human
NCB-CB	_tstat	within each collection	BP: GO biological process	GO_REGULATION_OF_LEUKOCYTE_MEDIATED_CYTOTOXICITY	0.000463	0.00530695	-0.6148	-2.47343	0	47	B2M,VAV1,HLA-E,LILRB1,NCR3,RASGRP1,TAP1,STAP1,HLA-A,HLA-B,HAVCR2,CRTAM,SERPINB9,IL12RB1,SLAMF6,KLRK1,RIPK3,PTPRC,P2RX7,NOS2,SH2D1A,LAG3,PIK3R6,AGER,LAMP1,ARRB2,KLRC4-KLRK1,LGALS9,IL23A,STAT5B,AP1G1,IL7R,CD226,NCR1,FADD	35	0.744681	AGER,AP1G1,ARRB2,B2M,CADM1,CCL2,CD226,CEACAM1,CRTAM,F2RL1,FADD,HAVCR2,HLA-A,HLA-B,HLA-E,ICAM1,IGF2,IL12A,IL12RB1,IL23A,IL7R,KLRC4-KLRK1,KLRK1,LAG3,LAMP1,LGALS9,LILRB1,MICA,NCR1,NCR3,NOS2,P2RX7,PIK3R6,PPP3CB,PTPRC,PVR,RASGRP1,RIPK3,SERPINB9,SH2D1A,SLAMF6,STAP1,STAT5B,STX7,TAP1,VAV1,XCL1	Human
NCB-CB	_tstat	within each collection	BP: GO biological process	GO_POSITIVE_REGULATION_OF_LYMPHOCYTE_DIFFERENTIATION	0.000484	0.00530695	-0.563707	-2.46419	0	71	ATP11C,IL1RL2,FLT3LG,IL4R,CD74,BTK,RASGRP1,IL15,NCKAP1L,CD86,NKAP,ZAP70,ADA,SASH3,CD80,IL12RB1,RIPK2,RAG1,LILRB2,IL1B,PPP2R3C,INPP5D,XBP1,CD27,BAD,IL7,AXL,IL2RA,HLX,HLA-G,NLRP3,AP3D1,PIK3R6,FOXP3,ADAM8,LGALS9,IL23A,STAT5B,IL7R,CCL19,TGFBR2,IFNG,PRDM1,TNFSF9	44	0.619718	ADA,ADAM8,ANXA1,AP3B1,AP3D1,ATP11C,AXL,BAD,BTK,CCL19,CD27,CD46,CD74,CD80,CD83,CD86,EGR3,FLT3LG,FOXP3,GAS6,GATA3,GLI2,GLI3,HLA-G,HLX,IFNG,IHH,IL12A,IL12RB1,IL15,IL1B,IL1RL2,IL23A,IL2RA,IL4R,IL6,IL7,IL7R,INPP5D,ITPKB,LGALS9,LILRB2,MMP14,MYB,NCKAP1L,NKAP,NLRP3,PCID2,PIK3R6,PNP,PPP2R3C,PRDM1,PRKCZ,RAG1,RARA,RASGRP1,RIPK2,SART1,SASH3,SHH,SOCS5,STAT5B,SYK,TGFBR2,TNFSF4,TNFSF9,VNN1,XBP1,ZAP70,ZBTB1,ZBTB…	Human
NCB-CB	_tstat	within each collection	BP: GO biological process	GO_LEUKOCYTE_ACTIVATION	0.000678	0.00544918	-0.440159	-2.45658	0	361	SNAP23,NBN,CD40,B2M,RAB27A,BATF2,ATP11C,NHEJ1,LYL1,NTRK1,PSMB10,VAV1,CASP8,HLA-E,MICB,POU2F2,IRF1,FLT3LG,LAT2,TLR1,BANK1,STK11,LILRB1,VAMP8,CD74,CD28,BTK,RASGRP1,CCL3,BST2,AKAP17A,IL15,CSF1,IL10,CARD11,TBX21,MILR1,SMAD3,LAT,HHEX,APBB1IP,CD180,BATF3,HPRT1,CD86,AIF1,VAMP7,NKAP,HAVCR2,FCER1G,TCF7,BATF,WAS,CD4,ZAP70,FNIP1,SH2D1B,BTN3A1,MS4A1,CRTAM,ITK,DOCK8,CD3D,PI4K2A,ADA,TNFSF8,ITGB2,ITGAL,PTPN22,L…	175	0.484765	ABL1,ADA,ADAM10,ADAM17,ADAM9,AIF1,AKAP17A,ANXA1,ANXA3,APBB1IP,ATG5,ATM,ATP11C,ATP7A,AXL,AZI2,B2M,BAK1,BANK1,BATF,BATF2,BATF3,BAX,BCL11B,BCL2,BCL3,BCL6,BLNK,BMX,BRAF,BST2,BTK,BTN3A1,CADM1,CAMK4,CARD11,CASP8,CBFB,CCL19,CCL21,CCL3,CCL5,CCND3,CCR7,CD151,CD180,CD1C,CD1D,CD2,CD244,CD276,CD28,CD3D,CD3E,CD3G,CD4,CD40,CD40LG,CD6,CD7,CD74,CD79A,CD79B,CD80,CD86,CD8A,CD8B,CD93,CDK6,CEBPB,CEBPG,CHD7,CHGA,CHRN…	Human
NCB-CB	_tstat	within each collection	BP: GO biological process	GO_REGULATION_OF_LEUKOCYTE_PROLIFERATION	0.000573	0.00532009	-0.477954	-2.45114	0	180	CD40,TNFRSF14,BST1,TNFSF13B,PRKCQ,CASP3,HLA-E,IRF1,CCDC88B,FLT3LG,CD274,LILRB1,CD74,CD28,PDCD1LG2,IL15,HLA-A,CSF1,TNFRSF13B,IL10,CARD11,NFATC2,HLA-DPA1,NCKAP1L,CD86,AIF1,HAVCR2,CD209,TIRAP,CD4,ZAP70,ADA,PTPN22,TLR4,SASH3,RAC2,CD80,IL12RB1,CD300A,RIPK2,HLA-DMB,HLA-DPB1,ITCH,RIPK3,MEF2C,LILRB2,SLAMF1,IL1B,BTN2A2,PTPRC,INPP5D,RASAL3,IL18,SFTPD,CD6,EBI3,CD40LG,PLA2G2D,VCAM1,IL7,CCL8,CD3E,IL2RA,CORO1A…	90	0.5	ADA,ADK,AGER,AHR,AIF1,ANXA1,ATM,BCL2,BCL6,BMP4,BST1,BTN2A2,CARD11,CASP3,CCDC88B,CCL19,CCL5,CCL8,CCR2,CD1D,CD209,CD24,CD244,CD274,CD276,CD28,CD300A,CD38,CD3E,CD4,CD40,CD40LG,CD46,CD55,CD59,CD6,CD74,CD80,CD81,CD86,CDKN1A,CDKN2A,CEBPB,CLCF1,CLEC4G,CORO1A,CSF1,CTLA4,CTNNB1,DHPS,DLG1,DNAJA3,EBI3,EFNB1,EPO,ERBB2,FADD,FGF10,FLT3LG,FOXJ1,FOXP3,GAL,GLMN,GNRH1,GPAM,GPR183,GREM1,GSTP1,HAVCR2,HES1,HLA-A,HLA-…	Human
NCB-CB	_tstat	within each collection	BP: GO biological process	GO_LYMPHOCYTE_MIGRATION	0.00045	0.00530695	-0.627225	-2.44903	0	41	CCL4L2,CCL24,CCL3,TBX21,ZAP70,MYO1G,CXCL11,CCR7,CKLF,PIK3CG,CCL8,XCL2,CCR2,CCL21,ITGB7,ADAM8,S1PR1,CCL5,CCL23,CXCL13,CX3CL1,CXCR3,CCL13,CCL18,CCL19,CXCL10	26	0.634146	ADAM8,ARTN,CCL11,CCL13,CCL14,CCL15,CCL16,CCL18,CCL19,CCL2,CCL20,CCL21,CCL22,CCL23,CCL24,CCL3,CCL4L2,CCL5,CCL8,CCR2,CCR7,CKLF,CX3CL1,CXCL10,CXCL11,CXCL13,CXCL16,CXCR3,GAS6,GATA3,ITGB7,MYO1G,PIK3CD,PIK3CG,RET,S1PR1,SAA1,TBX21,XCL1,XCL2,ZAP70	Human
NCB-CB	_tstat	within each collection	BP: GO biological process	GO_REGULATION_OF_INTERFERON_GAMMA_PRODUCTION	0.000488	0.00530695	-0.537984	-2.43587	0	84	CD274,LILRB1,TICAM2,RASGRP1,PDCD1LG2,HLA-A,IL10,IL27RA,HLA-DPA1,LTA,IRF8,HAVCR2,IL33,PTPN22,TLR4,SASH3,IFNAR1,IL12RB1,RIPK2,SLAMF6,HLA-DPB1,KLRK1,RIPK3,SLAMF1,TXK,IL1B,TLR8,CCR7,BCL3,IL18,CD14,EBI3,AXL,CD3E,CCR2,TLR7,PYCARD,FOXP3,FZD5,KLRC4-KLRK1,CD244,SCGB1A1,TLR3,LGALS9,IL23A,CD2,IL27,ISG15,ZC3H12A	49	0.583333	ABL1,AXL,BCL3,C1QBP,CCR2,CCR7,CD14,CD2,CD244,CD274,CD276,CD3E,CEBPG,EBI3,FADD,FOXP3,FZD5,GAS6,GATA3,HAVCR2,HLA-A,HLA-DPA1,HLA-DPB1,HLA-DRB1,HLA-DRB5,HMGB1,HRAS,HSPD1,IFNAR1,IL10,IL12A,IL12RB1,IL12RB2,IL18,IL18R1,IL1B,IL1RL1,IL20RB,IL23A,IL27,IL27RA,IL33,INHA,INHBA,IRF8,ISG15,KLRC4-KLRK1,KLRK1,LGALS9,LILRB1,LTA,NR1H4,PDCD1LG2,PDE4B,PDE4D,PGLYRP2,PRNP,PTPN22,PYCARD,RARA,RASGRP1,RIPK2,RIPK3,SASH3,SC…	Human
NCB-CB	_tstat	within each collection	BP: GO biological process	GO_POSITIVE_REGULATION_OF_INTERFERON_GAMMA_PRODUCTION	0.000482	0.00530695	-0.582774	-2.42646	0	57	TICAM2,RASGRP1,HLA-A,IL27RA,HLA-DPA1,LTA,IRF8,HAVCR2,PTPN22,TLR4,SASH3,IFNAR1,IL12RB1,RIPK2,SLAMF6,HLA-DPB1,KLRK1,SLAMF1,TXK,IL1B,TLR8,BCL3,IL18,CD14,EBI3,CD3E,CCR2,TLR7,PYCARD,FZD5,KLRC4-KLRK1,CD244,TLR3,LGALS9,IL23A,CD2,IL27	37	0.649123	ABL1,BCL3,CCR2,CD14,CD2,CD244,CD276,CD3E,CEBPG,EBI3,FADD,FZD5,HAVCR2,HLA-A,HLA-DPA1,HLA-DPB1,HRAS,HSPD1,IFNAR1,IL12A,IL12RB1,IL12RB2,IL18,IL18R1,IL1B,IL23A,IL27,IL27RA,IRF8,KLRC4-KLRK1,KLRK1,LGALS9,LTA,PDE4B,PDE4D,PTPN22,PYCARD,RASGRP1,RIPK2,SASH3,SLAMF1,SLAMF6,SLC11A1,TICAM2,TLR3,TLR4,TLR7,TLR8,TLR9,TNF,TNFRSF13C,TNFSF4,TNFSF9,TXK,WNT5A,ZFPM1,ZP3	Human
NCB-CB	_tstat	within each collection	BP: GO biological process	GO_LYMPHOCYTE_COSTIMULATION	0.00049	0.00530695	-0.55298	-2.419	0	72	TNFRSF14,VAV1,CD274,PRR5,CD28,TRAC,PDCD1LG2,CARD11,HLA-DPA1,HLA-DRA,CD86,CD4,MAP3K14,CSK,CD3D,CD247,LCK,CD80,HLA-DPB1,KLRK1,BTLA,DPP4,CD40LG,CD3E,TRBC1,SPN,CD5,RICTOR,CCL21,LYN,CAV1,TNFSF14,PDCD1,GRAP2,CTLA4,ICOS,PTPN6,PIK3R1,KLRC4-KLRK1	39	0.541667	AKT1,BTLA,CARD11,CAV1,CCL19,CCL21,CD24,CD247,CD274,CD28,CD3D,CD3E,CD3G,CD4,CD40LG,CD5,CD80,CD86,CDC42,CSK,CTLA4,DPP4,EFNB1,EFNB2,EFNB3,FYN,GRAP2,GRB2,HLA-DPA1,HLA-DPB1,HLA-DQA1,HLA-DQA2,HLA-DQB1,HLA-DQB2,HLA-DRA,HLA-DRB1,HLA-DRB5,ICOS,ICOSLG,KLRC4-KLRK1,KLRK1,LCK,LGALS1,LYN,MAP3K14,MAP3K8,MAPKAP1,MLST8,MTOR,PAK1,PAK2,PAK3,PDCD1,PDCD1LG2,PDPK1,PIK3CA,PIK3R1,PRR5,PTPN11,PTPN6,RAC1,RICTOR,SPN,SRC,TN…	Human
NCB-CB	_tstat	within each collection	BP: GO biological process	GO_REGULATION_OF_LYMPHOCYTE_MEDIATED_IMMUNITY	0.000502	0.00530695	-0.517419	-2.41847	0	100	CD40,B2M,HFE,VAV1,HLA-E,LILRB1,CD28,NCR3,BTK,RASGRP1,TAP1,HLA-A,IL10,IL27RA,TBX21,HLA-B,FCER2,LTA,HAVCR2,FCER1G,WAS,SH2D1B,CRTAM,SERPINB9,SASH3,IL12RB1,SLAMF6,KLRK1,RIPK3,SLAMF1,IL1B,PTPRC,P2RX7,CR1,SH2D1A,SPN,LAG3,NLRP3,PIK3R6,AGER,LAMP1,FOXP3,STAT6,ARRB2,FZD5,PTPN6,KLRC4-KLRK1,RSAD2,LGALS9,IL23A,STAT5B,TNF,AP1G1,IL7R,IFNG,PAXIP1,CD226	57	0.57	AGER,AP1G1,APLF,ARRB2,B2M,BCL6,BTK,C3,C4BPA,C4BPB,CADM1,CD226,CD28,CD40,CEACAM1,CLCF1,CLEC4G,CR1,CRTAM,DUSP22,EXOSC3,FADD,FCER1A,FCER1G,FCER2,FOXJ1,FOXP3,FZD5,GATA3,HAVCR2,HFE,HLA-A,HLA-B,HLA-E,HMGB1,HPX,HSPD1,IFNG,IGF2,IL10,IL12A,IL12RB1,IL1B,IL20RB,IL23A,IL27RA,IL7R,KLRC4-KLRK1,KLRK1,LAG3,LAMP1,LGALS9,LILRB1,LTA,MALT1,MAP3K7,MICA,MSH6,NCR1,NCR3,NDFIP1,NLRP3,P2RX7,PAXIP1,PIK3R6,PPP3CB,PRKCZ,PTPN…	Human
NCB-CB	_tstat	within each collection	BP: GO biological process	GO_REGULATION_OF_ALPHA_BETA_T_CELL_ACTIVATION	0.000481	0.00530695	-0.564647	-2.41701	0	64	TNFRSF14,HFE,PRKCQ,HLA-E,IRF1,IL4R,LILRB1,CD28,HLA-A,NCKAP1L,CD86,NKAP,ZAP70,ADA,SASH3,CD80,IL12RB1,CD300A,RIPK2,ITCH,RASAL3,IL18,EBI3,CD3E,CCR2,HLX,NLRP3,AP3D1,AGER,IRF4,FOXP3,JAK3,CD244,LGALS9,IL23A,IL27,CCL19,TGFBR2,IFNG	39	0.609375	ADA,AGER,ANXA1,AP3B1,AP3D1,BCL6,CCL19,CCR2,CD244,CD28,CD300A,CD3E,CD55,CD80,CD83,CD86,EBI3,FOXP3,GATA3,GLI3,HFE,HLA-A,HLA-E,HLX,HMGB1,HSPH1,IFNG,IHH,IL12A,IL12RB1,IL18,IL23A,IL27,IL4R,IL6,IRF1,IRF4,ITCH,ITPKB,JAK3,LGALS9,LILRB1,MYB,NCKAP1L,NKAP,NLRP3,PNP,PRKCQ,PRKCZ,RARA,RASAL3,RC3H1,RIPK2,SASH3,SHH,SOCS5,SYK,TGFBR2,TNFRSF14,TNFSF18,TNFSF4,XCL1,ZAP70,ZBTB16	Human
NCB-CB	_tstat	within each collection	BP: GO biological process	GO_POSITIVE_REGULATION_OF_CELL_KILLING	0.000449	0.00530695	-0.644301	-2.41381	0	35	B2M,VAV1,HLA-E,NCR3,RASGRP1,STAP1,HLA-A,HLA-B,FCER2,CRTAM,IL12RB1,SLAMF6,KLRK1,P2RX7,NOS2,BAD,SH2D1A,CCR2,LAG3,LAMP1,KLRC4-KLRK1,IL23A,STAT5B,AP1G1,IFNG,CD226,FADD	27	0.771429	AP1G1,B2M,BAD,BCL2L11,CADM1,CCL2,CCR2,CD226,CRTAM,F2RL1,FADD,FCER2,HLA-A,HLA-B,HLA-E,IFNG,IL12A,IL12RB1,IL23A,KLRC4-KLRK1,KLRK1,LAG3,LAMP1,NCR3,NOS2,P2RX7,PVR,RASGRP1,SH2D1A,SLAMF6,STAP1,STAT5B,STX7,VAV1,XCL1	Human
NCB-CB	_tstat	within each collection	BP: GO biological process	GO_LYMPHOCYTE_ACTIVATION	0.000638	0.00533609	-0.440902	-2.41254	0	300	NBN,CD40,B2M,RAB27A,ATP11C,NHEJ1,LYL1,NTRK1,PSMB10,VAV1,CASP8,HLA-E,MICB,POU2F2,IRF1,FLT3LG,LAT2,BANK1,STK11,LILRB1,CD74,CD28,BTK,BST2,AKAP17A,IL15,IL10,CARD11,TBX21,SMAD3,LAT,HHEX,APBB1IP,CD180,HPRT1,CD86,VAMP7,NKAP,FCER1G,TCF7,BATF,WAS,CD4,ZAP70,FNIP1,BTN3A1,MS4A1,CRTAM,ITK,DOCK8,CD3D,ADA,TNFSF8,ITGB2,ITGAL,PTPN22,LCK,SATB1,TLR4,MFNG,DOCK2,ITGA4,NFAM1,THEMIS,IFNAR1,CD80,RIPK2,FLT3,SLAMF6,SPI1,L…	147	0.49	ABL1,ADA,ADAM17,AKAP17A,ANXA1,APBB1IP,ATG5,ATM,ATP11C,ATP7A,AXL,AZI2,B2M,BAK1,BANK1,BATF,BAX,BCL11B,BCL2,BCL3,BCL6,BLNK,BMX,BRAF,BST2,BTK,BTN3A1,CADM1,CARD11,CASP8,CBFB,CCL19,CCL21,CCND3,CCR7,CD151,CD180,CD1C,CD1D,CD2,CD244,CD276,CD28,CD3D,CD3E,CD3G,CD4,CD40,CD40LG,CD6,CD7,CD74,CD79A,CD79B,CD80,CD86,CD8A,CD8B,CDK6,CEBPB,CEBPG,CHD7,CHRNA4,CLCF1,CLEC4E,CLEC7A,CMTM7,CORO1A,CR2,CRTAM,CTNNB1,CXADR,CXC…	Human
NCB-CB	_tstat	within each collection	BP: GO biological process	GO_POSITIVE_REGULATION_OF_LYMPHOCYTE_MEDIATED_IMMUNITY	0.000476	0.00530695	-0.567178	-2.4123	0	61	CD40,B2M,VAV1,HLA-E,CD28,NCR3,RASGRP1,HLA-A,TBX21,HLA-B,FCER2,LTA,FCER1G,SH2D1B,CRTAM,SASH3,IL12RB1,SLAMF6,KLRK1,IL1B,P2RX7,SH2D1A,LAG3,NLRP3,LAMP1,FOXP3,STAT6,FZD5,KLRC4-KLRK1,RSAD2,IL23A,STAT5B,TNF,AP1G1,IFNG,PAXIP1,CD226	37	0.606557	AP1G1,B2M,C3,CADM1,CD226,CD28,CD40,CLCF1,CRTAM,EXOSC3,FADD,FCER1A,FCER1G,FCER2,FOXP3,FZD5,GATA3,HLA-A,HLA-B,HLA-E,HPX,HSPD1,IFNG,IL12A,IL12RB1,IL1B,IL23A,KLRC4-KLRK1,KLRK1,LAG3,LAMP1,LTA,MALT1,MAP3K7,MSH6,NCR3,NLRP3,P2RX7,PAXIP1,PRKCZ,PVR,RASGRP1,RSAD2,SASH3,SH2D1A,SH2D1B,SLAMF6,STAT5B,STAT6,STX7,TBX21,TNF,TNFSF13,TNFSF4,TRAF2,TRAF6,UNG,VAV1,XCL1,ZBTB1,ZP3	Human
NCB-CB	_tstat	within each collection	BP: GO biological process	GO_REGULATION_OF_INNATE_IMMUNE_RESPONSE	0.000641	0.00533609	-0.436369	-2.40036	0	316	NFKB1,PSMB8,PSMB9,ZC3HAV1,XIAP,PSME1,NR1H3,PSMB10,VAV1,CASP8,HLA-E,IRF1,ICAM2,TLR1,AIM2,CYLD,PIAS1,LILRB1,TNIP1,TICAM2,BIRC3,NCR3,MYD88,BTK,NLRX1,RASGRP1,IRAK2,PSMA4,TAP1,PIK3AP1,HLA-A,CARD11,HLA-B,LY96,CD180,DHX58,CD86,TLR6,HAVCR2,CLEC4A,FCER1G,CD209,TIRAP,CTSS,SH2D1B,CRTAM,ITGAM,PRKACB,JAK1,NLRC5,ERAP1,RPS6KA3,PSMA5,FGR,SERPINB9,FBXW11,ITGB2,PTPN22,NMI,IFNAR2,TLR4,NOD2,TNIP3,DUSP10,NR1D1,UBE2D3…	165	0.522152	A2M,ADAM8,ADAR,AIM2,ANKRD17,AP1G1,ARRB2,BCL10,BIRC2,BIRC3,BTK,BTRC,C1QBP,CADM1,CARD11,CARD9,CASP8,CAV1,CCL5,CD14,CD180,CD1D,CD209,CD226,CD36,CD86,CDC37,CHUK,CLEC4A,CLEC4C,CLEC4E,CLEC6A,CLEC7A,CNPY3,COCH,COLEC12,CR1,CREBBP,CRTAM,CTSB,CTSK,CTSS,CUL1,CYBA,CYLD,DAB2IP,DDX58,DDX60,DHX58,DMBT1,DNAJA3,DRD2,DUSP10,EP300,ERAP1,EREG,F2RL1,FADD,FBXW11,FCER1G,FCN1,FGR,FLOT1,FLOT2,FYN,GBP5,GFI1,HAVCR2,HCK,HLA…	Human
NCB-CB	_tstat	within each collection	BP: GO biological process	GO_REGULATION_OF_HOMOTYPIC_CELL_CELL_ADHESION	0.000623	0.00533609	-0.441245	-2.39551	0	274	TNFRSF14,HLA-DOA,HFE,VAV1,PRKCQ,CASP3,HLA-E,IL1RL2,IRF1,CCDC88B,CD274,PRR5,IL4R,TNFAIP8L2,CYLD,LILRB1,CD74,CD28,RDX,RASGRP1,TRAC,PDCD1LG2,IL15,HLA-A,IL10,CARD11,HLA-DPA1,HLA-DRA,LAT,NCKAP1L,CD86,AIF1,NKAP,HAVCR2,SIT1,SIRPG,CD209,CD4,ZAP70,MAP3K14,CSK,CD3D,ADA,CD247,PTPN22,LCK,SASH3,NOD2,RAC2,CD80,IL12RB1,CD300A,RIPK2,HLA-DMB,SOX13,HLA-DPB1,KLRK1,ITCH,RIPK3,RAG1,LILRB2,SLAMF1,IL1B,BTN2A2,PTPRC,XBP…	125	0.456204	ABAT,ADA,ADAM8,ADAMTS18,ADK,ADRB2,AGER,AIF1,AKT1,ANK3,ANXA1,AP3B1,AP3D1,BAD,BCL10,BCL6,BMP4,BTLA,BTN2A2,C1QTNF1,CAMK4,CARD11,CASP3,CAV1,CCDC88B,CCL19,CCL2,CCL21,CCL5,CCR2,CCR7,CD1D,CD2,CD209,CD24,CD244,CD247,CD274,CD276,CD28,CD300A,CD3D,CD3E,CD3G,CD4,CD40LG,CD44,CD46,CD47,CD5,CD55,CD59,CD6,CD74,CD80,CD83,CD86,CDC42,CDKN2A,CEACAM1,CEBPB,CLEC4G,CLPTM1,CORO1A,CSK,CTLA4,CTNNB1,CYLD,CYP26B1,DHPS,DLG1,…	Human
NCB-CB	_tstat	within each collection	BP: GO biological process	GO_IMMUNE_RESPONSE_REGULATING_CELL_SURFACE_RECEPTOR_SIGNALING_PATHWAY	0.000639	0.00533609	-0.434736	-2.3842	0	305	MAPK9,CD40,NFKB1,PSMB8,SPG21,PSMB9,PSME1,PSMB10,VAV1,PRKCQ,MICB,IGLV7-43,LAT2,ICAM2,CD19,C3AR1,STK11,BLK,LILRB1,IGHV2-70,CD28,BTK,TRAC,PSMA4,CYFIP1,IGKV1D-33,CARD11,ELMO1,NFATC2,HLA-DPA1,HLA-DRA,IGKV3D-20,LAT,C5AR1,NCKAP1L,IGKV3D-11,IGLL5,TRAT1,CLEC4A,FCER1G,CD209,WAS,CD4,ZAP70,TRDC,BTN3A1,CSK,ITK,PRKACB,MYO1G,CD3D,SKAP1,PSMA5,FGR,FCGR3A,CD247,FBXW11,LCK,MYH2,NFAM1,THEMIS,FCN1,UBE2D1,RIPK2,IGLC1,…	156	0.511475	ABI1,ABL1,ACTB,ACTG1,ACTR2,ACTR3,ARPC1A,ARPC1B,ARPC2,ARPC3,ARPC4,ARPC5,BAIAP2,BAX,BCAR1,BCL10,BCL2,BLK,BRK1,BTK,BTN3A1,BTRC,C3AR1,C5AR1,CACNB3,CACNB4,CALM1,CALM2,CALM3,CARD11,CARD9,CD19,CD209,CD24,CD247,CD28,CD38,CD3D,CD3E,CD3G,CD4,CD40,CD79A,CD79B,CDC42,CHUK,CLEC4A,CLEC4C,CLEC4E,CLEC6A,CLEC7A,CR1,CR2,CREBBP,CRK,CSK,CTLA4,CUL1,CYFIP1,CYFIP2,DENND1B,DOCK1,ELMO1,ELMO2,EP300,FBXW11,FCER1A,FCER1G,FCG…	Human
NCB-CB	_tstat	within each collection	BP: GO biological process	GO_DEFENSE_RESPONSE_TO_VIRUS	0.000533	0.00530695	-0.483754	-2.37712	0	134	CD40,APOBEC3D,APOBEC3G,TRIM25,ZC3HAV1,TRIM34,OAS1,HERC5,IRF1,LILRB1,FAM111A,BST2,DEFA1,DHX58,CD86,IFIT3,C19orf66,IFIT5,APOBEC3F,MX1,IFITM1,IRF5,OAS3,OAS2,NLRC5,IL33,TRIM22,SLFN11,EIF2AK2,GBP1,IFNAR1,IL10RB,ITCH,IFIT2,APOBEC3C,TLR8,IFIT1,PTPRC,IFIH1,ISG20,IFI44L,DDX60,PRF1,UNC13D,LYST,TRIM56,NLRP3,TLR7,PLSCR1,PYCARD,CXCL9,ADARB1,RNASEL,DNAJC3,TRIM5,EIF2AK4,POLR3G,TLR3,PML,RSAD2,CD8A,RELA,IFI16,IL2…	81	0.604478	ABCC9,ABCF3,ADAR,ADARB1,AGBL4,AGBL5,AIMP1,APOBEC3A,APOBEC3B,APOBEC3C,APOBEC3D,APOBEC3F,APOBEC3G,ATG7,BCL2,BECN1,BNIP3,BNIP3L,BST2,C19orf66,CARD9,CD207,CD40,CD86,CD8A,CRCP,CXADR,CXCL10,CXCL9,DDIT4,DDX41,DDX58,DDX60,DEFA1,DHX58,DMBT1,DNAJC3,EIF2AK2,EIF2AK4,ELMOD2,EXOSC4,EXOSC5,F2RL1,FADD,FAM111A,FCN3,GBP1,GBP3,GPAM,HERC5,HYAL2,IFI16,IFI44L,IFIH1,IFIT1,IFIT2,IFIT3,IFIT5,IFITM1,IFITM2,IFITM3,IFNAR1,I…	Human
NCB-CB	_tstat	within each collection	BP: GO biological process	GO_REGULATION_OF_NATURAL_KILLER_CELL_MEDIATED_IMMUNITY	0.000447	0.00530695	-0.658144	-2.3743	0	30	VAV1,HLA-E,LILRB1,NCR3,RASGRP1,TAP1,HLA-A,HLA-B,HAVCR2,SH2D1B,CRTAM,SERPINB9,SLAMF6,KLRK1,SH2D1A,LAG3,PIK3R6,LAMP1,ARRB2,KLRC4-KLRK1,LGALS9,STAT5B,AP1G1,CD226,NCR1	25	0.833333	AP1G1,ARRB2,CADM1,CD226,CRTAM,HAVCR2,HLA-A,HLA-B,HLA-E,IGF2,IL12A,KLRC4-KLRK1,KLRK1,LAG3,LAMP1,LGALS9,LILRB1,MICA,NCR1,NCR3,PIK3R6,PVR,RASGRP1,SERPINB9,SH2D1A,SH2D1B,SLAMF6,STAT5B,TAP1,VAV1	Human
NCB-CB	_tstat	within each collection	BP: GO biological process	GO_POSITIVE_REGULATION_OF_DEFENSE_RESPONSE	0.00065	0.00537433	-0.429687	-2.37179	0	327	NFKB1,PSMB8,PSMB9,ZC3HAV1,PSME1,GPSM3,PSMB10,VAV1,CASP8,HLA-E,CLOCK,ICAM2,TLR1,AIM2,CYLD,VAMP8,TNIP1,TICAM2,CCL4L2,BIRC3,CCL24,CD28,NCR3,MYD88,BTK,RASGRP1,IRAK2,PSMA4,CCL3,IL15,PIK3AP1,CARD11,LY96,CD180,DHX58,CD86,TLR6,LTA,VAMP7,HAVCR2,IL17RA,CLEC4A,FCER1G,CD209,TIRAP,CTSS,SH2D1B,CRTAM,ITGAM,PRKACB,NLRC5,IL33,RPS6KA3,PSMA5,FBXW11,ITGB2,TLR4,NOD2,TNIP3,TNFRSF11A,ETS1,UBE2D3,FCN1,UBE2D1,RIPK2,SLAMF…	167	0.510703	ADAM8,ADORA2B,AGER,AGT,AGTR1,AIM2,ANKRD17,AP1G1,BCL10,BIRC2,BIRC3,BTK,BTRC,C3,CADM1,CARD11,CARD9,CASP8,CCL11,CCL13,CCL14,CCL15,CCL16,CCL18,CCL2,CCL23,CCL24,CCL3,CCL4,CCL4L2,CCL5,CCL7,CCL8,CCR2,CCR7,CD14,CD180,CD1D,CD209,CD226,CD28,CD36,CD47,CD6,CD86,CDK19,CHUK,CLEC4A,CLEC4C,CLEC4E,CLEC6A,CLEC7A,CLOCK,CNPY3,CNR1,COCH,COLEC12,CREB3L3,CREBBP,CRTAM,CTSB,CTSK,CTSS,CUL1,CX3CL1,CYBA,CYLD,DDX58,DDX60,DHX…	Human
NCB-CB	_tstat	within each collection	BP: GO biological process	GO_POSITIVE_REGULATION_OF_B_CELL_ACTIVATION	0.000487	0.00530695	-0.536975	-2.36367	0	74	CD40,ATP11C,BST1,TNFSF13B,CD74,CD28,BTK,CARD11,TBX21,NFATC2,NCKAP1L,IGLL5,TIRAP,ZAP70,TRDC,ADA,TLR4,SASH3,NOD2,IGLC1,MEF2C,IGHG1,PTPRC,PPP2R3C,INPP5D,XBP1,CD27,BAD,IGHG4,IL7,IGLC3,TNFRSF4,IGKC,IGLC2,GPR183,CD38	36	0.486486	ADA,ATP11C,BAD,BCL2,BCL6,BST1,BTK,CARD11,CD27,CD28,CD38,CD40,CD74,CD81,CDKN1A,CLCF1,EXOSC3,GPR183,IFNG,IGHA1,IGHA2,IGHD,IGHE,IGHG1,IGHG2,IGHG3,IGHG4,IGHM,IGHV3-23,IGKC,IGLC1,IGLC2,IGLC3,IGLC7,IGLL5,IL6,IL7,INPP5D,IRS2,MEF2C,MIF,MMP14,MSH6,NCKAP1L,NFATC2,NOD2,PAXIP1,PCID2,PELI1,PPP2R3C,PRDM1,PTPRC,SASH3,SLC39A10,STAT5B,STAT6,SYK,TBX21,TCF3,TICAM1,TIRAP,TLR4,TNFRSF13C,TNFRSF4,TNFSF13,TNFSF13B,TNFSF…	Human
NCB-CB	_tstat	within each collection	BP: GO biological process	GO_POSITIVE_REGULATION_OF_ADAPTIVE_IMMUNE_RESPONSE	0.000481	0.00530695	-0.55031	-2.36264	0	65	CD40,B2M,PRKCQ,HLA-E,CD28,NCR3,HLA-A,IL27RA,TBX21,HLA-B,FCER2,LTA,FCER1G,CD4,ADA,SASH3,CD80,IL12RB1,RIPK2,IL1B,P2RX7,CCR2,HLX,NLRP3,PYCARD,FOXP3,STAT6,FZD5,EIF2AK4,RSAD2,IL23A,TNF,CCL19,IFNG,PAXIP1,CD226	36	0.553846	ADA,ANXA1,B2M,C3,CCL19,CCR2,CD226,CD28,CD4,CD40,CD80,CLCF1,EIF2AK4,EXOSC3,FADD,FCER1A,FCER1G,FCER2,FOXP3,FZD5,GATA3,HLA-A,HLA-B,HLA-E,HLX,HPX,HSPD1,IFNG,IL12A,IL12RB1,IL1B,IL23A,IL27RA,IL6ST,LTA,MALT1,MAP3K7,MSH6,NCR3,NLRP3,P2RX7,PAXIP1,PRKCQ,PRKCZ,PVR,PYCARD,RIPK2,RSAD2,SASH3,SIRT1,SLC11A1,SOCS5,STAT6,STX7,TBX21,TNF,TNFRSF13C,TNFSF13,TNFSF4,TRAF2,TRAF6,UNG,XCL1,ZBTB1,ZP3	Human
NCB-CB	_tstat	within each collection	BP: GO biological process	GO_REGULATION_OF_INTERLEUKIN_12_PRODUCTION	0.000465	0.00530695	-0.584634	-2.359	0	48	CD40,NFKB1,IRF1,LILRB1,ACP5,IL10,HLA-B,IRF8,LTB,TIRAP,MAPK14,IRF5,CMKLR1,TLR4,RIPK2,TLR2,SLAMF1,CCR7,CD40LG,MAPK11,HLA-G,CD36,TNFRSF9,AGER,TIGIT,ARRB2,JAK3,TLR3,RELA,LGALS9,IL23A	31	0.645833	ACP5,AGER,ARRB2,C1QBP,CCL19,CCR7,CD36,CD40,CD40LG,CMKLR1,FOXP1,HLA-B,HLA-G,HMGB1,HSPD1,IDO1,IFNG,IL10,IL23A,IRAK3,IRF1,IRF5,IRF8,JAK3,LGALS9,LILRB1,LTB,MAPK11,MAPK14,MAST2,MEFV,NFKB1,PIBF1,PLCB1,RELA,RIPK2,SLAMF1,THBS1,TIGIT,TIRAP,TLR2,TLR3,TLR4,TLR9,TNFRSF9,TNFSF4,TNFSF9,TRAF6	Human
NCB-CB	_tstat	within each collection	BP: GO biological process	GO_DEFENSE_RESPONSE_TO_BACTERIUM	0.00054	0.00530695	-0.474094	-2.35124	0	144	B2M,TNFRSF14,HLA-E,TLR1,GBP6,RAB1A,MYD88,GNLY,HLA-A,ACP5,IL10,IL27RA,DEFA1,PLAC8,C5AR1,CD160,TLR6,LTA,IRF8,IGLL5,HAVCR2,FCER1G,TIRAP,CD4,TRDC,TNFSF8,FGR,TLR4,NOD2,RIPK2,IGLC1,SELP,KLRK1,TLR2,IGHG1,RPL39,BCL3,SFTPD,P2RX7,NOS2,IGHG4,SPN,STAB1,IGLC3,CCR2,IGKC,IL6R,CD36,LYST,TNFRSF1A,IGLC2,LYZ,PYCARD,RAB14,CFP,NLRC4,MUC5B,KLRC4-KLRK1,TLR3,IGHV3-23,CXCL13,IL23A,S100A9,OPTN,ISG15,FAU,IGHG2,TNF,DMBT1,TR…	78	0.541667	ACP5,ADAM17,ADAMTS5,ADM,ANG,ANKRD17,ANXA3,APP,B2M,BCL3,C10orf99,C5AR1,CARD9,CCL20,CCR2,CD160,CD36,CD4,CEBPB,CFP,CHGA,CLEC4E,COCH,CRP,CTSG,CXCL13,CXCL6,DEFA1,DEFB1,DMBT1,DROSHA,FAU,FCER1G,FCN2,FGA,FGB,FGR,GBP6,GNLY,HAMP,HAVCR2,HIST1H2BJ,HIST1H2BK,HIST2H2BE,HLA-A,HLA-E,HMGB2,HP,IFNG,IGHA1,IGHA2,IGHD,IGHE,IGHG1,IGHG2,IGHG3,IGHG4,IGHM,IGHV3-23,IGKC,IGKV3-20,IGLC1,IGLC2,IGLC3,IGLC7,IGLL5,IL10,IL12A,IL…	Human
NCB-CB	_tstat	within each collection	BP: GO biological process	GO_ACTIVATION_OF_INNATE_IMMUNE_RESPONSE	0.000585	0.00532009	-0.45368	-2.34686	0	191	NFKB1,PSMB8,PSMB9,PSME1,PSMB10,CASP8,ICAM2,TLR1,AIM2,CYLD,TNIP1,TICAM2,BIRC3,MYD88,BTK,IRAK2,PSMA4,PIK3AP1,CARD11,LY96,CD180,CD86,TLR6,HAVCR2,CLEC4A,FCER1G,CD209,TIRAP,CTSS,ITGAM,PRKACB,RPS6KA3,PSMA5,FBXW11,ITGB2,TLR4,NOD2,TNIP3,UBE2D3,FCN1,UBE2D1,RIPK2,KLRK1,ITCH,TLR2,TLR8,IFIH1,RIPK1,ICAM3,CD14,SKP1,HCK,RFTN1,MARCO,TAB2,CD36,LYN,PSME2,IRAK4,TLR7,PYCARD,TLR10,CLEC7A,ADAM8,IKBKG,NFKBIA,NLRC4,CLEC…	97	0.507853	ADAM8,AIM2,BCL10,BIRC2,BIRC3,BTK,BTRC,CARD11,CARD9,CASP8,CD14,CD180,CD209,CD36,CD86,CHUK,CLEC4A,CLEC4C,CLEC4E,CLEC6A,CLEC7A,CNPY3,COLEC12,CREBBP,CTSB,CTSK,CTSS,CUL1,CYLD,DDX58,DMBT1,EP300,FADD,FBXW11,FCER1G,FCN1,FYN,HAVCR2,HCK,HMGB1,HRAS,HSP90B1,HSPD1,ICAM2,ICAM3,IFI16,IFIH1,IKBKB,IKBKE,IKBKG,IRAK1,IRAK2,IRAK3,IRAK4,IRF3,IRF7,ITCH,ITGAM,ITGB2,KLRC4-KLRK1,KLRK1,KRAS,LBP,LGALS9,LGMN,LSM14A,LY96,LYN…	Human
NCB-CB	_tstat	within each collection	BP: GO biological process	GO_MYD88_DEPENDENT_TOLL_LIKE_RECEPTOR_SIGNALING_PATHWAY	0.00045	0.00530695	-0.645598	-2.34204	0	31	TLR1,TNIP1,MYD88,BTK,IRAK2,LY96,TLR6,TIRAP,TLR4,TLR2,TLR8,CD14,TAB2,CD36,IRAK4,TLR7,TLR10	17	0.548387	BTK,CD14,CD36,HSPD1,IRAK1,IRAK2,IRAK3,IRAK4,LY96,MAP3K1,MAP3K7,MYD88,RPS27A,TAB1,TAB2,TAB3,TIRAP,TLR1,TLR10,TLR2,TLR4,TLR5,TLR6,TLR7,TLR8,TLR9,TNIP1,TRAF6,UBA52,UBB,UBC	Human
NCB-CB	_tstat	within each collection	BP: GO biological process	GO_ADAPTIVE_IMMUNE_RESPONSE_BASED_ON_SOMATIC_RECOMBINATION_OF_IMMUNE_RECEPTORS_BUILT_FROM_IMMUNOGLOBULIN_SUPERFAMILY_DOMAINS	0.000545	0.00530695	-0.473413	-2.33528	0	141	NBN,RAB27A,C2,MICB,POU2F2,IGLV7-43,C3AR1,IL4R,CD74,IGHV2-70,BTN3A2,BTN3A3,IGKV1D-33,IGKV3D-20,TLR6,IGKV3D-11,IGLL5,FCER1G,BATF,TRDC,CRTAM,MYO1G,TLR4,C1QA,IGLC1,SLAMF6,IGKV1-5,C1QC,MEF2C,SLAMF1,IGHG1,TLR8,INPP5D,CD27,BCL3,IL18,EBI3,CR1,CD40LG,IGHG4,C1QB,RFTN1,IGLC3,IGKV4-1,UNC13D,IGKC,LY9,IGLC2,IRF4,FOXP3,STAT6,IL31RA,GCNT3,CTSH,KLHL6,CD8A,IGHV3-23,CXCL13,FAS,IRF7,IGHG2,RELB	62	0.439716	ADAM17,BATF,BCL10,BCL3,BCL6,BTN3A2,BTN3A3,C1QA,C1QB,C1QBP,C1QC,C1R,C1RL,C1S,C2,C3,C3AR1,C4A,C4B,C4BPA,C4BPB,C5,C6,C7,C8A,C8B,C8G,C9,CADM1,CD27,CD40LG,CD46,CD55,CD74,CD8A,CFI,CLU,CR1,CR2,CRTAM,CTSC,CTSH,CXCL13,DENND1B,DLG1,EBI3,EMP2,ERCC1,EXO1,EXOSC3,EXOSC6,FAS,FCER1G,FOXP3,GAPT,GATA3,GCNT3,GNL1,HLA-DQB1,HLA-DRB1,HLA-DRB5,HMGB1,HRAS,HSPD1,ICAM1,IGHA1,IGHA2,IGHD,IGHE,IGHG1,IGHG2,IGHG3,IGHG4,IGHM,IG…	Human
NCB-CB	_tstat	within each collection	BP: GO biological process	GO_REGULATION_OF_T_CELL_PROLIFERATION	0.000528	0.00530695	-0.477899	-2.32758	0	128	TNFRSF14,PRKCQ,CASP3,HLA-E,IRF1,CCDC88B,CD274,LILRB1,CD28,PDCD1LG2,IL15,HLA-A,IL10,CARD11,HLA-DPA1,NCKAP1L,CD86,AIF1,HAVCR2,CD209,CD4,ZAP70,SASH3,RAC2,CD80,IL12RB1,RIPK2,HLA-DMB,HLA-DPB1,ITCH,RIPK3,LILRB2,SLAMF1,IL1B,BTN2A2,PTPRC,RASAL3,IL18,SFTPD,CD6,EBI3,CD40LG,PLA2G2D,VCAM1,CD3E,IL2RA,CORO1A,SPN,CD1D,ADK,CCR2,HLA-G,AGER,PYCARD,FOXP3,CCL5,JAK3,PTPN6,CD244,SCGB1A1,LGALS9,IL23A,DNAJA3,IL27,STAT5B	65	0.507812	ADK,AGER,AIF1,ANXA1,BMP4,BTN2A2,CARD11,CASP3,CCDC88B,CCL19,CCL5,CCR2,CD1D,CD209,CD24,CD244,CD274,CD276,CD28,CD3E,CD4,CD40LG,CD46,CD55,CD59,CD6,CD80,CD86,CDKN2A,CEBPB,CLEC4G,CORO1A,CTNNB1,DHPS,DLG1,DNAJA3,EBI3,EFNB1,EPO,ERBB2,FADD,FOXJ1,FOXP3,GLMN,GNRH1,GPAM,HAVCR2,HES1,HLA-A,HLA-DMB,HLA-DPA1,HLA-DPB1,HLA-DRB1,HLA-DRB5,HLA-E,HLA-G,HMGB1,ICOSLG,IDO1,IFNG,IGF1,IGF2,IGFBP2,IHH,IL10,IL12A,IL12RB1,IL15…	Human
NCB-CB	_tstat	within each collection	BP: GO biological process	GO_POSITIVE_REGULATION_OF_INNATE_IMMUNE_RESPONSE	0.000605	0.00532127	-0.439293	-2.32435	0	228	NFKB1,PSMB8,PSMB9,PSME1,PSMB10,VAV1,CASP8,HLA-E,ICAM2,TLR1,AIM2,CYLD,TNIP1,TICAM2,BIRC3,NCR3,MYD88,BTK,RASGRP1,IRAK2,PSMA4,PIK3AP1,CARD11,LY96,CD180,CD86,TLR6,HAVCR2,CLEC4A,FCER1G,CD209,TIRAP,CTSS,SH2D1B,CRTAM,ITGAM,PRKACB,NLRC5,RPS6KA3,PSMA5,FBXW11,ITGB2,TLR4,NOD2,TNIP3,UBE2D3,FCN1,UBE2D1,RIPK2,SLAMF6,GBP5,KLRK1,ITCH,TLR2,TXK,TLR8,IFIH1,RIPK1,ICAM3,CD14,SKP1,HCK,RFTN1,SH2D1A,CD1D,LAG3,MARCO,TAB2…	119	0.52193	ADAM8,AIM2,AP1G1,BCL10,BIRC2,BIRC3,BTK,BTRC,CADM1,CARD11,CARD9,CASP8,CCL5,CD14,CD180,CD1D,CD209,CD226,CD36,CD86,CHUK,CLEC4A,CLEC4C,CLEC4E,CLEC6A,CLEC7A,CNPY3,COCH,COLEC12,CREBBP,CRTAM,CTSB,CTSK,CTSS,CUL1,CYLD,DDX58,DMBT1,EP300,EREG,FADD,FBXW11,FCER1G,FCN1,FYN,GBP5,HAVCR2,HCK,HLA-E,HMGB1,HMGB2,HPX,HRAS,HSP90B1,HSPD1,ICAM2,ICAM3,IFI16,IFIH1,IKBKB,IKBKE,IKBKG,IL12A,IRAK1,IRAK2,IRAK3,IRAK4,IRF3,IRF7,…	Human
NCB-CB	_tstat	within each collection	BP: GO biological process	GO_RESPONSE_TO_BACTERIUM	0.000689	0.00544918	-0.40947	-2.32111	0	405	MAPK9,CD40,NFKB1,B2M,TNFRSF14,TRIB1,NR1H3,CASP3,CASP8,HLA-E,TLR1,LILRB1,GBP6,TICAM2,RAB1A,MYD88,IRAK2,GNLY,CCL3,COMT,MPO,STAP1,HLA-A,ACP5,IL10,IL27RA,HLA-B,DEFA1,PLAC8,LY96,CD180,C5AR1,CD86,CD160,TLR6,LTA,IRF8,IGLL5,HAVCR2,NOS3,FCER1G,TIRAP,CD4,TRDC,FASLG,MAPK14,IRF5,ERAP1,RPS6KA3,TNFSF8,FGR,CASP1,SERPINB9,EIF2AK2,PTPN22,TLR4,NOD2,TNIP3,TNFRSF11A,DUSP10,NR1D1,MTDH,IFNAR1,CD80,RIPK2,TNFRSF1B,CXCL1…	178	0.439506	ABCA1,ABL1,ABR,ACP5,ADAM17,ADAM9,ADAMTS5,ADH5,ADM,AKIRIN2,AKT1,ALAD,ALPL,ANG,ANKRD17,ANXA3,APOB,APP,ARG1,ASS1,AXL,B2M,BAIAP2,BAIAP2L1,BCL10,BCL3,BCR,BYSL,C10orf99,C4B,C5AR1,CARD9,CASP1,CASP3,CASP8,CASP9,CAV1,CCL2,CCL20,CCL3,CCL5,CCR2,CCR5,CCR7,CD14,CD160,CD180,CD1D,CD24,CD27,CD36,CD4,CD40,CD47,CD6,CD80,CD86,CDC73,CDK19,CEBPB,CFP,CHGA,CHIT1,CHUK,CLEC4E,CMPK2,CNP,CNR1,CNR2,COCH,COMT,CPEB1,CPS1,CRP,…	Human
NCB-CB	_tstat	within each collection	BP: GO biological process	GO_PATTERN_RECOGNITION_RECEPTOR_SIGNALING_PATHWAY	0.000503	0.00530695	-0.4945	-2.31955	0	102	CASP8,TLR1,CYLD,TNIP1,TICAM2,BIRC3,MYD88,BTK,IRAK2,PIK3AP1,LY96,CD180,CD86,TLR6,HAVCR2,TIRAP,CTSS,ITGAM,RPS6KA3,ITGB2,TLR4,NOD2,TNIP3,UBE2D3,FCN1,UBE2D1,RIPK2,ITCH,TLR2,TLR8,IFIH1,RIPK1,CD14,RFTN1,MARCO,TAB2,CD36,IRAK4,TLR7,TLR10,CLEC7A,IKBKG,NFKBIA,TRIM5,TLR3,RELA,LGALS9,TRAF3,MAPKAPK3,IRF7,TNFAIP3,DMBT1	52	0.509804	BCL10,BIRC2,BIRC3,BTK,CASP8,CD14,CD180,CD36,CD86,CHUK,CLEC7A,CNPY3,COLEC12,CTSB,CTSK,CTSS,CYLD,DDX58,DMBT1,FADD,FCN1,HAVCR2,HSP90B1,HSPD1,IFIH1,IKBKB,IKBKE,IKBKG,IRAK1,IRAK2,IRAK3,IRAK4,IRF3,IRF7,ITCH,ITGAM,ITGB2,LBP,LGALS9,LGMN,LSM14A,LY96,MAP2K6,MAP3K1,MAP3K7,MAPKAPK2,MAPKAPK3,MARCO,MAVS,MYD88,NFKBIA,NOD1,NOD2,NR1H4,PGLYRP2,PIK3AP1,PIK3C3,PIK3R4,PRKCE,RELA,RFTN1,RIPK1,RIPK2,RPS27A,RPS6KA3,S100A…	Human
NCB-CB	_tstat	within each collection	BP: GO biological process	GO_IMMUNE_EFFECTOR_PROCESS	0.000708	0.00546749	-0.408048	-2.31818	0	425	SNAP23,NBN,CD40,APOBEC3D,APOBEC3G,RAB27A,TRIM25,ZC3HAV1,ACE,C2,TRIM34,VAV1,MICB,OAS1,POU2F2,HERC5,IRF1,IGLV7-43,LAT2,IL4R,LILRB1,VAMP8,VSIG4,CD74,IGHV2-70,BTN3A2,RASGRP1,CYFIP1,CCL3,FAM111A,BST2,MPO,BTN3A3,IGKV1D-33,ELMO1,DEFA1,MILR1,IGKV3D-20,LAT,APBB1IP,CD180,DHX58,NCKAP1L,CD86,IFIT3,C19orf66,IGKV3D-11,VAMP7,IGLL5,HAVCR2,IFIT5,APOBEC3F,MX1,FCER1G,BATF,WAS,ZAP70,TRDC,IFITM1,SH2D1B,CRTAM,IRF5,OAS…	207	0.487059	ABCC9,ABCF3,ABI1,ABL1,ACE,ACTB,ACTG1,ACTR2,ACTR3,ADA,ADAM17,ADAR,ADARB1,AGBL4,AGBL5,AIMP1,ANXA3,APBB1IP,APOBEC3A,APOBEC3B,APOBEC3C,APOBEC3D,APOBEC3F,APOBEC3G,ARPC1A,ARPC1B,ARPC2,ARPC3,ARPC4,ARPC5,ATG7,ATP7A,BAIAP2,BATF,BCL10,BCL2,BCL3,BECN1,BNIP3,BNIP3L,BRK1,BST2,BTN3A2,BTN3A3,C19orf66,C1QA,C1QB,C1QBP,C1QC,C1R,C1RL,C1S,C2,C3,C4A,C4B,C4BPA,C4BPB,C5,C6,C7,C8A,C8B,C8G,C9,CADM1,CAMK4,CARD9,CCL3,CD180…	Human
NCB-CB	_tstat	within each collection	BP: GO biological process	GO_REGULATION_OF_ALPHA_BETA_T_CELL_PROLIFERATION	0.000444	0.00530695	-0.706207	-2.31247	0	21	TNFRSF14,HLA-E,IRF1,CD28,HLA-A,ZAP70,CD80,RIPK2,ITCH,RASAL3,IL18,EBI3,CD3E,CCR2,CD244,LGALS9,IL23A	17	0.809524	CCR2,CD244,CD28,CD3E,CD55,CD80,EBI3,HLA-A,HLA-E,IL18,IL23A,IRF1,ITCH,LGALS9,RASAL3,RIPK2,SYK,TNFRSF14,TNFSF4,XCL1,ZAP70	Human
NCB-CB	_tstat	within each collection	BP: GO biological process	GO_REGULATION_OF_TUMOR_NECROSIS_FACTOR_SUPERFAMILY_CYTOKINE_PRODUCTION	0.000491	0.00530695	-0.505441	-2.3121	0	89	HLA-E,CD274,TLR1,LILRB1,RASGRP1,CCL3,ACP5,IL10,LY96,CD86,HAVCR2,FCER1G,TIRAP,PTPN22,TLR4,SASH3,NOD2,RIPK2,JAK2,TLR2,SLAMF1,RIPK1,BCL3,CD14,UBE2J1,AXL,SPN,NLRC3,NFKBIL1,PTAFR,CCR2,TNFRSF8,CD36,PYCARD,FOXP3,ADAM8,ZFP36,ARRB2,HSF1,PIK3R1,TLR3,LGALS9,CYBA,IL23A,CD2,ANGPT1,ZC3H12A,TNFAIP3,PTGER4,CCL19,ARFGEF2,IFNG	52	0.58427	ACP5,ADAM8,ADIPOQ,ANGPT1,ARFGEF2,ARHGEF2,ARRB2,AXL,BCL3,CARD9,CCL19,CCL2,CCL3,CCR2,CD14,CD2,CD274,CD34,CD36,CD86,CHRNA7,CLU,CYBA,ERRFI1,FADD,FCER1G,FOXP1,FOXP3,GAS6,GPNMB,GSTP1,HAVCR2,HDAC2,HLA-E,HMGB1,HSF1,HSPB1,IFNG,IL10,IL23A,IRAK3,JAK2,LBP,LGALS9,LILRB1,LTF,LY96,MAPKAPK2,MAVS,MC1R,NCL,NFATC4,NFKBIL1,NLRC3,NOD1,NOD2,NR1H4,ORM1,PIK3R1,PTAFR,PTGER4,PTPN22,PYCARD,RARA,RASGRP1,RIPK1,RIPK2,SASH3,SL…	Human
NCB-CB	_tstat	within each collection	BP: GO biological process	GO_TOLL_LIKE_RECEPTOR_SIGNALING_PATHWAY	0.000495	0.00530695	-0.512805	-2.31012	0	83	CASP8,TLR1,TNIP1,TICAM2,BIRC3,MYD88,BTK,IRAK2,PIK3AP1,LY96,CD180,CD86,TLR6,HAVCR2,TIRAP,CTSS,ITGAM,RPS6KA3,ITGB2,TLR4,TNIP3,UBE2D3,UBE2D1,RIPK2,TLR2,TLR8,RIPK1,CD14,RFTN1,TAB2,CD36,IRAK4,TLR7,TLR10,IKBKG,NFKBIA,TLR3,LGALS9,TRAF3,MAPKAPK3,IRF7	41	0.493976	BCL10,BIRC2,BIRC3,BTK,CASP8,CD14,CD180,CD36,CD86,CHUK,CNPY3,COLEC12,CTSB,CTSK,CTSS,FADD,HAVCR2,HSP90B1,HSPD1,IKBKB,IKBKE,IKBKG,IRAK1,IRAK2,IRAK3,IRAK4,IRF3,IRF7,ITGAM,ITGB2,LBP,LGALS9,LGMN,LY96,MAP3K1,MAP3K7,MAPKAPK2,MAPKAPK3,MYD88,NFKBIA,NR1H4,PIK3AP1,PIK3C3,PIK3R4,PRKCE,RFTN1,RIPK1,RIPK2,RPS27A,RPS6KA3,S100A14,SCARA3,TAB1,TAB2,TAB3,TANK,TBK1,TICAM1,TICAM2,TIRAP,TLR1,TLR10,TLR2,TLR3,TLR4,TLR5,TL…	Human
NCB-CB	_tstat	within each collection	BP: GO biological process	GO_NEGATIVE_REGULATION_OF_IMMUNE_RESPONSE	0.000508	0.00530695	-0.490438	-2.30882	0	104	NR1H3,HFE,HLA-E,IL4R,FCRLB,LILRB1,NLRX1,BST2,TAP1,HLA-A,IL10,IL27RA,HLA-B,DHX58,HAVCR2,SAMSN1,CD84,NLRC5,IL33,SERPINB9,NMI,DUSP10,CD300A,NLRP6,LILRB2,SLAMF1,PTPRC,INPP5D,CR1,PPARG,IL2RA,SPN,CCR2,HLX,HLA-G,BCR,LYN,FOXP3,HMOX1,STAT6,ARRB2,JAK3,PTPN6,IFI16,LGALS9,DNAJA3,ANGPT1,TNFAIP3,TNF,DRD2,IL7R	51	0.490385	A2M,ABR,ADAR,AMBP,ANGPT1,ANXA1,APOA1,APOA2,ARRB2,BCL6,BCR,BST2,C4BPA,C4BPB,CCR2,CD300A,CD46,CD55,CD59,CD84,CEACAM1,CLEC4G,COL3A1,CR1,CUEDC2,DHX58,DNAJA3,DRD2,DUSP10,DUSP22,FCRLB,FER,FOXF1,FOXJ1,FOXP3,GPX1,HAVCR2,HFE,HLA-A,HLA-B,HLA-E,HLA-G,HLX,HMOX1,IFI16,IGF2,IL10,IL13RA2,IL1RL1,IL20RB,IL27RA,IL2RA,IL33,IL4R,IL7R,INPP5D,IRAK3,JAK3,LGALS3,LGALS9,LILRB1,LILRB2,LYN,MASP1,MICA,MUL1,NDFIP1,NLRC5,NLRP…	Human
NCB-CB	_tstat	within each collection	BP: GO biological process	GO_REGULATION_OF_CELL_KILLING	0.00048	0.00530695	-0.556737	-2.30437	0	55	B2M,VAV1,HLA-E,LILRB1,NCR3,RASGRP1,TAP1,STAP1,HLA-A,IL10,HLA-B,FCER2,HAVCR2,CRTAM,SERPINB9,IL12RB1,SLAMF6,KLRK1,RIPK3,PTPRC,P2RX7,NOS2,BAD,SH2D1A,CCR2,LAG3,PIK3R6,AGER,LAMP1,ARRB2,KLRC4-KLRK1,LGALS9,IL23A,STAT5B,AP1G1,IL7R,IFNG,CD226,NCR1,FADD	40	0.727273	AGER,AP1G1,ARRB2,B2M,BAD,BCL2L11,CADM1,CCL2,CCR2,CD226,CEACAM1,CRTAM,F2RL1,FADD,FCER2,HAVCR2,HLA-A,HLA-B,HLA-E,ICAM1,IFNG,IGF2,IL10,IL11,IL12A,IL12RB1,IL23A,IL7R,KLRC4-KLRK1,KLRK1,LAG3,LAMP1,LGALS9,LILRB1,MICA,NCR1,NCR3,NOS2,P2RX7,PIK3R6,PPP3CB,PTPRC,PVR,RASGRP1,RIPK3,SERPINB9,SH2D1A,SLAMF6,STAP1,STAT5B,STX7,TAP1,TGFB2,VAV1,XCL1	Human
NCB-CB	_tstat	within each collection	BP: GO biological process	GO_LEUKOCYTE_MEDIATED_IMMUNITY	0.000562	0.00532009	-0.454794	-2.30283	0	165	SNAP23,NBN,RAB27A,ACE,C2,MICB,POU2F2,IGLV7-43,LAT2,IL4R,VAMP8,CD74,IGHV2-70,BTN3A2,RASGRP1,CCL3,BTN3A3,IGKV1D-33,MILR1,IGKV3D-20,LAT,IGKV3D-11,VAMP7,IGLL5,FCER1G,BATF,TRDC,CRTAM,MYO1G,PI4K2A,SERPINB9,C1QA,GZMB,IGLC1,IGKV1-5,C1QC,SLAMF1,IGHG1,TLR8,INPP5D,CD27,BCL3,CR1,CD40LG,IGHG4,C1QB,PIK3CG,S100A13,RFTN1,CORO1A,IGLC3,SLAMF7,IGKV4-1,UNC13D,IGKC,IL6R,LYST,LYN,IGLC2,IRAK4,FOXP3	61	0.369697	ACE,ADAM17,ANXA3,BATF,BCL10,BCL3,BTN3A2,BTN3A3,C1QA,C1QB,C1QBP,C1QC,C1R,C1RL,C1S,C2,C3,C4A,C4B,C4BPA,C4BPB,C5,C6,C7,C8A,C8B,C8G,C9,CADM1,CAMK4,CCL3,CD27,CD40LG,CD46,CD55,CD74,CD8A,CEBPG,CFI,CHGA,CLU,CORO1A,CPLX2,CR1,CR2,CRTAM,CTSC,CTSG,CTSH,CXCL5,CXCL6,DBH,DENND1B,DLG1,EMP2,ERCC1,EXO1,EXOSC3,EXOSC6,FAS,FCER1G,FOXP3,GAPT,GATA2,GATA3,GCNT3,GNL1,GZMB,HLA-DQB1,HLA-DRB1,HLA-DRB5,HSPD1,ICAM1,IGHA1,IGHA…	Human
NCB-CB	_tstat	within each collection	BP: GO biological process	GO_INFLAMMATORY_RESPONSE	0.000689	0.00544918	-0.408932	-2.29392	0	382	SNAP23,CD40,NFKB1,TNFRSF14,GSDMD,HFE,PRKCQ,PLA2G4C,IL1RL2,MGLL,CCR1,TLR1,C3AR1,APOL3,AIM2,IL4R,TNIP1,TICAM2,CCL4L2,CCL24,CYBB,NCR3,MYD88,RASGRP1,IRAK2,NUPR1,CCL3,SIGIRR,IL15,CSF1,IL10,FOLR2,CASP4,PARP4,LY96,LAT,CD180,C5AR1,TLR6,AIF1,IL18RAP,HAVCR2,APOL2,CD163,FCER1G,TIRAP,ZAP70,SIGLEC1,CSF1R,SMAD1,XCR1,ITGB2,ITGAL,NMI,TLR4,LY75,TNIP3,NFAM1,TNFRSF11A,ANO6,IL10RB,RIPK2,TNFRSF1B,CXCL11,ADORA2A,CNR2,…	172	0.450262	ABCF1,ACVR1,ADAM8,ADORA1,ADORA2A,ADRA2A,AFAP1L2,AGER,AGTR2,AHCY,AHSG,AIF1,AIM2,AIMP1,AKT1,ALOX5,ANO6,ANXA1,AOAH,AOC3,AOX1,APCS,APOA2,APOC3,APOL2,APOL3,ASS1,ATRN,AXL,B4GALT1,BCL6,BDKRB2,BLNK,BMP2,BMP6,BMPR1B,C3,C3AR1,C4A,C4B,C5,C5AR1,CAMK1D,CAMK4,CARD18,CASP4,CCL11,CCL13,CCL14,CCL15,CCL16,CCL18,CCL19,CCL2,CCL20,CCL21,CCL22,CCL23,CCL24,CCL3,CCL4,CCL4L2,CCL5,CCL7,CCL8,CCR1,CCR2,CCR3,CCR4,CCR5,CCR7,C…	Human
NCB-CB	_tstat	within each collection	BP: GO biological process	GO_LYMPHOCYTE_CHEMOTAXIS	0.000451	0.00530695	-0.626949	-2.29164	0	32	CCL4L2,CCL24,CCL3,CXCL11,CKLF,PIK3CG,CCL8,XCL2,CCR2,CCL21,ADAM8,CCL5,CCL23,CXCL13,CX3CL1,CXCR3,CCL13,CCL18,CCL19,CXCL10	20	0.625	ADAM8,CCL11,CCL13,CCL14,CCL15,CCL16,CCL18,CCL19,CCL2,CCL20,CCL21,CCL22,CCL23,CCL24,CCL3,CCL4L2,CCL5,CCL8,CCR2,CKLF,CX3CL1,CXCL10,CXCL11,CXCL13,CXCL16,CXCR3,GAS6,PIK3CD,PIK3CG,SAA1,XCL1,XCL2	Human
NCB-CB	_tstat	within each collection	BP: GO biological process	GO_POSITIVE_REGULATION_OF_ALPHA_BETA_T_CELL_ACTIVATION	0.000468	0.00530695	-0.565087	-2.2895	0	49	PRKCQ,HLA-E,IL4R,CD28,HLA-A,NCKAP1L,CD86,NKAP,ZAP70,ADA,SASH3,CD80,IL12RB1,RIPK2,RASAL3,IL18,EBI3,CD3E,CCR2,HLX,NLRP3,AP3D1,FOXP3,CD244,LGALS9,IL23A,CCL19,TGFBR2,IFNG	29	0.591837	ADA,ANXA1,AP3B1,AP3D1,CCL19,CCR2,CD244,CD28,CD3E,CD55,CD80,CD83,CD86,EBI3,FOXP3,GLI3,HLA-A,HLA-E,HLX,HSPH1,IFNG,IHH,IL12A,IL12RB1,IL18,IL23A,IL4R,IL6,ITPKB,LGALS9,MYB,NCKAP1L,NKAP,NLRP3,PNP,PRKCQ,PRKCZ,RARA,RASAL3,RIPK2,SASH3,SHH,SOCS5,SYK,TGFBR2,TNFSF4,XCL1,ZAP70,ZBTB16	Human
NCB-CB	_tstat	within each collection	BP: GO biological process	GO_ANTIGEN_RECEPTOR_MEDIATED_SIGNALING_PATHWAY	0.000576	0.00532009	-0.44268	-2.27944	0	183	NFKB1,PSMB8,SPG21,PSMB9,PSME1,PSMB10,PRKCQ,LAT2,CD19,STK11,BLK,CD28,BTK,TRAC,PSMA4,CARD11,NFATC2,HLA-DPA1,HLA-DRA,LAT,NCKAP1L,IGLL5,TRAT1,WAS,CD4,ZAP70,TRDC,BTN3A1,CSK,ITK,CD3D,SKAP1,PSMA5,CD247,FBXW11,LCK,NFAM1,THEMIS,UBE2D1,RIPK2,IGLC1,HLA-DPB1,MEF2C,TXK,IGHG1,PTPRC,INPP5D,SKP1,IGHG4,LAX1,CD3E,RFTN1,TRBC1,IGLC3,RFTN2,IGKC,LCP2,TAB2,MAPK1,CD79A,LYN,PSME2,IGLC2,FOXP3,CD38,IKBKG,NFKBIA,GRAP2,CTLA4…	99	0.540984	ABL1,BAX,BCAR1,BCL10,BCL2,BLK,BTK,BTN3A1,BTRC,CACNB3,CACNB4,CARD11,CD19,CD247,CD28,CD38,CD3D,CD3E,CD3G,CD4,CD79A,CD79B,CHUK,CSK,CTLA4,CUL1,DENND1B,FBXW11,FOXP3,FYN,GATA3,GRAP2,HLA-DPA1,HLA-DPB1,HLA-DQA1,HLA-DQA2,HLA-DQB1,HLA-DQB2,HLA-DRA,HLA-DRB1,HLA-DRB5,HRAS,IFNG,IGHA1,IGHA2,IGHD,IGHE,IGHG1,IGHG2,IGHG3,IGHG4,IGHM,IGHV3-23,IGKC,IGLC1,IGLC2,IGLC3,IGLC7,IGLL5,IKBKB,IKBKG,INPP5D,ITK,KLHL6,LAT,LAT2,…	Human
NCB-CB	_tstat	within each collection	BP: GO biological process	GO_LYMPHOCYTE_MEDIATED_IMMUNITY	0.000528	0.00530695	-0.467749	-2.27815	0	128	NBN,RAB27A,C2,MICB,POU2F2,IGLV7-43,IL4R,CD74,IGHV2-70,BTN3A2,BTN3A3,IGKV1D-33,IGKV3D-20,IGKV3D-11,VAMP7,IGLL5,FCER1G,BATF,TRDC,CRTAM,MYO1G,C1QA,GZMB,IGLC1,IGKV1-5,C1QC,SLAMF1,IGHG1,TLR8,INPP5D,CD27,BCL3,CR1,CD40LG,IGHG4,C1QB,RFTN1,CORO1A,IGLC3,SLAMF7,IGKV4-1,UNC13D,IGKC,LYST,IGLC2,FOXP3,IL31RA,GCNT3,CTSH,PTPN6,CD8A,IGHV3-23,FAS,IRF7,IGHG2,PRDX1,IGKV3-20,SLA2,C7,IGHM,IGHG3,SERPING1	62	0.484375	BATF,BCL10,BCL3,BTN3A2,BTN3A3,C1QA,C1QB,C1QBP,C1QC,C1R,C1RL,C1S,C2,C3,C4A,C4B,C4BPA,C4BPB,C5,C6,C7,C8A,C8B,C8G,C9,CADM1,CD27,CD40LG,CD46,CD55,CD74,CD8A,CEBPG,CFI,CLU,CORO1A,CR1,CR2,CRTAM,CTSC,CTSH,DENND1B,DLG1,EMP2,ERCC1,EXO1,EXOSC3,EXOSC6,FAS,FCER1G,FOXP3,GAPT,GATA3,GCNT3,GNL1,GZMB,HLA-DQB1,HLA-DRB1,HLA-DRB5,HSPD1,ICAM1,IGHA1,IGHA2,IGHD,IGHE,IGHG1,IGHG2,IGHG3,IGHG4,IGHM,IGHV2-70,IGHV3-23,IGKC,IG…	Human
NCB-CB	_tstat	within each collection	BP: GO biological process	GO_NEGATIVE_REGULATION_OF_MULTI_ORGANISM_PROCESS	0.000528	0.00530695	-0.467331	-2.27612	0	128	APOBEC3D,APOBEC3G,PARP10,TRIM25,ZC3HAV1,TRIB1,MICB,OAS1,TNIP1,TRIM21,NLRX1,CCL3,FAM111A,BST2,SIGIRR,MPO,TRIM31,IL10,DHX58,C19orf66,LTA,IRF8,HAVCR2,APOBEC3F,MX1,TIRAP,IFITM1,MID2,OAS3,ACVR1C,ADA,PPM1B,PRDX4,OVGP1,EIF2AK2,TRIM14,ARHGDIB,FCN1,TRIM26,ITCH,APOBEC3C,IFIT1,ISG20,SP100,IL2RA,TIMP1,NFKBIL1,TRIM38,PTGDS,CCL4,CD36,SIRT2,PLSCR1,CCL5,SQSTM1,RNASEL,TRIM5,EIF2AK4,PML,RSAD2,IFI16,ISG15,ZC3H12A,T…	69	0.539062	ACVR1C,ADA,ADAR,APCS,APOBEC3A,APOBEC3C,APOBEC3D,APOBEC3F,APOBEC3G,ARHGDIB,BST2,BTBD17,C19orf66,C1QBP,CCL3,CCL4,CCL5,CCNK,CD36,CHMP3,CTSG,DHX58,EIF2AK2,EIF2AK4,FAM111A,FBLN1,FCN1,FCN3,GSN,HAVCR2,HDAC1,HMGA2,HPGDS,HTRA1,IFI16,IFIT1,IFITM1,IFITM2,IFITM3,IFNG,IGF1,IL10,IL2RA,ILF3,INPP5K,IRF8,ISG15,ISG20,ITCH,ITGAV,JUN,LBP,LTA,LTF,MAVS,MBL2,MICB,MID2,MPO,MUL1,MX1,NFKBIL1,NLRX1,NPR2,OAS1,OAS3,OASL,OVGP…	Human
NCB-CB	_tstat	within each collection	BP: GO biological process	GO_POSITIVE_REGULATION_OF_LEUKOCYTE_DIFFERENTIATION	0.000509	0.00530695	-0.473695	-2.26769	0	113	ATP11C,TRIB1,TMEM64,CASP8,IL1RL2,FLT3LG,CCR1,IL4R,CD74,BTK,RASGRP1,IL15,CSF1,NCKAP1L,CD86,NKAP,ZAP70,CSF1R,ADA,SASH3,CD80,IL12RB1,RIPK2,SLC9B2,RAG1,LILRB2,IL1B,PPP2R3C,INPP5D,XBP1,RIPK1,CD27,BAD,OGT,IL7,AXL,IL2RA,HLX,HLA-G,NLRP3,AP3D1,PIK3R6,AGER,FOXP3,ADAM8,CCL5,LGALS9,IL23A,STAT5B,PPARGC1B,TNF,TNFSF11,IL7R,CCL19,TGFBR2,IFNG,PRDM1,TNFSF9,CD83,FADD	60	0.530973	ACIN1,ADA,ADAM8,AGER,ANXA1,AP3B1,AP3D1,ATP11C,ATP6AP1,AXL,BAD,BTK,CA2,CASP8,CCL19,CCL5,CCR1,CD101,CD27,CD46,CD74,CD80,CD83,CD86,CREB1,CSF1,CSF1R,CTNNBIP1,EGR3,FADD,FLT3LG,FOS,FOXP3,GAS6,GATA3,GLI2,GLI3,GNAS,GPR68,HAX1,HCLS1,HLA-G,HLX,HMGB1,ID2,IFNG,IHH,IL12A,IL12RB1,IL15,IL1B,IL1RL2,IL23A,IL2RA,IL34,IL4R,IL6,IL7,IL7R,INPP5D,ITPKB,JUN,KITLG,KLF10,LEF1,LGALS1,LGALS3,LGALS9,LIF,LILRB2,MMP14,MYB,NCKA…	Human
NCB-CB	_tstat	within each collection	BP: GO biological process	GO_MONOCYTE_CHEMOTAXIS	0.000447	0.00530695	-0.614524	-2.26637	0	33	PTPRO,CCL4L2,CCL24,CCL3,FOLR2,TNFRSF11A,CCL8,XCL2,CCL4,IL6R,CCL21,CCL7,CCL5,CCL23,CX3CL1,CCL13,CCL18,TNFSF11,CCL19	19	0.575758	ANXA1,CCL11,CCL13,CCL14,CCL15,CCL16,CCL18,CCL19,CCL2,CCL20,CCL21,CCL22,CCL23,CCL24,CCL3,CCL4,CCL4L2,CCL5,CCL7,CCL8,CX3CL1,FLT1,FOLR2,IL6,IL6R,LGALS3,PDGFB,PTPRO,RPS19,TNFRSF11A,TNFSF11,XCL1,XCL2	Human
NCB-CB	_tstat	within each collection	BP: GO biological process	GO_T_CELL_SELECTION	0.00045	0.00530695	-0.608595	-2.26401	0	34	STK11,CD74,CD28,IL15,CARD11,BATF,CD4,ZAP70,CD3D,DOCK2,THEMIS,SLAMF6,CCR7,CD3E,SPN,CD1D,LY9,IRF4,FOXP3,STAT6	20	0.588235	ATG5,BATF,BCL11B,BCL2,BRAF,CARD11,CCR7,CD1D,CD28,CD3D,CD3E,CD4,CD74,DOCK2,FAS,FOXP3,GATA3,GLI3,IL15,IL6,IRF4,ITPKB,JAG2,LY9,SHH,SLAMF6,SPN,SRF,STAT6,STK11,SYK,THEMIS,ZAP70,ZFPM1	Human
NCB-CB	_tstat	within each collection	BP: GO biological process	GO_REGULATION_OF_B_CELL_ACTIVATION	0.000506	0.00530695	-0.474419	-2.256	0	109	CD40,ATP11C,BST1,TNFSF13B,CASP3,BANK1,CD74,CD28,BTK,TNFRSF13B,IL10,IL27RA,CARD11,TBX21,NFATC2,NCKAP1L,IGLL5,TIRAP,ZAP70,TRDC,SAMSN1,ADA,TBC1D10C,TLR4,SASH3,NOD2,NFAM1,CD300A,IGLC1,MEF2C,IGHG1,PTPRC,PPP2R3C,INPP5D,XBP1,CD27,BAD,IGHG4,IL7,IGLC3,TNFRSF4,IGKC,LYN,IGLC2,GPR183,FOXP3,MZB1,CD38,STAT6,IKZF3,CTLA4,PTPN6,IGHV3-23,FAS,STAT5B,IGHG2,TNFAIP3,IFNG,PAXIP1,SLA2,PRDM1,TNFRSF21,IGHM,MNDA,IGHG3	65	0.59633	ADA,AHR,APLF,ATM,ATP11C,BAD,BANK1,BCL2,BCL6,BST1,BTK,CARD11,CASP3,CD27,CD28,CD300A,CD38,CD40,CD74,CD81,CDKN1A,CDKN2A,CLCF1,CTLA4,EXOSC3,FAS,FOXJ1,FOXP3,GPR183,ID2,IFNG,IGHA1,IGHA2,IGHD,IGHE,IGHG1,IGHG2,IGHG3,IGHG4,IGHM,IGHV3-23,IGKC,IGLC1,IGLC2,IGLC3,IGLC7,IGLL5,IKZF3,IL10,IL27RA,IL6,IL7,INHA,INHBA,INPP5D,IRS2,LYN,MEF2C,MIF,MMP14,MNDA,MSH6,MZB1,NCKAP1L,NDFIP1,NFAM1,NFATC2,NOD2,PAWR,PAXIP1,PCID2,P…	Human
NCB-CB	_tstat	within each collection	BP: GO biological process	GO_POSITIVE_REGULATION_OF_CELL_CELL_ADHESION	0.000589	0.00532009	-0.427853	-2.25457	0	219	TNFRSF14,VAV1,PRKCQ,HLA-E,IL1RL2,CCDC88B,CD274,PRR5,IL4R,LILRB1,CD74,CD28,RASGRP1,TRAC,PDCD1LG2,IL15,HLA-A,CARD11,HLA-DPA1,HLA-DRA,NCKAP1L,CD86,AIF1,NKAP,HAVCR2,SIRPG,CD4,ZAP70,MAP3K14,CSK,CD3D,ADA,CD247,LCK,SASH3,NOD2,ITGA4,ETS1,CD80,IL12RB1,RIPK2,HLA-DMB,HLA-DPB1,GCNT2,KLRK1,RAG1,LILRB2,SLAMF1,IL1B,PTPRC,XBP1,RASAL3,IL18,BTLA,DPP4,CD6,EBI3,BAD,CD40LG,VCAM1,IL7,CD3E,IL2RA,TRBC1,CORO1A,SPN,CD1D,A…	100	0.456621	ADA,ADAM8,ADK,AGER,AIF1,AKT1,ANK3,ANXA1,AP3B1,AP3D1,BAD,BCL10,BMP7,BTLA,CARD11,CAV1,CCDC88B,CCL19,CCL2,CCL21,CCL5,CCR2,CD1D,CD24,CD244,CD247,CD274,CD276,CD28,CD3D,CD3E,CD3G,CD4,CD40LG,CD44,CD46,CD47,CD5,CD55,CD59,CD6,CD74,CD80,CD83,CD86,CDC42,CITED2,CORO1A,CSK,CTLA4,CX3CL1,CXCL13,DHPS,DNAJA3,DPP4,EBI3,EFNB1,EFNB2,EFNB3,EGR3,EPO,ETS1,FADD,FGA,FGB,FGG,FLOT1,FLOT2,FOXA1,FOXA2,FOXP3,FSTL3,FYN,GATA3,G…	Human
NCB-CB	_tstat	within each collection	BP: GO biological process	GO_B_CELL_RECEPTOR_SIGNALING_PATHWAY	0.000471	0.00530695	-0.552696	-2.24592	0	50	LAT2,CD19,BLK,BTK,NFATC2,NCKAP1L,IGLL5,ZAP70,TRDC,LCK,NFAM1,IGLC1,MEF2C,IGHG1,PTPRC,IGHG4,RFTN1,IGLC3,IGKC,MAPK1,CD79A,LYN,IGLC2,CD38,CTLA4,PTPN6,KLHL6,IGHV3-23,CD79B,PRKCB,IGHG2,TEC,IGHM,MNDA,IGHG3	35	0.7	ABL1,BAX,BCAR1,BCL2,BLK,BTK,CD19,CD38,CD79A,CD79B,CTLA4,IGHA1,IGHA2,IGHD,IGHE,IGHG1,IGHG2,IGHG3,IGHG4,IGHM,IGHV3-23,IGKC,IGLC1,IGLC2,IGLC3,IGLC7,IGLL5,KLHL6,LAT2,LCK,LIME1,LYN,MAPK1,MEF2C,MNDA,NCKAP1L,NFAM1,NFATC2,PIK3CD,PLCG2,PLEKHA1,PRKCB,PTPN6,PTPRC,RFTN1,SYK,TEC,TRDC,VAV3,ZAP70	Human
NCB-CB	_tstat	within each collection	BP: GO biological process	GO_LEUKOCYTE_CELL_CELL_ADHESION	0.000594	0.00532127	-0.425836	-2.24389	0	220	B2M,RAB27A,NHEJ1,PSMB10,VAV1,CASP8,HLA-E,MICB,IRF1,GOLPH3,STK11,LILRB1,TNIP1,CD74,CD28,STK10,IL15,CARD11,TBX21,SMAD3,LAT,APBB1IP,CD86,NKAP,FCER1G,TCF7,CD209,BATF,WAS,CD4,ZAP70,BTN3A1,CRTAM,ITK,DOCK8,CD3D,ADA,TNFSF8,ITGB2,ITGAL,PTPN22,LCK,SATB1,DOCK2,ITGA4,RAC2,THEMIS,IFNAR1,CD80,RIPK2,SLAMF6,SELP,LCP1,RIPK3,RAG1,CD1C,IL1B,PTPRC,FERMT3,CCR7,BCL3,DPP4,NEDD4,P2RX7,EBI3,CD40LG,PLA2G2D,VCAM1,EOMES,IL7…	113	0.513636	ABL1,ADA,ADAM17,ANXA1,APBB1IP,APOA4,ATG5,ATP7A,AZI2,B2M,BATF,BAX,BCL11B,BCL2,BCL3,BMP7,BMX,BRAF,BTN3A1,CADM1,CARD11,CASP8,CCL19,CCL21,CCL5,CCND3,CCR7,CD151,CD1C,CD1D,CD2,CD209,CD276,CD28,CD3D,CD3E,CD3G,CD4,CD40LG,CD44,CD7,CD74,CD80,CD86,CD8A,CD8B,CDK6,CEBPB,CERCAM,CHD7,CLEC4E,CLEC4M,CLEC7A,CRTAM,CTNNB1,CXADR,CYP26B1,DDOST,DLG1,DLL4,DNAJA3,DOCK2,DOCK8,DPP4,EBI3,EGR1,EIF2AK4,ELF4,EOMES,EZR,F2RL1,FA…	Human
NCB-CB	_tstat	within each collection	BP: GO biological process	GO_PURINERGIC_NUCLEOTIDE_RECEPTOR_SIGNALING_PATHWAY	0.000441	0.00530695	-0.701005	-2.24384	0	19	P2RY6,GPR34,P2RX5,P2RX4,ANO6,P2RY11,P2RY8,P2RY12,P2RY10,P2RX7,P2RX3,P2RX1,PTAFR,P2RY13,GPR171	15	0.789474	ANO6,GPR171,GPR34,GPR87,P2RX1,P2RX3,P2RX4,P2RX5,P2RX7,P2RY1,P2RY10,P2RY11,P2RY12,P2RY13,P2RY14,P2RY2,P2RY6,P2RY8,PTAFR	Human
NCB-CB	_tstat	within each collection	BP: GO biological process	GO_CELLULAR_RESPONSE_TO_BIOTIC_STIMULUS	0.000544	0.00530695	-0.446548	-2.23105	0	149	MAPK9,CD40,NFKB1,B2M,NR1H3,TLR1,LILRB1,TICAM2,IRAK2,CCL3,STAP1,IL10,LY96,CD180,CD86,TLR6,IRF8,HAVCR2,NOS3,TIRAP,MAPK14,PTPN22,TLR4,TXNIP,TNIP3,NR1D1,MTDH,CD80,RIPK2,TNFRSF1B,ABCA1,CMPK2,KLRK1,TLR2,MEF2C,LILRB2,IL1B,XBP1,EDNRB,IL18,CD14,CD6,NOS2,CCR5,MAPK3,OGT,HCK,AXL,MUS81,NFKBIL1,PTGER3,PTAFR,MRC1,CD36,NFKBIB,MAPK1,CYP17A1,NLRP3,LYN,SIRT2,PYCARD,CLEC7A,NFKBIA,CCL5,GFI1,FZD5	66	0.442953	ABCA1,ABL1,ADAM9,AKT1,APAF1,ARG1,ASS1,ATG10,AXL,B2M,BYSL,CCDC47,CCL2,CCL20,CCL3,CCL5,CCR5,CD14,CD180,CD36,CD40,CD6,CD80,CD86,CDC73,CDK19,CEBPB,CLEC7A,CMPK2,CPEB1,CTR9,CX3CR1,CXCL10,CXCL16,CYP17A1,DAB2IP,DDIT3,EDNRB,EIF2AK3,EME1,ENTPD2,FN1,FZD5,GFI1,GSK3B,GSTP1,HAVCR2,HCK,HDAC5,HIF1A,HMGB2,HMGCS2,HNRNPM,HSPA5,ICAM1,IFNG,IL10,IL12A,IL18,IL1B,IL6,IRAK1,IRAK2,IRF3,IRF8,KLRC4-KLRK1,KLRK1,LBP,LILRB1,LI…	Human
NCB-CB	_tstat	within each collection	BP: GO biological process	GO_NATURAL_KILLER_CELL_ACTIVATION	0.000451	0.00530695	-0.610361	-2.231	0	32	RAB27A,CASP8,IL15,VAMP7,ITGB2,SLAMF6,KLRK1,IL2RB,SLAMF1,IL18,AXL,CORO1A,SLAMF7,UNC13D,ELF4,IL21R,KLRC4-KLRK1,CD244,MERTK,ZNF683,CD2,STAT5B	22	0.6875	AXL,CASP8,CD2,CD244,CORO1A,ELF4,ID2,IL15,IL18,IL18R1,IL21R,IL2RB,ITGB2,KLRC4-KLRK1,KLRK1,MERTK,NCR1,PIK3CD,RAB27A,SLAMF1,SLAMF6,SLAMF7,SNX27,SP3,STAT5B,TUSC2,TYRO3,ULBP3,UNC13D,VAMP2,VAMP7,ZNF683	Human
NCB-CB	_tstat	within each collection	BP: GO biological process	GO_POSITIVE_REGULATION_OF_CYTOKINE_BIOSYNTHETIC_PROCESS	0.000471	0.00530695	-0.548321	-2.22815	0	50	PRKCQ,IRF1,TLR1,CD28,CARD11,CD86,TLR6,LTB,TIRAP,CD4,TLR4,CD80,IL1B,TLR8,BCL3,EBI3,CD3E,SPN,PTAFR,CCR2,TNFRSF8,TLR7,IRF4,HMOX1,TLR3,RELA,IL27,STAT5B,TNF	29	0.58	APOA2,BCL10,BCL3,CARD11,CCL20,CCR2,CD276,CD28,CD3E,CD4,CD80,CD86,CEBPG,EBI3,EREG,FCER1A,GLMN,HMOX1,HSPB1,IFNG,IL1B,IL27,IRF1,IRF4,LBP,LTB,MAPKAPK2,PRKCQ,PTAFR,RELA,SPN,STAT5B,SYK,TBK1,THBS1,TICAM1,TIRAP,TLR1,TLR3,TLR4,TLR6,TLR7,TLR8,TLR9,TNF,TNFRSF13C,TNFRSF8,TRAF6,WNT5A,ZFPM1	Human
NCB-CB	_tstat	within each collection	BP: GO biological process	GO_NEGATIVE_REGULATION_OF_INNATE_IMMUNE_RESPONSE	0.00045	0.00530695	-0.59858	-2.22675	0	34	NR1H3,HLA-E,LILRB1,NLRX1,TAP1,HLA-A,HLA-B,DHX58,HAVCR2,NLRC5,SERPINB9,NMI,DUSP10,CR1,PPARG,ARRB2,IFI16,LGALS9,DNAJA3,TNFAIP3,DRD2	21	0.617647	A2M,ADAR,ARRB2,CR1,DHX58,DNAJA3,DRD2,DUSP10,HAVCR2,HLA-A,HLA-B,HLA-E,IFI16,IGF2,IRAK3,LGALS9,LILRB1,MICA,MUL1,NLRC5,NLRX1,NMI,NR1H2,NR1H3,PPARG,PTPN2,RPS19,SERPINB9,SERPING1,SUSD4,TAP1,TNFAIP3,TRAFD1,TYRO3	Human
NCB-CB	_tstat	within each collection	BP: GO biological process	GO_ANTIGEN_PROCESSING_AND_PRESENTATION_OF_PEPTIDE_ANTIGEN_VIA_MHC_CLASS_I	0.000492	0.00530695	-0.486843	-2.22324	0	88	B2M,PSMB8,PSMB9,PSME1,ACE,HFE,PSMB10,TAP2,HLA-E,TAPBP,HLA-F,CYBB,PSMA4,TAP1,HLA-A,HLA-C,HLA-B,PDIA3,SEC24A,FCER1G,SEC24B,ERAP1,PSMA5,SAR1B,NCF1,NCF4,FCGR1B,FCGR1A,HLA-G,CD36,ABCB1,PSME2,SEC24C,ERAP2,PSMC2,PSMB2,CYBA,ABCB4,SEC24D,NCF2,PSMD5,PSMC6,PSMD1,PSMA1,PSMB6,PSMD12,BCAP31	47	0.534091	ABCB1,ABCB4,ABCB5,ABCB9,ACE,AZGP1,B2M,BCAP31,CALR,CANX,CD207,CD36,CYBA,CYBB,ERAP1,ERAP2,FCER1G,FCGR1A,FCGR1B,HFE,HLA-A,HLA-B,HLA-C,HLA-E,HLA-F,HLA-G,IFI30,ITGAV,ITGB5,LNPEP,MR1,NCF1,NCF2,NCF4,PDIA3,PSMA1,PSMA2,PSMA3,PSMA4,PSMA5,PSMA6,PSMA7,PSMB1,PSMB10,PSMB2,PSMB3,PSMB4,PSMB5,PSMB6,PSMB7,PSMB8,PSMB9,PSMC1,PSMC2,PSMC3,PSMC4,PSMC5,PSMC6,PSMD1,PSMD10,PSMD11,PSMD12,PSMD13,PSMD14,PSMD2,PSMD3,PSMD4,PSM…	Human
NCB-CB	_tstat	within each collection	BP: GO biological process	GO_DEFENSE_RESPONSE_TO_OTHER_ORGANISM	0.000678	0.00544918	-0.397499	-2.21849	0	361	CD40,B2M,APOBEC3D,TNFRSF14,APOBEC3G,TRIM25,ZC3HAV1,BATF2,TRIM34,HLA-E,OAS1,HERC5,IRF1,TLR1,IL4R,LILRB1,GBP6,RAB1A,MYD88,REP15,GNLY,FAM111A,BST2,MPO,HLA-A,CD163L1,ACP5,IL10,IL27RA,DEFA1,PLAC8,C5AR1,DHX58,CD86,CD160,TLR6,IFIT3,C19orf66,LTA,IRF8,IGLL5,HAVCR2,IL17RA,IFIT5,APOBEC3F,MX1,FCER1G,TIRAP,BATF,CD4,TRDC,SLC35B3,IFITM1,IRF5,OAS3,OAS2,NLRC5,IL33,TNFSF8,TRIM22,SLFN11,FGR,EIF2AK2,GBP1,TLR4,NOD2,I…	172	0.476454	ABCC9,ABCF3,ACIN1,ACP5,ADAM17,ADAMTS5,ADAR,ADARB1,ADM,AGBL4,AGBL5,AIMP1,ALKBH5,ALPK1,ANG,ANKRD17,ANXA3,ANXA5,APOBEC3A,APOBEC3B,APOBEC3C,APOBEC3D,APOBEC3F,APOBEC3G,APP,ASB2,ATG7,ATP1B1,B2M,BATF,BATF2,BCL2,BCL3,BECN1,BNIP3,BNIP3L,BST2,C10orf99,C19orf66,C1orf210,C5AR1,CALCOCO2,CARD9,CCDC36,CCL20,CCR2,CD160,CD163L1,CD207,CD36,CD4,CD40,CD86,CD8A,CD93,CEBPB,CFP,CHAF1B,CHGA,CHST3,CLDN7,CLEC4E,CLEC6A,CLE…	Human
NCB-CB	_tstat	within each collection	BP: GO biological process	GO_FATTY_ACID_BETA_OXIDATION	0.000471	0.00530695	-0.543798	-2.20976	0	50	SESN2,HADHB,DECR1,CPT1B,ETFA,IVD,HADHA,HADH,ABCD1,SCP2,CRAT,PEX7,ABCD2,ECHS1,ACADS,CROT,ACAD11,BDH2,ECI2,AMACR,ECI1,ACAA1,NUDT19,CPT1A,ECH1,HSD17B4,CPT2,ETFDH,PEX2,ACADM,GCDH,ACAD8,SLC25A17,ABCD3,ACOX2	35	0.7	ABCD1,ABCD2,ABCD3,ACAA1,ACAD10,ACAD11,ACAD8,ACAD9,ACADL,ACADM,ACADS,ACADSB,ACADVL,ACOT8,ACOX1,ACOX2,ACOX3,ACOXL,ADIPOQ,AMACR,BDH2,CPT1A,CPT1B,CPT1C,CPT2,CRAT,CROT,DECR1,ECH1,ECHS1,ECI1,ECI2,EHHADH,ETFA,ETFB,ETFDH,GCDH,HADH,HADHA,HADHB,HSD17B4,IVD,NUDT19,PEX2,PEX7,PPARD,SCP2,SESN2,SLC25A17,SLC27A2	Human
NCB-CB	_tstat	within each collection	BP: GO biological process	GO_CELL_ACTIVATION	0.00076	0.00566663	-0.382284	-2.20646	0	497	SNAP23,NBN,CD40,B2M,RAB27A,BATF2,ATP11C,NHEJ1,LYL1,NTRK1,PSMB10,VAV1,PRKCQ,ARRB1,CASP8,HLA-E,MICB,POU2F2,IRF1,FLT3LG,LAT2,TLR1,BANK1,STK11,LILRB1,VAMP8,CD74,CD28,BTK,RASGRP1,CCL3,BST2,AKAP17A,IL15,CSF1,GP1BA,IL10,CARD11,TBX21,MILR1,SMAD3,LAT,HHEX,APBB1IP,CD180,PLEK,BATF3,HPRT1,CD86,AIF1,MEGF10,VAMP7,NKAP,HAVCR2,P2RX4,IL17RA,FCER1G,TCF7,BATF,WAS,CD4,ZAP70,C1GALT1C1,FNIP1,SH2D1B,BTN3A1,MS4A1,CRTAM,…	210	0.422535	ABL1,ACTB,ACTG1,ACTN1,ADA,ADAM10,ADAM17,ADAM9,ADAMTS13,ADRA2A,ADRA2B,ADRA2C,AIF1,AKAP17A,AKT1,ANXA1,ANXA3,APBB1IP,APOLD1,ARRB1,ARRB2,ATG5,ATM,ATP11C,ATP7A,AXL,AZI2,B2M,BAK1,BANK1,BATF,BATF2,BATF3,BAX,BCL11B,BCL2,BCL3,BCL6,BLNK,BLOC1S3,BMPER,BMX,BRAF,BST2,BTK,BTN3A1,C1GALT1C1,CADM1,CAMK4,CARD11,CASP8,CAST,CBFB,CCL19,CCL21,CCL3,CCL5,CCND3,CCR7,CD151,CD180,CD1C,CD1D,CD2,CD24,CD244,CD276,CD28,CD3D,CD…	Human
NCB-CB	_tstat	within each collection	BP: GO biological process	GO_B_CELL_MEDIATED_IMMUNITY	0.000499	0.00530695	-0.479545	-2.2014	0	91	NBN,C2,POU2F2,IGLV7-43,IL4R,CD74,IGHV2-70,IGKV1D-33,IGKV3D-20,IGKV3D-11,IGLL5,FCER1G,BATF,TRDC,C1QA,IGLC1,IGKV1-5,C1QC,IGHG1,TLR8,INPP5D,CD27,BCL3,CR1,CD40LG,IGHG4,C1QB,IGLC3,IGKV4-1,IGKC,IGLC2,GCNT3,IGHV3-23,FAS,IRF7,IGHG2,IGKV3-20,SLA2,C7,IGHM,IGHG3,SERPING1,LIG4,C1QBP,PRKCD,IGKV2-40,HLA-DRB1,IGHA1,C1RL,GAPT,IGHE,IGLC7	52	0.571429	BATF,BCL10,BCL3,C1QA,C1QB,C1QBP,C1QC,C1R,C1RL,C1S,C2,C3,C4A,C4B,C4BPA,C4BPB,C5,C6,C7,C8A,C8B,C8G,C9,CD27,CD40LG,CD46,CD55,CD74,CFI,CLU,CR1,CR2,ERCC1,EXO1,EXOSC3,EXOSC6,FAS,FCER1G,GAPT,GCNT3,HLA-DQB1,HLA-DRB1,HLA-DRB5,HSPD1,IGHA1,IGHA2,IGHD,IGHE,IGHG1,IGHG2,IGHG3,IGHG4,IGHM,IGHV2-70,IGHV3-23,IGKC,IGKV1-5,IGKV1D-33,IGKV2-40,IGKV3-20,IGKV3D-11,IGKV3D-20,IGKV4-1,IGLC1,IGLC2,IGLC3,IGLC7,IGLL5,IGLV7-43…	Human
NCB-CB	_tstat	within each collection	BP: GO biological process	GO_PROTEIN_ACTIVATION_CASCADE	0.000496	0.00530695	-0.479552	-2.19482	0	90	C2,IGLV7-43,VSIG4,IGHV2-70,GP1BA,IGKV1D-33,IGKV3D-20,IGKV3D-11,IGLL5,TRDC,C1QA,FCN1,IGLC1,IGKV1-5,C1QC,IGHG1,CR1,IGHG4,C1QB,IGLC3,IGKV4-1,IGKC,IGLC2,CFP,IGHV3-23,IGHG2,F8,KLKB1,F3,IGKV3-20,C7,IGHM,VWF,IGHG3,SERPING1,A2M,F12,C1QBP,CFD,IGKV2-40,IGHA1,COLEC10,C1RL,IGHE,IGLC7,FCN2,TFPI	47	0.522222	A2M,APOH,C1QA,C1QB,C1QBP,C1QC,C1R,C1RL,C1S,C2,C3,C4A,C4B,C4BPA,C4BPB,C5,C6,C7,C8A,C8B,C8G,C9,CD46,CD55,CFB,CFD,CFH,CFHR1,CFHR5,CFI,CFP,CLU,COLEC10,COLEC11,CR1,CR2,F10,F11,F12,F2,F3,F7,F8,F9,FBLN1,FCN1,FCN2,FCN3,FGA,FGB,FGG,GP1BA,GP1BB,IGHA1,IGHA2,IGHD,IGHE,IGHG1,IGHG2,IGHG3,IGHG4,IGHM,IGHV2-70,IGHV3-23,IGKC,IGKV1-5,IGKV1D-33,IGKV2-40,IGKV3-20,IGKV3D-11,IGKV3D-20,IGKV4-1,IGLC1,IGLC2,IGLC3,IGLC7,IG…	Human
NCB-CB	_tstat	within each collection	BP: GO biological process	GO_CYTOKINE_SECRETION	0.000449	0.00530695	-0.585792	-2.19461	0	35	AIM2,LILRB1,BTN3A2,RAB1A,TLR6,BTN3A1,TLR4,NOD2,ABCA1,GBP5,TLR2,CCR7,NOS2,S100A13,LCP2,CD36,NLRP3,LYN,NLRC4	19	0.542857	ABCA1,AGT,AIM2,BTN3A1,BTN3A2,CCL19,CCR7,CD36,CHI3L1,F2RL1,FOXP1,GATA3,GBP5,GPAM,HMGB1,LCP2,LILRB1,LYN,NLRC4,NLRP3,NOD2,NOS2,NOTCH1,NOX5,NR1H4,PNP,RAB1A,RBPJ,S100A13,TLR2,TLR4,TLR6,TREM1,TRIM27,VTCN1	Human
NCB-CB	_tstat	within each collection	BP: GO biological process	GO_REGULATION_OF_B_CELL_PROLIFERATION	0.000468	0.00530695	-0.539862	-2.1873	0	49	CD40,BST1,TNFSF13B,CASP3,CD74,TNFRSF13B,IL10,CARD11,NFATC2,NCKAP1L,TIRAP,ADA,TLR4,SASH3,CD300A,MEF2C,PTPRC,INPP5D,IL7,TNFRSF4,LYN,GPR183,MZB1,CD38,IKZF3,CTLA4	26	0.530612	ADA,AHR,ATM,BCL2,BCL6,BST1,CARD11,CASP3,CD300A,CD38,CD40,CD74,CD81,CDKN1A,CDKN2A,CLCF1,CTLA4,GPR183,IKZF3,IL10,IL7,INPP5D,IRS2,LYN,MEF2C,MIF,MNDA,MZB1,NCKAP1L,NFATC2,PAWR,PELI1,PKN1,PRDM1,PTPRC,RC3H1,SASH3,SLC39A10,TCF3,TICAM1,TIRAP,TLR4,TNFRSF13B,TNFRSF13C,TNFRSF21,TNFRSF4,TNFSF13B,VAV3,WNT3A	Human
NCB-CB	_tstat	within each collection	BP: GO biological process	GO_RESPONSE_TO_PROTOZOAN	0.000438	0.00530695	-0.693117	-2.18633	0	18	CD40,BATF2,IL4R,IL10,IRF8,BATF,BCL3,SPN,LYST,IRF4,CLEC7A	11	0.611111	BATF,BATF2,BCL3,CD40,CLEC7A,HRAS,IFNG,IL10,IL12A,IL4R,IL6,IRF4,IRF8,LYST,SLC11A1,SPN,TSPAN32,VTCN1	Human
NCB-CB	_tstat	within each collection	BP: GO biological process	GO_COMPLEMENT_ACTIVATION	0.000484	0.00530695	-0.502506	-2.18306	0	69	C2,IGLV7-43,VSIG4,IGHV2-70,IGKV1D-33,IGKV3D-20,IGKV3D-11,IGLL5,TRDC,C1QA,FCN1,IGLC1,IGKV1-5,C1QC,IGHG1,CR1,IGHG4,C1QB,IGLC3,IGKV4-1,IGKC,IGLC2,CFP,IGHV3-23,IGHG2,IGKV3-20,C7,IGHM,IGHG3,SERPING1,C1QBP,CFD,IGKV2-40,IGHA1,COLEC10,C1RL,IGHE,IGLC7,FCN2	39	0.565217	C1QA,C1QB,C1QBP,C1QC,C1R,C1RL,C1S,C2,C3,C4A,C4B,C4BPA,C4BPB,C5,C6,C7,C8A,C8B,C8G,C9,CD46,CD55,CFB,CFD,CFH,CFHR1,CFHR5,CFI,CFP,CLU,COLEC10,COLEC11,CR1,CR2,FCN1,FCN2,FCN3,IGHA1,IGHA2,IGHD,IGHE,IGHG1,IGHG2,IGHG3,IGHG4,IGHM,IGHV2-70,IGHV3-23,IGKC,IGKV1-5,IGKV1D-33,IGKV2-40,IGKV3-20,IGKV3D-11,IGKV3D-20,IGKV4-1,IGLC1,IGLC2,IGLC3,IGLC7,IGLL5,IGLV7-43,MASP1,MASP2,MBL2,SERPING1,SUSD4,TRDC,VSIG4	Human
NCB-CB	_tstat	within each collection	BP: GO biological process	GO_POSITIVE_REGULATION_OF_B_CELL_PROLIFERATION	0.00045	0.00530695	-0.600006	-2.17665	0	31	CD40,BST1,TNFSF13B,CD74,CARD11,NFATC2,NCKAP1L,TIRAP,ADA,TLR4,SASH3,MEF2C,PTPRC,IL7,TNFRSF4,GPR183,CD38	17	0.548387	ADA,BCL2,BCL6,BST1,CARD11,CD38,CD40,CD74,CD81,CDKN1A,CLCF1,GPR183,IL7,IRS2,MEF2C,MIF,NCKAP1L,NFATC2,PELI1,PTPRC,SASH3,SLC39A10,TCF3,TICAM1,TIRAP,TLR4,TNFRSF13C,TNFRSF4,TNFSF13B,VAV3,WNT3A	Human
NCB-CB	_tstat	within each collection	BP: GO biological process	GO_REGULATION_OF_INTERLEUKIN_2_BIOSYNTHETIC_PROCESS	0.000875	0.00642343	-0.712524	-2.17439	1	16	PRKCQ,CD28,CARD11,CD86,CD4,CD80,IL1B,SFTPD,CD3E,LAG3,IRF4,FOXP3	12	0.75	CARD11,CARD9,CD276,CD28,CD3E,CD4,CD80,CD86,FOXP3,GLMN,IL1B,IRF4,LAG3,PRKCQ,SFTPD,STAT5B	Human
NCB-CB	_tstat	within each collection	BP: GO biological process	GO_RESPONSE_TO_MOLECULE_OF_BACTERIAL_ORIGIN	0.000628	0.00533609	-0.398451	-2.17206	0	290	MAPK9,CD40,NFKB1,B2M,TNFRSF14,TRIB1,NR1H3,CASP3,CASP8,TLR1,LILRB1,TICAM2,IRAK2,CCL3,COMT,MPO,STAP1,ACP5,IL10,LY96,CD180,C5AR1,CD86,TLR6,LTA,IRF8,HAVCR2,NOS3,TIRAP,FASLG,MAPK14,IRF5,RPS6KA3,CASP1,EIF2AK2,PTPN22,TLR4,NOD2,TNIP3,TNFRSF11A,DUSP10,NR1D1,MTDH,IFNAR1,CD80,RIPK2,TNFRSF1B,CXCL11,CNR2,ABCA1,CMPK2,SELP,JAK2,KLRK1,TLR2,MEF2C,LILRB2,IL1B,REN,XBP1,EDNRB,CD27,CCR7,TNFRSF11B,IL18,CD14,CD6,P2RX7,…	127	0.437931	ABCA1,ABL1,ABR,ACP5,ADAM17,ADAM9,ADH5,ADM,AKIRIN2,AKT1,ALAD,ALPL,APOB,ARG1,ASS1,AXL,B2M,BCL10,BCR,BYSL,C4B,C5AR1,CARD9,CASP1,CASP3,CASP8,CASP9,CCL2,CCL20,CCL3,CCL5,CCR2,CCR5,CCR7,CD14,CD180,CD24,CD27,CD36,CD40,CD6,CD80,CD86,CDC73,CDK19,CEBPB,CHUK,CMPK2,CNP,CNR1,CNR2,COMT,CPEB1,CPS1,CTR9,CTSG,CX3CR1,CXCL1,CXCL10,CXCL11,CXCL13,CXCL16,CXCL2,CXCL3,CXCL5,CXCL6,CXCL9,CYP17A1,CYP1A1,CYP1A2,CYP27B1,DAB2I…	Human
NCB-CB	_tstat	within each collection	BP: GO biological process	GO_POSITIVE_REGULATION_OF_INTERLEUKIN_12_PRODUCTION	0.000447	0.00530695	-0.601506	-2.16997	0	30	CD40,IRF1,IRF8,LTB,TIRAP,MAPK14,IRF5,TLR4,RIPK2,TLR2,CCR7,CD40LG,MAPK11,HLA-G,CD36,AGER,TLR3,RELA,LGALS9,IL23A,CCL19,IFNG,TNFSF9	23	0.766667	AGER,CCL19,CCR7,CD36,CD40,CD40LG,HLA-G,HMGB1,HSPD1,IDO1,IFNG,IL23A,IRF1,IRF5,IRF8,LGALS9,LTB,MAPK11,MAPK14,PLCB1,RELA,RIPK2,TIRAP,TLR2,TLR3,TLR4,TLR9,TNFSF4,TNFSF9,TRAF6	Human
NCB-CB	_tstat	within each collection	BP: GO biological process	GO_POSITIVE_REGULATION_OF_CYTOKINE_PRODUCTION	0.000642	0.00533609	-0.393512	-2.16841	0	321	MAPK9,CD40,NFKB1,B2M,TNFRSF14,GSDMD,ZC3HAV1,GPSM3,PRKCQ,HLA-E,IL1RL2,IRF1,CCDC88B,CD274,TLR1,C3AR1,AIM2,IL4R,CD74,TICAM2,CD28,MYD88,RASGRP1,CCL3,IL15,HLA-A,CD58,IL10,IL27RA,CARD11,HLA-DPA1,LY96,SMAD3,C5AR1,DHX58,CD86,TLR6,LTA,IRF8,HAVCR2,IL17RA,FCER1G,LTB,TIRAP,CD4,POLR2E,HPSE,MAPK14,CSF1R,CRTAM,IRF5,IL33,FGR,CASP1,EIF2AK2,PTPN22,TLR4,SASH3,NOD2,NFAM1,HTR2B,IFNAR1,CD80,IL12RB1,FCN1,RIPK2,SLAMF6,G…	144	0.448598	ABL1,ADAM17,ADAM8,ADIPOQ,ADORA2B,ADRA2A,AFAP1L2,AGER,AGPAT1,AGPAT2,AGT,AGTR2,AIM2,AKIRIN2,ALOX15B,ANXA1,APOA2,ARFGEF2,ARHGEF2,ARNT,ATF2,ATF4,ATP6AP2,B2M,BCL10,BCL3,BRCA1,C1QTNF3,C3,C3AR1,C5,C5AR1,CADM1,CARD11,CARD8,CARD9,CASP1,CCBE1,CCDC88B,CCL19,CCL2,CCL20,CCL3,CCR2,CCR7,CD14,CD2,CD244,CD274,CD276,CD28,CD34,CD36,CD3E,CD4,CD40,CD40LG,CD46,CD58,CD6,CD74,CD80,CD83,CD86,CEBPB,CEBPG,CLEC4E,CLEC5A,CLE…	Human
NCB-CB	_tstat	within each collection	BP: GO biological process	GO_POSITIVE_REGULATION_OF_NATURAL_KILLER_CELL_MEDIATED_IMMUNITY	0.000438	0.00530695	-0.687288	-2.16795	0	18	VAV1,HLA-E,NCR3,RASGRP1,SH2D1B,CRTAM,SLAMF6,KLRK1,SH2D1A,LAG3,LAMP1,KLRC4-KLRK1,STAT5B,AP1G1,CD226	15	0.833333	AP1G1,CADM1,CD226,CRTAM,HLA-E,IL12A,KLRC4-KLRK1,KLRK1,LAG3,LAMP1,NCR3,PVR,RASGRP1,SH2D1A,SH2D1B,SLAMF6,STAT5B,VAV1	Human
NCB-CB	_tstat	within each collection	BP: GO biological process	GO_NECROTIC_CELL_DEATH	0.000449	0.00530695	-0.611916	-2.16297	0	28	PPIF,CYLD,TRPM7,MLKL,TICAM2,MAP3K5,LY96,PYGL,FASLG,CASP1,TLR4,RIPK3,RIPK1,CD14	14	0.5	ALKBH7,BAX,BIRC2,CASP1,CD14,CYLD,DNM1L,FADD,FAS,FASLG,IRF3,LY96,MAP3K5,MLKL,PGAM5,PPIF,PYGL,RIPK1,RIPK3,SIRT2,TICAM1,TICAM2,TLR3,TLR4,TMEM123,TNF,TRAF2,TRPM7	Human
NCB-CB	_tstat	within each collection	BP: GO biological process	GO_POSITIVE_REGULATION_OF_TUMOR_NECROSIS_FACTOR_SUPERFAMILY_CYTOKINE_PRODUCTION	0.000477	0.00530695	-0.525831	-2.16021	0	53	HLA-E,TLR1,RASGRP1,CCL3,LY96,CD86,HAVCR2,FCER1G,TIRAP,TLR4,SASH3,NOD2,RIPK2,JAK2,TLR2,RIPK1,CD14,SPN,PTAFR,CCR2,TNFRSF8,CD36,PYCARD,ADAM8,PIK3R1,TLR3,LGALS9,CYBA,IL23A,CD2,CCL19,ARFGEF2,IFNG	33	0.622642	ADAM8,ARFGEF2,ARHGEF2,CARD9,CCL19,CCL2,CCL3,CCR2,CD14,CD2,CD36,CD86,CLU,CYBA,FADD,FCER1G,HAVCR2,HDAC2,HLA-E,HMGB1,HSPB1,IFNG,IL23A,JAK2,LBP,LGALS9,LY96,MAPKAPK2,MAVS,NCL,NFATC4,NOD1,NOD2,PIK3R1,PTAFR,PYCARD,RASGRP1,RIPK1,RIPK2,SASH3,SPN,SPON2,THBS1,TICAM1,TIRAP,TLR1,TLR2,TLR3,TLR4,TLR9,TNFRSF8,TWIST1,ZBTB20	Human
NCB-CB	_tstat	within each collection	BP: GO biological process	GO_NEGATIVE_REGULATION_OF_LEUKOCYTE_MEDIATED_IMMUNITY	0.000454	0.00530695	-0.547311	-2.15999	0	43	HFE,HLA-E,LILRB1,BST2,TAP1,HLA-A,HLA-B,HAVCR2,CD84,SERPINB9,CD300A,SLAMF1,PTPRC,CR1,SPN,CCR2,BCR,FOXP3,HMOX1,ARRB2,JAK3,PTPN6,LGALS9	23	0.534884	ABR,ARRB2,BCL6,BCR,BST2,C4BPA,C4BPB,CCR2,CD300A,CD84,CEACAM1,CLEC4G,CR1,DUSP22,FOXF1,FOXJ1,FOXP3,HAVCR2,HFE,HLA-A,HLA-B,HLA-E,HMOX1,IGF2,IL13RA2,IL20RB,IL7R,JAK3,LGALS9,LILRB1,MICA,NDFIP1,PPP3CB,PTPN6,PTPRC,RABGEF1,SERPINB9,SLAMF1,SPN,SUSD4,TAP1,THOC1,XCL1	Human
NCB-CB	_tstat	within each collection	BP: GO biological process	GO_LEUKOCYTE_DIFFERENTIATION	0.000609	0.00532127	-0.402578	-2.15922	0	251	B2M,CASP10,BATF2,ATP11C,NHEJ1,LYL1,NTRK1,VAV1,CASP8,SNX10,POU2F2,IRF1,FLT3LG,STK11,PIR,LILRB1,CD74,CD28,LRRK1,IL15,CSF1,ACP5,IL10,CARD11,TBX21,HHEX,BATF3,CD86,NKAP,FCER1G,TCF7,BATF,CD4,ZAP70,FNIP1,MAPK14,CSF1R,ITK,CD3D,ADA,TNFSF8,PTPN22,LCK,SATB1,MFNG,DOCK2,ITGA4,NFAM1,TNFRSF11A,THEMIS,GAB3,FLT3,SLAMF6,SPI1,RIPK3,RAG1,MEF2C,IKZF1,SLAMF1,PTPRC,CBFA2T3,CCR7,BCL3,LTBR,CD40LG,PLA2G2D,VCAM1,EOMES,IL7,…	117	0.466135	ABL1,ACP5,ADA,ADAM17,ANXA1,ANXA2,ATG5,ATM,ATP11C,ATP7A,AXL,AZI2,B2M,BAK1,BATF,BATF2,BATF3,BAX,BCL11B,BCL2,BCL3,BCL6,BLNK,BMP4,BMX,BRAF,CAMK4,CARD11,CASP10,CASP8,CBFA2T3,CBFB,CCL19,CCR7,CD109,CD1D,CD28,CD3D,CD3E,CD4,CD40LG,CD74,CD79A,CD79B,CD86,CD8A,CDC42,CDK6,CEBPA,CEBPG,CHD7,CLCF1,CLEC4E,CMTM7,CR2,CSF1,CSF1R,CTNNB1,DCLRE1C,DHRS2,DLL1,DLL4,DNAJA3,DOCK2,EFNA2,EGR1,EIF2AK1,EOMES,EP300,EPHA2,F2RL1,F…	Human
NCB-CB	_tstat	within each collection	BP: GO biological process	GO_TOLL_LIKE_RECEPTOR_4_SIGNALING_PATHWAY	0.000438	0.00530695	-0.683739	-2.15675	0	18	TICAM2,PIK3AP1,LY96,TIRAP,ITGAM,ITGB2,TLR4,TNIP3,RIPK2,CD14,NFKBIA,LGALS9	12	0.666667	CD14,IRAK1,ITGAM,ITGB2,LBP,LGALS9,LY96,NFKBIA,NR1H4,PIK3AP1,PRKCE,RIPK2,S100A14,TICAM2,TIRAP,TLR4,TNIP3,TRIL	Human
NCB-CB	_tstat	within each collection	BP: GO biological process	GO_POSITIVE_T_CELL_SELECTION	0.00044	0.00530695	-0.66429	-2.15483	0	20	STK11,CD74,BATF,ZAP70,CD3D,DOCK2,THEMIS,SLAMF6,LY9,IRF4,FOXP3,STAT6	12	0.6	BATF,BCL11B,BCL2,BRAF,CD3D,CD74,DOCK2,FOXP3,IL6,IRF4,ITPKB,LY9,SHH,SLAMF6,SRF,STAT6,STK11,THEMIS,ZAP70,ZFPM1	Human
NCB-CB	_tstat	within each collection	BP: GO biological process	GO_REGULATION_OF_CYTOKINE_PRODUCTION	0.000751	0.00561144	-0.373285	-2.15261	0	486	MAPK9,CD40,UBA7,NFKB1,B2M,TNFRSF14,GSDMD,TRIM25,ZC3HAV1,UBE2L6,GPSM3,HFE,PRKCQ,ARRB1,HLA-E,IL1RL2,HERC5,IRF1,CCDC88B,CD274,TLR1,C3AR1,AIM2,IL4R,BANK1,CYLD,LILRB1,CD74,TRIM21,TICAM2,BIRC3,CD28,MYD88,BTK,NLRX1,RASGRP1,PDCD1LG2,CCL3,BST2,SIGIRR,IL15,HLA-A,CD58,ACP5,DTX4,IL10,IL27RA,CARD11,HLA-B,HLA-DPA1,SRGN,LY96,SMAD3,C5AR1,DHX58,NCKAP1L,CD86,ANXA4,TLR6,UBASH3A,LTA,IRF8,HAVCR2,IL17RA,FCER1G,LTB,TIR…	209	0.430041	ABL1,ACE2,ACP5,ADAM17,ADAM8,ADIPOQ,ADORA2B,ADRA2A,AFAP1L2,AGER,AGPAT1,AGPAT2,AGT,AGTR2,AIM2,AKIRIN2,ALOX15B,ANGPT1,ANKRD17,ANKRD2,ANXA1,ANXA4,APOA1,APOA2,APOD,ARFGEF2,ARHGEF2,ARNT,ARRB1,ARRB2,ASB1,ATF2,ATF4,ATG5,ATP6AP2,AXL,B2M,BANK1,BCL10,BCL3,BCL6,BIRC2,BIRC3,BRCA1,BST2,BTK,BTN2A2,C1QBP,C1QTNF3,C3,C3AR1,C5,C5AR1,CADM1,CARD11,CARD8,CARD9,CASP1,CCBE1,CCDC88B,CCL19,CCL2,CCL20,CCL3,CCR2,CCR7,CD14,C…	Human
NCB-CB	_tstat	within each collection	BP: GO biological process	GO_POSITIVE_REGULATION_OF_ALPHA_BETA_T_CELL_PROLIFERATION	0.000438	0.00530695	-0.682282	-2.15215	0	18	HLA-E,CD28,HLA-A,ZAP70,CD80,RIPK2,RASAL3,IL18,EBI3,CD3E,CCR2,CD244,LGALS9,IL23A	14	0.777778	CCR2,CD244,CD28,CD3E,CD55,CD80,EBI3,HLA-A,HLA-E,IL18,IL23A,LGALS9,RASAL3,RIPK2,SYK,TNFSF4,XCL1,ZAP70	Human
NCB-CB	_tstat	within each collection	BP: GO biological process	GO_HUMORAL_IMMUNE_RESPONSE	0.000533	0.00530695	-0.436887	-2.14682	0	134	B2M,BST1,C2,PSMB10,TFEB,HLA-E,POU2F2,IGLV7-43,VSIG4,IGHV2-70,CD28,PAX5,BST2,HLA-A,IGKV1D-33,DEFA1,IGKV3D-20,LTA,IGKV3D-11,IGLL5,TRDC,MS4A1,C1QA,FCN1,IGLC1,IGKV1-5,C1QC,MEF2C,IGHG1,RPL39,BCL3,TFE3,POU2AF1,EBI3,CR1,IGHG4,C1QB,IL7,SH2D1A,IGLC3,IGKV4-1,IGKC,IGLC2,GPR183,BLNK,CFP,LY86,PDCD1,IGHV3-23,FAU,IGHG2,TNF,DMBT1,GPI,TREM1,IFNG,IGKV3-20,CCR6,TNFRSF21,C7,IGHM,IGHG3,SERPING1,CD83	64	0.477612	ADM,ANG,APP,B2M,BCL2,BCL3,BLNK,BST1,BST2,C1QA,C1QB,C1QBP,C1QC,C1R,C1RL,C1S,C2,C3,C4A,C4B,C4BPA,C4BPB,C5,C6,C7,C8A,C8B,C8G,C9,CCL2,CCR6,CD28,CD46,CD55,CD83,CFB,CFD,CFH,CFHR1,CFHR5,CFI,CFP,CLU,COLEC10,COLEC11,CR1,CR2,DEFA1,DEFB1,DMBT1,EBI3,EXO1,FAU,FCN1,FCN2,FCN3,FGA,FGB,FOXJ1,GATA3,GPI,GPR183,HIST1H2BJ,HIST1H2BK,HIST2H2BE,HLA-A,HLA-DQB1,HLA-DRB1,HLA-DRB5,HLA-E,IFNG,IGHA1,IGHA2,IGHD,IGHE,IGHG1,IGHG…	Human
NCB-CB	_tstat	within each collection	BP: GO biological process	GO_REGULATION_OF_LEUKOCYTE_DEGRANULATION	0.000451	0.00530695	-0.556333	-2.14658	0	39	FES,IL4R,VAMP8,VAMP7,FCER1G,ZAP70,CD84,FGR,RAC2,CD300A,SNX6,PTAFR,CCR2,UNC13D,BCR,LYN,LAMP1,PRAM1,HMOX1,STX4,LGALS9,GAB2,AP1G1	23	0.589744	ABR,ADORA2B,AP1G1,BCR,C12orf4,CCR2,CD300A,CD84,CEACAM1,F2RL1,FCER1A,FCER1G,FER,FES,FGR,FOXF1,GAB2,HMOX1,IL13RA2,IL4R,LAMP1,LGALS9,LYN,PDPK1,PRAM1,PTAFR,RABGEF1,RAC2,SNX4,SNX6,STX4,STXBP2,SYK,UNC13D,VAMP2,VAMP3,VAMP7,VAMP8,ZAP70	Human
NCB-CB	_tstat	within each collection	BP: GO biological process	GO_HUMORAL_IMMUNE_RESPONSE_MEDIATED_BY_CIRCULATING_IMMUNOGLOBULIN	0.000477	0.00530695	-0.501557	-2.14124	0	62	C2,IGLV7-43,IGHV2-70,IGKV1D-33,IGKV3D-20,IGKV3D-11,IGLL5,TRDC,C1QA,IGLC1,IGKV1-5,C1QC,IGHG1,BCL3,CR1,IGHG4,C1QB,IGLC3,IGKV4-1,IGKC,IGLC2,IGHV3-23,IGHG2,IGKV3-20,C7,IGHM,IGHG3,SERPING1,C1QBP,IGKV2-40,HLA-DRB1,IGHA1,C1RL,IGHE,IGLC7	35	0.564516	BCL3,C1QA,C1QB,C1QBP,C1QC,C1R,C1RL,C1S,C2,C3,C4A,C4B,C4BPA,C4BPB,C5,C6,C7,C8A,C8B,C8G,C9,CD46,CD55,CFI,CLU,CR1,CR2,EXO1,HLA-DQB1,HLA-DRB1,HLA-DRB5,IGHA1,IGHA2,IGHD,IGHE,IGHG1,IGHG2,IGHG3,IGHG4,IGHM,IGHV2-70,IGHV3-23,IGKC,IGKV1-5,IGKV1D-33,IGKV2-40,IGKV3-20,IGKV3D-11,IGKV3D-20,IGKV4-1,IGLC1,IGLC2,IGLC3,IGLC7,IGLL5,IGLV7-43,MASP2,MBL2,SERPING1,SUSD4,TRDC,ZP3	Human
NCB-CB	_tstat	within each collection	BP: GO biological process	GO_REGULATION_OF_IMMUNE_EFFECTOR_PROCESS	0.000686	0.00544918	-0.383077	-2.14076	0	370	CD40,B2M,TNFRSF14,APOBEC3G,ZC3HAV1,C2,HFE,VAV1,FES,HLA-E,MICB,HERC5,C3AR1,AIM2,IL4R,LILRB1,VAMP8,CD74,BIRC3,CD28,NCR3,BTK,NLRX1,REP15,RASGRP1,BST2,TAP1,IL15,STAP1,HLA-A,CD163L1,IL10,IL27RA,ELMO1,TBX21,HLA-B,C5AR1,DHX58,CD86,FCER2,LTA,VAMP7,HAVCR2,APOBEC3F,FCER1G,WAS,CD4,ZAP70,SLC35B3,SH2D1B,CRTAM,CD84,IL33,PPM1B,FGR,SERPINB9,EIF2AK2,CD247,AP2A2,LCK,TLR4,SASH3,DOCK2,RAC2,DUSP10,AP1S2,CD80,IL12RB1,…	151	0.408108	A2M,ABR,ACIN1,ADORA2B,AGER,AIM2,ALKBH5,ALPK1,ANGPT1,ANKRD17,ANXA1,ANXA5,AP1B1,AP1G1,AP1M1,AP1M2,AP1S1,AP1S2,AP1S3,AP2A1,AP2A2,AP2B1,AP2M1,AP2S1,APLF,APOA1,APOA2,APOBEC3F,APOBEC3G,ARF1,ARRB2,ASB2,ATG5,ATP1B1,ATP6V1H,B2M,BCL10,BCL6,BCR,BIRC2,BIRC3,BST2,BTK,C12orf4,C1orf210,C1QBP,C2,C3,C3AR1,C4A,C4B,C4BPA,C4BPB,C5,C5AR1,C6,C7,C8A,C8B,C8G,C9,CADM1,CCDC36,CCL19,CCL2,CCR2,CD163L1,CD226,CD244,CD247,CD28…	Human
NCB-CB	_tstat	within each collection	BP: GO biological process	GO_REGULATION_OF_MACROPHAGE_DERIVED_FOAM_CELL_DIFFERENTIATION	0.000447	0.00530695	-0.622887	-2.14039	0	25	MAPK9,NFKB1,NR1H3,CSF1,ABCG1,ABCA1,PRKCH,CETP,PPARG,CD36,NFKBIA,MSR1,ITGB3,PPARA	14	0.56	ABCA1,ABCA5,ABCG1,ADIPOQ,AGT,AGTR1,ALOX15B,APOB,CD36,CETP,CRP,CSF1,ITGAV,ITGB3,LPL,MAPK9,MSR1,NFKB1,NFKBIA,NR1H2,NR1H3,PLA2G2A,PPARA,PPARG,PRKCH	Human
NCB-CB	_tstat	within each collection	BP: GO biological process	GO_REGULATION_OF_CYTOKINE_SECRETION	0.000526	0.00530695	-0.439455	-2.13423	0	126	TNFRSF14,GSDMD,CD274,TLR1,AIM2,IL4R,BANK1,LILRB1,RASGRP1,CCL3,CD58,IL10,SRGN,ANXA4,TLR6,HAVCR2,IL17RA,MAPK14,CSF1R,CRTAM,IL33,FGR,CASP1,PTPN22,GBP1,TLR4,NOD2,HTR2B,IFNAR1,FCN1,IL17RC,TLR2,SLAMF1,IL1B,TLR8,BTN2A2,XBP1,CCR7,CD14,P2RX7,CCR2,MAPK11,TNFRSF9,NLRP3,LYN,PYCARD,FOXP3,TLR10,CD244,PML,LGALS9,CD2,ANGPT1,ZC3H12A,CX3CL1,TNF,PTGER4,DRD2,CCL19,IFNG,CLEC4E,C1QTNF3,TRPV4,LGR4,TNFRSF21	65	0.515873	ABL1,AGTR2,AIM2,ALOX15B,ANGPT1,ANXA1,ANXA4,APOA1,APOA2,ATG5,BANK1,BTN2A2,C1QTNF3,C5,CADM1,CARD8,CASP1,CCL19,CCL3,CCR2,CCR7,CD14,CD2,CD244,CD274,CD276,CD34,CD58,CLEC4E,CLEC5A,CLEC6A,CRP,CRTAM,CSF1R,CX3CL1,DRD2,EZR,F2R,F2RL1,FBLN1,FCN1,FGR,FN1,FOXP1,FOXP3,GAS6,GATA3,GBP1,GLMN,GPAM,GSDMD,HAVCR2,HLA-DRB1,HLA-DRB5,HMGB1,HTR2B,HYAL2,IFNAR1,IFNG,IL10,IL17RA,IL17RB,IL17RC,IL1B,IL1RL1,IL33,IL4R,IL6,IRF3,L…	Human
NCB-CB	_tstat	within each collection	BP: GO biological process	GO_POSITIVE_REGULATION_OF_INFLAMMATORY_RESPONSE	0.000499	0.00530695	-0.456702	-2.12816	0	98	GPSM3,CLOCK,VAMP8,TNIP1,CCL4L2,CCL24,CD28,CCL3,IL15,LTA,VAMP7,IL17RA,FCER1G,IL33,TLR4,NOD2,TNFRSF11A,ETS1,GBP5,JAK2,IL17RC,TLR2,IL1B,CCR7,IL18,CD6,PIK3CG,CCL8,PTGER3,XCL2,CCR2,CCL4,TNFRSF1A,TLR7,AGER,TLR10,CCL7,ADAM8,OSM,CCL5,CCL23,TLR3,IL23A,S100A9,STAT5B,CX3CL1,TNF,PTGER4,CCL13,CCL18,TNFSF11,GPRC5B,KLKB1	53	0.540816	ADAM8,ADORA2B,AGER,AGT,AGTR1,C3,CCL11,CCL13,CCL14,CCL15,CCL16,CCL18,CCL2,CCL23,CCL24,CCL3,CCL4,CCL4L2,CCL5,CCL7,CCL8,CCR2,CCR7,CD28,CD47,CD6,CDK19,CLOCK,CNR1,CREB3L3,CX3CL1,EDNRA,ETS1,F12,FABP4,FCER1A,FCER1G,GBP5,GPRC5B,GPSM3,HYAL2,IDO1,IL15,IL17RA,IL17RB,IL17RC,IL18,IL1B,IL1RL1,IL23A,IL33,IL6,IL6ST,ITGA2,JAK2,KLKB1,LBP,LPL,LTA,MAPK13,NLRP12,NOD2,OSM,OSMR,PDE2A,PIK3CG,PLA2G2A,PLA2G4A,PLA2G7,PTGER…	Human
NCB-CB	_tstat	within each collection	BP: GO biological process	GO_NECROPTOTIC_PROCESS	0.000444	0.00530695	-0.646207	-2.116	0	21	PPIF,CYLD,TRPM7,MLKL,TICAM2,LY96,PYGL,FASLG,TLR4,RIPK3,RIPK1,CD14,SIRT2,TLR3,FAS,TNF	16	0.761905	BIRC2,CD14,CYLD,DNM1L,FADD,FAS,FASLG,LY96,MLKL,PGAM5,PPIF,PYGL,RIPK1,RIPK3,SIRT2,TICAM1,TICAM2,TLR3,TLR4,TNF,TRPM7	Human
NCB-CB	_tstat	within each collection	BP: GO biological process	GO_PURINERGIC_RECEPTOR_SIGNALING_PATHWAY	0.000447	0.00530695	-0.613066	-2.10664	0	25	P2RY6,GPR34,P2RX5,P2RX4,ANO6,ADORA2A,P2RY11,P2RY8,P2RY12,P2RY10,P2RX7,P2RX3,P2RX1,PTAFR,P2RY13,GPR171	16	0.64	ADCY5,ADORA1,ADORA2A,ADORA2B,ADORA3,ANO6,GNAI2,GPR171,GPR34,GPR87,P2RX1,P2RX3,P2RX4,P2RX5,P2RX7,P2RY1,P2RY10,P2RY11,P2RY12,P2RY13,P2RY14,P2RY2,P2RY6,P2RY8,PTAFR	Human
NCB-CB	_tstat	within each collection	BP: GO biological process	GO_FATTY_ACID_CATABOLIC_PROCESS	0.000484	0.00530695	-0.481858	-2.1064	0	71	SESN2,LPIN3,HADHB,DECR1,CPT1B,ETFA,IVD,HADHA,LIPE,HADH,ABCD1,SCP2,CRAT,PEX7,MCEE,ABCD2,FAAH,ECHS1,ACADS,PLA2G15,CROT,ACAD11,LPIN2,BDH2,ECI2,AMACR,ECI1,PEX13,ACAA1,NUDT19,CPT1A,ECH1,HSD17B4,CPT2,SLC27A4,ETFDH,PEX2,ACADM,GCDH,ACAD8,MMAA,SLC25A17,ABCD3,ACOX2,PHYH	45	0.633803	ABCD1,ABCD2,ABCD3,ACAA1,ACAD10,ACAD11,ACAD8,ACAD9,ACADL,ACADM,ACADS,ACADSB,ACADVL,ACOT8,ACOX1,ACOX2,ACOX3,ACOXL,ADIPOQ,ALDH3A2,AMACR,BDH2,CEL,CPT1A,CPT1B,CPT1C,CPT2,CRAT,CROT,CYP4A11,CYP4F12,CYP4F2,CYP4F3,DECR1,ECH1,ECHS1,ECI1,ECI2,EHHADH,ETFA,ETFB,ETFDH,FAAH,GCDH,HACL1,HADH,HADHA,HADHB,HAO1,HSD17B4,IVD,LIPE,LPIN1,LPIN2,LPIN3,MCEE,MMAA,NUDT19,PCCA,PCCB,PEX13,PEX2,PEX7,PHYH,PLA2G15,PPARD,SCP2,SESN…	Human
NCB-CB	_tstat	within each collection	BP: GO biological process	GO_REGULATION_OF_INTERLEUKIN_6_PRODUCTION	0.000492	0.00530695	-0.461119	-2.10577	0	88	ARRB1,IL1RL2,TLR1,BANK1,TICAM2,MYD88,NLRX1,IL10,HLA-B,NCKAP1L,TLR6,HAVCR2,FCER1G,TIRAP,CSK,IL33,PTPN22,TLR4,NOD2,RIPK2,IL17RC,TLR2,LILRB2,SLAMF1,IL1B,INPP5D,XBP1,P2RX7,NLRC3,PTAFR,CCR2,IL6R,CD36,TLR7,PYCARD,FOXP3,ARRB2,TLR3,LGALS9,CYBA,ZC3H12A,TNFAIP3,TNF,IFNG,C1QTNF3,CARD9,TRPV4,TNFSF9	48	0.545455	ADORA2B,AFAP1L2,AKIRIN2,ARHGEF2,ARRB1,ARRB2,BANK1,C1QTNF3,CARD9,CCR2,CD36,CEBPB,CSK,CYBA,DDX58,EREG,F2R,F2RL1,FCER1G,FOXJ1,FOXP3,GAS6,GBA,HAVCR2,HGF,HLA-B,HMGB1,HSPD1,HYAL2,IFNG,IL10,IL17RC,IL1B,IL1RL2,IL33,IL6,IL6R,INPP5D,IRAK3,KLF2,LBP,LGALS9,LILRB2,MAPK13,MAPKAPK2,MYD88,NCKAP1L,NCL,NLRC3,NLRP12,NLRX1,NOD1,NOD2,ORM1,P2RX7,PAEP,PTAFR,PTPN22,PYCARD,RAB7B,RABGEF1,RIPK2,SLAMF1,SOCS5,SPON2,TBC1D23,T…	Human
NCB-CB	_tstat	within each collection	BP: GO biological process	GO_REGULATION_OF_BONE_RESORPTION	0.000447	0.00530695	-0.598346	-2.09797	0	27	TMEM64,IL20RA,CSF1R,CSK,SIGLEC15,INPP5D,TNFRSF11B,P2RX7,ADAM8,CD38,S1PR1,PDK4,ITGB3,PPARGC1B,TNFAIP3,PTGER4,TNFSF11	17	0.62963	ADAM8,ATP6AP1,BGLAP,CA2,CD38,CSF1R,CSK,IL20RA,INPP5D,ITGB3,MC4R,NF1,P2RX7,PDK4,PPARGC1B,PTGER4,S1PR1,SIGLEC15,SPP1,SRC,SYK,TFRC,TMEM64,TNFAIP3,TNFRSF11B,TNFSF11,UBASH3B	Human
NCB-CB	_tstat	within each collection	BP: GO biological process	GO_MYELOID_LEUKOCYTE_ACTIVATION	0.000491	0.00530695	-0.462686	-2.09794	0	85	SNAP23,BATF2,LAT2,TLR1,VAMP8,RASGRP1,CCL3,CSF1,MILR1,LAT,BATF3,CD86,AIF1,VAMP7,HAVCR2,FCER1G,BATF,ZAP70,PI4K2A,TLR4,DOCK2,SPI1,SLAMF1,TLR8,TYROBP,ADAM10,LTBR,PIK3CG,SLC7A2,S100A13,LCP2,LYN,TLR7,IRF4,PYCARD,RHOH	36	0.423529	ADAM10,ADAM9,AIF1,ANXA3,BATF,BATF2,BATF3,CAMK4,CCL3,CCL5,CD244,CD86,CD93,CHGA,CLU,CPLX2,CRTC3,CSF1,CX3CL1,CX3CR1,CXCR2,DHRS2,DOCK2,EDN2,F2RL1,FCER1G,FOXP1,GATA2,HAVCR2,HMGB1,HYAL2,IRF4,JMJD6,JUN,KIT,LAT,LAT2,LBP,LCP2,LTBR,LYN,MILR1,MT1G,NDRG1,NR4A3,PI4K2A,PIK3CD,PIK3CG,PLA2G3,PPBP,PREX1,PRKCD,PRKCE,PSEN1,PYCARD,RASGRP1,RBPJ,RELB,RHOH,S100A13,SBNO2,SLAMF1,SLC11A1,SLC7A2,SNAP23,SNCA,SPI1,STXBP2,STX…	Human
NCB-CB	_tstat	within each collection	BP: GO biological process	GO_REGULATION_OF_INFLAMMATORY_RESPONSE	0.000608	0.00532127	-0.391741	-2.09788	0	248	NFKB1,XIAP,C2,GPSM3,NR1H3,IL1RL2,CLOCK,MGLL,C3AR1,TNFAIP8L2,VAMP8,TNIP1,CCL4L2,BIRC3,CCL24,CD28,MYD88,NLRX1,CCL3,IL15,PIK3AP1,ACP5,IL10,CASP4,SMAD3,C5AR1,LTA,VAMP7,IL17RA,FCER1G,MAPK14,IL33,ADA,CASP1,TLR4,NOD2,GGT1,TNFRSF11A,ETS1,DUSP10,TNFRSF1B,CNR2,GBP5,NLRP6,JAK2,IL17RC,TLR2,SHARPIN,IL1B,EDNRB,SNX6,CCR7,IL18,CD6,NOS2,CR1,HCK,PIK3CG,SLC7A2,PPARG,CCL8,IL2RA,SPN,PTGER3,XCL2,CCR2,CCL4,RICTOR,BCR,T…	122	0.491935	A2M,ABR,ACE2,ACP5,ADA,ADAM8,ADAMTS12,ADIPOQ,ADORA1,ADORA2B,ADRB2,AGER,AGT,AGTR1,AHSG,ANXA1,APCS,APOA1,APOD,APOE,ASH1L,BCL6,BCR,BIRC2,BIRC3,BRD4,C1QBP,C1QTNF3,C2,C3,C3AR1,C4A,C4B,C4BPA,C4BPB,C5,C5AR1,C6,C7,C8A,C8B,C8G,C9,CALCRL,CASP1,CASP4,CCL11,CCL13,CCL14,CCL15,CCL16,CCL18,CCL2,CCL23,CCL24,CCL3,CCL4,CCL4L2,CCL5,CCL7,CCL8,CCR2,CCR7,CD276,CD28,CD46,CD47,CD55,CD59,CD6,CDK19,CFB,CFH,CFI,CFP,CHID1,CL…	Human
NCB-CB	_tstat	within each collection	BP: GO biological process	GO_CHEMOKINE_MEDIATED_SIGNALING_PATHWAY	0.000482	0.00530695	-0.50366	-2.09706	0	57	CCR1,CCL4L2,CCL24,CCL3,CMKLR1,XCR1,CXCL11,CCRL2,CCR7,CCR5,CXCR5,CIB1,CCL8,CXCR6,XCL2,CCR2,CCL4,CCL21,CCL7,CCR10,CXCL9,CCL5,CCL23,THPO,CXCL13,PTK2B,CX3CL1,CXCR3,CCL13,CCL18,CCL19,CXCL10,CCR4,CCR6,CX3CR1,CCR8,CXCL12,CCR3,CCL14,XCL1	40	0.701754	CCL11,CCL13,CCL14,CCL15,CCL16,CCL18,CCL19,CCL2,CCL20,CCL21,CCL22,CCL23,CCL24,CCL3,CCL4,CCL4L2,CCL5,CCL7,CCL8,CCR1,CCR10,CCR2,CCR3,CCR4,CCR5,CCR6,CCR7,CCR8,CCRL2,CIB1,CMKLR1,CX3CL1,CX3CR1,CXCL1,CXCL10,CXCL11,CXCL12,CXCL13,CXCL2,CXCL3,CXCL5,CXCL6,CXCL9,CXCR1,CXCR2,CXCR3,CXCR4,CXCR5,CXCR6,GPR17,GPR75,PPBP,PTK2B,THPO,XCL1,XCL2,XCR1	Human
NCB-CB	_tstat	within each collection	BP: GO biological process	GO_LIPID_OXIDATION	0.00048	0.00530695	-0.484207	-2.09349	0	67	SESN2,HADHB,DECR1,CPT1B,ETFA,MAPK14,PRKAA1,IVD,HADHA,HADH,ABCD1,SCP2,CRAT,PEX7,PPARG,ABCD2,ECHS1,CYP4V2,ACADS,CROT,ACAD11,CYGB,BDH2,ECI2,AMACR,ECI1,PEX13,ACAA1,NUDT19,CPT1A,ECH1,HSD17B4,CPT2,ETFDH,PEX2,ACADM,GCDH,ACAD8	38	0.567164	ABCD1,ABCD2,ABCD3,ACAA1,ACAD10,ACAD11,ACAD8,ACAD9,ACADL,ACADM,ACADS,ACADSB,ACADVL,ACOT8,ACOX1,ACOX2,ACOX3,ACOXL,ACSM1,ADIPOQ,ADIPOR1,ADIPOR2,ALDH3A2,AMACR,BDH2,CPT1A,CPT1B,CPT1C,CPT2,CRAT,CROT,CYGB,CYP4V2,DECR1,ECH1,ECHS1,ECI1,ECI2,EHHADH,ETFA,ETFB,ETFDH,GCDH,HACL1,HADH,HADHA,HADHB,HAO1,HAO2,HSD17B4,IVD,MAPK14,NUDT19,PEX13,PEX2,PEX7,PHYH,PLA2G7,POR,PPARD,PPARG,PPARGC1A,PRKAA1,SCP2,SESN2,SLC25A17,…	Human
NCB-CB	_tstat	within each collection	BP: GO biological process	GO_POSITIVE_REGULATION_OF_CALCIUM_MEDIATED_SIGNALING	0.000446	0.00530695	-0.553171	-2.09231	0	36	P2RX5,CCL3,HINT1,P2RX4,TRAT1,CD4,ZAP70,GSTO1,ADA,CALM3,P2RX3,CIB1,CD3E,CCL4,GSTM2,TRDN	16	0.444444	ADA,AKAP6,ASPH,CALM1,CALM2,CALM3,CCL3,CCL4,CD3E,CD4,CD8A,CDH13,CHP2,CIB1,ERBB3,FCER1A,GSTM2,GSTO1,HAP1,HINT1,HTT,IGF1,JPH2,LMCD1,NRG1,P2RX3,P2RX4,P2RX5,PKD2,SLC9A1,SPPL3,SYK,TRAT1,TRDN,TREM2,ZAP70	Human
NCB-CB	_tstat	within each collection	BP: GO biological process	GO_MONOCARBOXYLIC_ACID_CATABOLIC_PROCESS	0.000499	0.00530695	-0.453153	-2.09014	0	93	SESN2,ALDH5A1,LPIN3,HADHB,DECR1,CPT1B,ETFA,HOGA1,IVD,HADHA,LIPE,HADH,ABCD1,CYP26C1,SCP2,CRAT,PEX7,MCEE,ABCD2,FAAH,ECHS1,ACADS,PLA2G15,GOT2,CROT,ACAD11,XYLB,LPIN2,CRYL1,BDH2,ECI2,AMACR,ECI1,PEX13,ACAA1,NUDT19,CPT1A,ECH1,HSD17B4,CPT2,SLC27A4,ETFDH,PEX2,ACADM,SORD,GCDH,ACAD8	47	0.505376	ABAT,ABCD1,ABCD2,ABCD3,ACAA1,ACAD10,ACAD11,ACAD8,ACAD9,ACADL,ACADM,ACADS,ACADSB,ACADVL,ACOT8,ACOX1,ACOX2,ACOX3,ACOXL,ADIPOQ,AGXT,AGXT2,AKR1A1,AKR1D1,ALDH3A2,ALDH4A1,ALDH5A1,AMACR,BDH2,CEL,CPT1A,CPT1B,CPT1C,CPT2,CRABP1,CRAT,CROT,CRYL1,CYP26A1,CYP26B1,CYP26C1,CYP39A1,CYP4A11,CYP4F12,CYP4F2,CYP4F3,DCXR,DECR1,ECH1,ECHS1,ECI1,ECI2,EHHADH,ETFA,ETFB,ETFDH,FAAH,GCDH,GOT2,HACL1,HADH,HADHA,HADHB,HAO1,HOGA1…	Human
NCB-CB	_tstat	within each collection	BP: GO biological process	GO_REGULATION_OF_SYNCYTIUM_FORMATION_BY_PLASMA_MEMBRANE_FUSION	0.000438	0.00530695	-0.661499	-2.0866	0	18	FLT3LG,IL4R,CD53,NFATC2,EHD1,MAPK14,MYOG,CAMK1,TNFSF14,CXCL9,CXCL10,CFLAR	12	0.666667	ADAM9,CAMK1,CD53,CFLAR,CXCL10,CXCL9,EHD1,EHD2,FLOT1,FLT3LG,GDF15,IL4R,MAPK14,MYOD1,MYOG,NFATC2,RAPGEF3,TNFSF14	Human
NCB-CB	_tstat	within each collection	BP: GO biological process	GO_REGULATION_OF_NF_KAPPAB_IMPORT_INTO_NUCLEUS	0.000454	0.00530695	-0.528172	-2.08446	0	43	PRKCQ,CYLD,IL10,PPM1B,FBXW11,TLR4,TLR2,IL1B,CCDC22,CD27,BCL3,IL18,NFKBIB,NLRP3,TLR7,TNFSF14,NFKBIA,EDA,TLR3,LGALS9,IL23A,ZC3H12A,TNF,PRDX1,CCL19,C1QTNF3	26	0.604651	BCL3,BMP7,C1QTNF3,CCDC22,CCL19,CD27,CYLD,EDA,EDAR,FAF1,FBXW11,G3BP2,GREM1,IL10,IL18,IL18R1,IL1B,IL23A,LGALS9,LITAF,NFKBIA,NFKBIB,NLRP12,NLRP3,PPM1A,PPM1B,PRDX1,PRKCQ,PSMD10,PTGS2,RBCK1,RHOA,SPHK1,TLR2,TLR3,TLR4,TLR7,TLR9,TNF,TNFSF14,TRIP6,ZC3H12A,ZNF268	Human
NCB-CB	_tstat	within each collection	BP: GO biological process	GO_LYMPHOCYTE_DIFFERENTIATION	0.000567	0.00532009	-0.406945	-2.08184	0	176	B2M,ATP11C,NHEJ1,LYL1,NTRK1,VAV1,POU2F2,IRF1,FLT3LG,STK11,CD74,CD28,IL15,IL10,CARD11,TBX21,HHEX,NKAP,FCER1G,TCF7,BATF,CD4,ZAP70,FNIP1,ITK,CD3D,ADA,TNFSF8,PTPN22,LCK,SATB1,MFNG,DOCK2,ITGA4,NFAM1,THEMIS,FLT3,SLAMF6,SPI1,RIPK3,RAG1,IKZF1,SLAMF1,PTPRC,CCR7,BCL3,CD40LG,PLA2G2D,VCAM1,EOMES,IL7,AXL,CD3E,SPN,CD1D,CD79A,LY9,IRF4,GPR183,FOXP3,RHOH,BLNK,ZFP36L2,STAT6,FZD5,JAK3,PIK3R1,BAK1,RSAD2,MERTK,ZNF683…	80	0.454545	ABL1,ADA,ADAM17,ANXA1,ATG5,ATM,ATP11C,ATP7A,AXL,B2M,BAK1,BATF,BAX,BCL11B,BCL2,BCL3,BCL6,BLNK,BMX,BRAF,CARD11,CBFB,CCR7,CD1D,CD28,CD3D,CD3E,CD4,CD40LG,CD74,CD79A,CD79B,CD8A,CDK6,CEBPG,CHD7,CLCF1,CLEC4E,CMTM7,CR2,CTNNB1,DCLRE1C,DLL1,DLL4,DNAJA3,DOCK2,EGR1,EOMES,EP300,FADD,FAS,FCER1G,FLT3,FLT3LG,FNIP1,FOXN1,FOXP1,FOXP3,FUT7,FZD5,FZD7,FZD8,FZD9,GATA3,GLI3,GPR183,HDAC4,HDAC5,HDAC9,HHEX,HMGB1,ID2,IFNG,…	Human
NCB-CB	_tstat	within each collection	BP: GO biological process	GO_REGULATION_OF_T_CELL_MEDIATED_CYTOTOXICITY	0.00088	0.00642343	-0.64136	-2.08045	1	20	B2M,HLA-E,LILRB1,NCR3,HLA-A,HLA-B,IL12RB1,RIPK3,PTPRC,P2RX7,AGER	11	0.55	AGER,B2M,CEACAM1,FADD,HLA-A,HLA-B,HLA-E,IL12A,IL12RB1,IL23A,IL7R,LILRB1,NCR3,P2RX7,PPP3CB,PTPRC,PVR,RIPK3,STX7,XCL1	Human
NCB-CB	_tstat	within each collection	BP: GO biological process	GO_CYTOLYSIS	0.000451	0.00530695	-0.619695	-2.08008	0	23	MICB,APOL1,HPRT1,GZMM,CAPN3,GZMB,GZMH,P2RX7,PRF1,GZMA,LYZ,BAK1,TSTA3,C7	14	0.608696	ALB,APOL1,BAK1,C5,C6,C7,C8A,C8B,C8G,C9,CAPN3,GZMA,GZMB,GZMH,GZMM,HPRT1,LYZ,MICA,MICB,MMD,P2RX7,PRF1,TSTA3	Human
NCB-CB	_tstat	within each collection	BP: GO biological process	GO_ORGANIC_ACID_CATABOLIC_PROCESS	0.000583	0.00532009	-0.400073	-2.07731	0	195	RENBP,DDO,MTRR,SESN2,PCBD1,ALDH5A1,LPIN3,HADHB,CARNS1,DECR1,ACOT4,QPRT,CPT1B,DLD,ETFA,NOS3,MCCC2,HOGA1,AMDHD2,IVD,NPL,HADHA,GLUD2,LIPE,HADH,ABCD1,CYP26C1,THNSL2,OAT,PPM1K,HNMT,NOS2,SCP2,CRAT,PEX7,MCEE,GLUD1,ASRGL1,CBS,KYNU,ABCD2,FAAH,PCYOX1,ECHS1,ACADS,PLA2G15,GOT2,ASL,CROT,QDPR,MTHFS,ACAD11,XYLB,LPIN2,ACAT1,CRYL1,FAH,BDH2,AMT,KMO,ECI2,AMACR,ECI1,NOS1,BCKDK,PEX13,ACAA1,NUDT19,CPT1A,ECH1,HSD17B4,C…	94	0.482051	AADAT,AASS,ABAT,ABCD1,ABCD2,ABCD3,ABHD10,ABHD12,ACAA1,ACAD10,ACAD11,ACAD8,ACAD9,ACADL,ACADM,ACADS,ACADSB,ACADVL,ACAT1,ACMSD,ACOT4,ACOT8,ACOX1,ACOX2,ACOX3,ACOXL,ACSF3,ADIPOQ,ADO,AFMID,AGXT,AGXT2,AHCY,AKR1A1,AKR1D1,ALDH1L1,ALDH1L2,ALDH3A2,ALDH4A1,ALDH5A1,ALDH6A1,ALDH7A1,AMACR,AMDHD1,AMDHD2,AMT,ARG1,ASL,ASPA,ASRGL1,AUH,BCAT1,BCAT2,BCKDHA,BCKDHB,BCKDK,BDH2,CARNS1,CBS,CDO1,CEL,CPT1A,CPT1B,CPT1C,CPT2,C…	Human
NCB-CB	_tstat	within each collection	BP: GO biological process	GO_DEFENSE_RESPONSE_TO_GRAM_POSITIVE_BACTERIUM	0.000473	0.00530695	-0.508941	-2.07691	0	51	B2M,TNFRSF14,HLA-E,MYD88,HLA-A,ACP5,IL27RA,DEFA1,C5AR1,LTA,HAVCR2,TIRAP,TNFSF8,FGR,RIPK2,KLRK1,TLR2,RPL39,P2RX7,IL6R,CD36	21	0.411765	ACP5,ADAM17,ADM,ANG,APP,B2M,C10orf99,C5AR1,CARD9,CD36,CHGA,CRP,CTSG,DEFA1,DEFB1,DROSHA,FAU,FCN2,FGR,HAVCR2,HIST1H2BJ,HIST1H2BK,HIST2H2BE,HLA-A,HLA-E,HMGB2,IL12A,IL27RA,IL6,IL6R,KLRC4-KLRK1,KLRK1,LBP,LTA,MBL2,MYD88,NOD1,NPY,P2RX7,PGLYRP2,PLA2G2A,RIPK2,RPL39,SEH1L,SSC5D,TBK1,TIRAP,TLR2,TNF,TNFRSF14,TNFSF8	Human
NCB-CB	_tstat	within each collection	BP: GO biological process	GO_REGULATION_OF_T_CELL_MEDIATED_IMMUNITY	0.00046	0.00530695	-0.520091	-2.07416	0	45	B2M,HFE,HLA-E,LILRB1,NCR3,HLA-A,HLA-B,WAS,SASH3,IL12RB1,RIPK3,SLAMF1,IL1B,PTPRC,P2RX7,SPN,NLRP3,AGER,FOXP3,FZD5,RSAD2,IL23A	22	0.488889	AGER,B2M,CEACAM1,CLEC4G,DUSP22,FADD,FOXP3,FZD5,GATA3,HFE,HLA-A,HLA-B,HLA-E,HMGB1,HSPD1,IL12A,IL12RB1,IL1B,IL20RB,IL23A,IL7R,LILRB1,MALT1,MAP3K7,NCR3,NLRP3,P2RX7,PPP3CB,PRKCZ,PTPRC,PVR,RIPK3,RSAD2,SASH3,SLAMF1,SPN,STX7,TNFSF4,TRAF2,TRAF6,TRPM4,WAS,XCL1,ZBTB1,ZP3	Human
NCB-CB	_tstat	within each collection	BP: GO biological process	GO_REGULATION_OF_T_HELPER_1_TYPE_IMMUNE_RESPONSE	0.000441	0.00530695	-0.646147	-2.06824	0	19	IL4R,IL27RA,HAVCR2,IL33,CD80,IL12RB1,RIPK2,CCR2,HLX,JAK3,IL23A,IL27,CCL19	13	0.684211	ANXA1,CCL19,CCR2,CD80,HAVCR2,HLX,IL12RB1,IL1RL1,IL23A,IL27,IL27RA,IL33,IL4R,JAK3,RIPK2,SLC11A1,SOCS5,TNFSF4,XCL1	Human
NCB-CB	_tstat	within each collection	BP: GO biological process	GO_POSITIVE_REGULATION_OF_CYSTEINE_TYPE_ENDOPEPTIDASE_ACTIVITY_INVOLVED_IN_APOPTOTIC_SIGNALING_PATHWAY	0.000872	0.00642343	-0.665036	-2.06443	1	17	CASP8,HTRA2,TRADD,SMAD3,FASLG,JAK2,RIPK1,TNFSF10,LGALS9,FAS	10	0.588235	BAX,CASP8,FADD,FAS,FASLG,GSN,HTRA2,JAK2,LGALS9,RIPK1,SMAD3,TFAP4,TNFRSF10A,TNFRSF10B,TNFSF10,TRADD,TRAF2	Human
NCB-CB	_tstat	within each collection	BP: GO biological process	GO_POSITIVE_REGULATION_OF_NATURAL_KILLER_CELL_ACTIVATION	0.000864	0.00639072	-0.687897	-2.06137	1	15	FLT3LG,RASGRP1,IL15,IL18,AXL,LAMP1,CD244,IL23A,STAT5B,AP1G1	10	0.666667	AP1G1,AXL,BLOC1S3,CD244,FLT3LG,GAS6,IL12A,IL15,IL18,IL23A,LAMP1,RASGRP1,STAT5B,TICAM1,ZBTB1	Human
NCB-CB	_tstat	within each collection	BP: GO biological process	GO_LEUKOCYTE_PROLIFERATION	0.00048	0.00530695	-0.476433	-2.05987	0	67	CD40,ACE,PSMB10,LILRB1,IL15,CSF1,IL10,CD180,HPRT1,CD86,BTN3A1,MS4A1,CRTAM,DOCK8,SATB1,TLR4,DOCK2,RIPK2,FLT3,SLAMF6,MEF2C,SLAMF1,PTPRC,P2RX7,EBI3,CD40LG,PIK3CG,TNFRSF4,CD79A,ELF4,TNFSF14	31	0.462687	ABL1,ACE,AZI2,BAX,BCL2,BTN3A1,CADM1,CCND3,CD151,CD180,CD40,CD40LG,CD79A,CD86,CLU,CR2,CRTAM,CSF1,DOCK2,DOCK8,EBI3,ELF4,F2RL1,FKBP1B,FLT3,FYN,GAPT,HELLS,HPRT1,HSPD1,IL10,IL15,IL23A,IL7R,IMPDH1,IMPDH2,KIT,LEF1,LILRB1,MALT1,MEF2C,MS4A1,NCSTN,NPR3,P2RX7,PIK3CG,PLCL2,PPP3CB,PRKCD,PSMB10,PTPRC,RC3H1,RC3H2,RIPK2,RPS6,SATB1,SLAMF1,SLAMF6,SLC11A1,TBK1,TLR4,TNFRSF4,TNFSF11,TNFSF14,TNFSF18,TNFSF4,WNT4	Human
NCB-CB	_tstat	within each collection	BP: GO biological process	GO_REGULATION_OF_NATURAL_KILLER_CELL_ACTIVATION	0.000444	0.00530695	-0.627951	-2.05622	0	21	FLT3LG,RASGRP1,IL15,HAVCR2,PTPN22,IL18,AXL,RHBDD3,LAMP1,CD244,IL23A,STAT5B,AP1G1	13	0.619048	AP1G1,AXL,BLOC1S3,CD244,FLT3LG,GAS6,HAVCR2,IL12A,IL15,IL18,IL23A,LAMP1,MICA,PGLYRP2,PIBF1,PTPN22,RASGRP1,RHBDD3,STAT5B,TICAM1,ZBTB1	Human
NCB-CB	_tstat	within each collection	BP: GO biological process	GO_REGULATION_OF_ANTIGEN_PROCESSING_AND_PRESENTATION	0.000448	0.00530695	-0.620459	-2.0547	0	22	HLA-DOA,HLA-DOB,HFE,TAP2,CD74,TAP1,WAS,NOD2,LILRB2,CCR7,CCL21,ABCB1,TAPBPL,PYCARD	14	0.636364	ABCB1,ABCB4,ABCB5,ABCB9,CCL19,CCL21,CCR7,CD74,HFE,HLA-DOA,HLA-DOB,LILRB2,NOD1,NOD2,PYCARD,SLC11A1,TAP1,TAP2,TAPBPL,THBS1,TREM2,WAS	Human
NCB-CB	_tstat	within each collection	BP: GO biological process	GO_REGULATION_OF_TISSUE_REMODELING	0.000468	0.00530695	-0.506329	-2.05144	0	49	TMEM64,IL20RA,IL15,CSF1R,CSK,SIGLEC15,INPP5D,TNFRSF11B,IL18,P2RX7,SYT7,THBS4,BCR,ADAM8,CD38,S1PR1,PDK4,FLT4,PML,IL23A,ITGB3,PPARGC1B,TNFAIP3,PTGER4,TNFSF11	25	0.510204	ABR,ADAM8,AGT,ATP6AP1,B4GALT1,BAX,BCR,BGLAP,CA2,CD38,CSF1R,CSK,CST3,ERG,FLT4,GJA1,GREM1,HRG,IL15,IL18,IL20RA,IL23A,INPP5D,ITGB3,LEPR,LRP5,MC4R,NF1,P2RX7,PDK4,PML,PPARGC1B,PTGER4,S1PR1,SFRP1,SIGLEC15,SPP1,SRC,SYK,SYT7,TFRC,THBS4,TMBIM1,TMEM64,TNFAIP3,TNFRSF11B,TNFSF11,UBASH3B,VDR	Human
NCB-CB	_tstat	within each collection	BP: GO biological process	GO_NEGATIVE_REGULATION_OF_IMMUNE_EFFECTOR_PROCESS	0.000499	0.00530695	-0.446294	-2.04876	0	91	HFE,HLA-E,MICB,IL4R,LILRB1,NLRX1,BST2,TAP1,HLA-A,IL10,HLA-B,DHX58,HAVCR2,CD84,IL33,PPM1B,SERPINB9,EIF2AK2,DUSP10,CD300A,ITCH,SLAMF1,IFIT1,PTPRC,CR1,IL2RA,SPN,TRIM38,CCR2,HLX,BCR,FOXP3,HMOX1,ARRB2,JAK3,PTPN6,LGALS9,TMBIM6,ANGPT1	39	0.428571	A2M,ABR,ANGPT1,ANXA1,APOA1,APOA2,ARRB2,BCL6,BCR,BST2,C1QBP,C4BPA,C4BPB,CCR2,CD300A,CD46,CD55,CD59,CD84,CEACAM1,CLEC4G,CR1,CUEDC2,DHX58,DUSP10,DUSP22,EIF2AK2,FER,FOXF1,FOXJ1,FOXP3,HAVCR2,HFE,HLA-A,HLA-B,HLA-E,HLX,HMOX1,HTRA1,IFIT1,IGF2,IL10,IL13RA2,IL20RB,IL2RA,IL33,IL4R,IL7R,IRAK3,ITCH,JAK3,LGALS3,LGALS9,LILRB1,MASP1,MICA,MICB,MUL1,NDFIP1,NLRX1,PCBP2,PGLYRP2,PPM1B,PPP3CB,PRKDC,PTPN6,PTPRC,RABGEF1…	Human
NCB-CB	_tstat	within each collection	BP: GO biological process	GO_NEGATIVE_REGULATION_OF_TYPE_I_INTERFERON_PRODUCTION	0.000449	0.00530695	-0.532631	-2.03989	0	38	UBA7,TRIM25,UBE2L6,HERC5,CYLD,LILRB1,NLRX1,IL10,DHX58,HAVCR2,NLRC5,PPM1B,NMI,ITCH,IFIH1,OTUD5	16	0.421053	CYLD,DDX58,DHX58,HAVCR2,HERC5,IFIH1,IKBKE,IL10,IRF3,ISG15,ITCH,LILRB1,MAVS,NLRC5,NLRX1,NMI,OTUD5,PCBP2,PIN1,PPM1B,PYCARD,REL,RELB,RNF135,RNF216,RPS27A,TAX1BP1,TBK1,TNFAIP3,TRAF3,TRAF3IP1,TRAIP,TRIM25,UBA52,UBA7,UBB,UBC,UBE2L6	Human
NCB-CB	_tstat	within each collection	BP: GO biological process	GO_REGULATION_OF_MAST_CELL_ACTIVATION	0.000446	0.00530695	-0.539087	-2.03904	0	36	FES,IL4R,VAMP8,MILR1,VAMP7,FCER1G,ZAP70,CD84,FGR,RAC2,CD300A,CNR2,SNX6,UNC13D,LYN,PLSCR1,HMOX1,LGALS9,GAB2,CD226,PDPK1,PTPRE	22	0.611111	ADORA2B,C12orf4,CD226,CD300A,CD84,CNR1,CNR2,FCER1A,FCER1G,FER,FES,FGR,FOXF1,GAB2,HMOX1,IL13RA2,IL4R,LGALS9,LYN,MILR1,NR4A3,PDPK1,PLSCR1,PTPRE,RABGEF1,RAC2,SNX4,SNX6,STXBP2,SYK,UNC13D,VAMP2,VAMP3,VAMP7,VAMP8,ZAP70	Human
NCB-CB	_tstat	within each collection	BP: GO biological process	GO_DICARBOXYLIC_ACID_METABOLIC_PROCESS	0.000499	0.00530695	-0.441033	-2.03803	0	94	SDHA,ME1,DDO,MTRR,ALDH5A1,SUCLG1,ACOT4,MRPS36,QPRT,DLD,GCLM,STAT5A,HOGA1,NMNAT1,SLC25A32,GGT1,NMNAT2,GLUD2,ME3,MDH1,OAT,DHFR,GLUD1,SDHB,KYNU,SLC19A1,CYP17A1,GOT2,MTHFS,IDH1,IDH3G,KMO,FH,STAT5B,GCLC,MDH2,ME2,AMDHD1,D2HGDH,GOT1,ADHFE1,SHMT2,GLS2,ALDH1L1,GHR	45	0.478723	AADAT,ACLY,ACMSD,ACOT4,ACOT8,ACSF3,ADHFE1,ADSS,ADSSL1,ALDH18A1,ALDH1L1,ALDH1L2,ALDH4A1,ALDH5A1,AMDHD1,ASPA,ASS1,ATIC,CYP17A1,D2HGDH,DDO,DHFR,DLD,DLST,FH,FOLR1,FPGS,FTCD,GAD1,GCLC,GCLM,GGT1,GHR,GLS,GLS2,GLUD1,GLUD2,GLUL,GOT1,GOT2,GPT2,GRHPR,HAAO,HAL,HOGA1,IDH1,IDH2,IDH3B,IDH3G,KEAP1,KMO,KYNU,L2HGDH,MDH1,MDH1B,MDH2,ME1,ME2,ME3,MRPS36,MTHFD1,MTHFD1L,MTHFD2,MTHFD2L,MTHFR,MTHFS,MTRR,NAGS,NIT2,NMNAT1,N…	Human
NCB-CB	_tstat	within each collection	BP: GO biological process	GO_LEUKOCYTE_CHEMOTAXIS	0.000504	0.00530695	-0.435509	-2.03716	0	101	PTPRO,VAV1,CCR1,CCL4L2,CCL24,CCL3,IL10,SBDS,FOLR2,C5AR1,NCKAP1L,IL17RA,FCER1G,ITGB2,TNFRSF11A,ANO6,CXCL11,IL17RC,IL1B,EDNRB,CCR7,SFTPD,CKLF,CCR5,PIK3CG,CCL8,CORO1A,CSF3R,XCL2,IL16,CCR2,CCL4,IL6R,LYST,CCL21,CCL7,ADAM8,CCL5,CCL23,CXCL13,S100A9,CX3CL1,CXCR3,CCL13,CCL18,TNFSF11,CCL19,TREM1,CXCL10,IFNG,CCR6,HRH1,CX3CR1,PDE4B,PIK3CD	55	0.544554	ADAM8,ANO6,ANXA1,ARHGEF5,C5AR1,CCL11,CCL13,CCL14,CCL15,CCL16,CCL18,CCL19,CCL2,CCL20,CCL21,CCL22,CCL23,CCL24,CCL3,CCL4,CCL4L2,CCL5,CCL7,CCL8,CCR1,CCR2,CCR5,CCR6,CCR7,CHGA,CKLF,CORO1A,CSF3R,CX3CL1,CX3CR1,CXADR,CXCL10,CXCL11,CXCL13,CXCL16,CXCL3,CXCR1,CXCR2,CXCR3,CXCR4,EDN1,EDN2,EDN3,EDNRB,FCER1G,FLT1,FOLR2,GAS6,GBF1,HMGB1,HRH1,IFNG,IL10,IL16,IL17RA,IL17RC,IL1B,IL6,IL6R,ITGA1,ITGA9,ITGB2,KIT,LBP,LGAL…	Human
NCB-CB	_tstat	within each collection	BP: GO biological process	GO_REGULATION_OF_INTERLEUKIN_17_PRODUCTION	0.000875	0.00642343	-0.665973	-2.03233	1	16	PRKCQ,MYD88,IL15,NCKAP1L,TLR4,NOD2,SLAMF6,IL18,LY9,FOXP3	10	0.625	FOXP3,IFNG,IL12A,IL15,IL18,IL23A,LY9,MYD88,NCKAP1L,NOD2,PRKCQ,PRNP,SLAMF6,TLR4,TNFSF4,TUSC2	Human
NCB-CB	_tstat	within each collection	BP: GO biological process	GO_REGULATION_OF_LEUKOCYTE_DIFFERENTIATION	0.000584	0.00532009	-0.389446	-2.03152	0	200	HLA-DOA,ATP11C,TRIB1,TMEM64,CASP8,IL1RL2,IRF1,FLT3LG,CCR1,IL4R,CYLD,LILRB1,CD74,CD28,BTK,RASGRP1,CCL3,IL15,ESRRA,GPR55,CSF1,CARD11,HLA-B,NCKAP1L,CD86,NKAP,ZAP70,CSF1R,ADA,TLR4,SASH3,NFAM1,SIGLEC15,CD80,IL12RB1,RIPK2,SLC9B2,SOX13,C1QC,RAG1,LILRB2,IL1B,LILRB4,PPP2R3C,INPP5D,XBP1,RIPK1,CD27,TYROBP,TFE3,BAD,OGT,IL7,AXL,IL2RA,HLX,HLA-G,NLRP3,LYN,SOD1,AP3D1,PIK3R6,AGER,IRF4,FOXP3,ADAM8,CCL5,IKZF3,CTLA4…	93	0.465	ACIN1,ADA,ADAM8,ADIPOQ,AGER,ANXA1,AP3B1,AP3D1,APCS,ATP11C,ATP6AP1,AXL,BAD,BCL6,BGLAP,BMP4,BTK,C1QC,CA2,CAMK4,CARD11,CASP8,CCL19,CCL3,CCL5,CCR1,CD101,CD2,CD27,CD28,CD46,CD74,CD80,CD83,CD86,CDKN2A,CEBPB,CLPTM1,CREB1,CSF1,CSF1R,CTLA4,CTNNB1,CTNNBIP1,CUL4A,CYLD,CYP26B1,DTX1,EGR3,ERBB2,ESRRA,FADD,FAS,FBXO7,FLT3LG,FOS,FOXJ1,FOXN1,FOXP1,FOXP3,FSTL3,GAS6,GATA2,GATA3,GLI2,GLI3,GNAS,GPR55,GPR68,HAX1,HCLS1,…	Human
NCB-CB	_tstat	within each collection	BP: GO biological process	GO_POSITIVE_REGULATION_OF_HEMOPOIESIS	0.000546	0.00530695	-0.41101	-2.02772	0	142	ATP11C,TRIB1,TMEM64,FES,CASP8,IL1RL2,FLT3LG,CCR1,IL4R,CD74,BTK,RASGRP1,IL15,CSF1,NCKAP1L,CD86,NKAP,ZAP70,MAPK14,CSF1R,ADA,SASH3,ETS1,CD80,IL12RB1,RIPK2,SLC9B2,RAG1,LILRB2,IL1B,PPP2R3C,INPP5D,XBP1,RIPK1,CD27,SMAP1,BAD,OGT,IL7,AXL,IL2RA,HLX,MAPK11,HLA-G,NLRP3,AP3D1,PIK3R6,AGER,FOXP3,ADAM8,CCL5,THPO,LGALS9,IL23A,ISG15,STAT5B,PPARGC1B,ZNF16,TNF,TAL1,TNFSF11,IL7R,CCL19,TGFBR2,IFNG	65	0.457746	ACIN1,ACVR1B,ACVR2A,ADA,ADAM8,AGER,ANKRD54,ANXA1,AP3B1,AP3D1,ARNT,ATP11C,ATP6AP1,ATXN1L,AXL,BAD,BTK,CA2,CASP8,CCL19,CCL5,CCR1,CD101,CD27,CD46,CD74,CD80,CD83,CD86,CREB1,CSF1,CSF1R,CTNNBIP1,EGR3,ETS1,FADD,FES,FLT3LG,FOS,FOXC1,FOXO3,FOXP3,GAS6,GATA2,GATA3,GLI2,GLI3,GNAS,GPR68,HAX1,HCLS1,HIF1A,HLA-G,HLX,HMGB1,HMGB2,HOXA5,ID2,IFNG,IHH,IL12A,IL12RB1,IL15,IL1B,IL1RL2,IL23A,IL2RA,IL34,IL4R,IL6,IL7,IL7R,I…	Human
NCB-CB	_tstat	within each collection	BP: GO biological process	GO_RESPONSE_TO_INTERFERON_BETA	0.00088	0.00642343	-0.624532	-2.02586	1	20	IRF1,AIM2,HTRA2,BST2,XAF1,IFITM1,PLSCR1,TLR3,UBE2K,PNPT1,IFITM2,DDX41,STAT1,TRIM6	14	0.7	AIM2,BST2,CDC34,DDX41,HTRA2,IFITM1,IFITM2,IFITM3,IKBKE,IRF1,NDUFA13,PLSCR1,PNPT1,STAT1,TLR3,TMEM173,TRIM6,UBE2G2,UBE2K,XAF1	Human
NCB-CB	_tstat	within each collection	BP: GO biological process	GO_PEPTIDYL_TYROSINE_AUTOPHOSPHORYLATION	0.000449	0.00530695	-0.527858	-2.02161	0	38	FES,BLK,BTK,MATK,ZAP70,PTK6,CSK,ITK,JAK1,FGR,LCK,JAK2,TXK,MAPK3,HCK,LYN,JAK3,BMX,PTK2B,TEC	20	0.526316	ABL1,ABL2,BLK,BMX,BTK,CSK,DDR1,FER,FES,FGR,FRK,FYN,HCK,IGF1R,INSR,ITK,JAK1,JAK2,JAK3,KDR,LCK,LYN,MAPK3,MATK,PTK2,PTK2B,PTK6,ROS1,SRC,STYK1,SYK,TEC,TNK1,TNK2,TXK,TYK2,YES1,ZAP70	Human
NCB-CB	_tstat	within each collection	BP: GO biological process	GO_NEGATIVE_REGULATION_OF_DEFENSE_RESPONSE_TO_VIRUS	0.00130833	0.00894532	-0.651083	-2.02111	2	17	MICB,NLRX1,DHX58,PPM1B,EIF2AK2,ITCH,IFIT1,IL2RA,TRIM38	9	0.529412	C1QBP,DHX58,EIF2AK2,HTRA1,IFIT1,IL2RA,ITCH,MICB,MUL1,NLRX1,PCBP2,PPM1B,SEC14L1,TARBP2,TRAF3IP1,TRIM38,TSPAN6	Human
NCB-CB	_tstat	within each collection	BP: GO biological process	GO_REGULATION_OF_INTERFERON_ALPHA_PRODUCTION	0.000441	0.00530695	-0.631348	-2.02087	0	19	ZC3HAV1,IL10,HAVCR2,IRF5,NMI,TLR4,RIPK2,TLR8,IFIH1,TLR7,TLR3,IRF7	12	0.631579	DDX58,HAVCR2,HMGB1,HSPD1,IFIH1,IL10,IRF3,IRF5,IRF7,MAVS,NMI,RIPK2,TBK1,TLR3,TLR4,TLR7,TLR8,TLR9,ZC3HAV1	Human
NCB-CB	_tstat	within each collection	BP: GO biological process	GO_REGULATION_OF_CYTOKINE_BIOSYNTHETIC_PROCESS	0.00049	0.00530695	-0.447544	-2.01626	0	82	NFKB1,PRKCQ,IRF1,TLR1,LILRB1,CD28,SIGIRR,IL10,CARD11,CD86,TLR6,LTB,TIRAP,CD4,NMI,TLR4,CD80,IL1B,TLR8,INPP5D,BCL3,SFTPD,UBE2J1,MAP2K5,EBI3,CD3E,SPN,PTAFR,CCR2,LAG3,TNFRSF8,TLR7,IRF4,FOXP3	34	0.414634	APOA2,ASB1,BCL10,BCL3,CARD11,CARD9,CCL20,CCR2,CD276,CD28,CD3E,CD4,CD80,CD86,CEBPB,CEBPG,EBI3,EREG,ERRFI1,FCER1A,FOXJ1,FOXP3,GATA3,GLMN,HMOX1,HSPB1,IFNG,IGF2BP1,IGF2BP2,IGF2BP3,IL10,IL1B,IL27,IL6,INHA,INHBA,INHBB,INPP5D,IRF1,IRF4,KLF4,LAG3,LBP,LILRB1,LTB,MAP2K3,MAP2K5,MAPKAPK2,MAST2,NFKB1,NLRP12,NMI,PRKCQ,PTAFR,RELA,RNF128,SFTPD,SIGIRR,SPN,STAT5B,SYK,TBK1,THBS1,TIA1,TICAM1,TIRAP,TLR1,TLR3,TLR4,TLR…	Human
NCB-CB	_tstat	within each collection	BP: GO biological process	GO_CYTOKINE_PRODUCTION	0.00051	0.00530695	-0.425624	-2.00571	0	105	AIM2,LILRB1,CD28,BTN3A2,RAB1A,RASGRP1,NFATC2,TLR6,BATF,CD4,BTN3A1,ITK,CASP1,TLR4,NOD2,IFNAR1,ABCA1,GBP5,TLR2,SLAMF1,TXK,IL1B,CCR7,IL18,NOS2,EOMES,PIK3CG,S100A13,RFTN1,PTAFR,LCP2,CD36,TRIM56,NLRP3,LYN,IRAK4,FOXP3,NLRC4,IL31RA,NFATC2IP,HEG1,S100A9,PLA2R1,IRF7,CXCR3,CCL19,TREM1,LIPA,MAF	49	0.466667	ABCA1,ADAMTS3,AGT,AIM2,ASH1L,AVPR2,AZI2,BATF,BCL10,BTN3A1,BTN3A2,CAMK4,CASP1,CCL19,CCR7,CD226,CD28,CD36,CD4,CD46,CD55,CHGA,CHI3L1,CXCR3,DBH,DENND1B,DLG1,EOMES,F2RL1,FABP4,FOXP1,FOXP3,GAS6,GATA3,GBP5,GPAM,HEG1,HIF1A,HMGB1,HSPD1,IDO1,IFNAR1,IL12RB2,IL18,IL1B,IL31RA,IRAK4,IRF3,IRF7,ITK,KIT,LCP2,LILRB1,LIPA,LTBP3,LYN,MAF,MR1,NFAT5,NFATC2,NFATC2IP,NLRC4,NLRP3,NOD1,NOD2,NOS2,NOTCH1,NOX5,NR1H4,PAWR,PCSK…	Human
NCB-CB	_tstat	within each collection	BP: GO biological process	GO_POSITIVE_REGULATION_OF_ALPHA_BETA_T_CELL_DIFFERENTIATION	0.000449	0.00530695	-0.53514	-2.00485	0	35	IL4R,NCKAP1L,CD86,NKAP,ZAP70,ADA,SASH3,CD80,IL12RB1,RIPK2,HLX,NLRP3,AP3D1,FOXP3,LGALS9,IL23A,CCL19,TGFBR2,IFNG	19	0.542857	ADA,ANXA1,AP3B1,AP3D1,CCL19,CD80,CD83,CD86,FOXP3,GLI3,HLX,IFNG,IHH,IL12RB1,IL23A,IL4R,IL6,ITPKB,LGALS9,MYB,NCKAP1L,NKAP,NLRP3,PNP,PRKCZ,RARA,RIPK2,SASH3,SHH,SOCS5,SYK,TGFBR2,TNFSF4,ZAP70,ZBTB16	Human
NCB-CB	_tstat	within each collection	BP: GO biological process	GO_NEGATIVE_REGULATION_OF_INTERLEUKIN_6_PRODUCTION	0.000449	0.00530695	-0.562188	-2.00481	0	29	ARRB1,BANK1,NLRX1,IL10,NCKAP1L,HAVCR2,CSK,PTPN22,TLR4,SLAMF1,INPP5D,NLRC3,FOXP3,ARRB2,ZC3H12A,TNFAIP3,TNF,C1QTNF3	18	0.62069	ARRB1,ARRB2,BANK1,C1QTNF3,CSK,FOXJ1,FOXP3,GAS6,GBA,HAVCR2,HGF,IL10,INPP5D,IRAK3,KLF2,NCKAP1L,NLRC3,NLRP12,NLRX1,ORM1,PTPN22,RABGEF1,SLAMF1,SOCS5,TLR4,TLR9,TNF,TNFAIP3,ZC3H12A	Human
NCB-CB	_tstat	within each collection	BP: GO biological process	GO_OXIDATIVE_PHOSPHORYLATION	0.000485	0.00530695	-0.452021	-2.00466	0	76	NDUFAF1,COX5A,TAZ,UQCR11,NDUFS7,NDUFA1,NDUFV3,UQCRB,DLD,CYC1,COX6C,COX7A2L,UQCR10,COX6B1,NDUFAB1,UQCRFS1,CHCHD10,UQCRC2,NDUFB11,UQCRQ,NDUFA6,NDUFA10,NDUFS6,NDUFB10,FXN,NDUFS4,NDUFS1,COX4I1,NDUFB3,NDUFA2,UQCRC1,NDUFV1,NDUFC1,MECP2,NDUFB6,NDUFV2	36	0.473684	AK2,CHCHD10,COQ9,COX10,COX15,COX4I1,COX5A,COX5B,COX6A1,COX6B1,COX6C,COX7A2L,COX7B,COX7C,COX8A,CYC1,CYCS,DLD,FXN,MECP2,MSH2,NDUFA1,NDUFA10,NDUFA11,NDUFA12,NDUFA13,NDUFA2,NDUFA3,NDUFA4,NDUFA5,NDUFA6,NDUFA7,NDUFA8,NDUFA9,NDUFAB1,NDUFAF1,NDUFB1,NDUFB10,NDUFB11,NDUFB2,NDUFB3,NDUFB4,NDUFB5,NDUFB6,NDUFB7,NDUFB8,NDUFB9,NDUFC1,NDUFC2,NDUFC2-KCTD14,NDUFS1,NDUFS2,NDUFS3,NDUFS4,NDUFS5,NDUFS6,NDUFS7,NDUFS8,ND…	Human
NCB-CB	_tstat	within each collection	BP: GO biological process	GO_THYMIC_T_CELL_SELECTION	0.000438	0.00530695	-0.63505	-2.00317	0	18	STK11,CD74,CD28,CARD11,ZAP70,CD3D,DOCK2,CCR7,CD3E,SPN	10	0.555556	ATG5,CARD11,CCR7,CD28,CD3D,CD3E,CD74,DOCK2,FAS,GATA3,GLI3,ITPKB,JAG2,SHH,SPN,SRF,STK11,ZAP70	Human
NCB-CB	_tstat	within each collection	BP: GO biological process	GO_REGULATION_OF_MYOBLAST_FUSION	0.000864	0.00639072	-0.66805	-2.00189	1	15	FLT3LG,IL4R,CD53,NFATC2,EHD1,MAPK14,MYOG,TNFSF14,CXCL9,CXCL10,CFLAR	11	0.733333	CD53,CFLAR,CXCL10,CXCL9,EHD1,EHD2,FLOT1,FLT3LG,GDF15,IL4R,MAPK14,MYOD1,MYOG,NFATC2,TNFSF14	Human
NCB-CB	_tstat	within each collection	BP: GO biological process	GO_DENDRITIC_CELL_DIFFERENTIATION	0.000895	0.00646283	-0.569696	-1.99752	1	27	BATF2,LILRB1,BATF3,CD86,BATF,FLT3,SPI1,CCR7,LTBR,AXL,LYN,IRF4,UBD,LGALS9,RELB,CCL19,TGFBR2,TNFSF9	18	0.666667	AXL,AZI2,BATF,BATF2,BATF3,CAMK4,CCL19,CCR7,CD86,DHRS2,F2RL1,FLT3,GAS6,IRF4,LGALS9,LILRB1,LTBR,LYN,PSEN1,RBPJ,RELB,SPI1,TGFBR2,TNFSF9,TRAF6,TREM2,UBD	Human
NCB-CB	_tstat	within each collection	BP: GO biological process	GO_REGULATION_OF_MAST_CELL_ACTIVATION_INVOLVED_IN_IMMUNE_RESPONSE	0.000449	0.00530695	-0.55788	-1.98945	0	29	FES,IL4R,VAMP8,VAMP7,FCER1G,ZAP70,CD84,FGR,RAC2,CD300A,SNX6,UNC13D,LYN,HMOX1,LGALS9,GAB2	16	0.551724	ADORA2B,C12orf4,CD300A,CD84,FCER1A,FCER1G,FER,FES,FGR,FOXF1,GAB2,HMOX1,IL13RA2,IL4R,LGALS9,LYN,PDPK1,RABGEF1,RAC2,SNX4,SNX6,STXBP2,SYK,UNC13D,VAMP2,VAMP3,VAMP7,VAMP8,ZAP70	Human
NCB-CB	_tstat	within each collection	BP: GO biological process	GO_DETECTION_OF_BIOTIC_STIMULUS	0.000448	0.00530695	-0.598606	-1.98233	0	22	TLR1,HLA-A,HLA-B,LY96,TLR6,CRTAM,TLR4,NOD2,TLR2,CD1D,NLRP3,NLRC4	12	0.545455	C4B,CD1D,CRTAM,HLA-A,HLA-B,HLA-DRB1,HLA-DRB5,LBP,LY96,NLRC4,NLRP3,NOD1,NOD2,PGLYRP2,SCARB1,SMO,SSC5D,TLR1,TLR2,TLR4,TLR6,TREM2	Human
NCB-CB	_tstat	within each collection	BP: GO biological process	GO_REGULATION_OF_LYMPHOCYTE_DIFFERENTIATION	0.000513	0.00530695	-0.413504	-1.97977	0	115	HLA-DOA,ATP11C,IL1RL2,IRF1,FLT3LG,IL4R,CYLD,CD74,CD28,BTK,RASGRP1,IL15,CARD11,NCKAP1L,CD86,NKAP,ZAP70,ADA,SASH3,NFAM1,CD80,IL12RB1,RIPK2,SOX13,RAG1,LILRB2,IL1B,PPP2R3C,INPP5D,XBP1,CD27,BAD,IL7,AXL,IL2RA,HLX,HLA-G,NLRP3,SOD1,AP3D1,PIK3R6,IRF4,FOXP3,ADAM8,IKZF3,CTLA4,JAK3,PTPN6,LGALS9,IL23A,FAS,CD2,IL27,STAT5B,IL7R,CCL19,TGFBR2,FBXO7,IFNG,BMP4,PRDM1,TNFSF9	62	0.53913	ADA,ADAM8,ANXA1,AP3B1,AP3D1,ATP11C,AXL,BAD,BCL6,BMP4,BTK,CAMK4,CARD11,CCL19,CD2,CD27,CD28,CD46,CD74,CD80,CD83,CD86,CDKN2A,CLPTM1,CTLA4,CYLD,CYP26B1,DTX1,EGR3,ERBB2,FAS,FBXO7,FLT3LG,FOXJ1,FOXN1,FOXP3,GAS6,GATA3,GLI2,GLI3,HLA-DOA,HLA-G,HLX,HMGB1,ID2,IFNG,IHH,IKZF3,IL12A,IL12RB1,IL15,IL1B,IL1RL2,IL23A,IL27,IL2RA,IL4R,IL6,IL7,IL7R,INHA,INHBA,INPP5D,IRF1,IRF4,ITPKB,JAK3,LGALS9,LILRB2,MMP14,MYB,NCKAP1L…	Human
NCB-CB	_tstat	within each collection	BP: GO biological process	GO_CELLULAR_DEFENSE_RESPONSE	0.000461	0.00530695	-0.493715	-1.97843	0	46	TCIRG1,CD300C,IL1RL2,CD19,GNLY,LY96,C5AR1,CD160,TRAT1,ITK,NCF1,ADORA2A,LILRB2,TYROBP,CCR5,SH2D1A,SPN,PRF1,CCR2,HLA-G,CXCL9,RELA,PTK2B,NCF2,CCR6,MNDA,NCR1,CX3CR1	28	0.608696	ADORA2A,ADORA2B,BCL10,BECN1,C5AR1,CCR2,CCR3,CCR5,CCR6,CD160,CD19,CD300C,CD5L,CLEC5A,CX3CR1,CXCL9,CXCR2,DCDC2,FOSL1,GAGE1,GNLY,HLA-G,IL1RL2,ITGB1,ITK,KLRG1,LBP,LGALS3BP,LILRB2,LSP1,LY96,MNDA,NCF1,NCF2,NCR1,PRF1,PTK2B,RAB23,RELA,SH2D1A,SPN,TCIRG1,TRAT1,TYROBP,VEZF1,ZNF148	Human
NCB-CB	_tstat	within each collection	BP: GO biological process	GO_ELECTRON_TRANSPORT_CHAIN	0.000496	0.00530695	-0.432083	-1.97756	0	90	NDUFAF1,SDHA,COX5A,TAZ,UQCR11,NDUFS7,NDUFA1,NDUFV3,ALDH5A1,UQCRB,DLD,ETFA,CYC1,COX6C,COX7A2L,UQCR10,SCO2,COX6B1,NDUFAB1,UQCRFS1,SDHB,UQCRC2,NDUFB11,UQCRQ,NDUFA6,PINK1,NDUFA10,NDUFS6,NDUFB10,NDUFS4,NDUFS1,COX4I1,NDUFB3,NDUFA2,GPD1,UQCRC1,NDUFV1,NDUFC1,IMMP2L,MECP2,NDUFB6,NDUFV2	42	0.466667	ALDH5A1,COQ9,COX10,COX15,COX4I1,COX5A,COX5B,COX6A1,COX6B1,COX6C,COX7A2L,COX7B,COX7C,COX8A,CYB561,CYC1,CYCS,DLD,ETFA,ETFB,ETFDH,GPD1,IMMP2L,MECP2,MYBBP1A,NDUFA1,NDUFA10,NDUFA11,NDUFA12,NDUFA13,NDUFA2,NDUFA3,NDUFA4,NDUFA5,NDUFA6,NDUFA7,NDUFA8,NDUFA9,NDUFAB1,NDUFAF1,NDUFAF2,NDUFB1,NDUFB10,NDUFB11,NDUFB2,NDUFB3,NDUFB4,NDUFB5,NDUFB6,NDUFB7,NDUFB8,NDUFB9,NDUFC1,NDUFC2,NDUFC2-KCTD14,NDUFS1,NDUFS2,NDUFS3…	Human
NCB-CB	_tstat	within each collection	BP: GO biological process	GO_REGULATION_OF_CELL_CELL_ADHESION	0.00066	0.00540062	-0.35626	-1.97539	0	339	TNFRSF14,HLA-DOA,HFE,VAV1,PRKCQ,CASP3,HLA-E,IL1RL2,IRF1,CCDC88B,CD274,PRR5,IL4R,TNFAIP8L2,CYLD,LILRB1,CD74,CD28,RDX,RASGRP1,TRAC,PDCD1LG2,IL15,HLA-A,IL10,CARD11,HLA-DPA1,HLA-DRA,LAT,NCKAP1L,CD86,AIF1,NKAP,HAVCR2,SIT1,SIRPG,CD209,CD4,ZAP70,MAP3K14,CSK,CD3D,ADA,CD247,PTPN22,LCK,SASH3,NOD2,ITGA4,RAC2,ETS1,CD80,IL12RB1,CD300A,RIPK2,HLA-DMB,SOX13,JAK2,HLA-DPB1,GCNT2,KLRK1,ITCH,RIPK3,RAG1,LILRB2,SLAMF1…	139	0.410029	ABAT,ABL1,ADA,ADAM8,ADAMTS18,ADIPOQ,ADK,ADRB2,AGER,AIF1,AKT1,ANK3,ANXA1,AP3B1,AP3D1,APOA1,ASS1,B4GALNT2,BAD,BCL10,BCL6,BMP2,BMP4,BMP7,BTLA,BTN2A2,C1QTNF1,CAMK4,CARD11,CASP3,CAV1,CCDC88B,CCL19,CCL2,CCL21,CCL28,CCL5,CCR2,CCR7,CD1D,CD2,CD209,CD24,CD244,CD247,CD274,CD276,CD28,CD300A,CD3D,CD3E,CD3G,CD4,CD40LG,CD44,CD46,CD47,CD5,CD55,CD59,CD6,CD74,CD80,CD83,CD86,CDC42,CDH1,CDKN2A,CEACAM1,CEBPB,CELSR2,C…	Human
NCB-CB	_tstat	within each collection	BP: GO biological process	GO_RESPONSE_TO_TUMOR_NECROSIS_FACTOR	0.000584	0.00532009	-0.375613	-1.97422	0	212	MAPK9,CD40,NFKB1,PSMB8,TNFRSF14,PSMB9,ZFAND6,PSME1,TNFSF13B,PSMB10,CASP3,CASP8,AIM2,CCL4L2,BIRC3,CCL24,PSMA4,CCL3,TRADD,CD58,TNFRSF13B,TNFSF12,NKX3-1,LTA,LTB,MAP3K14,PSMA5,TNFRSF17,AFF3,TNFRSF11A,TNFRSF1B,JAK2,NUB1,RIPK1,CD27,TNFRSF11B,CD14,ADAM10,HYAL3,LTBR,CD40LG,VCAM1,CIB1,CCL8,XCL2,TNFRSF4,TNFSF15,CCL4,TNFRSF8,CCL21,TNFRSF1A,TNFRSF9,PSME2,GCH1,PYCARD,CCL7,ENDOG,MBP,TNFRSF18,TNFSF14,EDA,CCL5,C…	94	0.443396	ADAM10,ADAM17,ADAM9,ADAMTS12,ADAMTS13,ADAMTS7,ADIPOQ,AFF3,AIM2,APOB,ARHGEF2,ASS1,BAG4,BIRC2,BIRC3,BRCA1,CARD14,CASP3,CASP8,CCL11,CCL13,CCL14,CCL15,CCL16,CCL18,CCL19,CCL2,CCL20,CCL21,CCL22,CCL23,CCL24,CCL3,CCL4,CCL4L2,CCL5,CCL7,CCL8,CD14,CD27,CD40,CD40LG,CD58,CD70,CHI3L1,CHUK,CIB1,COL1A1,COMMD7,CRHBP,CX3CL1,CXCL16,CYBA,DAB2IP,DAXX,EDA,EDA2R,EDAR,EDARADD,EDN1,ENDOG,ENTPD2,EP300,FAS,FOXO3,GATA3,GBA,…	Human
NCB-CB	_tstat	within each collection	BP: GO biological process	GO_ANTIGEN_PROCESSING_AND_PRESENTATION_OF_ENDOGENOUS_ANTIGEN	0.00130833	0.00894532	-0.635111	-1.97153	2	17	B2M,TAP2,HLA-E,TAPBP,CD74,TAP1,HLA-A,HLA-C,HLA-B,ERAP1,CD1D,ABCB1,ERAP2	13	0.764706	ABCB1,ABCB4,ABCB5,ABCB9,ATG5,B2M,CD1D,CD74,ERAP1,ERAP2,HLA-A,HLA-B,HLA-C,HLA-E,TAP1,TAP2,TAPBP	Human
NCB-CB	_tstat	within each collection	BP: GO biological process	GO_NEGATIVE_REGULATION_OF_RESPONSE_TO_BIOTIC_STIMULUS	0.000887	0.00645726	-0.563638	-1.96465	1	26	TRIB1,MICB,NLRX1,SIGIRR,DHX58,HAVCR2,PPM1B,EIF2AK2,ITCH,IFIT1,IL2RA,NFKBIL1,TRIM38,SIRT2	14	0.538462	C1QBP,DHX58,EIF2AK2,HAVCR2,HTRA1,IFIT1,IL2RA,ITCH,LTF,MICB,MUL1,NFKBIL1,NLRX1,PCBP2,PPM1B,PRDM1,SEC14L1,SIGIRR,SIRT2,SPINK5,TARBP2,TNFAIP3,TRAF3IP1,TRIB1,TRIM38,TSPAN6	Human
NCB-CB	_tstat	within each collection	BP: GO biological process	GO_REGULATION_OF_CALCIUM_MEDIATED_SIGNALING	0.000484	0.00530695	-0.448714	-1.96151	0	71	CAMK2D,P2RX5,CCL3,PLEK,HINT1,P2RX4,TRAT1,CD4,ZAP70,GSTO1,CMKLR1,ADA,GBP1,LRRK2,CLIC2,JPH3,MYO5A,CALM3,P2RX3,CIB1,CD3E,CCL4,GSTM2,JSRP1,TRDN,RCAN2,CD8A,NOS1,PRKACA,PTK2B,NRG1	31	0.43662	ADA,AKAP6,ASPH,ATP2B4,CALM1,CALM2,CALM3,CAMK2D,CASQ2,CCL3,CCL4,CD3E,CD4,CD8A,CDH13,CHP2,CIB1,CLIC2,CMKLR1,DMD,DRD4,ERBB3,FCER1A,FKBP1A,FKBP1B,GBP1,GPR143,GSTM2,GSTO1,HAP1,HINT1,HRC,HTT,IGF1,ITPR1,JPH1,JPH2,JPH3,JPH4,JSRP1,LMCD1,LRRK2,MYO5A,NFAT5,NOS1,NRG1,P2RX3,P2RX4,P2RX5,PDE4D,PKD2,PLEK,PLN,PRKACA,PRNP,PTK2B,RCAN1,RCAN2,RCAN3,RGN,SLA2,SLC9A1,SPPL3,SRI,SYK,TMBIM4,TMEM100,TRAT1,TRDN,TREM2,ZAP70	Human
NCB-CB	_tstat	within each collection	BP: GO biological process	GO_NEGATIVE_REGULATION_OF_IMMUNE_SYSTEM_PROCESS	0.000636	0.00533609	-0.354642	-1.9552	0	318	TNFRSF14,HLA-DOA,GABPA,TRIB1,HLA-DOB,NR1H3,HFE,CASP3,HLA-E,MICB,IRF1,CD274,IL4R,FCRLB,TNFAIP8L2,BANK1,CYLD,LILRB1,CD74,TICAM2,NLRX1,PDCD1LG2,CCL3,BST2,TAP1,STAP1,PIK3AP1,HLA-A,GPR55,TNFRSF13B,IL10,IL27RA,HLA-B,MILR1,LY96,DHX58,CD86,UBASH3A,HAVCR2,FCER1G,SAMSN1,WDR61,LPXN,CD84,NLRC5,IL33,ADA,PPM1B,MIXL1,SERPINB9,EIF2AK2,PTPN22,TBC1D10C,GBP1,NMI,TLR4,DUSP10,NR1D1,FCRL5,CD300A,CNR2,NLRP6,C1QC,KLRK1,…	129	0.40566	A2M,ABR,ADA,ADAR,ADIPOQ,ADORA1,AMBP,ANGPT1,ANXA1,APCS,APOA1,APOA2,APOD,ARRB2,ATM,AXL,BANK1,BCL10,BCL6,BCR,BMP4,BMP5,BST2,BTN2A2,C1QBP,C1QC,C4BPA,C4BPB,C5,CASP3,CCL2,CCL21,CCL28,CCL3,CCR2,CD14,CD274,CD276,CD300A,CD46,CD55,CD59,CD74,CD84,CD86,CDC73,CDK6,CDKN2A,CEACAM1,CEBPB,CIB1,CLEC4G,CNR1,CNR2,COL3A1,CR1,CTLA4,CTNNB1,CTR9,CUEDC2,CUL4A,CXCL12,CYLD,DAB2IP,DHX58,DLG1,DLL1,DNAJA3,DRD2,DTX1,DUSP10,DUS…	Human
NCB-CB	_tstat	within each collection	BP: GO biological process	GO_POSITIVE_REGULATION_OF_CYTOKINE_SECRETION	0.00049	0.00530695	-0.433892	-1.95475	0	82	TNFRSF14,GSDMD,CD274,AIM2,IL4R,RASGRP1,CCL3,CD58,IL10,HAVCR2,IL17RA,MAPK14,CSF1R,CRTAM,IL33,FGR,CASP1,PTPN22,NOD2,HTR2B,IFNAR1,FCN1,IL17RC,SLAMF1,IL1B,XBP1,CD14,P2RX7,CCR2,MAPK11,NLRP3,PYCARD,CD244,LGALS9,CD2,TNF,PTGER4,DRD2,CCL19,IFNG,CLEC4E,C1QTNF3	42	0.512195	ABL1,AGTR2,AIM2,ALOX15B,C1QTNF3,C5,CADM1,CARD8,CASP1,CCL19,CCL3,CCR2,CD14,CD2,CD244,CD274,CD276,CD34,CD58,CLEC4E,CLEC5A,CLEC6A,CRTAM,CSF1R,DRD2,F2R,F2RL1,FCN1,FGR,GATA3,GLMN,GSDMD,HAVCR2,HMGB1,HTR2B,HYAL2,IFNAR1,IFNG,IL10,IL17RA,IL17RB,IL17RC,IL1B,IL1RL1,IL33,IL4R,IRF3,LGALS9,LPL,MAPK11,MAPK14,MIF,NCL,NLRP1,NLRP12,NLRP2,NLRP3,NOD2,P2RX7,PAEP,PANX1,POSTN,PRKCZ,PTGER4,PTPN22,PYCARD,RASGRP1,SAA1,SCA…	Human
NCB-CB	_tstat	within each collection	BP: GO biological process	GO_PTERIDINE_CONTAINING_COMPOUND_BIOSYNTHETIC_PROCESS	0.00129534	0.0088941	-0.652024	-1.95387	2	15	SPR,PCBD1,PCBD2,DHFR,GCH1,QDPR,MTHFS	7	0.466667	ATIC,DHFR,FPGS,GART,GCH1,MTHFD1,MTHFD1L,MTHFD2,MTHFD2L,MTHFS,PCBD1,PCBD2,PTS,QDPR,SPR	Human
NCB-CB	_tstat	within each collection	BP: GO biological process	GO_CELL_ACTIVATION_INVOLVED_IN_IMMUNE_RESPONSE	0.000506	0.00530695	-0.40855	-1.95363	0	112	SNAP23,NBN,RAB27A,LAT2,LILRB1,VAMP8,RASGRP1,CCL3,MILR1,LAT,APBB1IP,CD180,CD86,VAMP7,HAVCR2,FCER1G,BATF,ZAP70,SH2D1B,PI4K2A,ADA,ITGAL,TLR4,MFNG,DOCK2,SLAMF6,LCP1,SLAMF1,CD1C,BCL3,TYROBP,CD40LG,EOMES,PIK3CG,S100A13,CORO1A,UNC13D,LYN,LY9,IRF4,GPR183,PYCARD,CLEC7A	43	0.383929	ABL1,ADA,ANXA3,APBB1IP,ATP7A,BATF,BCL3,CCL3,CD180,CD1C,CD244,CD40LG,CD86,CHGA,CLEC4E,CLEC7A,CORO1A,CPLX2,CX3CR1,DLL1,DOCK2,EIF2AK4,EOMES,ERCC1,EXO1,EXOSC3,EXOSC6,F2RL1,FCER1G,FOXP1,GAPT,GATA2,GATA3,GBF1,GPR183,HAVCR2,HMGB1,HSPD1,ICAM1,IFNG,IL18R1,IL6,IRF4,ITFG2,ITGAL,KIT,LAT,LAT2,LBP,LCP1,LEF1,LFNG,LGALS1,LIG4,LILRB1,LY9,LYN,MFNG,MILR1,MLH1,MSH2,MSH6,NBN,NOTCH2,NR4A3,PI4K2A,PIK3CD,PIK3CG,PLA2G3,P…	Human
NCB-CB	_tstat	within each collection	BP: GO biological process	GO_ANTIGEN_PROCESSING_AND_PRESENTATION_OF_EXOGENOUS_PEPTIDE_ANTIGEN_VIA_MHC_CLASS_I	0.000481	0.00530695	-0.456958	-1.95049	0	63	B2M,PSMB8,PSMB9,PSME1,PSMB10,HLA-E,HLA-F,CYBB,PSMA4,HLA-A,HLA-C,HLA-B,FCER1G,PSMA5,NCF1,NCF4,FCGR1B,FCGR1A,HLA-G,CD36,PSME2,PSMC2,PSMB2,CYBA,NCF2,PSMD5,PSMC6,PSMD1,PSMA1,PSMB6,PSMD12	31	0.492063	B2M,CD207,CD36,CYBA,CYBB,FCER1G,FCGR1A,FCGR1B,HLA-A,HLA-B,HLA-C,HLA-E,HLA-F,HLA-G,IFI30,ITGAV,ITGB5,LNPEP,NCF1,NCF2,NCF4,PSMA1,PSMA2,PSMA3,PSMA4,PSMA5,PSMA6,PSMA7,PSMB1,PSMB10,PSMB2,PSMB3,PSMB4,PSMB5,PSMB6,PSMB7,PSMB8,PSMB9,PSMC1,PSMC2,PSMC3,PSMC4,PSMC5,PSMC6,PSMD1,PSMD10,PSMD11,PSMD12,PSMD13,PSMD14,PSMD2,PSMD3,PSMD4,PSMD5,PSMD6,PSMD7,PSMD8,PSMD9,PSME1,PSME2,PSME3,PSME4,PSMF1	Human
NCB-CB	_tstat	within each collection	BP: GO biological process	GO_MYD88_INDEPENDENT_TOLL_LIKE_RECEPTOR_SIGNALING_PATHWAY	0.000893	0.00646283	-0.540294	-1.94915	1	30	CASP8,TICAM2,BIRC3,LY96,TLR4,TNIP3,UBE2D3,UBE2D1,RIPK1,CD14,IKBKG,TLR3,TRAF3,IRF7,TANK,FADD,RPS27A	17	0.566667	BIRC2,BIRC3,CASP8,CD14,CHUK,FADD,IKBKB,IKBKE,IKBKG,IRF3,IRF7,LY96,PRKCE,RIPK1,RPS27A,TANK,TBK1,TICAM1,TICAM2,TLR3,TLR4,TNIP3,TRAF3,TRAF6,UBA52,UBB,UBC,UBE2D1,UBE2D2,UBE2D3	Human
NCB-CB	_tstat	within each collection	BP: GO biological process	GO_FC_RECEPTOR_SIGNALING_PATHWAY	0.000584	0.00532009	-0.373537	-1.94853	0	200	MAPK9,NFKB1,PSMB8,PSMB9,PSME1,PSMB10,VAV1,PRKCQ,IGLV7-43,LAT2,IGHV2-70,BTK,PSMA4,CYFIP1,IGKV1D-33,CARD11,ELMO1,NFATC2,IGKV3D-20,LAT,NCKAP1L,IGKV3D-11,FCER1G,WAS,ITK,MYO1G,PSMA5,FGR,FCGR3A,CD247,FBXW11,MYH2,UBE2D1,IGLC1,IGKV1-5,IGHG1,SKP1,FCGR1B,MAPK3,IGHG4,CALM3,HCK,ARPC1A,IGLC3,IGKV4-1,FCGR1A,IGKC,LCP2,TAB2,MAPK1,LYN,PSME2,IGLC2,WIPF3,IKBKG,NFKBIA,WASL,GRAP2,FCGRT,PSMC2,PSMB2,ACTR2,PIK3R1,WIPF1,…	87	0.435	ABI1,ABL1,ACTB,ACTG1,ACTR2,ACTR3,ARPC1A,ARPC1B,ARPC2,ARPC3,ARPC4,ARPC5,BAIAP2,BCL10,BRK1,BTK,BTRC,CALM1,CALM2,CALM3,CARD11,CD247,CD3G,CDC42,CHUK,CLEC4E,CRK,CUL1,CYFIP1,CYFIP2,DOCK1,ELMO1,ELMO2,FBXW11,FCER1A,FCER1G,FCGR1A,FCGR1B,FCGR2A,FCGR3A,FCGRT,FER,FGR,FOS,FYN,GAB2,GRAP2,GRB2,HCK,HRAS,HSP90AA1,HSP90AB1,IGHE,IGHG1,IGHG2,IGHG3,IGHG4,IGHV2-70,IGHV3-23,IGKC,IGKV1-5,IGKV1D-33,IGKV2-40,IGKV3-20,IGKV…	Human
NCB-CB	_tstat	within each collection	BP: GO biological process	GO_MYELOID_CELL_ACTIVATION_INVOLVED_IN_IMMUNE_RESPONSE	0.000451	0.00530695	-0.504465	-1.94645	0	39	SNAP23,LAT2,VAMP8,RASGRP1,CCL3,MILR1,LAT,VAMP7,HAVCR2,FCER1G,ZAP70,PI4K2A,DOCK2,SLAMF1,TYROBP,PIK3CG,S100A13,LYN,PYCARD	19	0.487179	ANXA3,CCL3,CHGA,CPLX2,CX3CR1,DOCK2,FCER1G,GATA2,HAVCR2,HMGB1,KIT,LAT,LAT2,LBP,LYN,MILR1,NR4A3,PI4K2A,PIK3CD,PIK3CG,PLA2G3,PPBP,PRKCE,PYCARD,RASGRP1,S100A13,SBNO2,SLAMF1,SNAP23,STXBP2,STXBP3,SYK,TICAM1,TLR3,TYROBP,VAMP2,VAMP7,VAMP8,ZAP70	Human
NCB-CB	_tstat	within each collection	BP: GO biological process	GO_CELLULAR_RESPIRATION	0.000534	0.00530695	-0.395634	-1.9459	0	135	IDH3A,SDHD,NDUFAF1,SDHA,COX5A,TAZ,FASTKD3,UQCR11,NDUFS7,NDUFA1,NDUFV3,ALDH5A1,SUCLG1,UQCRB,DLD,ETFA,CYC1,COX6C,COX7A2L,ME3,MDH1,MTFR1,UQCR10,SCO2,COX6B1,NDUFAB1,SUCLG2,UQCRFS1,SDHB,UQCRC2,NDUFB11,UQCRQ,NDUFA6,PINK1,NDUFA10,NDUFS6,NDUFB10,FXN,NDUFS4,NDUFS1,COX4I1,NDUFB3,PDHA1,NDUFA2,IDH1,IDH3G,GPD1,FH,UQCRC1,NDUFV1,NDUFC1,BLOC1S1,IMMP2L,MECP2,NDUFB6,NDUFV2,OXA1L,MDH2,ACO2,NNT,ETFDH,NDUFS3,DHTKD1,N…	72	0.533333	ACO1,ACO2,ALDH5A1,BAX,BLOC1S1,CAT,CHCHD5,COQ9,COX10,COX15,COX19,COX4I1,COX5A,COX5B,COX6A1,COX6B1,COX6C,COX7A2L,COX7B,COX7C,COX8A,CS,CYC1,CYCS,CYP1A2,DHTKD1,DLAT,DLD,DLST,ETFA,ETFB,ETFDH,FASTKD1,FASTKD2,FASTKD3,FASTKD5,FH,FXN,GPD1,IDH1,IDH2,IDH3A,IDH3B,IDH3G,IMMP2L,MDH1,MDH1B,MDH2,ME3,MECP2,MTFR1,MYBBP1A,NDUFA1,NDUFA10,NDUFA11,NDUFA12,NDUFA13,NDUFA2,NDUFA3,NDUFA4,NDUFA5,NDUFA6,NDUFA7,NDUFA8,NDUFA9…	Human
NCB-CB	_tstat	within each collection	BP: GO biological process	GO_LEUKOCYTE_DEGRANULATION	0.000898	0.00646283	-0.550478	-1.9458	1	28	SNAP23,RAB27A,LAT2,VAMP8,RASGRP1,CCL3,MILR1,LAT,VAMP7,PI4K2A,HCK,PIK3CG,S100A13,CORO1A,UNC13D,LYN	16	0.571429	ANXA3,CCL3,CHGA,CORO1A,CPLX2,GATA2,HCK,KIT,LAT,LAT2,LYN,MILR1,NR4A3,PI4K2A,PIK3CD,PIK3CG,PLA2G3,PPBP,RAB27A,RASGRP1,S100A13,SNAP23,STXBP2,STXBP3,UNC13D,VAMP2,VAMP7,VAMP8	Human
NCB-CB	_tstat	within each collection	BP: GO biological process	GO_REGULATION_OF_PRODUCTION_OF_MOLECULAR_MEDIATOR_OF_IMMUNE_RESPONSE	0.000486	0.00530695	-0.426631	-1.94312	0	86	CD40,B2M,TNFRSF14,HFE,HLA-E,IL4R,LILRB1,CD74,CD28,BTK,BST2,HLA-A,IL10,IL27RA,TBX21,FCER1G,IL33,TLR4,SASH3,SLAMF1,XBP1,CD40LG,TNFRSF4,CD36,NLRP3,FOXP3,MZB1,HMOX1,STAT6,FZD5,JAK3,CD244,TLR3,STX4,RSAD2,TMBIM6,ANGPT1	37	0.430233	ANGPT1,APLF,APOA1,APOA2,ATG5,B2M,BCL10,BCL6,BST2,BTK,CD244,CD28,CD36,CD40,CD40LG,CD74,CLCF1,CUEDC2,EXOSC3,F2RL1,FCER1G,FOXP3,FZD5,GATA3,GPRC5B,HFE,HLA-A,HLA-E,HMOX1,HPX,IFNG,IL10,IL13RA2,IL27RA,IL33,IL4R,IL6,IRAK3,JAK3,KLK5,KLK7,LILRB1,MALT1,MAP3K7,MIF,MSH6,MZB1,NDFIP1,NLRP3,NR4A3,PAXIP1,PKN1,PRKCZ,PRKDC,RBP4,RSAD2,SASH3,SEMA7A,SLAMF1,SPINK5,SPON2,STAT6,STX4,SUPT6H,TBX21,TGFB2,TGFB3,THOC1,TLR3,TL…	Human
NCB-CB	_tstat	within each collection	BP: GO biological process	GO_T_CELL_DIFFERENTIATION	0.000506	0.00530695	-0.406078	-1.94181	0	112	B2M,NHEJ1,VAV1,IRF1,STK11,CD74,CD28,IL15,CARD11,TBX21,NKAP,FCER1G,TCF7,BATF,CD4,ZAP70,ITK,CD3D,TNFSF8,PTPN22,LCK,SATB1,DOCK2,THEMIS,SLAMF6,RIPK3,RAG1,PTPRC,CCR7,BCL3,PLA2G2D,EOMES,IL7,CD3E,SPN,CD1D,LY9,IRF4,FOXP3,RHOH,ZFP36L2,STAT6,FZD5,RSAD2,CD8A,FAS,DNAJA3,BMX,MAFB,EGR1,STAT5B,RELB,PTGER4,IL7R,IFNG,CLEC4E	56	0.5	ABL1,ADAM17,ANXA1,ATG5,ATP7A,B2M,BATF,BCL11B,BCL2,BCL3,BMX,BRAF,CARD11,CCR7,CD1D,CD28,CD3D,CD3E,CD4,CD74,CD8A,CDK6,CHD7,CLEC4E,CTNNB1,DLL4,DNAJA3,DOCK2,EGR1,EOMES,FADD,FAS,FCER1G,FOXN1,FOXP1,FOXP3,FUT7,FZD5,FZD7,FZD8,GATA3,GLI3,HMGB1,IFNG,IL15,IL18R1,IL6,IL7,IL7R,IRF1,IRF4,ITK,ITPKB,JAG2,JMJD6,KIT,LCK,LEF1,LEPR,LFNG,LIG4,LY9,MAFB,NHEJ1,NKAP,PATZ1,PIK3CD,PKNOX1,PLA2G2D,PPP3CB,PREX1,PRKDC,PTGER4,PT…	Human
NCB-CB	_tstat	within each collection	BP: GO biological process	GO_COENZYME_BIOSYNTHETIC_PROCESS	0.000506	0.00530695	-0.408144	-1.94085	0	109	COQ2,ME1,SPR,PPCS,MAT2B,PCBD1,ACOT4,QPRT,DLD,PPT2,NADK,NMNAT1,PPCDC,MOCS2,ACSS2,ACSL5,NMNAT2,ACOT9,PCBD2,COQ7,MOCS1,THEM4,HSD17B12,DHFR,PANK1,PNPO,KYNU,GCH1,TPK1,MOCOS,COASY,RFK,ACOT2,QDPR,SLC25A1,MTHFS,PDHA1,ACOT1,ACSL3,KMO,SLC25A16,LIAS,ACSL4,MLYCD,ACOT13,NAMPT,PDXK,ACOT7,PTS	49	0.449541	ACACA,ACACB,ACLY,ACOT1,ACOT11,ACOT12,ACOT13,ACOT2,ACOT4,ACOT7,ACOT8,ACOT9,ACSF2,ACSF3,ACSL1,ACSL3,ACSL4,ACSL5,ACSL6,ACSS1,ACSS2,AFMID,AGK,ASPDH,ATIC,COASY,COQ2,COQ3,COQ4,COQ5,COQ6,COQ7,COQ9,DCAKD,DHFR,DLAT,DLD,ELOVL1,ELOVL2,ELOVL3,ELOVL5,ELOVL6,ELOVL7,FASN,FLAD1,FPGS,GART,GCDH,GCH1,GPHN,HAAO,HSD17B12,KMO,KYNU,LIAS,LIPT2,MAT1A,MAT2A,MAT2B,ME1,MLYCD,MOCOS,MOCS1,MOCS2,MOCS3,MTHFD1,MTHFD1L,MTHFD2,MTH…	Human
NCB-CB	_tstat	within each collection	BP: GO biological process	GO_RESPONSE_TO_VIRUS	0.000588	0.00532009	-0.367951	-1.93315	0	213	CD40,APOBEC3D,APOBEC3G,PSMB9,TRIM25,ZC3HAV1,TRIM34,OAS1,HERC5,IRF1,LILRB1,FAM111A,BST2,TBX21,DEFA1,BATF3,DHX58,CD86,IFIT3,C19orf66,IFIT5,APOBEC3F,MX1,IFITM1,MAPK14,IRF5,OAS3,OAS2,NLRC5,IL33,TRIM22,SLFN11,FGR,EIF2AK2,GBP1,IFNAR2,IFNAR1,IL10RB,ITCH,MEF2C,IFIT2,APOBEC3C,TLR8,IFIT1,PTPRC,IFIH1,BCL3,ISG20,HYAL3,AP1S1,BAD,CCL8,IFI44L,DDX60,PRF1,UNC13D,CCL4,MAPK11,LYST,TRIM56,NLRP3,TLR7,PLSCR1,PYCARD,FO…	107	0.502347	ABCC9,ABCE1,ABCF3,ACTA2,ADAR,ADARB1,AGBL4,AGBL5,AIMP1,AP1S1,APOB,APOBEC3A,APOBEC3B,APOBEC3C,APOBEC3D,APOBEC3F,APOBEC3G,ATG7,BAD,BANF1,BATF3,BCL2,BCL2L1,BCL2L11,BCL3,BECN1,BNIP3,BNIP3L,BST2,BTBD17,C19orf66,CARD9,CCDC130,CCL11,CCL19,CCL22,CCL4,CCL5,CCL8,CCT5,CD207,CD40,CD86,CD8A,CDK6,CFL1,CHRM2,CHUK,CLU,CRCP,CREBZF,CXADR,CXCL10,CXCL12,CXCL9,CXCR4,CYP1A1,DCLK1,DDIT4,DDX1,DDX21,DDX3X,DDX41,DDX58,DDX6…	Human
NCB-CB	_tstat	within each collection	BP: GO biological process	GO_POSITIVE_REGULATION_OF_RESPONSE_TO_WOUNDING	0.000546	0.00530695	-0.391631	-1.93211	0	142	GPSM3,CLOCK,VAMP8,TNIP1,CCL4L2,CCL24,CD28,CCL3,IL15,PLEK,LTA,VAMP7,IL17RA,FCER1G,HPSE,IL33,TLR4,NOD2,TNFRSF11A,ETS1,CAPN3,ANO6,GBP5,SELP,JAK2,IL17RC,TLR2,IL1B,CCR7,IL18,CD6,PIK3CG,CCL8,PTGER3,XCL2,CCR2,CCL4,CD36,TNFRSF1A,TLR7,AGER,TLR10,MYLK,CCL7,ADAM8,OSM,CCL5,CCL23,RREB1,TLR3,IL23A,S100A9,SCARF1,STAT5B,CX3CL1,TNF,PTGER4,CCL13,CCL18,TNFSF11,GPRC5B,TGFBR2,KLKB1,F3	64	0.450704	ADAM8,ADORA2B,ADRA2A,AGER,AGT,AGTR1,ANO6,ANXA1,APOH,ARFGEF1,BRAF,C3,CAPN3,CCL11,CCL13,CCL14,CCL15,CCL16,CCL18,CCL2,CCL23,CCL24,CCL3,CCL4,CCL4L2,CCL5,CCL7,CCL8,CCR2,CCR7,CD28,CD36,CD47,CD6,CDK19,CLOCK,CNR1,CNTF,CPB2,CREB3L3,CX3CL1,EDNRA,ENPP4,ETS1,F12,F2,F2R,F3,F7,FABP4,FCER1A,FCER1G,FKBP1B,FOXC2,GBP5,GPRC5B,GPSM3,HBEGF,HMGB1,HOPX,HPSE,HRAS,HRG,HYAL2,IDO1,IL15,IL17RA,IL17RB,IL17RC,IL18,IL1B,IL1RL1…	Human
NCB-CB	_tstat	within each collection	BP: GO biological process	GO_POSITIVE_REGULATION_OF_NF_KAPPAB_TRANSCRIPTION_FACTOR_ACTIVITY	0.000526	0.00530695	-0.397739	-1.93163	0	126	CD40,NFKB1,TRIM25,NTRK1,PRKCQ,CLOCK,AIM2,BTK,IRAK2,TRADD,CARD11,TIRAP,MID2,TRIM22,EIF2AK2,TRIM14,ITGB2,TLR4,NOD2,TNFRSF11A,CAPN3,MTDH,RIPK2,PRKCH,RIPK3,TLR2,IL1B,RIPK1,CD40LG,CIB1,TRIM38,PRDX3,IL6R,TAB2,NFKBIB,CAMK2A,NLRP3,AGER,PYCARD,ADAM8,RPS6KA4,IKBKG,NFKBIA,EDA,NLRC4,TRIM5,TLR3,RELA,LGALS9,S100A9,PRKCB	51	0.404762	ADAM8,AGER,AGT,AIM2,ALK,AMH,AR,ARHGEF2,BCL10,BTK,CAMK2A,CAPN3,CARD11,CARD14,CAT,CD40,CD40LG,CFLAR,CHUK,CIB1,CLOCK,CLU,CTH,DDRGK1,EDA,EDA2R,EIF2AK2,ERC1,FER,GREM1,HSPA1A,HSPA1B,ICAM1,IKBKB,IKBKG,IL1B,IL6,IL6R,IRAK1,IRAK2,IRAK3,ITGB2,KRAS,LGALS9,LTF,MALT1,MAP3K13,MAP3K7,MID2,MTDH,MTPN,NFKB1,NFKB2,NFKBIA,NFKBIB,NLRC4,NLRP3,NOD1,NOD2,NPM1,NTRK1,PRDX3,PRKCB,PRKCH,PRKCI,PRKCQ,PRKCZ,PRKD1,PRKD2,PSMA6,PY…	Human
NCB-CB	_tstat	within each collection	BP: GO biological process	GO_REGULATION_OF_PHAGOCYTOSIS	0.000476	0.00530695	-0.457814	-1.93137	0	59	RAB27A,C2,BLK,STAP1,NCKAP1L,FCER1G,RAP1A,CSK,FGR,DOCK2,ANO6,CD300A,IL1B,SFTPD,HCK,PPARG,SYT7,BCR,CD36,AGER,PYCARD,MERTK,CYBA,ABCA7,PROS1,TNF,PTEN	27	0.457627	ABCA7,ABR,ADIPOQ,AGER,AHSG,ANO6,BCR,BLK,C2,C3,C4A,C4B,C4BPA,C4BPB,CALR,CAMK1D,CCL2,CD300A,CD36,CD47,CSK,CYBA,DNM2,DOCK2,F2RL1,FCER1G,FGR,GAS6,GATA2,HCK,HMGB1,IL1B,ITGA2,ITGAV,LBP,LMAN2,MBL2,MERTK,MFGE8,NCKAP1L,PLD1,PLD2,PPARG,PRKCG,PROS1,PTEN,PTX3,PYCARD,RAB27A,RAP1A,SCARB1,SFTPD,SLC11A1,SNX3,STAP1,SYK,SYT7,TNF,TUB	Human
NCB-CB	_tstat	within each collection	BP: GO biological process	GO_REGULATION_OF_TUMOR_NECROSIS_FACTOR_BIOSYNTHETIC_PROCESS	0.00172712	0.0109735	-0.644141	-1.93025	3	15	TLR1,LILRB1,IL10,TLR4,BCL3,UBE2J1,SPN,CCR2,TNFRSF8	9	0.6	BCL3,CARD9,CCR2,ERRFI1,HSPB1,IL10,LBP,LILRB1,MAPKAPK2,SPN,THBS1,TLR1,TLR4,TNFRSF8,UBE2J1	Human
NCB-CB	_tstat	within each collection	BP: GO biological process	GO_REGULATION_OF_TYPE_I_INTERFERON_PRODUCTION	0.000504	0.00530695	-0.407191	-1.92585	0	106	UBA7,NFKB1,TRIM25,ZC3HAV1,UBE2L6,HERC5,IRF1,CYLD,LILRB1,TRIM21,MYD88,NLRX1,DTX4,IL10,DHX58,HAVCR2,TIRAP,POLR2E,IRF5,NLRC5,PPM1B,PTPN22,NMI,TLR4,IFNAR1,RIPK2,ITCH,TLR2,TLR8,IFIH1,CD14,OTUD5,POLR2L,TRIM38,TRIM56,ZBP1,TLR7,PYCARD,STAT6,POLR3G,TLR3,RELA,IFI16,TRAF3,ISG15,IRF7,TNFAIP3,RELB	48	0.45283	CD14,CRCP,CREBBP,CTNNB1,CYLD,DDX3X,DDX41,DDX58,DHX36,DHX58,DHX9,DTX4,EP300,FLOT1,HAVCR2,HERC5,HMGB1,HMGB2,HSPD1,IFI16,IFIH1,IFNAR1,IKBKE,IL10,IRAK1,IRF1,IRF3,IRF5,IRF7,ISG15,ITCH,LILRB1,LRRFIP1,MAVS,MYD88,NFKB1,NFKB2,NLRC5,NLRX1,NMI,OTUD5,PCBP2,PIN1,PLCG2,POLR1C,POLR1D,POLR2E,POLR2F,POLR2H,POLR2K,POLR2L,POLR3A,POLR3B,POLR3C,POLR3D,POLR3E,POLR3F,POLR3G,POLR3GL,POLR3H,POLR3K,PPM1B,PRKDC,PTPN22,PYCA…	Human
NCB-CB	_tstat	within each collection	BP: GO biological process	GO_T_CELL_RECEPTOR_SIGNALING_PATHWAY	0.000536	0.00530695	-0.389935	-1.92449	0	138	NFKB1,PSMB8,PSMB9,PSME1,PSMB10,PRKCQ,STK11,CD28,TRAC,PSMA4,CARD11,HLA-DPA1,HLA-DRA,LAT,TRAT1,WAS,CD4,ZAP70,BTN3A1,CSK,ITK,CD3D,SKAP1,PSMA5,CD247,FBXW11,LCK,THEMIS,UBE2D1,RIPK2,HLA-DPB1,TXK,PTPRC,INPP5D,SKP1,CD3E,RFTN1,TRBC1,LCP2,TAB2,MAPK1,PSME2,FOXP3,IKBKG,NFKBIA,GRAP2,PSMC2,PSMB2,PIK3R1,RELA,HLA-DQA2,PAG1,PTEN,PIK3CB,PTPRJ,PSMD5,IFNG,PSMC6,PSMD1,CD3G,TNFRSF21,PSMA1,PDPK1,PSMB6,PSMD12,PDE4B,PIK3…	69	0.5	BCAR1,BCL10,BTN3A1,BTRC,CACNB3,CACNB4,CARD11,CD247,CD28,CD3D,CD3E,CD3G,CD4,CHUK,CSK,CUL1,DENND1B,FBXW11,FOXP3,FYN,GATA3,GRAP2,HLA-DPA1,HLA-DPB1,HLA-DQA1,HLA-DQA2,HLA-DQB1,HLA-DQB2,HLA-DRA,HLA-DRB1,HLA-DRB5,HRAS,IFNG,IKBKB,IKBKG,INPP5D,ITK,LAT,LCK,LCP2,LIME1,MALT1,MAP3K7,MAPK1,NCK1,NFKB1,NFKBIA,PAG1,PAK1,PAK2,PAK3,PDE4B,PDE4D,PDPK1,PIK3CA,PIK3CB,PIK3CD,PIK3R1,PIK3R2,PLCG1,PLCG2,PRKCQ,PRKD2,PSEN1,P…	Human
NCB-CB	_tstat	within each collection	BP: GO biological process	GO_REGULATION_OF_T_CELL_DIFFERENTIATION	0.000501	0.00530695	-0.417651	-1.92125	0	92	HLA-DOA,IL1RL2,IRF1,IL4R,CYLD,CD74,CD28,RASGRP1,IL15,CARD11,NCKAP1L,CD86,NKAP,ZAP70,ADA,SASH3,CD80,IL12RB1,RIPK2,SOX13,RAG1,LILRB2,IL1B,XBP1,BAD,IL7,IL2RA,HLX,HLA-G,NLRP3,SOD1,AP3D1,PIK3R6,IRF4,FOXP3,ADAM8,CTLA4,JAK3,LGALS9,IL23A,CD2,IL27,STAT5B,IL7R,CCL19,TGFBR2,IFNG,BMP4	48	0.521739	ADA,ADAM8,ANXA1,AP3B1,AP3D1,BAD,BCL6,BMP4,CAMK4,CARD11,CCL19,CD2,CD28,CD46,CD74,CD80,CD83,CD86,CDKN2A,CLPTM1,CTLA4,CYLD,CYP26B1,DTX1,EGR3,ERBB2,FOXJ1,FOXN1,FOXP3,GATA3,GLI2,GLI3,HLA-DOA,HLA-G,HLX,HMGB1,IFNG,IHH,IL12A,IL12RB1,IL15,IL1B,IL1RL2,IL23A,IL27,IL2RA,IL4R,IL6,IL7,IL7R,IRF1,IRF4,ITPKB,JAK3,LGALS9,LILRB2,MYB,NCKAP1L,NKAP,NLRP3,NRARP,PIK3R6,PNP,PRELID1,PRKCZ,PTPN2,RAG1,RARA,RASGRP1,RC3H1,RIP…	Human
NCB-CB	_tstat	within each collection	BP: GO biological process	GO_POSITIVE_REGULATION_OF_PRODUCTION_OF_MOLECULAR_MEDIATOR_OF_IMMUNE_RESPONSE	0.000477	0.00530695	-0.466733	-1.91743	0	53	CD40,B2M,TNFRSF14,HLA-E,IL4R,CD74,CD28,HLA-A,TBX21,FCER1G,IL33,TLR4,SASH3,XBP1,TNFRSF4,CD36,NLRP3,MZB1,STAT6,FZD5,CD244,STX4,RSAD2	23	0.433962	B2M,BCL10,CD244,CD28,CD36,CD40,CD74,CLCF1,EXOSC3,F2RL1,FCER1G,FZD5,GATA3,GPRC5B,HLA-A,HLA-E,HPX,IFNG,IL33,IL4R,IL6,KLK5,KLK7,MALT1,MAP3K7,MIF,MSH6,MZB1,NLRP3,NR4A3,PAXIP1,PRKCZ,RBP4,RSAD2,SASH3,SEMA7A,SPON2,STAT6,STX4,TBX21,TLR4,TNFRSF14,TNFRSF4,TNFSF13,TNFSF4,TRAF2,TRAF6,TRIM6,UNG,VAMP3,WNT5A,XBP1,XCL1	Human
NCB-CB	_tstat	within each collection	BP: GO biological process	GO_TRICARBOXYLIC_ACID_METABOLIC_PROCESS	0.000898	0.00646283	-0.511565	-1.91653	1	35	IDH3A,SDHD,SDHA,SUCLG1,DLD,STAT5A,SIRT4,MDH1,SUCLG2,GLUD1,SDHB,PDHA1,IDH1,IDH3G,FH,STAT5B,MDH2,ACO2,NNT,DHTKD1,ACO1	21	0.6	ACLY,ACO1,ACO2,ASS1,CS,DHTKD1,DLAT,DLD,DLST,FH,GHR,GLUD1,IDH1,IDH2,IDH3A,IDH3B,IDH3G,MDH1,MDH1B,MDH2,NNT,OGDH,OGDHL,PDHA1,PDHB,SDHA,SDHB,SDHC,SDHD,SIRT4,STAT5A,STAT5B,SUCLA2,SUCLG1,SUCLG2	Human
NCB-CB	_tstat	within each collection	BP: GO biological process	GO_NEGATIVE_REGULATION_OF_CELL_KILLING	0.0021589	0.0128867	-0.639052	-1.915	4	15	HLA-E,LILRB1,TAP1,HLA-A,HLA-B,HAVCR2,SERPINB9,PTPRC,ARRB2,LGALS9,IL7R	11	0.733333	ARRB2,CEACAM1,HAVCR2,HLA-A,HLA-B,HLA-E,IGF2,IL7R,LGALS9,LILRB1,MICA,PPP3CB,PTPRC,SERPINB9,TAP1	Human
NCB-CB	_tstat	within each collection	BP: GO biological process	GO_REGULATION_OF_I_KAPPAB_KINASE_NF_KAPPAB_SIGNALING	0.000594	0.00532127	-0.363345	-1.9146	0	220	CD40,ZFAND6,TRIM25,ZC3HAV1,CASP10,PRKCQ,CASP8,APOL3,CYLD,UNC5CL,TNIP1,TICAM2,BIRC3,MYD88,NLRX1,BST2,TRADD,IL10,CARD11,TLR6,TIRAP,MAP3K14,FASLG,MID2,PPM1B,TRIM22,CASP1,FBXW11,TLR4,NOD2,TNIP3,CAPN3,HTR2B,MTDH,RIPK2,NLRP6,SHISA5,TLR2,SHARPIN,IL1B,RHOC,CCDC22,RIPK1,CD27,CCR7,BCL3,IL18,LTBR,S100A13,NLRC3,TRIM38,TNFSF10,TAB2,CD36,NFKBIB,CCL21,TNFRSF1A,PINK1,NLRP3,IRAK4,TLR7,PYCARD,RHOH,TNFSF14,IKBKG,NF…	90	0.409091	ABL1,ADIPOQ,AKAP13,ANGPT1,ANKRD17,APOL3,ASH1L,ATP2C1,BCL10,BCL3,BIRC2,BIRC3,BMP7,BRD4,BST2,BTRC,C18orf32,C1QTNF3,CANT1,CAPN3,CARD11,CARD8,CARD9,CASP1,CASP10,CASP8,CC2D1A,CCDC22,CCL19,CCL21,CCR7,CD27,CD36,CD40,CFLAR,CHUK,CLEC6A,CPNE1,CTH,CTNNB1,CXXC5,CYLD,DAB2IP,DDRGK1,DNAJA3,ECM1,ECT2,EDA,EDA2R,EDAR,EEF1D,ESR1,F2R,F2RL1,FADD,FAF1,FASLG,FBXW11,FKBP1A,FLNA,FYN,G3BP2,GJA1,GOLT1B,GPR89A,GPRC5B,GREM1,…	Human
NCB-CB	_tstat	within each collection	BP: GO biological process	GO_PHAGOCYTOSIS_ENGULFMENT	0.000899	0.00646283	-0.514356	-1.91344	1	34	ELMO1,AIF1,BIN2,VAMP7,IGLL5,FCER1G,TRDC,IGLC1,ABCA1,IGHG1,IGHG4,IGLC3,FCGR1A,IGKC,IGLC2,XKR8,IGHV3-23,IGHG2,IGHM,IGHG3	20	0.588235	ABCA1,AIF1,BECN1,BIN2,DOCK1,ELMO1,FCER1G,FCGR1A,GSN,GULP1,IGHA1,IGHA2,IGHD,IGHE,IGHG1,IGHG2,IGHG3,IGHG4,IGHM,IGHV3-23,IGKC,IGLC1,IGLC2,IGLC3,IGLC7,IGLL5,MFGE8,MYH9,RAC1,THBS1,TRDC,TREM2,VAMP7,XKR8	Human
NCB-CB	_tstat	within each collection	BP: GO biological process	GO_ANTIGEN_PROCESSING_AND_PRESENTATION	0.000583	0.00532009	-0.367787	-1.90967	0	195	B2M,PSMB8,HLA-DOA,PSMB9,RAB27A,RILP,CTSE,PSME1,ACE,HLA-DOB,HFE,PSMB10,TAP2,HLA-E,MICB,TAPBP,HLA-DMA,CD74,HLA-F,CYBB,PSMA4,TAP1,HLA-A,CTSF,HLA-C,HLA-B,HLA-DPA1,HLA-DRA,RAB32,PDIA3,SEC24A,FCER1G,CD209,CTSS,SEC24B,ERAP1,DYNC1I1,PSMA5,MARCH1,AP2A2,SAR1B,AP1S2,RAB8B,NCF1,HLA-DMB,HLA-DPB1,NCF4,CD1C,MARCH8,AP1S1,CD1E,FCGR1B,RFTN1,CD1D,FCGR1A,HLA-G,CD36,ABCB1,PSME2,AP3D1,SEC24C,ERAP2,FCGRT,PSMC2,ACTR1B,A…	76	0.389744	ABCB1,ABCB4,ABCB5,ABCB9,ACE,ACTR1A,ACTR1B,AP1B1,AP1G1,AP1M1,AP1M2,AP1S1,AP1S2,AP1S3,AP2A1,AP2A2,AP2B1,AP2M1,AP2S1,AP3B1,AP3D1,ARF1,ATG5,AZGP1,B2M,BCAP31,CALR,CANX,CD1A,CD1C,CD1D,CD1E,CD207,CD209,CD36,CD74,CD8A,CENPE,CLEC4M,CLTA,CLTC,CTSD,CTSE,CTSF,CTSH,CTSS,CYBA,CYBB,DCTN1,DCTN2,DCTN3,DCTN4,DCTN5,DCTN6,DNM2,DYNC1H1,DYNC1I1,DYNC1I2,DYNC1LI2,DYNC2H1,DYNC2LI1,DYNLL1,DYNLL2,ERAP1,ERAP2,FCER1G,FCGR1A,…	Human
NCB-CB	_tstat	within each collection	BP: GO biological process	GO_NEGATIVE_REGULATION_OF_INTERLEUKIN_12_PRODUCTION	0.0021589	0.0128867	-0.63581	-1.90528	4	15	NFKB1,LILRB1,ACP5,IL10,CMKLR1,SLAMF1,TNFRSF9,TIGIT,ARRB2,JAK3	10	0.666667	ACP5,ARRB2,C1QBP,CMKLR1,IL10,IRAK3,JAK3,LILRB1,MEFV,NFKB1,PIBF1,SLAMF1,THBS1,TIGIT,TNFRSF9	Human
NCB-CB	_tstat	within each collection	BP: GO biological process	GO_POSITIVE_REGULATION_OF_T_CELL_MEDIATED_IMMUNITY	0.000897	0.00646283	-0.53405	-1.90447	1	29	B2M,HLA-E,NCR3,HLA-A,HLA-B,SASH3,IL12RB1,IL1B,P2RX7,NLRP3,FOXP3,FZD5,RSAD2,IL23A	14	0.482759	B2M,FADD,FOXP3,FZD5,GATA3,HLA-A,HLA-B,HLA-E,HSPD1,IL12A,IL12RB1,IL1B,IL23A,MALT1,MAP3K7,NCR3,NLRP3,P2RX7,PRKCZ,PVR,RSAD2,SASH3,STX7,TNFSF4,TRAF2,TRAF6,XCL1,ZBTB1,ZP3	Human
NCB-CB	_tstat	within each collection	BP: GO biological process	GO_RIBONUCLEOSIDE_CATABOLIC_PROCESS	0.00263968	0.015056	-0.58656	-1.90269	5	20	APOBEC3G,UPP1,HPRT1,APOBEC3F,ADA,NUDT9,APOBEC3C	7	0.35	ADA,ADAL,AHCY,AMPD3,APOBEC3A,APOBEC3C,APOBEC3F,APOBEC3G,CDA,ENPP4,ENTPD4,HPRT1,MLYCD,NT5E,NUDT18,NUDT7,NUDT9,PNP,PRTFDC1,UPP1	Human
NCB-CB	_tstat	within each collection	BP: GO biological process	GO_NEGATIVE_REGULATION_OF_CYTOKINE_PRODUCTION	0.000571	0.00532009	-0.37029	-1.89755	0	179	UBA7,NFKB1,TRIM25,UBE2L6,HFE,ARRB1,HERC5,CD274,BANK1,CYLD,LILRB1,TICAM2,BTK,NLRX1,PDCD1LG2,BST2,SIGIRR,ACP5,IL10,SRGN,DHX58,NCKAP1L,ANXA4,HAVCR2,CSK,CD84,CMKLR1,NLRC5,IL33,PPM1B,PTPN22,GBP1,NMI,TLR4,ITCH,SLAMF1,BTN2A2,IFIH1,INPP5D,BCL3,SFTPD,MAP2K5,OTUD5,AXL,NLRC3,NFKBIL1,LAG3,IL6R,TNFRSF9,NLRP3,AGER,PYCARD,FOXP3,TIGIT,RPS6KA4,HMOX1,ARRB2,HSF1,JAK3,SCGB1A1,PML,LGALS9,IL23A,TRAF3,ANGPT1,ISG15,ZC3H…	73	0.407821	ACP5,ADIPOQ,AGER,ANGPT1,ANXA1,ANXA4,APOA1,APOA2,APOD,ARRB1,ARRB2,ASB1,AXL,BANK1,BCL3,BCL6,BST2,BTK,BTN2A2,C1QBP,C1QTNF3,CD24,CD274,CD276,CD2AP,CD34,CD83,CD84,CDH3,CHID1,CHRNA7,CMKLR1,CSK,CUEDC2,CX3CL1,CYLD,DDX58,DHX58,DLL1,ERRFI1,EZR,F2RL1,FBLN1,FN1,FOXJ1,FOXP3,FURIN,GAS6,GATA3,GATA6,GBA,GBP1,GPNMB,GSTP1,HAVCR2,HDAC7,HERC5,HFE,HGF,HLA-DRB1,HLA-DRB5,HMGB1,HMOX1,HSF1,IDO1,IFIH1,IFNG,IKBKE,IL10,IL12…	Human
NCB-CB	_tstat	within each collection	BP: GO biological process	GO_NEGATIVE_REGULATION_OF_TUMOR_NECROSIS_FACTOR_SUPERFAMILY_CYTOKINE_PRODUCTION	0.0013369	0.00906131	-0.500958	-1.89482	2	36	CD274,LILRB1,ACP5,IL10,HAVCR2,PTPN22,TLR4,SLAMF1,BCL3,AXL,NLRC3,NFKBIL1,FOXP3,ARRB2,HSF1,LGALS9,ZC3H12A,TNFAIP3,PTGER4	19	0.527778	ACP5,ADIPOQ,ARRB2,AXL,BCL3,CD274,CD34,CHRNA7,ERRFI1,FOXP3,GAS6,GPNMB,GSTP1,HAVCR2,HSF1,IL10,IRAK3,LBP,LGALS9,LILRB1,LTF,MC1R,NFKBIL1,NLRC3,NR1H4,ORM1,PTGER4,PTPN22,RARA,SLAMF1,TLR4,TNFAIP3,TRIM27,TSPO,TWIST1,ZC3H12A	Human
NCB-CB	_tstat	within each collection	BP: GO biological process	GO_NEGATIVE_REGULATION_OF_DEFENSE_RESPONSE	0.000512	0.00530695	-0.393013	-1.89165	0	118	NFKB1,NR1H3,HLA-E,MICB,TNFAIP8L2,LILRB1,NLRX1,TAP1,HLA-A,ACP5,IL10,HLA-B,SMAD3,DHX58,HAVCR2,NLRC5,ADA,PPM1B,SERPINB9,EIF2AK2,NMI,ETS1,DUSP10,TNFRSF1B,CNR2,NLRP6,ITCH,SHARPIN,IFIT1,CR1,PPARG,IL2RA,SPN,TRIM38,BCR,TNFRSF1A,NLRP3,SIRT2,FOXP3	39	0.330508	A2M,ABR,ACP5,ADA,ADAR,ADIPOQ,ADORA1,ADRB2,APCS,APOA1,APOD,APOE,ARRB2,ASH1L,BCR,C1QBP,C1QTNF3,CALCRL,CD276,CHID1,CNR2,CR1,CUEDC2,CX3CR1,DHX58,DNAJA3,DRD2,DUSP10,EIF2AK2,ETS1,FEM1A,FOXF1,FOXP3,GATA3,GBA,GPX1,GSTP1,HAVCR2,HGF,HLA-A,HLA-B,HLA-E,HTRA1,IFI16,IFIT1,IGF2,IL10,IL20RB,IL2RA,IRAK3,ITCH,KLF4,LGALS9,LILRB1,MAPK7,MEFV,METRNL,MICA,MICB,MUL1,MVK,NDFIP1,NFKB1,NLRC5,NLRP12,NLRP3,NLRP6,NLRX1,NMI,NR…	Human
NCB-CB	_tstat	within each collection	BP: GO biological process	GO_POSITIVE_REGULATION_OF_PEPTIDASE_ACTIVITY	0.000541	0.00530695	-0.383265	-1.89164	0	140	MAPK9,PSME1,CLPX,CASP3,ARRB1,CASP8,AIM2,HTRA2,MAP3K5,TRADD,SMAD3,AIFM1,NKX3-1,FASLG,RPS27L,ACVR1C,CASP7,CASP1,LCK,BCL2L13,JAK2,MAPK12,ACER2,RIPK1,TBC1D10A,CR1,BAD,PPARG,P2RX1,TNFSF15,TNFSF10,PINK1,NLRP3,PSME2,PYCARD,CAV1,BID,BCL2L10,NLRC4,PCOLCE2,DAP,CTSH,BAK1,PML,PPM1F,DAPK1,IFI16,LGALS9,FAS,BBC3,DNAJA3,S100A9	52	0.371429	ACER2,ACVR1C,ADRM1,AIFM1,AIM2,AKIRIN2,ANP32B,APAF1,APP,ARL6IP5,ARRB1,ASPH,BAD,BAK1,BAX,BBC3,BCAP31,BCL10,BCL2L10,BCL2L11,BCL2L13,BID,BOK,CARD8,CASP1,CASP2,CASP3,CASP7,CASP8,CASP8AP2,CASP9,CAV1,CDKN1B,CDKN2A,CIDEB,CLPX,COL4A3,CR1,CRADD,CTSH,CYCS,CYFIP2,DAP,DAPK1,DDX3X,DIABLO,DLC1,DNAJA3,EGLN3,EIF2AK3,F2R,F3,FADD,FAM162A,FAS,FASLG,FBLN1,FIS1,FN1,FOXL2,GSN,HIP1,HMGB1,HSPD1,HSPE1,HTRA2,IFI16,IFI27,IF…	Human
NCB-CB	_tstat	within each collection	BP: GO biological process	GO_REGULATION_OF_TOLL_LIKE_RECEPTOR_SIGNALING_PATHWAY	0.00046	0.00530695	-0.473938	-1.8901	0	45	NR1H3,IRF1,TICAM2,BIRC3,PIK3AP1,LY96,TIRAP,PTPN22,TLR4,NR1D1,WDFY1,NLRP6,TLR2,CD14,NFKBIL1,LYN,IRF4,CAV1,ARRB2,GFI1,TLR3,RSAD2,CYBA,IRF7,TNFAIP3	25	0.555556	ARRB2,BIRC2,BIRC3,CAV1,CD14,CYBA,DAB2IP,F2RL1,FLOT1,FLOT2,GFI1,HMGB1,IRAK3,IRF1,IRF4,IRF7,LBP,LGR4,LTF,LY96,LYN,NFKBIL1,NLRP6,NR1D1,NR1H3,PDPK1,PELI1,PIK3AP1,PTPN22,RAB7B,RSAD2,SARM1,SMPDL3B,TICAM1,TICAM2,TIRAP,TLR2,TLR3,TLR4,TLR5,TLR9,TNFAIP3,TYRO3,UBQLN1,WDFY1	Human
NCB-CB	_tstat	within each collection	BP: GO biological process	GO_TUMOR_NECROSIS_FACTOR_MEDIATED_SIGNALING_PATHWAY	0.000509	0.00530695	-0.394685	-1.88946	0	113	CD40,PSMB8,TNFRSF14,PSMB9,PSME1,TNFSF13B,PSMB10,AIM2,BIRC3,PSMA4,TRADD,TNFRSF13B,TNFSF12,LTA,LTB,MAP3K14,PSMA5,TNFRSF17,TNFRSF11A,TNFRSF1B,JAK2,RIPK1,CD27,TNFRSF11B,LTBR,CD40LG,TNFRSF4,TNFSF15,TNFRSF8,TNFRSF1A,TNFRSF9,PSME2,PYCARD,TNFRSF18,TNFSF14,EDA,PSMC2,PSMB2,TNFRSF10C,TRAF3,FAS,PTK2B,TNF,TNFSF11,PSMD5,PSMC6,PSMD1,TNFRSF21,PSMA1,COMMD7,STAT1,PSMB6,PSMD12,EDAR	54	0.477876	ADAM17,AIM2,BAG4,BIRC2,BIRC3,CARD14,CD27,CD40,CD40LG,CD70,COMMD7,EDA,EDA2R,EDAR,EDARADD,FAS,FOXO3,IKBKB,JAK2,KRT18,KRT8,LTA,LTB,LTBR,MAP3K14,NGFR,PLVAP,PSMA1,PSMA2,PSMA3,PSMA4,PSMA5,PSMA6,PSMA7,PSMB1,PSMB10,PSMB2,PSMB3,PSMB4,PSMB5,PSMB6,PSMB7,PSMB8,PSMB9,PSMC1,PSMC2,PSMC3,PSMC4,PSMC5,PSMC6,PSMD1,PSMD10,PSMD11,PSMD12,PSMD13,PSMD14,PSMD2,PSMD3,PSMD4,PSMD5,PSMD6,PSMD7,PSMD8,PSMD9,PSME1,PSME2,PSME3,P…	Human
NCB-CB	_tstat	within each collection	BP: GO biological process	GO_REGULATION_OF_IMMUNOGLOBULIN_SECRETION	0.00259067	0.0148025	-0.630433	-1.88917	5	15	CD40,HLA-E,IL33,XBP1,CD40LG,TNFRSF4,STX4,TMBIM6,TNF	9	0.6	CD40,CD40LG,HLA-E,IL33,IL6,RBP4,STX4,TMBIM6,TNF,TNFRSF4,TNFSF4,TRAF2,TRAF6,VAMP3,XBP1	Human
NCB-CB	_tstat	within each collection	BP: GO biological process	GO_ADAPTATION_OF_SIGNALING_PATHWAY	0.00259067	0.0148025	-0.629993	-1.88785	5	15	ARRB1,GTF2H2,GIPR,HTR2B,GRK5,PTGER3,ARRB2,DRD2	8	0.533333	ADM,ADRB2,ARRB1,ARRB2,DNM1,DNM2,DRD2,GIPR,GRK4,GRK5,GRK6,GTF2H2,HTR2B,PTGER3,RDH11	Human
NCB-CB	_tstat	within each collection	BP: GO biological process	GO_B_CELL_ACTIVATION	0.00051	0.00530695	-0.400301	-1.88638	0	105	NBN,CD40,ATP11C,NHEJ1,LYL1,NTRK1,CASP8,POU2F2,LAT2,BANK1,BTK,BST2,AKAP17A,IL10,HHEX,CD180,CD86,BATF,ZAP70,FNIP1,MS4A1,ADA,TLR4,MFNG,ITGA4,NFAM1,FLT3,RAG1,MEF2C,PTPRC,BCL3,CXCR5,CD40LG,VCAM1,LAX1	35	0.333333	ABL1,ADA,ADAM17,AKAP17A,ATM,ATP11C,BAK1,BANK1,BATF,BAX,BCL2,BCL3,BCL6,BLNK,BST2,BTK,CASP8,CD180,CD40,CD40LG,CD79A,CD79B,CD86,CEBPG,CHRNA4,CLCF1,CMTM7,CR2,CXCR5,DCLRE1C,DLL1,EP300,ERCC1,EXO1,EXOSC3,EXOSC6,FLT3,FNIP1,FZD9,GAPT,GPR183,HDAC4,HDAC5,HDAC9,HHEX,HSPD1,ICOSLG,IGBP1,IKZF3,IL10,IL11,IL7R,ITFG2,ITGA4,ITGB1,JAK3,KIT,KLF6,LAT2,LAX1,LEF1,LFNG,LGALS1,LIG4,LRRC8A,LYL1,MALT1,MEF2C,MFNG,MLH1,MS4A1,…	Human
NCB-CB	_tstat	within each collection	BP: GO biological process	GO_REGULATION_OF_DEFENSE_RESPONSE_TO_VIRUS_BY_VIRUS	0.00134589	0.00906131	-0.528307	-1.88399	2	29	B2M,CD28,HLA-A,ELMO1,CD4,EIF2AK2,CD247,AP2A2,LCK,DOCK2,AP1S2,AP1S1,HCK,CD8B	14	0.482759	AP1B1,AP1G1,AP1M1,AP1M2,AP1S1,AP1S2,AP1S3,AP2A1,AP2A2,AP2B1,AP2M1,AP2S1,ARF1,ATP6V1H,B2M,CD247,CD28,CD4,CD8B,DOCK2,EIF2AK2,ELMO1,FYN,HCK,HLA-A,LCK,PACS1,PAK2,RAC1	Human
NCB-CB	_tstat	within each collection	BP: GO biological process	GO_T_CELL_MEDIATED_IMMUNITY	0.00268336	0.0152246	-0.54755	-1.88151	5	25	RAB27A,MICB,BTN3A2,BTN3A3,CRTAM,MYO1G,SLAMF1,RFTN1,FOXP3,IL31RA,CTSH,CD8A	12	0.48	BTN3A2,BTN3A3,CADM1,CD46,CD55,CD8A,CRTAM,CTSC,CTSH,DENND1B,DLG1,EMP2,FOXP3,GATA3,GNL1,ICAM1,IL31RA,JAG1,MICA,MICB,MYO1G,RAB27A,RFTN1,SLAMF1,SLC11A1	Human
NCB-CB	_tstat	within each collection	BP: GO biological process	GO_ACTIVATION_OF_CYSTEINE_TYPE_ENDOPEPTIDASE_ACTIVITY	0.000496	0.00530695	-0.411024	-1.88118	0	90	MAPK9,CASP3,CASP8,TRADD,SMAD3,AIFM1,NKX3-1,FASLG,RPS27L,CASP7,CASP1,LCK,BCL2L13,JAK2,ACER2,RIPK1,TBC1D10A,BAD,PPARG,P2RX1,TNFSF15,TNFSF10,NLRP3,PYCARD,BID,BCL2L10,NLRC4,DAP,CTSH,BAK1,PML,IFI16,FAS,BBC3,DNAJA3,S100A9,IFI27,TNF	38	0.422222	ACER2,AIFM1,ANP32B,APAF1,ASPH,BAD,BAK1,BAX,BBC3,BCL2L10,BCL2L11,BCL2L13,BID,BOK,CARD8,CASP1,CASP2,CASP3,CASP7,CASP8,CASP8AP2,CASP9,CDKN1B,CDKN2A,CIDEB,COL4A3,CRADD,CTSH,CYCS,CYFIP2,DAP,DIABLO,DLC1,DNAJA3,EGLN3,EIF2AK3,F2R,F3,FADD,FAM162A,FAS,FASLG,HIP1,HSPD1,HSPE1,IFI16,IFI27,IFT57,JAK2,LCK,MAPK9,MTCH1,MUL1,NGF,NGFR,NKX3-1,NLRC4,NLRP1,NLRP12,NLRP3,NOD1,P2RX1,PAWR,PDCD2,PDCD6,PERP,PMAIP1,PML,PPARG…	Human
NCB-CB	_tstat	within each collection	BP: GO biological process	GO_FC_EPSILON_RECEPTOR_SIGNALING_PATHWAY	0.000536	0.00530695	-0.381151	-1.88113	0	138	MAPK9,NFKB1,PSMB8,PSMB9,PSME1,PSMB10,VAV1,PRKCQ,IGLV7-43,LAT2,IGHV2-70,BTK,PSMA4,IGKV1D-33,CARD11,NFATC2,IGKV3D-20,LAT,IGKV3D-11,FCER1G,ITK,PSMA5,FBXW11,UBE2D1,IGLC1,IGKV1-5,SKP1,MAPK3,CALM3,IGLC3,IGKV4-1,IGKC,LCP2,TAB2,MAPK1,LYN,PSME2,IGLC2,IKBKG,NFKBIA,GRAP2,PSMC2,PSMB2,PIK3R1,IGHV3-23,RELA,PPP3CA,GAB2,PPP3R1,TEC,PIK3CB,PSMD5,IGKV3-20,PSMC6,PSMD1,PSMA1,PDPK1,PSMB6,PSMD12,MAP3K1,PSMD9,SHC1,RPS27A	63	0.456522	BCL10,BTK,BTRC,CALM1,CALM2,CALM3,CARD11,CHUK,CUL1,FBXW11,FCER1A,FCER1G,FER,FOS,GAB2,GRAP2,GRB2,HRAS,IGHE,IGHV2-70,IGHV3-23,IGKC,IGKV1-5,IGKV1D-33,IGKV2-40,IGKV3-20,IGKV3D-11,IGKV3D-20,IGKV4-1,IGLC1,IGLC2,IGLC3,IGLC7,IGLV7-43,IKBKB,IKBKG,ITK,JUN,KRAS,LAT,LAT2,LCP2,LYN,MALT1,MAP2K4,MAP2K7,MAP3K1,MAP3K7,MAPK1,MAPK10,MAPK3,MAPK8,MAPK9,MS4A2,NFATC1,NFATC2,NFATC3,NFKB1,NFKBIA,NR4A3,NRAS,PAK1,PAK2,PDPK1…	Human
NCB-CB	_tstat	within each collection	BP: GO biological process	GO_PHAGOCYTOSIS_RECOGNITION	0.00134589	0.00906131	-0.526775	-1.87853	2	29	MEGF10,IGLL5,TRDC,FCN1,IGLC1,IGHG1,IGHG4,IGLC3,IGKC,CD36,IGLC2,CLEC7A,PEAR1,IGHV3-23,IGHG2,SCARB1,IGHM,IGHG3,IGHA1,IGHE,IGLC7,FCN2	22	0.758621	CD36,CLEC7A,COLEC12,FCN1,FCN2,FCN3,IGHA1,IGHA2,IGHD,IGHE,IGHG1,IGHG2,IGHG3,IGHG4,IGHM,IGHV3-23,IGKC,IGLC1,IGLC2,IGLC3,IGLC7,IGLL5,JMJD6,MEGF10,MFGE8,PEAR1,SCARB1,TRDC,TUB	Human
NCB-CB	_tstat	within each collection	BP: GO biological process	GO_POSITIVE_REGULATION_OF_CD4_POSITIVE_ALPHA_BETA_T_CELL_ACTIVATION	0.00268336	0.0152246	-0.545917	-1.8759	5	25	PRKCQ,IL4R,NCKAP1L,CD86,SASH3,CD80,IL12RB1,RIPK2,HLX,NLRP3,FOXP3,LGALS9,IL23A,CCL19,IFNG,CD83	16	0.64	ANXA1,CCL19,CD55,CD80,CD83,CD86,FOXP3,HLX,IFNG,IL12RB1,IL23A,IL4R,IL6,LGALS9,MYB,NCKAP1L,NLRP3,PRKCQ,PRKCZ,RARA,RIPK2,SASH3,SOCS5,TNFSF4,XCL1	Human
NCB-CB	_tstat	within each collection	BP: GO biological process	GO_POSITIVE_REGULATION_OF_INTERLEUKIN_4_PRODUCTION	0.00307963	0.0167669	-0.578258	-1.87576	6	20	PRKCQ,HLA-E,CD28,CD86,HAVCR2,IL33,SASH3,CD40LG,CD3E,NLRP3,IRF4,FOXP3	12	0.6	CD28,CD3E,CD40LG,CD86,CEBPB,FOXP3,GATA3,HAVCR2,HLA-E,IL20RB,IL33,IRF4,LGALS9,NLRP3,PRKCQ,PRKCZ,RARA,SASH3,TNFSF4,ZP3	Human
NCB-CB	_tstat	within each collection	BP: GO biological process	GO_REGULATION_OF_ALPHA_BETA_T_CELL_DIFFERENTIATION	0.000907	0.00650702	-0.474573	-1.87292	1	43	IL4R,NCKAP1L,CD86,NKAP,ZAP70,ADA,SASH3,CD80,IL12RB1,RIPK2,HLX,NLRP3,AP3D1,IRF4,FOXP3,JAK3,LGALS9,IL23A,IL27,CCL19,TGFBR2,IFNG	22	0.511628	ADA,ANXA1,AP3B1,AP3D1,BCL6,CCL19,CD80,CD83,CD86,FOXP3,GATA3,GLI3,HLX,HMGB1,IFNG,IHH,IL12RB1,IL23A,IL27,IL4R,IL6,IRF4,ITPKB,JAK3,LGALS9,MYB,NCKAP1L,NKAP,NLRP3,PNP,PRKCZ,RARA,RC3H1,RIPK2,SASH3,SHH,SOCS5,SYK,TGFBR2,TNFSF18,TNFSF4,ZAP70,ZBTB16	Human
NCB-CB	_tstat	within each collection	BP: GO biological process	GO_PROTEIN_LIPID_COMPLEX_SUBUNIT_ORGANIZATION	0.00134771	0.00906131	-0.498997	-1.86945	2	35	DGAT1,SNX9,BIN1,MPO,SOAT1,PLTP,ABCG1,ABCA1,CETP,ACSL3,LIPC,ABCA7,SCARB1,APOC1,APOE,AGTR1	16	0.457143	ABCA1,ABCA5,ABCA7,ABCG1,ACSL3,AGT,AGTR1,APOA1,APOA2,APOA4,APOA5,APOB,APOC1,APOC2,APOC3,APOE,APOM,ARF1,BIN1,CETP,DGAT1,LCAT,LIPC,LIPG,LPL,MPO,MTTP,PCDHGA3,PLA2G2A,PLA2G7,PLAGL2,PLTP,SCARB1,SNX9,SOAT1	Human
NCB-CB	_tstat	within each collection	BP: GO biological process	GO_NEGATIVE_REGULATION_OF_CYTOKINE_SECRETION	0.00179695	0.0112159	-0.491023	-1.86796	3	37	BANK1,LILRB1,IL10,SRGN,ANXA4,PTPN22,GBP1,SLAMF1,BTN2A2,TNFRSF9,NLRP3,FOXP3,PML,ANGPT1,ZC3H12A,CX3CL1,TNF,PTGER4,C1QTNF3,LGR4,TNFRSF21	21	0.567568	ANGPT1,ANXA1,ANXA4,APOA1,APOA2,BANK1,BTN2A2,C1QTNF3,CD34,CX3CL1,EZR,F2RL1,FBLN1,FN1,FOXP3,GAS6,GBP1,IL10,IL6,LGR4,LILRB1,NLRP12,NLRP3,NR1H4,PML,PTGER4,PTPN22,RABGEF1,SLAMF1,SRGN,SSC5D,TNF,TNFRSF21,TNFRSF9,TNFSF4,TRIM27,ZC3H12A	Human
NCB-CB	_tstat	within each collection	BP: GO biological process	GO_NEGATIVE_REGULATION_OF_CELL_ACTIVATION	0.000541	0.00530695	-0.378004	-1.86568	0	140	TNFRSF14,NR1H3,HFE,CASP3,IRF1,CD274,IL4R,TNFAIP8L2,BANK1,CYLD,LILRB1,CD74,PDCD1LG2,TNFRSF13B,IL10,MILR1,HAVCR2,NOS3,SAMSN1,CD84,PTPN22,TBC1D10C,CD300A,CNR2,ITCH,LILRB2,BTN2A2,INPP5D,SFTPD,PLA2G2D,LAX1,AXL,IL2RA,SPN,PTGER3,CCR2,LAG3,HLX,HLA-G,BCR,LYN,RHBDD3,FOXP3,TIGIT,HMOX1,IL31RA,CTLA4,JAK3,PTPN6,LST1,SCGB1A1,CYGB,MERTK,LGALS9,FAS,ZC3H12A,PAG1,TNFAIP3,FBXO7,BMP4,PRKG1,SLA2,PRDM1,TNFRSF21,DUSP3,M…	67	0.478571	ABAT,ABR,ADAMTS18,ADRB2,ANXA1,APOE,ATM,AXL,BANK1,BCL6,BCR,BMP4,BTN2A2,C1QTNF1,CASP3,CCR2,CD274,CD276,CD300A,CD74,CD84,CDKN2A,CEACAM1,CEBPB,CLEC4G,CNR1,CNR2,CTLA4,CYGB,CYLD,DLG1,DTX1,DUSP22,DUSP3,ERBB2,F2,FAS,FBXO7,FER,FOXF1,FOXJ1,FOXP3,GAL,GLI3,GLMN,GNRH1,HAVCR2,HFE,HLA-DRB1,HLA-DRB5,HLA-G,HLX,HMGB1,HMOX1,ID2,IDO1,IHH,IL10,IL13RA2,IL20RB,IL2RA,IL31RA,IL4R,INHA,INHBA,INPP5D,IRF1,ITCH,JAK3,LAG3,LAX…	Human
NCB-CB	_tstat	within each collection	BP: GO biological process	GO_MYELOID_LEUKOCYTE_MIGRATION	0.000488	0.00530695	-0.411986	-1.86537	0	84	PTPRO,VAV1,CCL4L2,CCL24,CCL3,FOLR2,C5AR1,NCKAP1L,IL17RA,FCER1G,ITGB2,TNFRSF11A,IL17RC,IL1B,EDNRB,CCR7,SFTPD,CKLF,PIK3CG,CCL8,CSF3R,DAPK2,XCL2,CCL4,IL6R,CCL21,IRAK4,CCL7,CCL5,CCL23,S100A9,STAT5B,CX3CL1,MITF,CCL13,CCL18,TNFSF11,CCL19,TREM1,IFNG,HRH1,CX3CR1,PDE4B,PIK3CD,PDE4D,SCG2,ARHGEF5,CCL14,S100A8,XCL1	50	0.595238	ANXA1,ARHGEF5,C5AR1,CCL11,CCL13,CCL14,CCL15,CCL16,CCL18,CCL19,CCL2,CCL20,CCL21,CCL22,CCL23,CCL24,CCL3,CCL4,CCL4L2,CCL5,CCL7,CCL8,CCR7,CHGA,CKLF,CSF3R,CX3CL1,CX3CR1,CXADR,CXCL3,CXCR2,DAPK2,EDN1,EDN2,EDN3,EDNRB,FCER1G,FLT1,FOLR2,GBF1,HRH1,IFNG,IL17RA,IL17RC,IL1B,IL6,IL6R,IRAK4,ITGA1,ITGA9,ITGB2,JAGN1,KIT,LGALS3,MITF,NCKAP1L,NUP85,PDE4B,PDE4D,PDGFB,PIK3CD,PIK3CG,PIP5K1C,PPBP,PREX1,PTPRO,RAC1,RPS19,S…	Human
NCB-CB	_tstat	within each collection	BP: GO biological process	GO_LEUKOCYTE_MIGRATION	0.000605	0.00532127	-0.351772	-1.86308	0	229	PTPRO,SLC7A7,VAV1,CCR1,GOLPH3,SELL,CD74,CCL4L2,CCL24,CCL3,CD58,IL10,SBDS,DOK2,TBX21,FOLR2,C5AR1,NCKAP1L,SIRPG,IL17RA,FCER1G,ZAP70,ITGAM,CD84,DOCK8,MYO1G,ITGB2,ITGAL,LCK,SLC16A1,ITGA4,TNFRSF11A,ANO6,CXCL11,SELP,IL17RC,IL1B,SELPLG,INPP5D,EDNRB,CCR7,SFTPD,CKLF,CCR5,SIRPA,CD48,VCAM1,HCK,PIK3CG,CCL8,CORO1A,SPN,CSF3R,DAPK2,XCL2,IL16,CCR2,CCL4,IL6R,ITGAX,LYST,CCL21,ITGB7,LYN,IRAK4,CAV1,CCL7,ADAM8,S1PR1,…	97	0.423581	ADAM8,AIMP1,ANGPT1,ANGPT2,ANO6,ANXA1,APOB,ARHGEF5,ARTN,ATP1B1,ATP1B2,ATP1B3,B4GALT1,BSG,C5AR1,CAV1,CCL11,CCL13,CCL14,CCL15,CCL16,CCL18,CCL19,CCL2,CCL20,CCL21,CCL22,CCL23,CCL24,CCL3,CCL4,CCL4L2,CCL5,CCL7,CCL8,CCR1,CCR2,CCR5,CCR6,CCR7,CD177,CD2,CD244,CD34,CD44,CD47,CD48,CD58,CD74,CD84,CDC42,CEACAM1,CEACAM6,CHGA,CKLF,COL1A1,COL1A2,CORO1A,CSF3R,CX3CL1,CX3CR1,CXADR,CXCL10,CXCL11,CXCL13,CXCL16,CXCL3,CX…	Human
NCB-CB	_tstat	within each collection	BP: GO biological process	GO_REGULATION_OF_MEMBRANE_PROTEIN_ECTODOMAIN_PROTEOLYSIS	0.00352734	0.0186396	-0.581789	-1.86224	7	19	SNX9,IL10,SNX33,TNFRSF1B,IL1B,TIMP1,ADAM8,TNF,IFNG,APOE,ADRA2A,FURIN,GPLD1,SH3D19	14	0.736842	ADAM8,ADAM9,ADRA2A,APOE,FURIN,GPLD1,IFNG,IL10,IL1B,PACSIN3,PTPN3,SH3D19,SNX33,SNX9,TIMP1,TIMP2,TIMP3,TNF,TNFRSF1B	Human
NCB-CB	_tstat	within each collection	BP: GO biological process	GO_PYRIDINE_CONTAINING_COMPOUND_BIOSYNTHETIC_PROCESS	0.00437828	0.022124	-0.590157	-1.86156	9	18	ME1,QPRT,NADK,NMNAT1,NMNAT2,PNPO,KYNU,KMO,NAMPT,PDXK	10	0.555556	ACMSD,AFMID,ASPDH,HAAO,KMO,KYNU,ME1,NADK,NADSYN1,NAMPT,NMNAT1,NMNAT2,NMNAT3,PDXK,PNP,PNPO,PSAT1,QPRT	Human
NCB-CB	_tstat	within each collection	BP: GO biological process	GO_NEGATIVE_REGULATION_OF_LYMPHOCYTE_MEDIATED_IMMUNITY	0.00135379	0.00908332	-0.50925	-1.86142	2	32	HFE,HLA-E,LILRB1,TAP1,HLA-A,HLA-B,HAVCR2,SERPINB9,SLAMF1,PTPRC,CR1,SPN,FOXP3,ARRB2,PTPN6,LGALS9	16	0.5	ARRB2,BCL6,C4BPA,C4BPB,CEACAM1,CLEC4G,CR1,DUSP22,FOXJ1,FOXP3,HAVCR2,HFE,HLA-A,HLA-B,HLA-E,IGF2,IL20RB,IL7R,LGALS9,LILRB1,MICA,NDFIP1,PPP3CB,PTPN6,PTPRC,SERPINB9,SLAMF1,SPN,SUSD4,TAP1,THOC1,XCL1	Human
NCB-CB	_tstat	within each collection	BP: GO biological process	GO_NEGATIVE_REGULATION_OF_VIRAL_GENOME_REPLICATION	0.00046	0.00530695	-0.466688	-1.86119	0	45	APOBEC3D,APOBEC3G,PARP10,ZC3HAV1,OAS1,TNIP1,FAM111A,BST2,C19orf66,APOBEC3F,MX1,IFITM1,OAS3,EIF2AK2,APOBEC3C,IFIT1,ISG20,PLSCR1,CCL5,RNASEL,EIF2AK4,RSAD2,IFI16,ISG15,ZC3H12A,TNF,IFITM2,OASL	28	0.622222	ADAR,APOBEC3A,APOBEC3C,APOBEC3D,APOBEC3F,APOBEC3G,BST2,BTBD17,C19orf66,CCL5,CCNK,EIF2AK2,EIF2AK4,FAM111A,HMGA2,IFI16,IFIT1,IFITM1,IFITM2,IFITM3,ILF3,INPP5K,ISG15,ISG20,LTF,MAVS,MX1,OAS1,OAS3,OASL,PARP10,PLSCR1,PROX1,RNASEL,RSAD2,SLPI,SRPK1,SRPK2,TNF,TNIP1,TRIM6,VAPA,VAPB,ZC3H12A,ZC3HAV1	Human
NCB-CB	_tstat	within each collection	BP: GO biological process	GO_ANTIGEN_PROCESSING_AND_PRESENTATION_OF_PEPTIDE_ANTIGEN	0.000564	0.00532009	-0.366873	-1.86117	0	167	B2M,PSMB8,HLA-DOA,PSMB9,RILP,CTSE,PSME1,ACE,HLA-DOB,HFE,PSMB10,TAP2,HLA-E,TAPBP,HLA-DMA,CD74,HLA-F,CYBB,PSMA4,TAP1,HLA-A,CTSF,HLA-C,HLA-B,HLA-DPA1,HLA-DRA,PDIA3,SEC24A,FCER1G,CD209,CTSS,SEC24B,ERAP1,DYNC1I1,PSMA5,MARCH1,AP2A2,SAR1B,AP1S2,NCF1,HLA-DMB,HLA-DPB1,NCF4,MARCH8,AP1S1,FCGR1B,FCGR1A,HLA-G,CD36,ABCB1,PSME2,SEC24C,ERAP2,PSMC2,ACTR1B,AP1B1,CLEC4M,PSMB2,DYNLL2,DCTN4,CYBA,ABCB4,HLA-DQA2,SEC24D	64	0.383234	ABCB1,ABCB4,ABCB5,ABCB9,ACE,ACTR1A,ACTR1B,AP1B1,AP1G1,AP1M1,AP1M2,AP1S1,AP1S2,AP1S3,AP2A1,AP2A2,AP2B1,AP2M1,AP2S1,ARF1,AZGP1,B2M,BCAP31,CALR,CANX,CD207,CD209,CD36,CD74,CENPE,CLEC4M,CLTA,CLTC,CTSD,CTSE,CTSF,CTSS,CYBA,CYBB,DCTN1,DCTN2,DCTN3,DCTN4,DCTN5,DCTN6,DNM2,DYNC1H1,DYNC1I1,DYNC1I2,DYNC1LI2,DYNC2H1,DYNC2LI1,DYNLL1,DYNLL2,ERAP1,ERAP2,FCER1G,FCGR1A,FCGR1B,HFE,HLA-A,HLA-B,HLA-C,HLA-DMA,HLA-DMB,HL…	Human
NCB-CB	_tstat	within each collection	BP: GO biological process	GO_CELLULAR_RESPONSE_TO_GROWTH_HORMONE_STIMULUS	0.00474957	0.0236673	-0.620427	-1.85919	10	15	STAT5A,SOCS2,JAK2,MAPK3,MAPK1,LYN,PXN,JAK3,PIK3R1,STAT5B,PTK2,GHR	12	0.8	GHR,JAK2,JAK3,LYN,MAPK1,MAPK3,PIK3R1,PRLR,PTK2,PTPN1,PXN,SOCS2,STAT3,STAT5A,STAT5B	Human
NCB-CB	_tstat	within each collection	BP: GO biological process	GO_PHAGOCYTOSIS	0.000567	0.00532009	-0.362979	-1.85693	0	176	NR1H3,VAV1,IGLV7-43,IGHV2-70,CYFIP1,IGKV1D-33,ELMO1,IGKV3D-20,NCKAP1L,AIF1,MEGF10,IGKV3D-11,BIN2,VAMP7,IRF8,IGLL5,FCER1G,WAS,TRDC,CDC42SE2,MYO1G,FGR,FCGR3A,CD247,MYH2,FCN1,ADORA2A,IGLC1,ABCA1,IGKV1-5,SLAMF1,IGHG1,RAB20,CD14,P2RX7,MAPK3,IGHG4,HCK,AXL,CORO1A,ARPC1A,IGLC3,SYT7,IGKV4-1,UNC13D,FCGR1A,IGKC,MARCO,CD36,MAPK1,LYN,IGLC2,WIPF3,RAB14,CLEC7A,TGM2,PEAR1,CORO1C,WASL,MYO7A,ACTR2,PIK3R1,WIPF1,XKR…	68	0.386364	ABCA1,ABCA7,ABI1,ABL1,ACTB,ACTG1,ACTR2,ACTR3,ADORA1,ADORA2A,AIF1,ANXA1,ANXA11,ANXA3,ARPC1A,ARPC1B,ARPC2,ARPC3,ARPC4,ARPC5,AXL,BAIAP2,BECN1,BIN2,BRK1,C4B,CD14,CD247,CD302,CD36,CD3G,CD47,CD93,CDC42,CDC42SE1,CDC42SE2,CDC7,CLEC7A,COLEC12,CORO1A,CORO1C,CRK,CRP,CSNK1A1,CYFIP1,CYFIP2,DOCK1,EIF2AK1,ELMO1,ELMO2,ELMO3,FCER1G,FCGR1A,FCGR2A,FCGR3A,FCN1,FCN2,FCN3,FGR,FYN,GAS6,GATA2,GRB2,GSN,GULP1,HCK,HMGB1,HS…	Human
NCB-CB	_tstat	within each collection	BP: GO biological process	GO_NEGATIVE_REGULATION_OF_I_KAPPAB_KINASE_NF_KAPPAB_SIGNALING	0.000921	0.00659131	-0.463275	-1.85645	1	46	CASP8,CYLD,TNIP1,NLRX1,IL10,PPM1B,FBXW11,TNIP3,NLRP6,CCDC22,RIPK1,NLRC3,NFKBIB,NLRP3,PYCARD,RHOH,NFKBIA,DNAJA3,OPTN,ZC3H12A,TNFAIP3	21	0.456522	ABL1,ADIPOQ,ASH1L,BMP7,C1QTNF3,CARD8,CASP8,CCDC22,CYLD,DAB2IP,DNAJA3,ESR1,FAF1,FBXW11,G3BP2,GSTP1,IL10,IL1RL1,LITAF,NFKBIA,NFKBIB,NLRC3,NLRP12,NLRP3,NLRP6,NLRX1,NR1H4,OPTN,OTUD7A,OTUD7B,PPM1A,PPM1B,PSMD10,PYCARD,RHOH,RIPK1,RORA,SIRT1,STAT1,TLE1,TNFAIP3,TNIP1,TNIP3,TRIM59,ZC3H12A,ZMYND11	Human
NCB-CB	_tstat	within each collection	BP: GO biological process	GO_REGULATION_OF_LEUKOCYTE_MIGRATION	0.000533	0.00530695	-0.377691	-1.85594	0	134	TNFRSF14,GPSM3,MPP1,CCR1,C3AR1,CD74,VEGFC,CCL24,CCL3,STK10,STAP1,CSF1,C5AR1,NCKAP1L,AIF1,TIRAP,CMKLR1,IL33,ADA,ITGA4,RAC2,ANO6,CD300A,CXCL11,SELP,KLRK1,RIPK3,IL1B,CCR7,P2RY12,ADAM10,CCL8,DAPK2,PTGER3,PTAFR,CCR2,THBS4,CCL4,BCR,IL6R,CCL21,LYN,PYCARD,CCL7,TNFRSF18,ADAM8,TNFSF14,CXCL9,WASL,HMOX1,CCL5,TACR1,KLRC4-KLRK1,CXCL13,LGALS9,IL23A,PTK2B,CX3CL1,RARRES2,TNF,PTGER4,CXCR3,CCL19,CXCL10	64	0.477612	ABR,ADA,ADAM10,ADAM17,ADAM8,ADORA1,AIF1,ANO6,ANXA1,APOD,BCR,BMP5,C1QBP,C3AR1,C5,C5AR1,CALR,CAMK1D,CCL19,CCL2,CCL20,CCL21,CCL24,CCL28,CCL3,CCL4,CCL5,CCL7,CCL8,CCR1,CCR2,CCR6,CCR7,CD300A,CD74,CMKLR1,CREB3,CSF1,CX3CL1,CXCL1,CXCL10,CXCL11,CXCL12,CXCL13,CXCL14,CXCL2,CXCL3,CXCL5,CXCL6,CXCL9,CXCR3,DAPK2,ECM1,EDN2,EDN3,EDNRA,F2RL1,F7,FADD,GAS6,GPSM3,GREM1,HMGB1,HMOX1,HOXA7,ICAM1,IL12A,IL1B,IL23A,IL33,IL6…	Human
NCB-CB	_tstat	within each collection	BP: GO biological process	GO_MYELOID_DENDRITIC_CELL_ACTIVATION	0.00355398	0.0187497	-0.566299	-1.85435	7	21	BATF2,BATF3,CD86,BATF,DOCK2,SPI1,SLAMF1,LTBR,IRF4,PYCARD,UBD,CD244,RELB,TGFBR2,TNFSF9	15	0.714286	BATF,BATF2,BATF3,CAMK4,CD244,CD86,DHRS2,DOCK2,HMGB1,IRF4,LTBR,PSEN1,PYCARD,RBPJ,RELB,SLAMF1,SPI1,TGFBR2,TNFSF9,TRAF6,UBD	Human
NCB-CB	_tstat	within each collection	BP: GO biological process	GO_FC_GAMMA_RECEPTOR_SIGNALING_PATHWAY	0.000499	0.00530695	-0.403863	-1.85397	0	91	VAV1,IGLV7-43,IGHV2-70,CYFIP1,IGKV1D-33,ELMO1,IGKV3D-20,NCKAP1L,IGKV3D-11,FCER1G,WAS,MYO1G,FGR,FCGR3A,CD247,MYH2,IGLC1,IGKV1-5,IGHG1,MAPK3,IGHG4,HCK,ARPC1A,IGLC3,IGKV4-1,FCGR1A,IGKC,MAPK1,LYN,IGLC2,WIPF3,WASL,FCGRT,ACTR2,PIK3R1,WIPF1,IGHV3-23,FCGR2A,NCKIPSD,IGHG2,PIK3CB,CLEC4E,IGKV3-20,CD3G,IGHG3,PTK2	46	0.505495	ABI1,ABL1,ACTB,ACTG1,ACTR2,ACTR3,ARPC1A,ARPC1B,ARPC2,ARPC3,ARPC4,ARPC5,BAIAP2,BRK1,CD247,CD3G,CDC42,CLEC4E,CRK,CYFIP1,CYFIP2,DOCK1,ELMO1,ELMO2,FCER1G,FCGR1A,FCGR2A,FCGR3A,FCGRT,FGR,FYN,GRB2,HCK,HSP90AA1,HSP90AB1,IGHG1,IGHG2,IGHG3,IGHG4,IGHV2-70,IGHV3-23,IGKC,IGKV1-5,IGKV1D-33,IGKV2-40,IGKV3-20,IGKV3D-11,IGKV3D-20,IGKV4-1,IGLC1,IGLC2,IGLC3,IGLC7,IGLV7-43,LIMK1,LYN,MAPK1,MAPK3,MYH2,MYO10,MYO1C,MYO1…	Human
NCB-CB	_tstat	within each collection	BP: GO biological process	GO_REGULATION_OF_LYMPHOCYTE_MIGRATION	0.00134771	0.00906131	-0.494687	-1.8533	2	35	TNFRSF14,CCL3,STK10,AIF1,ITGA4,KLRK1,RIPK3,ADAM10,CCR2,CCL4,CCL21,PYCARD,CCL7,ADAM8,TNFSF14,WASL,CCL5,KLRC4-KLRK1,CXCL13,PTK2B,CXCL10,APOD,FADD	23	0.657143	ADAM10,ADAM17,ADAM8,AIF1,APOD,CCL2,CCL20,CCL21,CCL3,CCL4,CCL5,CCL7,CCR2,CXCL10,CXCL12,CXCL13,CXCL14,ECM1,FADD,ITGA4,KLRC4-KLRK1,KLRK1,MSN,PADI2,PTK2B,PYCARD,RIPK3,S100A7,STK10,TMEM102,TNFRSF14,TNFSF14,WASL,WNT5A,XCL1	Human
NCB-CB	_tstat	within each collection	BP: GO biological process	GO_POSITIVE_REGULATION_OF_NEUTROPHIL_MIGRATION	0.00265957	0.0151427	-0.531686	-1.85328	5	26	C3AR1,CD74,C5AR1,NCKAP1L,TIRAP,RAC2,IL1B,CCR7,DAPK2,PTGER3,THBS4,CCL21,ADAM8,IL23A,PTGER4,CCL19	16	0.615385	ADAM8,C1QBP,C3AR1,C5AR1,CAMK1D,CCL19,CCL21,CCR7,CD74,CXCL1,CXCL2,CXCL3,DAPK2,EDNRA,IL1B,IL23A,LBP,NCKAP1L,PAWR,PTGER3,PTGER4,RAC1,RAC2,THBS4,TIRAP,XCL1	Human
NCB-CB	_tstat	within each collection	BP: GO biological process	GO_REGULATION_OF_HEMOPOIESIS	0.000614	0.00532127	-0.341854	-1.84616	0	263	HLA-DOA,GABPA,ATP11C,ACE,TRIB1,TMEM64,FES,CASP8,IL1RL2,IRF1,FLT3LG,CCR1,IL4R,CYLD,LILRB1,CD74,CD28,BTK,RASGRP1,CCL3,IL15,ESRRA,GPR55,CSF1,CARD11,HLA-B,NCKAP1L,CD86,NKAP,ZAP70,WDR61,FNIP1,MAPK14,CSF1R,ADA,MIXL1,EIF2AK2,TLR4,SASH3,NFAM1,ETS1,SIGLEC15,CD80,IL12RB1,RIPK2,SLC9B2,SPI1,SOX13,C1QC,RAG1,MEF2C,LILRB2,IL1B,LILRB4,PPP2R3C,INPP5D,XBP1,RIPK1,CD27,SMAP1,TYROBP,TFE3,BAD,OGT,IL7,CIB1,AXL,IL2RA,CS…	114	0.43346	ACE,ACIN1,ACVR1B,ACVR2A,ADA,ADAM8,ADIPOQ,AGER,ANKRD54,ANXA1,AP3B1,AP3D1,APCS,ARNT,ATP11C,ATP6AP1,ATXN1L,AXL,BAD,BCL6,BGLAP,BMP4,BTK,C1QC,CA2,CAMK4,CARD11,CASP8,CCL19,CCL3,CCL5,CCR1,CD101,CD2,CD27,CD28,CD46,CD74,CD80,CD83,CD86,CDC73,CDK6,CDKN2A,CEBPB,CIB1,CLPTM1,CREB1,CSF1,CSF1R,CSF3R,CTLA4,CTNNB1,CTNNBIP1,CTR9,CUL4A,CYLD,CYP26B1,DLL1,DTX1,EGR3,EIF2AK2,ERBB2,ESRRA,ETS1,FADD,FAS,FBXO7,FES,FLCN,FLT3…	Human
NCB-CB	_tstat	within each collection	BP: GO biological process	GO_RESPONSE_TO_HYDROPEROXIDE	0.00518135	0.0253119	-0.615855	-1.84549	11	15	GPX3,AIF1,JAK2,OXR1,TP53INP1,CD36,CD38,CCL5,STX4	9	0.6	AIF1,APOA4,CCL5,CD36,CD38,CHUK,GPX1,GPX3,JAK2,MGST1,OXR1,PRKCD,STX2,STX4,TP53INP1	Human
NCB-CB	_tstat	within each collection	BP: GO biological process	GO_REGULATION_OF_BONE_REMODELING	0.00134168	0.00906131	-0.500199	-1.84473	2	33	TMEM64,IL20RA,CSF1R,CSK,SIGLEC15,INPP5D,TNFRSF11B,P2RX7,SYT7,ADAM8,CD38,S1PR1,PDK4,ITGB3,PPARGC1B,TNFAIP3,PTGER4,TNFSF11	18	0.545455	ADAM8,ATP6AP1,BGLAP,CA2,CD38,CSF1R,CSK,GJA1,GREM1,IL20RA,INPP5D,ITGB3,LEPR,LRP5,MC4R,NF1,P2RX7,PDK4,PPARGC1B,PTGER4,S1PR1,SFRP1,SIGLEC15,SPP1,SRC,SYK,SYT7,TFRC,TMEM64,TNFAIP3,TNFRSF11B,TNFSF11,UBASH3B	Human
NCB-CB	_tstat	within each collection	BP: GO biological process	GO_REGULATION_OF_CYTOKINE_PRODUCTION_INVOLVED_IN_IMMUNE_RESPONSE	0.000943	0.0067318	-0.45375	-1.84385	1	50	B2M,TNFRSF14,HFE,LILRB1,CD74,BTK,BST2,HLA-A,IL10,FCER1G,TLR4,SASH3,SLAMF1,CD36,NLRP3,FOXP3,HMOX1,FZD5,JAK3,TLR3,RSAD2,ANGPT1,TNF,GPRC5B	24	0.48	ANGPT1,APOA1,APOA2,ATG5,B2M,BCL10,BCL6,BST2,BTK,CD36,CD74,CUEDC2,F2RL1,FCER1G,FOXP3,FZD5,GATA3,GPRC5B,HFE,HLA-A,HMOX1,IL10,IRAK3,JAK3,LILRB1,MALT1,MAP3K7,MIF,NLRP3,NR4A3,PRKCZ,RSAD2,SASH3,SEMA7A,SLAMF1,SPON2,TGFB2,TGFB3,TLR3,TLR4,TNF,TNFRSF14,TNFSF4,TRAF2,TRAF6,TRIL,TRIM6,TRPM4,WNT5A,XCL1	Human
NCB-CB	_tstat	within each collection	BP: GO biological process	GO_POSITIVE_REGULATION_OF_ERK1_AND_ERK2_CASCADE	0.000545	0.00530695	-0.372077	-1.8354	0	141	NTRK1,CAMK2D,ARRB1,CCR1,CD74,CCL4L2,CCL24,RASGRP1,CCL3,GPR55,C5AR1,HAVCR2,TIRAP,RAP1A,CYSLTR2,CSF1R,PTPN22,TLR4,NOD2,TNFRSF11A,HTR2B,RIPK2,GCNT2,SLAMF1,IL1B,CCR7,MAPK3,CIB1,CCL8,XCL2,CCL4,CD36,CCL21,GPR183,PYCARD,CCL7,TNFAIP8L3,CCL5,CCL23,ARRB2,THPO,FLT4,LGALS9,RAPGEF2,ANGPT1,ABCA7,PTK2B,CX3CL1,P2RY1,TNF,DRD2,CCL13,PTEN,CCL18,TNFSF11,CCL19,NRP1,BMP4,PTPN11,FGFR4,TRPV4	61	0.432624	ABCA7,ABL1,ADRA1A,ANGPT1,ARHGAP8,ARRB1,ARRB2,ATP6AP1,BMP2,BMP4,BMPER,BRAF,C3,C5AR1,CAMK2D,CCL11,CCL13,CCL14,CCL15,CCL16,CCL18,CCL19,CCL2,CCL20,CCL21,CCL22,CCL23,CCL24,CCL3,CCL4,CCL4L2,CCL5,CCL7,CCL8,CCR1,CCR7,CD36,CD44,CD74,CHI3L1,CIB1,CSF1R,CX3CL1,CYSLTR2,DNAJC27,DRD2,DSTYK,EDNRA,EGFR,EPO,EPOR,ERBB4,ESR1,ESR2,F2R,F2RL1,FBXW7,FGA,FGB,FGF1,FGF10,FGF18,FGF19,FGF2,FGFR2,FGFR3,FGFR4,FGG,FLT4,GAS6,GCN…	Human
NCB-CB	_tstat	within each collection	BP: GO biological process	GO_POSITIVE_REGULATION_OF_LEUKOCYTE_DEGRANULATION	0.00568679	0.027327	-0.600472	-1.83244	12	16	IL4R,VAMP8,VAMP7,FCER1G,ZAP70,FGR,PTAFR,LAMP1,STX4,GAB2,AP1G1	11	0.6875	ADORA2B,AP1G1,F2RL1,FCER1A,FCER1G,FGR,GAB2,IL4R,LAMP1,PTAFR,SNX4,STX4,SYK,VAMP7,VAMP8,ZAP70	Human
NCB-CB	_tstat	within each collection	BP: GO biological process	GO_COFACTOR_BIOSYNTHETIC_PROCESS	0.00054	0.00530695	-0.369371	-1.83187	0	144	COQ2,ME1,SPR,PPCS,MAT2B,PCBD1,ACOT4,QPRT,DLD,PPT2,NFU1,NADK,NMNAT1,PPCDC,MOCS2,ACSS2,ACSL5,NMNAT2,ACOT9,PCBD2,COQ7,MOCS1,THEM4,HSD17B12,RSAD1,DHFR,PANK1,PNPO,HSCB,KYNU,GCH1,SDHAF1,TMEM14C,TPK1,FXN,MOCOS,COASY,ISCU,RFK,ACOT2,QDPR,SLC25A1,MTHFS,PDHA1,ACOT1,ACSL3,BDH2,NFE2L1,KMO,SLC25A16,LIAS,ACSL4,NUBP1,MLYCD,SLC25A39,ACOT13,NAMPT,PDXK	58	0.402778	ABCB6,ACACA,ACACB,ACLY,ACOT1,ACOT11,ACOT12,ACOT13,ACOT2,ACOT4,ACOT7,ACOT8,ACOT9,ACSF2,ACSF3,ACSL1,ACSL3,ACSL4,ACSL5,ACSL6,ACSS1,ACSS2,AFMID,AGK,ALAD,ALAS1,ALAS2,ASPDH,ATIC,BDH2,CIAO1,CIAPIN1,COASY,COQ2,COQ3,COQ4,COQ5,COQ6,COQ7,COQ9,COX10,COX15,CPOX,DCAKD,DHFR,DLAT,DLD,ELOVL1,ELOVL2,ELOVL3,ELOVL5,ELOVL6,ELOVL7,FASN,FECH,FLAD1,FPGS,FXN,GART,GCDH,GCH1,GPHN,HAAO,HMBS,HSCB,HSD17B12,IBA57,ISCA1,ISCA2,I…	Human
NCB-CB	_tstat	within each collection	BP: GO biological process	GO_REGULATION_OF_ION_HOMEOSTASIS	0.000564	0.00532009	-0.360831	-1.83052	0	167	NPR1,B2M,IBTK,SLC30A5,SCN1B,SLC30A4,CAMK2D,P2RX5,CCL3,COMT,GCLM,P2RX4,CD4,GSTO1,LCK,FCRL5,CAPN3,HTR2B,LRRK2,CLIC2,CXCL11,JPH3,CASQ1,FHL1,MYO5A,PTPRC,PPP2R3C,EDNRB,CCR7,P2RX7,CCR5,CALM3,P2RX3,CORO1A,SLC30A3,RYR1,GSTM2,CCL21,LYN,AP3D1,AKAP5,CAV1,JSRP1,TRDN,CXCL9,TACR1,PTPN6,BAK1,PML,AVPR1A,CYBA,GJA5,BBC3,NOS1,PRKACA,GCLC,PTK2B,SLC8A1,RASA3,PTGER4,DRD2,CXCR3,HSH2D,CCL19,CXCL10,IFI6	66	0.39521	ABL1,ADCYAP1R1,ADORA1,AGT,AGTR1,AGTR2,AKAP5,AKAP6,ANK2,ANK3,ANPEP,AP3D1,ASPH,ATG5,ATP1A2,AVPR1A,AVPR2,B2M,BAK1,BAX,BBC3,BCL2,BMP4,CA2,CACNA1C,CACNA1G,CALM1,CALM2,CALM3,CAMK2D,CAPN3,CASQ1,CASQ2,CAV1,CCL19,CCL21,CCL3,CCR5,CCR7,CD4,CHERP,CLIC2,COMT,CORIN,CORO1A,CXCL10,CXCL11,CXCL9,CXCR3,CYBA,DCN,DDIT3,DIAPH1,DMD,DRD1,DRD2,EDN1,EDNRA,EDNRB,EPO,F2,F2R,F2RL3,FCRL5,FGF12,FGF2,FHL1,FKBP1A,FKBP1B,GCLC,GCL…	Human
NCB-CB	_tstat	within each collection	BP: GO biological process	GO_MYELOID_LEUKOCYTE_DIFFERENTIATION	0.000491	0.00530695	-0.403135	-1.82792	0	85	CASP10,BATF2,CASP8,SNX10,PIR,LRRK1,CSF1,ACP5,HHEX,BATF3,CD86,NKAP,BATF,MAPK14,CSF1R,TNFRSF11A,GAB3,SPI1,MEF2C,CBFA2T3,CCR7,LTBR,PPARG,IRF4,IL31RA,UBD,IFI16,LGALS9,GAB2,RELB,TNF,TAL1,TNFSF11,CCL19,TGFBR2,BMP4,PDE2A,TNFSF9,CD109	39	0.458824	ACP5,ANXA2,BATF,BATF2,BATF3,BMP4,CAMK4,CASP10,CASP8,CBFA2T3,CCL19,CCR7,CD109,CD86,CDC42,CEBPA,CSF1,CSF1R,CTNNB1,DHRS2,EFNA2,EIF2AK1,EPHA2,F2RL1,FAM20C,FARP2,FOXP1,GAB2,GAB3,GATA2,GATA3,GLO1,GPC3,HHEX,IFI16,IL31RA,IRF4,JAGN1,JUN,JUNB,KDM1A,KIT,L3MBTL3,LEF1,LGALS9,LRRK1,LTBR,MAPK14,MED1,MEF2C,MMP9,MT1G,MYH9,NKAP,OSTM1,PAFAH1B1,PARP1,PDE1B,PDE2A,PIK3CD,PIR,PPARG,PSEN1,RBPJ,RELB,SBNO2,SH3PXD2A,SIRT1,…	Human
NCB-CB	_tstat	within each collection	BP: GO biological process	GO_ENERGY_DERIVATION_BY_OXIDATION_OF_ORGANIC_COMPOUNDS	0.000584	0.00532009	-0.350375	-1.8277	0	200	IDH3A,SDHD,NDUFAF1,SDHA,COX5A,TAZ,FASTKD3,UQCR11,NDUFS7,NDUFA1,NDUFV3,ALDH5A1,SUCLG1,UQCRB,DLD,ETFA,PYGL,CYC1,COX6C,COX7A2L,NR1D1,ME3,MDH1,MTFR1,UQCR10,SCO2,PHKB,COX6B1,NDUFAB1,PPP1R3C,SUCLG2,UQCRFS1,CALM3,PGM2,PHKA1,SDHB,UQCRC2,NDUFB11,KL,UQCRQ,NDUFA6,PINK1,NDUFA10,GYG2,NDUFS6,NDUFB10,PYGM,FXN,NDUFS4,NDUFS1,COX4I1,GYG1,NDUFB3,PHKG2,PDHA1,NDUFA2,STBD1,AGL,IDH1,IDH3G,GPD1,UGP2,FH,UQCRC1,NDUFV1,NDU…	86	0.43	ACADVL,ACO1,ACO2,ACSM1,AGL,AKT1,AKT2,ALDH5A1,BAX,BLOC1S1,CALM1,CALM2,CALM3,CAT,CHCHD5,COQ9,COX10,COX15,COX19,COX4I1,COX5A,COX5B,COX6A1,COX6B1,COX6C,COX7A2L,COX7B,COX7C,COX8A,CPS1,CS,CYC1,CYCS,CYP1A2,DHTKD1,DLAT,DLD,DLST,EPM2A,ETFA,ETFB,ETFDH,FASTKD1,FASTKD2,FASTKD3,FASTKD5,FH,FXN,G6PC,GAA,GBE1,GCK,GFPT1,GFPT2,GNAS,GNMT,GPD1,GSK3A,GSK3B,GYG1,GYG2,GYS1,GYS2,IDH1,IDH2,IDH3A,IDH3B,IDH3G,IL6ST,IMMP2L,…	Human
NCB-CB	_tstat	within each collection	BP: GO biological process	GO_POSITIVE_REGULATION_OF_MYELOID_LEUKOCYTE_MEDIATED_IMMUNITY	0.00612423	0.0289982	-0.598672	-1.82695	13	16	IL4R,VAMP8,STAP1,VAMP7,FCER1G,ZAP70,FGR,PTAFR,STX4,GAB2	10	0.625	ADORA2B,C3,F2RL1,FCER1A,FCER1G,FGR,GAB2,IL4R,PTAFR,SNX4,STAP1,STX4,SYK,VAMP7,VAMP8,ZAP70	Human
NCB-CB	_tstat	within each collection	BP: GO biological process	GO_POSITIVE_REGULATION_OF_IMMUNOGLOBULIN_PRODUCTION	0.00402504	0.0207277	-0.53007	-1.82145	8	25	CD40,HLA-E,IL4R,CD28,TBX21,IL33,SASH3,XBP1,TNFRSF4,MZB1,STAT6,STX4,IFNG,PAXIP1,VAMP3,TNFSF13,XCL1	17	0.68	CD28,CD40,CLCF1,EXOSC3,HLA-E,HPX,IFNG,IL33,IL4R,IL6,MSH6,MZB1,PAXIP1,RBP4,SASH3,STAT6,STX4,TBX21,TNFRSF4,TNFSF13,TNFSF4,UNG,VAMP3,XBP1,XCL1	Human
NCB-CB	_tstat	within each collection	BP: GO biological process	GO_POSITIVE_REGULATION_OF_INTERLEUKIN_6_PRODUCTION	0.000479	0.00530695	-0.43365	-1.81949	0	58	IL1RL2,TLR1,TICAM2,MYD88,TLR6,FCER1G,TIRAP,IL33,TLR4,NOD2,RIPK2,IL17RC,TLR2,LILRB2,IL1B,XBP1,P2RX7,PTAFR,CCR2,IL6R,CD36,TLR7,PYCARD,TLR3,LGALS9,CYBA,TNF,IFNG,CARD9,TRPV4,TNFSF9	31	0.534483	ADORA2B,AKIRIN2,ARHGEF2,CARD9,CCR2,CD36,CYBA,DDX58,EREG,F2R,F2RL1,FCER1G,HMGB1,HSPD1,HYAL2,IFNG,IL17RC,IL1B,IL1RL2,IL33,IL6,IL6R,LBP,LGALS9,LILRB2,MAPK13,MYD88,NCL,NOD1,NOD2,P2RX7,PAEP,PTAFR,PYCARD,RAB7B,RIPK2,SPON2,TBC1D23,TICAM1,TICAM2,TIRAP,TLR1,TLR2,TLR3,TLR4,TLR6,TLR7,TLR9,TNF,TNFSF4,TNFSF9,TRAF6,TRPV4,TWIST1,UCN,WNT5A,XBP1,ZBTB20	Human
NCB-CB	_tstat	within each collection	BP: GO biological process	GO_POLYSACCHARIDE_CATABOLIC_PROCESS	0.00360523	0.0189582	-0.542005	-1.8193	7	23	PYGL,PHKB,MGAM,CALM3,PGM2,PHKA1,GYG2,PYGM,GYG1,PHKG2,STBD1,AGL,PGM1,PHKA2,GAA	15	0.652174	AGL,CALM1,CALM2,CALM3,CHIT1,CPS1,G6PC,GAA,GYG1,GYG2,MGAM,PFKM,PGM1,PGM2,PHKA1,PHKA2,PHKB,PHKG1,PHKG2,PYGB,PYGL,PYGM,STBD1	Human
NCB-CB	_tstat	within each collection	BP: GO biological process	GO_POSITIVE_REGULATION_OF_CELL_ADHESION	0.000657	0.00539653	-0.327971	-1.81625	0	337	TNFRSF14,VAV1,PRKCQ,HLA-E,IL1RL2,CCDC88B,CD274,PRR5,IL4R,EGFLAM,LILRB1,CD74,VEGFC,CD28,RASGRP1,TRAC,PDCD1LG2,IL15,HLA-A,CSF1,CARD11,HLA-DPA1,HLA-DRA,SMAD3,APBB1IP,NCKAP1L,CD86,AIF1,NKAP,HAVCR2,SIRPG,CD4,ZAP70,MAP3K14,CSK,CD3D,ADA,SKAP1,CD247,LIMS1,LCK,SASH3,NOD2,ITGA4,ETS1,CD80,IL12RB1,RIPK2,HLA-DMB,SELP,JAK2,HLA-DPB1,HSD17B12,GCNT2,KLRK1,RAG1,LILRB2,SLAMF1,IL1B,PTPRC,XBP1,RASAL3,CCR7,IL18,BTLA,D…	140	0.41543	ABI3BP,ADA,ADAM8,ADAM9,ADK,AGER,AGR2,AIF1,AKT1,ANGPT1,ANK3,ANXA1,AP3B1,AP3D1,APBB1IP,APOA1,ARHGEF7,ARL2,ARPC2,BAD,BAG4,BCL10,BMP7,BRAF,BTLA,C1QBP,CALR,CARD11,CAV1,CCDC80,CCDC88B,CCL19,CCL2,CCL21,CCL28,CCL5,CCR2,CCR7,CD1D,CD24,CD244,CD247,CD274,CD276,CD28,CD36,CD3D,CD3E,CD3G,CD4,CD40LG,CD44,CD46,CD47,CD5,CD55,CD59,CD6,CD63,CD74,CD80,CD83,CD86,CDC42,CDH13,CDK6,CHRD,CIB1,CITED2,COL16A1,COL8A1,CORO1A…	Human
NCB-CB	_tstat	within each collection	BP: GO biological process	GO_I_KAPPAB_KINASE_NF_KAPPAB_SIGNALING	0.000968	0.00689579	-0.417407	-1.81336	1	69	NFKB1,TICAM2,BIRC3,BTK,IRAK2,TRADD,LY96,MAP3K14,PRDX4,TLR4,RIPK2,RIPK3,TLR2,SHARPIN,TLR8,RIPK1,CD27,BCL3,CD14,NLRC3,NFKBIL1,TAB2,TNFRSF1A,TLR7,TNFSF14,IKBKG	26	0.376812	AVPR2,AZI2,BCL10,BCL3,BIRC2,BIRC3,BTK,CARD9,CD14,CD27,CHUK,DAB2IP,ERC1,IKBKB,IKBKE,IKBKG,IRAK1BP1,IRAK2,LY96,MAP3K14,MAP3K7,NFKB1,NFKB2,NFKBIL1,NKIRAS1,NKIRAS2,NLRC3,NLRP12,PRDX4,RBCK1,REL,RELB,RIPK1,RIPK2,RIPK3,RNF31,ROCK1,ROCK2,RPS27A,SHARPIN,SNIP1,TAB1,TAB2,TAB3,TANK,TBK1,TIAF1,TICAM1,TICAM2,TIFA,TLR2,TLR3,TLR4,TLR7,TLR8,TLR9,TNF,TNFRSF1A,TNFSF14,TNIP2,TRADD,TRAF2,TRAF6,TRIP6,UBA52,UBB,UBC,ZNF…	Human
NCB-CB	_tstat	within each collection	BP: GO biological process	GO_REGULATION_OF_RESPONSE_TO_WOUNDING	0.000678	0.00544918	-0.322887	-1.7997	0	358	NFKB1,MAP2K1,XIAP,C2,GPSM3,NR1H3,PRKCQ,IL1RL2,CLOCK,MGLL,C3AR1,TNFAIP8L2,VAMP8,TNIP1,CCL4L2,BIRC3,CCL24,CD28,MYD88,NLRX1,CCL3,IL15,PIK3AP1,GP1BA,ACP5,IL10,CASP4,SMAD3,PLEK,C5AR1,LTA,VAMP7,NOS3,IL17RA,FCER1G,ZAP70,HPSE,MAPK14,IL33,ADA,CASP1,STXBP5,TLR4,NOD2,GGT1,TNFRSF11A,ETS1,DUSP10,CAPN3,ANO6,TNFRSF1B,CNR2,GBP5,NLRP6,SELP,JAK2,IL17RC,TLR2,SHARPIN,TXK,IL1B,EDNRB,SNX6,CCR7,IL18,CD6,NOS2,CR1,HCK,PI…	156	0.435754	A2M,ABAT,ABR,ACE2,ACP5,ADA,ADAM8,ADAMTS12,ADAMTS18,ADIPOQ,ADORA1,ADORA2B,ADRA2A,ADRB2,AGER,AGT,AGTR1,AHSG,ANO6,ANXA1,ANXA2,ANXA5,APCS,APOA1,APOD,APOE,APOH,ARFGEF1,ASH1L,BCL6,BCR,BIRC2,BIRC3,BRAF,BRD4,C1QBP,C1QTNF1,C1QTNF3,C2,C3,C3AR1,C4A,C4B,C4BPA,C4BPB,C5,C5AR1,C6,C7,C8A,C8B,C8G,C9,CALCRL,CAPN3,CASK,CASP1,CASP4,CAV1,CCL11,CCL13,CCL14,CCL15,CCL16,CCL18,CCL2,CCL23,CCL24,CCL3,CCL4,CCL4L2,CCL5,CCL7,…	Human
NCB-CB	_tstat	within each collection	BP: GO biological process	GO_MITOCHONDRIAL_RESPIRATORY_CHAIN_COMPLEX_I_BIOGENESIS	0.00142045	0.00941342	-0.440749	-1.79863	2	51	NDUFAF1,TAZ,NDUFS7,NDUFA1,NDUFV3,AIFM1,NDUFAF3,FOXRED1,NDUFAB1,TMEM126B,NDUFB11,NDUFA6,NDUFA10,NDUFS6,NDUFB10,NDUFS4,NDUFS1,NDUFB3,BCS1L,NDUFA2,NDUFV1,NDUFC1,NDUFB6,NDUFV2,OXA1L,NDUFS3,NDUFB9,NDUFB2,NDUFC2,NDUFB1	30	0.588235	ACAD9,AIFM1,BCS1L,ECSIT,FOXRED1,NDUFA1,NDUFA10,NDUFA11,NDUFA12,NDUFA13,NDUFA2,NDUFA3,NDUFA5,NDUFA6,NDUFA7,NDUFA8,NDUFA9,NDUFAB1,NDUFAF1,NDUFAF2,NDUFAF3,NDUFAF4,NDUFB1,NDUFB10,NDUFB11,NDUFB2,NDUFB3,NDUFB4,NDUFB5,NDUFB6,NDUFB7,NDUFB8,NDUFB9,NDUFC1,NDUFC2,NDUFS1,NDUFS2,NDUFS3,NDUFS4,NDUFS5,NDUFS6,NDUFS7,NDUFS8,NDUFV1,NDUFV2,NDUFV3,NUBPL,OXA1L,TAZ,TIMMDC1,TMEM126B	Human
NCB-CB	_tstat	within each collection	BP: GO biological process	GO_NEGATIVE_REGULATION_OF_VIRAL_PROCESS	0.000495	0.00530695	-0.399043	-1.79764	0	83	APOBEC3D,APOBEC3G,PARP10,TRIM25,ZC3HAV1,OAS1,TNIP1,TRIM21,CCL3,FAM111A,BST2,TRIM31,C19orf66,APOBEC3F,MX1,IFITM1,MID2,OAS3,EIF2AK2,TRIM14,FCN1,TRIM26,APOBEC3C,IFIT1,ISG20,SP100,CCL4,PLSCR1,CCL5,RNASEL,TRIM5,EIF2AK4,PML,RSAD2,IFI16,ISG15,ZC3H12A	37	0.445783	ADAR,APCS,APOBEC3A,APOBEC3C,APOBEC3D,APOBEC3F,APOBEC3G,BST2,BTBD17,C19orf66,CCL3,CCL4,CCL5,CCNK,CHMP3,EIF2AK2,EIF2AK4,FAM111A,FBLN1,FCN1,FCN3,GSN,HDAC1,HMGA2,IFI16,IFIT1,IFITM1,IFITM2,IFITM3,ILF3,INPP5K,ISG15,ISG20,JUN,LTF,MAVS,MBL2,MID2,MX1,OAS1,OAS3,OASL,PARP10,PLSCR1,PML,POU2F3,PROX1,PTX3,REST,RNASEL,RSAD2,SLPI,SNX3,SP100,SRPK1,SRPK2,STAT1,TARDBP,TFAP4,TNF,TNIP1,TRIM10,TRIM11,TRIM13,TRIM14,TRI…	Human
NCB-CB	_tstat	within each collection	BP: GO biological process	GO_CELL_KILLING	0.00178253	0.0111936	-0.47427	-1.79388	3	36	RAB27A,MICB,APOL1,GNLY,DEFA1,VAMP7,CRTAM,GZMB,BAD,CORO1A,SLAMF7,CCR2,UNC13D,LYST,CTSH,PTPN6	16	0.444444	ALB,APOL1,BAD,BCL2L11,C9,CADM1,CCR2,CEBPG,CHGA,CORO1A,CRTAM,CTSC,CTSG,CTSH,DEFA1,EMP2,GNLY,GZMB,HAMP,LYST,MBL2,MICA,MICB,PRDX1,PTPN6,RAB27A,SLAMF7,STXBP2,TREM1,TUBB,TUBB4B,TUSC2,ULBP3,UNC13D,VAMP2,VAMP7	Human
NCB-CB	_tstat	within each collection	BP: GO biological process	GO_REGULATION_OF_NECROTIC_CELL_DEATH	0.00533096	0.0259253	-0.547285	-1.79208	11	21	PPIF,CASP8,BIRC3,TRADD,SLC25A4,RIPK3,RIPK1,CAV1,CFLAR,FADD,RPS27A,UCN	12	0.571429	ARHGEF2,BIRC2,BIRC3,CASP8,CAV1,CFLAR,FADD,HEBP2,PPIF,RBCK1,RIPK1,RIPK3,RPS27A,SLC25A4,TRADD,TRAF2,TSPO,UBA52,UBB,UBC,UCN	Human
NCB-CB	_tstat	within each collection	BP: GO biological process	GO_SMALL_MOLECULE_CATABOLIC_PROCESS	0.000635	0.00533609	-0.326486	-1.79025	0	303	RENBP,HK3,DDO,MTRR,SESN2,PCBD1,ALDH5A1,LPIN3,HADHB,CARNS1,DECR1,ACOT4,QPRT,CPT1B,DLD,ETFA,NOS3,MCCC2,HOGA1,SYNJ1,AMDHD2,INPP1,ENO3,IVD,NPL,HADHA,NUDT9,GLUD2,LIPE,HADH,ABCD1,CYP26C1,THNSL2,TKTL1,OAT,PPM1K,HNMT,NOS2,SCP2,AKR1B10,BAD,CRAT,PEX7,PGM2,MCEE,CBR3,FUT4,GLUD1,ENPP2,SMPDL3A,ASRGL1,CBS,KYNU,ABCD2,FAAH,PCYOX1,ECHS1,ACADS,PLA2G15,GOT2,CYP27B1,SLC44A1,ASL,PNKD,GK,CROT,QDPR,CHDH,MTHFS,ACAD11,XYL…	130	0.429043	AADAT,AASS,ABAT,ABCD1,ABCD2,ABCD3,ABHD10,ABHD12,ACAA1,ACAD10,ACAD11,ACAD8,ACAD9,ACADL,ACADM,ACADS,ACADSB,ACADVL,ACAT1,ACMSD,ACOT4,ACOT8,ACOX1,ACOX2,ACOX3,ACOXL,ACSF3,ADH4,ADH5,ADIPOQ,ADO,AFMID,AGXT,AGXT2,AHCY,AKR1A1,AKR1B10,AKR1C3,AKR1D1,ALDH1A1,ALDH1B1,ALDH1L1,ALDH1L2,ALDH2,ALDH3A2,ALDH3B1,ALDH3B2,ALDH4A1,ALDH5A1,ALDH6A1,ALDH7A1,ALDOA,ALDOB,ALDOC,AMACR,AMDHD1,AMDHD2,AMT,APOE,ARG1,ASL,ASPA,ASRGL1…	Human
NCB-CB	_tstat	within each collection	BP: GO biological process	GO_LYMPHOCYTE_HOMEOSTASIS	0.00184247	0.0113496	-0.446049	-1.78742	3	46	CASP3,SLC40A1,TNFRSF13B,LAT,NCKAP1L,GPR174,TNFRSF17,RIPK3,SLC39A3,RAG1,MEF2C,PPP2R3C,P2RX7,IL2RA,CORO1A,CACNA1F,LYN,FOXP3,TNFSF14,JAK3,BAK1,FAS,DNAJA3,STAT5B,TNFAIP3	25	0.543478	ABL1,AKT1,BAK1,BAX,BCL2,BCL2L11,CACNA1F,CASP3,CCNB2,CORO1A,DNAJA3,FADD,FAS,FOXN1,FOXP3,GAPT,GPR174,HIF1A,IL2RA,JAK3,LAT,LYN,MEF2C,NCKAP1L,P2RX7,PKN1,PMAIP1,PPP2R3C,PPP3CB,RAG1,RC3H1,RC3H2,RIPK3,RPS6,SIVA1,SKIL,SLC39A3,SLC40A1,SOS1,STAT5B,TNFAIP3,TNFRSF13B,TNFRSF13C,TNFRSF17,TNFSF14,ZC3H8	Human
NCB-CB	_tstat	within each collection	BP: GO biological process	GO_CALCIUM_MEDIATED_SIGNALING	0.000486	0.00530695	-0.400098	-1.78587	0	78	CAMK2D,LAT2,BTK,CCL3,NCALD,MCU,NFATC2,LAT,GSTO1,CAMKK2,HTR2B,LRRK2,CLIC2,P2RY11,SELP,CASQ1,CCR5,CALM3,VCAM1,NMUR1,GSTM2,PTGFR,KISS1R,BHLHA15,RCAN2,PPP1R9B,AVPR1A,PRKACA,PPP3CA,SLC8A1,PPP3R1,CXCR3	32	0.410256	AGTR1,ANK2,ASPH,ATP1A2,ATP1B1,ATP2A2,AVPR1A,BCAP31,BHLHA15,BTK,CACNA1C,CALM1,CALM2,CALM3,CAMK2D,CAMKK2,CASQ1,CASQ2,CCL3,CCR5,CLIC2,CXCR3,CXCR4,DMD,DMPK,DRD1,EDN1,EDN2,EGFR,EIF2AK3,FIS1,FKBP1B,GPR143,GSTM2,GSTO1,HDAC4,HRC,HTR2B,KDR,KISS1R,LAT,LAT2,LRRK2,MCTP1,MCTP2,MCU,NCALD,NFATC1,NFATC2,NFATC4,NMUR1,NTRK2,NUDT4,P2RY11,PDPK1,PLA2G4B,PLCE1,PLCG1,PLCG2,PLN,PPP1R9A,PPP1R9B,PPP3CA,PPP3CB,PPP3R1,PRKAC…	Human
NCB-CB	_tstat	within each collection	BP: GO biological process	GO_REGULATION_OF_CD4_POSITIVE_ALPHA_BETA_T_CELL_ACTIVATION	0.00314748	0.0170788	-0.479797	-1.78488	6	34	PRKCQ,IL4R,NCKAP1L,CD86,SASH3,CD80,IL12RB1,RIPK2,HLX,NLRP3,AGER,IRF4,FOXP3,JAK3,LGALS9,IL23A,IL27,CCL19,IFNG	19	0.558824	AGER,ANXA1,BCL6,CCL19,CD55,CD80,CD83,CD86,FOXP3,GATA3,HLX,HMGB1,IFNG,IL12RB1,IL23A,IL27,IL4R,IL6,IRF4,JAK3,LGALS9,MYB,NCKAP1L,NLRP3,PRKCQ,PRKCZ,RARA,RC3H1,RIPK2,SASH3,SOCS5,TNFSF18,TNFSF4,XCL1	Human
NCB-CB	_tstat	within each collection	BP: GO biological process	GO_POSITIVE_REGULATION_OF_INTERFERON_ALPHA_PRODUCTION	0.00831146	0.0369192	-0.584035	-1.78229	18	16	ZC3HAV1,IRF5,TLR4,RIPK2,TLR8,IFIH1,TLR7,TLR3,IRF7	9	0.5625	DDX58,HMGB1,HSPD1,IFIH1,IRF3,IRF5,IRF7,MAVS,RIPK2,TBK1,TLR3,TLR4,TLR7,TLR8,TLR9,ZC3HAV1	Human
NCB-CB	_tstat	within each collection	BP: GO biological process	GO_REGULATION_OF_ANTIGEN_RECEPTOR_MEDIATED_SIGNALING_PATHWAY	0.002693	0.0152498	-0.464809	-1.78014	5	38	STAP1,UBASH3A,TRAT1,LPXN,ADA,PTPN22,LCK,GBP1,NFAM1,FCRL5,CD300A,PRKCH,PTPRC,CCR7,CACNA1F,LYN	16	0.421053	ADA,BCL10,CACNA1F,CCR7,CD300A,CEACAM1,CMTM3,DUSP22,DUSP3,ELF1,EZR,FCRL5,GBP1,KCNN4,LCK,LGALS3,LPXN,LYN,MALT1,NFAM1,PAWR,PHPT1,PLCL2,PRKCB,PRKCH,PRKD2,PRNP,PTPN2,PTPN22,PTPN6,PTPRC,PTPRJ,RC3H1,SLC39A10,STAP1,THY1,TRAT1,UBASH3A	Human
NCB-CB	_tstat	within each collection	BP: GO biological process	GO_REGULATION_OF_NEUTROPHIL_CHEMOTAXIS	0.0049195	0.0241421	-0.517206	-1.77724	10	25	MPP1,C3AR1,CD74,C5AR1,NCKAP1L,TIRAP,RAC2,IL1B,CCR7,DAPK2,THBS4,CCL21	12	0.48	C1QBP,C3AR1,C5AR1,CAMK1D,CCL19,CCL21,CCR7,CD74,CXCL1,CXCL2,CXCL3,DAPK2,EDNRA,IL1B,IL23A,JAM3,LBP,MPP1,NCKAP1L,RAC1,RAC2,SLIT2,THBS4,TIRAP,XCL1	Human
NCB-CB	_tstat	within each collection	BP: GO biological process	GO_REGULATION_OF_LEUKOCYTE_APOPTOTIC_PROCESS	0.000484	0.00530695	-0.405923	-1.77445	0	71	PRKCQ,CD274,LILRB1,CD74,BTK,IL10,FCER1G,FNIP1,DOCK8,ADA,NOD2,GIMAP8,RIPK3,RAG1,MEF2C,CD27,CCR7,P2RX7,AXL,CCL21,LYN,ADAM8,CCL5,PDCD1,JAK3,MERTK,LGALS9,RAPGEF2,FAS,BBC3,IRF7,PTEN,HSH2D,CCL19,HCAR2,BMP4	36	0.507042	ADA,ADAM17,ADAM8,ANXA1,AURKB,AXL,BAX,BBC3,BCL10,BCL6,BIRC7,BMP4,BTK,CCL19,CCL21,CCL5,CCR7,CD27,CD274,CD3G,CD74,CDKN2A,CXCL12,DOCK8,FADD,FAS,FCER1G,FNIP1,FOXP1,GAS6,GIMAP8,GPAM,HCAR2,HCLS1,HIF1A,HSH2D,IDO1,IL10,IRF7,IRS2,ITPKB,JAK3,KITLG,LGALS3,LGALS9,LILRB1,LYN,MEF2C,MERTK,MIF,NOC2L,NOD2,NR4A3,P2RX7,PDCD1,PRELID1,PRKCQ,PTEN,RAG1,RAPGEF2,RIPK3,RORC,SIRT1,SLC39A10,ST6GAL1,TCP1,TGFB2,TP53,TSC22D3,WN…	Human
NCB-CB	_tstat	within each collection	BP: GO biological process	GO_OSTEOCLAST_DIFFERENTIATION	0.00493716	0.0241921	-0.501699	-1.77338	10	28	SNX10,LRRK1,CSF1,ACP5,MAPK14,CSF1R,TNFRSF11A,GAB2,TNF,TNFSF11,CD109,EFNA2,FARP2,ANXA2,SBNO2,SRC	16	0.571429	ACP5,ANXA2,CD109,CSF1,CSF1R,CTNNB1,EFNA2,EPHA2,FAM20C,FARP2,FOXP1,GAB2,GLO1,GPC3,JUNB,LRRK1,MAPK14,OSTM1,PAFAH1B1,SBNO2,SH3PXD2A,SNX10,SRC,TFRC,TNF,TNFRSF11A,TNFSF11,TRAF6	Human
NCB-CB	_tstat	within each collection	BP: GO biological process	GO_NUCLEOTIDE_SUGAR_BIOSYNTHETIC_PROCESS	0.00661376	0.0308642	-0.553622	-1.77208	14	19	RENBP,GNPNAT1,AMDHD2,UGDH,SLC35D1,PMM1,PGM3,GMDS,UGP2,MPI,TSTA3	11	0.578947	AMDHD2,GFPT1,GFPT2,GMDS,GMPPB,GNPNAT1,MPI,NAGK,PGM3,PMM1,PMM2,RENBP,SLC35D1,TSTA3,UAP1,UAP1L1,UGDH,UGP2,UXS1	Human
NCB-CB	_tstat	within each collection	BP: GO biological process	GO_REGULATION_OF_INTERFERON_BETA_PRODUCTION	0.00181488	0.0112439	-0.448418	-1.7697	3	43	ZC3HAV1,IRF1,LILRB1,NLRX1,TIRAP,IRF5,PPM1B,NMI,TLR4,IFNAR1,RIPK2,TLR2,TLR8,IFIH1,TRIM38,TLR7,PYCARD,POLR3G,TLR3,TRAF3,IRF7,RELB	22	0.511628	DDX3X,DDX58,FLOT1,HMGB1,HMGB2,IFIH1,IFNAR1,IRF1,IRF3,IRF5,IRF7,LILRB1,MAVS,NLRX1,NMI,POLR3A,POLR3B,POLR3C,POLR3D,POLR3F,POLR3G,PPM1B,PYCARD,REL,RELB,RIPK2,RNF135,RNF216,TBK1,TICAM1,TIRAP,TLR2,TLR3,TLR4,TLR7,TLR8,TLR9,TRAF3,TRAF3IP1,TRAIP,TRIM38,ZBTB20,ZC3HAV1	Human
NCB-CB	_tstat	within each collection	BP: GO biological process	GO_REGULATION_OF_CHEMOKINE_PRODUCTION	0.00240038	0.0140377	-0.426904	-1.76698	4	55	MAPK9,IL4R,CD74,TICAM2,SIGIRR,IL10,HAVCR2,TIRAP,CSF1R,IL33,EIF2AK2,TLR4,RIPK2,TLR2,IL1B,MAP2K5,IL6R,TLR7,PYCARD,HMOX1,TLR3,LGALS9,TNF,IFNG,C1QTNF3,TRPV4,APOD	27	0.490909	ADAM17,ADIPOQ,ADORA2B,ALOX15B,APOD,C1QTNF3,C5,CD74,CSF1R,DDX3X,EIF2AK2,F2RL1,GSTP1,HAVCR2,HIF1A,HMOX1,IFNG,IL10,IL1B,IL1RL1,IL33,IL4R,IL6,IL6R,KLF4,LBP,LGALS9,LPL,MAP2K5,MAPK9,MAVS,MEFV,MIF,MUL1,P2RY2,POSTN,PYCARD,RIPK2,SIGIRR,SNAI2,SOCS5,TICAM1,TICAM2,TIRAP,TLR2,TLR3,TLR4,TLR7,TLR9,TNF,TRIM32,TRPV4,TWIST1,WNT5A,ZFPM1	Human
NCB-CB	_tstat	within each collection	BP: GO biological process	GO_REGULATION_OF_TYPE_2_IMMUNE_RESPONSE	0.00766111	0.034507	-0.526107	-1.76594	16	23	IL4R,CD74,IL27RA,CD86,IL33,NOD2,CCR2,HLX,NLRP3,STAT6,RSAD2	11	0.478261	ANXA1,BCL6,CCR2,CD74,CD86,ECM1,GATA3,HLX,IDO1,IL27RA,IL33,IL4R,IL6,NDFIP1,NLRP3,NOD2,PRKCZ,RARA,RSAD2,SOCS5,STAT6,TNFSF4,XCL1	Human
NCB-CB	_tstat	within each collection	BP: GO biological process	GO_REGULATION_OF_T_CELL_CYTOKINE_PRODUCTION	0.00700525	0.0323643	-0.559456	-1.76472	15	18	B2M,HFE,HLA-A,SASH3,SLAMF1,NLRP3,FOXP3,FZD5,RSAD2	9	0.5	B2M,FOXP3,FZD5,GATA3,HFE,HLA-A,MALT1,MAP3K7,NLRP3,PRKCZ,RSAD2,SASH3,SLAMF1,TNFSF4,TRAF2,TRAF6,TRPM4,XCL1	Human
NCB-CB	_tstat	within each collection	BP: GO biological process	GO_REGULATION_OF_INTERLEUKIN_10_PRODUCTION	0.00180343	0.0112159	-0.457226	-1.76418	3	39	CD274,LILRB1,CD28,PDCD1LG2,FCER1G,TLR4,SASH3,NOD2,BCL3,CD40LG,TNFRSF9,AGER,IRF4,PYCARD,FOXP3,TIGIT,JAK3,LGALS9,IL23A	19	0.487179	AGER,BCL3,CD274,CD28,CD34,CD40LG,CD46,CD83,DLL1,FCER1G,FOXP3,HGF,HLA-DRB1,HLA-DRB5,HMGB1,HSPD1,IDO1,IL20RB,IL23A,IRF4,JAK3,LGALS9,LILRB1,NOD2,PDCD1LG2,PIBF1,PRKCZ,PTGER4,PYCARD,SASH3,TIGIT,TLR4,TLR9,TNFRSF21,TNFRSF9,TNFSF4,TRIB2,TUSC2,XCL1	Human
NCB-CB	_tstat	within each collection	BP: GO biological process	GO_REGULATION_OF_PROTEIN_SECRETION	0.000639	0.00533609	-0.320053	-1.76343	0	320	CD40,TNFRSF14,GSDMD,NR1H3,PRKCQ,ARRB1,HLA-E,TIAM1,CLOCK,CD274,GOLPH3,TLR1,AIM2,IL4R,BANK1,BLK,LILRB1,VEGFC,RASGRP1,CCL3,MCU,CD58,IL10,SLC25A5,KCNB1,SRGN,ANXA4,TLR6,SEC24A,HAVCR2,IL17RA,RAP1A,MAPK14,CSF1R,CRTAM,ARL2BP,ACVR1C,IL33,FGR,CASP1,GIPR,SIRT4,STXBP5,PTPN22,SLC25A4,GBP1,TLR4,SLC16A1,NOD2,NR1D1,HTR2B,ARNTL,IFNAR1,HADH,FCN1,CFTR,TRPM2,JAK2,IL17RC,TLR2,SLAMF1,IL1B,TLR8,BTN2A2,XBP1,CCR7,CD14,P2…	121	0.378125	AACS,ABAT,ABL1,ACHE,ACVR1C,ADAM8,ADAM9,ADCY5,ADRA2A,ADRA2C,AGTR2,AIM2,ALOX15B,ANG,ANGPT1,ANO1,ANXA1,ANXA4,ANXA5,APBB1,APOA1,APOA2,ARF1,ARFIP1,ARL2,ARL2BP,ARNTL,ARRB1,ATG5,ATP13A2,BAD,BANK1,BLK,BMP6,BMP8A,BRSK2,BTN2A2,C1QTNF3,C2CD2L,C5,CACNA1A,CACNA1C,CACNA1D,CACNA1E,CACNA2D2,CADM1,CAPN10,CARD8,CASP1,CCL19,CCL3,CCL5,CCR2,CCR7,CD14,CD2,CD244,CD274,CD276,CD34,CD38,CD40,CD40LG,CD58,CDK16,CFTR,CLEC4E,…	Human
NCB-CB	_tstat	within each collection	BP: GO biological process	GO_REGULATION_OF_CYSTEINE_TYPE_ENDOPEPTIDASE_ACTIVITY_INVOLVED_IN_APOPTOTIC_SIGNALING_PATHWAY	0.00671441	0.0312438	-0.53242	-1.76315	14	22	CASP8,HTRA2,TRADD,SMAD3,FASLG,JAK2,RIPK1,TNFSF10,LGALS9,FAS	10	0.454545	BAX,CASP8,FADD,FAS,FASLG,GSN,HTRA2,JAK2,LGALS9,MMP9,NLE1,PARK7,PIH1D1,PLAUR,RIPK1,SMAD3,TFAP4,TNFRSF10A,TNFRSF10B,TNFSF10,TRADD,TRAF2	Human
NCB-CB	_tstat	within each collection	BP: GO biological process	GO_ZYMOGEN_ACTIVATION	0.000508	0.00530695	-0.37452	-1.76312	0	104	MAPK9,CASP3,CASP8,TRADD,SMAD3,AIFM1,NKX3-1,FASLG,RPS27L,CASP7,CASP1,LCK,GGT1,BCL2L13,JAK2,ACER2,RIPK1,TBC1D10A,BAD,PPARG,P2RX1,TNFSF15,TNFSF10,NLRP3,PYCARD,BID,BCL2L10,NLRC4,DAP,CTSH,BAK1,PML,IFI16,FAS,BBC3,DNAJA3,S100A9,IFI27,TNF,KLKB1,F3	41	0.394231	ACER2,AIFM1,ANP32B,APAF1,APOH,ASPH,BAD,BAK1,BAX,BBC3,BCL2L10,BCL2L11,BCL2L13,BID,BOK,CARD8,CASP1,CASP2,CASP3,CASP7,CASP8,CASP8AP2,CASP9,CDKN1B,CDKN2A,CIDEB,COL4A3,CRADD,CTSH,CUZD1,CYCS,CYFIP2,DAP,DHCR24,DIABLO,DLC1,DNAJA3,EGLN3,EIF2AK3,F11,F12,F2R,F3,F9,FADD,FAM162A,FAS,FASLG,FGA,FGB,FGG,GGT1,HIP1,HSPD1,HSPE1,IFI16,IFI27,IFT57,JAK2,KLKB1,LCK,MAPK9,MMP14,MTCH1,MUL1,NGF,NGFR,NKX3-1,NLRC4,NLRP1,NLRP…	Human
NCB-CB	_tstat	within each collection	BP: GO biological process	GO_NEGATIVE_REGULATION_OF_CYTOKINE_PRODUCTION_INVOLVED_IN_IMMUNE_RESPONSE	0.00744308	0.0338208	-0.558639	-1.76214	16	18	HFE,LILRB1,BST2,IL10,SLAMF1,FOXP3,HMOX1,JAK3,ANGPT1,TNF	10	0.555556	ANGPT1,APOA1,APOA2,BCL6,BST2,CUEDC2,FOXP3,HFE,HMOX1,IL10,IRAK3,JAK3,LILRB1,SLAMF1,TGFB2,TGFB3,TNF,XCL1	Human
NCB-CB	_tstat	within each collection	BP: GO biological process	GO_STAT_CASCADE	0.00180018	0.0112159	-0.450302	-1.75822	3	41	PIAS1,IL15,STAT5A,PTK6,SOCS2,NMI,IFNAR2,IFNAR1,JAK2,MAPK3,EGF,CCR2,STAT4,MAPK1,LYN,AGER,OSM,IL31RA,JAK3	19	0.463415	AGER,CCL2,CCR2,CLCF1,CTR9,EGF,F2R,FER,FGFR3,GHR,HES1,IFNAR1,IFNAR2,IL15,IL31RA,JAK2,JAK3,LIF,LYN,MAPK1,MAPK3,NMI,OSM,PIAS1,PKD1,PKD2,PRLR,PTK6,PTPN1,SOCS1,SOCS2,SOCS3,SOCS5,SOCS6,STAMBP,STAT1,STAT2,STAT3,STAT4,STAT5A,STAT5B	Human
NCB-CB	_tstat	within each collection	BP: GO biological process	GO_REGULATION_OF_OSTEOCLAST_DIFFERENTIATION	0.00141443	0.00939273	-0.432044	-1.75565	2	50	TMEM64,CCR1,LILRB1,CCL3,ESRRA,GPR55,CSF1,CSF1R,TLR4,SIGLEC15,SLC9B2,LILRB4,INPP5D,TYROBP,TFE3,CCL5,RASSF2,PIK3R1,TLR3,IL23A,MAFB,MITF,PPARGC1B,TNF,TNFSF11,IFNG,LILRB3	27	0.54	ATP6AP1,BGLAP,CA2,CAMK4,CCL3,CCL5,CCR1,CEBPB,CREB1,CSF1,CSF1R,CTNNB1,ESRRA,FOS,FSTL3,GNAS,GPR55,GPR68,IFNG,IL23A,INPP5D,KLF10,LILRB1,LILRB3,LILRB4,LRRC17,LTF,MAFB,MITF,MTOR,NF1,PIK3R1,PPARGC1B,RASSF2,SFRP1,SIGLEC15,SLC9B2,TFE3,TJP2,TLR3,TLR4,TMEM64,TNF,TNFSF11,TOB2,TRAF6,TYROBP,UBASH3B,ZBTB7A,ZNF675	Human
NCB-CB	_tstat	within each collection	BP: GO biological process	GO_T_CELL_PROLIFERATION	0.0044964	0.0225099	-0.471711	-1.75479	9	34	PSMB10,LILRB1,IL15,CD86,BTN3A1,CRTAM,DOCK8,SATB1,DOCK2,RIPK2,P2RX7,EBI3,PIK3CG,TNFRSF4,ELF4,TNFSF14	16	0.470588	ABL1,BAX,BTN3A1,CADM1,CCND3,CD151,CD86,CRTAM,DOCK2,DOCK8,EBI3,ELF4,FKBP1B,FYN,IL15,IL23A,LILRB1,MALT1,NCSTN,P2RX7,PIK3CG,PPP3CB,PSMB10,RC3H1,RC3H2,RIPK2,RPS6,SATB1,SLC11A1,TNFRSF4,TNFSF14,TNFSF18,TNFSF4,WNT4	Human
NCB-CB	_tstat	within each collection	BP: GO biological process	GO_MYELOID_DENDRITIC_CELL_DIFFERENTIATION	0.00918635	0.0397706	-0.573478	-1.75007	20	16	BATF2,BATF3,CD86,BATF,SPI1,LTBR,IRF4,UBD,RELB,TGFBR2,TNFSF9	11	0.6875	BATF,BATF2,BATF3,CAMK4,CD86,DHRS2,IRF4,LTBR,PSEN1,RBPJ,RELB,SPI1,TGFBR2,TNFSF9,TRAF6,UBD	Human
NCB-CB	_tstat	within each collection	BP: GO biological process	GO_GLYCOSYL_COMPOUND_CATABOLIC_PROCESS	0.00449236	0.0225099	-0.467023	-1.74966	9	35	APOBEC3G,UPP1,HPRT1,APOBEC3F,DPYD,ADA,NUDT9,APOBEC3C,ADAL,TYMP,FUCA1,NAGA,DERA,MLYCD	14	0.4	ABHD10,ADA,ADAL,AHCY,AMPD3,APOBEC3A,APOBEC3C,APOBEC3F,APOBEC3G,CDA,DERA,DPYD,DPYS,ENPP4,ENTPD4,FUCA1,FUCA2,GBA2,GBA3,HPRT1,MLYCD,MTAP,NAGA,NT5C,NT5E,NT5M,NUDT18,NUDT7,NUDT9,PNP,PRTFDC1,TYMP,UPB1,UPP1,UPP2	Human
NCB-CB	_tstat	within each collection	BP: GO biological process	GO_ALPHA_BETA_T_CELL_ACTIVATION	0.0013947	0.00929992	-0.432961	-1.747	2	48	HLA-E,IRF1,IL15,TCF7,BATF,ZAP70,ITK,TNFSF8,SATB1,DOCK2,SLAMF6,BCL3,PLA2G2D,EOMES,LY9,ELF4,IRF4,FOXP3,STAT6,RSAD2,BMX,RELB,PTGER4,IFNG	24	0.5	ABL1,ANXA1,ATP7A,BATF,BCL11B,BCL2,BCL3,BMX,BRAF,CEBPB,DOCK2,ELF4,EOMES,FOXP1,FOXP3,FUT7,GATA3,HLA-E,HMGB1,IFNG,IL15,IL18R1,IL6,IRF1,IRF4,ITK,LEF1,LY9,PLA2G2D,PTGER4,RC3H1,RC3H2,RELB,RORA,RORC,RPL22,RSAD2,SATB1,SEMA4A,SLAMF6,STAT6,STOML2,SYK,TCF7,TNFSF4,TNFSF8,ZAP70,ZFPM1	Human
NCB-CB	_tstat	within each collection	BP: GO biological process	GO_POSITIVE_REGULATION_OF_CATION_CHANNEL_ACTIVITY	0.00491291	0.0241421	-0.484071	-1.74632	10	30	KCNE3,CTSS,RNF207,GSTO1,CALM3,CACNA2D1,GSTM2,STIM1,TRDN,AKAP7,S100A1,BMP4,GAL,ACTN2,FGF14,HAP1	16	0.533333	ACTN2,AKAP6,AKAP7,ANK2,ANK3,ASPH,BMP4,CACNA2D1,CACNB2,CALM1,CALM2,CALM3,CTSS,FGF14,GAL,GSTM2,GSTO1,HAP1,HTT,JPH2,KCNE3,KCNJ11,NOS1AP,PKD2,PLCG2,RNF207,S100A1,STIM1,STIM2,TRDN	Human
NCB-CB	_tstat	within each collection	BP: GO biological process	GO_POSITIVE_REGULATION_OF_LEUKOCYTE_MIGRATION	0.00100807	0.00710257	-0.373053	-1.74501	1	101	TNFRSF14,GPSM3,CCR1,C3AR1,CD74,VEGFC,CCL24,CCL3,CSF1,C5AR1,NCKAP1L,AIF1,TIRAP,CMKLR1,ITGA4,RAC2,ANO6,CXCL11,SELP,IL1B,CCR7,ADAM10,CCL8,DAPK2,PTGER3,PTAFR,CCR2,THBS4,CCL4,IL6R,CCL21,PYCARD,CCL7,TNFRSF18,ADAM8,TNFSF14,CXCL9,CCL5,TACR1,CXCL13,LGALS9,IL23A,PTK2B,CX3CL1,RARRES2,TNF,PTGER4,CCL19,CXCL10	49	0.485149	ADAM10,ADAM17,ADAM8,AIF1,ANO6,C1QBP,C3AR1,C5AR1,CALR,CAMK1D,CCL19,CCL2,CCL20,CCL21,CCL24,CCL3,CCL4,CCL5,CCL7,CCL8,CCR1,CCR2,CCR6,CCR7,CD74,CMKLR1,CREB3,CSF1,CX3CL1,CXCL1,CXCL10,CXCL11,CXCL12,CXCL13,CXCL14,CXCL2,CXCL3,CXCL5,CXCL6,CXCL9,DAPK2,EDN2,EDN3,EDNRA,F2RL1,F7,FADD,GAS6,GPSM3,HMGB1,ICAM1,IL12A,IL1B,IL23A,IL6,IL6R,ITGA2,ITGA2B,ITGA4,KITLG,LBP,LGALS3,LGALS9,MIA3,NCKAP1L,PAWR,PDGFD,PLA2G7,PLVAP…	Human
NCB-CB	_tstat	within each collection	BP: GO biological process	GO_REGULATION_OF_GRANULOCYTE_CHEMOTAXIS	0.00356506	0.0187775	-0.461174	-1.74435	7	36	MPP1,C3AR1,CD74,CSF1,C5AR1,NCKAP1L,TIRAP,CMKLR1,RAC2,IL1B,CCR7,DAPK2,THBS4,CCL21,CCL5,IL23A,CX3CL1,RARRES2,CCL19	19	0.527778	C1QBP,C3AR1,C5AR1,CAMK1D,CCL19,CCL2,CCL21,CCL5,CCR7,CD74,CMKLR1,CSF1,CX3CL1,CXCL1,CXCL2,CXCL3,DAPK2,EDNRA,IL1B,IL23A,JAM3,LBP,MPP1,NCKAP1L,RAC1,RAC2,RARRES2,S100A14,S100A7,SLIT2,THBS1,THBS4,TIRAP,TNFSF18,TRPV4,XCL1	Human
NCB-CB	_tstat	within each collection	BP: GO biological process	GO_AEROBIC_RESPIRATION	0.00140384	0.00934158	-0.43051	-1.74425	2	49	IDH3A,SDHD,SDHA,SUCLG1,UQCRB,DLD,ME3,MDH1,MTFR1,UQCR10,SUCLG2,SDHB,UQCRC2,FXN,PDHA1,IDH1,IDH3G,FH,UQCRC1,NDUFV1,BLOC1S1,OXA1L,MDH2,ACO2,NNT,DHTKD1,ACO1,UCN	28	0.571429	ACO1,ACO2,BLOC1S1,CAT,CHCHD5,COX10,COX19,CS,DHTKD1,DLAT,DLD,DLST,FH,FXN,IDH1,IDH2,IDH3A,IDH3B,IDH3G,MDH1,MDH1B,MDH2,ME3,MTFR1,NDUFV1,NNT,OGDH,OGDHL,OXA1L,PANK2,PDHA1,PDHB,PMPCB,SDHA,SDHB,SDHC,SDHD,SIRT3,SLC25A14,SUCLA2,SUCLG1,SUCLG2,SURF1,UCN,UQCR10,UQCRB,UQCRC1,UQCRC2,UQCRH	Human
NCB-CB	_tstat	within each collection	BP: GO biological process	GO_POSITIVE_REGULATION_OF_RESPONSE_TO_BIOTIC_STIMULUS	0.0044964	0.0225099	-0.468668	-1.74347	9	34	ZC3HAV1,NCR3,LY96,CD180,DHX58,HAVCR2,CRTAM,RIPK2,KLRK1,MAPK3,DDX60,LY86,KLRC4-KLRK1,CYBA	14	0.411765	ANKRD17,BMP6,CD180,CD226,CRTAM,CYBA,DDX60,DHX58,F2RL1,HAVCR2,HRG,HSPD1,IL12A,KLK5,KLK7,KLRC4-KLRK1,KLRK1,LRSAM1,LY86,LY96,MAPK3,MIF,NCR3,NOD1,PRKCA,PUM1,PUM2,PVR,RIPK2,SASH1,TBK1,TRAF6,TRIM15,ZC3HAV1	Human
NCB-CB	_tstat	within each collection	BP: GO biological process	GO_POSITIVE_REGULATION_OF_CHEMOKINE_PRODUCTION	0.00226347	0.0133334	-0.443486	-1.74035	4	42	MAPK9,IL4R,CD74,TICAM2,HAVCR2,TIRAP,CSF1R,IL33,EIF2AK2,TLR4,RIPK2,TLR2,IL1B,IL6R,TLR7,PYCARD,HMOX1,TLR3,LGALS9,TNF,IFNG,TRPV4	22	0.52381	ADAM17,ADIPOQ,ADORA2B,ALOX15B,C5,CD74,CSF1R,DDX3X,EIF2AK2,HAVCR2,HIF1A,HMOX1,IFNG,IL1B,IL1RL1,IL33,IL4R,IL6,IL6R,LBP,LGALS9,LPL,MAPK9,MAVS,MIF,P2RY2,POSTN,PYCARD,RIPK2,TICAM1,TICAM2,TIRAP,TLR2,TLR3,TLR4,TLR7,TLR9,TNF,TRIM32,TRPV4,TWIST1,WNT5A	Human
NCB-CB	_tstat	within each collection	BP: GO biological process	GO_NEGATIVE_REGULATION_OF_LEUKOCYTE_APOPTOTIC_PROCESS	0.00270514	0.0152678	-0.450904	-1.73979	5	39	PRKCQ,LILRB1,CD74,FCER1G,DOCK8,ADA,NOD2,RAG1,CD27,CCR7,AXL,CCL21,CCL5,JAK3,MERTK,IRF7,HSH2D,CCL19,BMP4	19	0.487179	ADA,AURKB,AXL,BCL10,BCL6,BMP4,CCL19,CCL21,CCL5,CCR7,CD27,CD74,CXCL12,DOCK8,FADD,FCER1G,FOXP1,GAS6,GPAM,HCLS1,HIF1A,HSH2D,IDO1,IRF7,IRS2,ITPKB,JAK3,KITLG,LILRB1,MERTK,MIF,NOC2L,NOD2,PRKCQ,RAG1,RORC,SLC39A10,ST6GAL1,TSC22D3	Human
NCB-CB	_tstat	within each collection	BP: GO biological process	GO_POSITIVE_REGULATION_OF_PHAGOCYTOSIS	0.00226347	0.0133334	-0.443276	-1.73953	4	42	RAB27A,C2,STAP1,NCKAP1L,FCER1G,RAP1A,DOCK2,ANO6,IL1B,SFTPD,PPARG,BCR,CD36,AGER,PYCARD,MERTK,CYBA,ABCA7,PROS1,TNF	20	0.47619	ABCA7,ABR,AGER,AHSG,ANO6,BCR,C2,C3,C4A,C4B,CALR,CAMK1D,CCL2,CD36,CD47,CYBA,DNM2,DOCK2,F2RL1,FCER1G,GAS6,GATA2,IL1B,ITGA2,ITGAV,LBP,LMAN2,MBL2,MERTK,MFGE8,NCKAP1L,PPARG,PROS1,PTX3,PYCARD,RAB27A,RAP1A,SFTPD,SLC11A1,STAP1,TNF,TUB	Human
NCB-CB	_tstat	within each collection	BP: GO biological process	GO_REGULATION_OF_NEUTROPHIL_MIGRATION	0.00672948	0.0312601	-0.487384	-1.73805	14	29	MPP1,C3AR1,CD74,C5AR1,NCKAP1L,TIRAP,RAC2,IL1B,CCR7,DAPK2,PTGER3,THBS4,CCL21,ADAM8,IL23A,PTGER4,CCL19	17	0.586207	ADAM8,C1QBP,C3AR1,C5AR1,CAMK1D,CCL19,CCL21,CCR7,CD74,CXCL1,CXCL2,CXCL3,DAPK2,EDNRA,IL1B,IL23A,JAM3,LBP,MPP1,NCKAP1L,PAWR,PTGER3,PTGER4,RAC1,RAC2,SLIT2,THBS4,TIRAP,XCL1	Human
NCB-CB	_tstat	within each collection	BP: GO biological process	GO_REGULATION_OF_SEQUESTERING_OF_CALCIUM_ION	0.000999	0.00708148	-0.375344	-1.73448	1	94	IBTK,CAMK2D,CCL3,GSTO1,LCK,FCRL5,CAPN3,HTR2B,CLIC2,CXCL11,JPH3,CASQ1,MYO5A,PTPRC,CCR7,P2RX7,CCR5,CALM3,CORO1A,RYR1,GSTM2,CCL21,LYN,JSRP1,TRDN,CXCL9,PTPN6,CYBA,BBC3,NOS1,PRKACA,PTK2B,SLC8A1,RASA3,DRD2,CXCR3,CCL19,CXCL10,TPCN2,TRPV1,PDPK1	41	0.43617	ABL1,AKAP6,ANK2,ASPH,ATG5,ATP1A2,BAX,BBC3,CACNA1C,CALM1,CALM2,CALM3,CAMK2D,CAPN3,CASQ1,CASQ2,CCL19,CCL21,CCL3,CCR5,CCR7,CHERP,CLIC2,CORO1A,CXCL10,CXCL11,CXCL9,CXCR3,CYBA,DDIT3,DIAPH1,DMD,DRD1,DRD2,EDNRA,F2,F2R,F2RL3,FCRL5,FGF2,FKBP1A,FKBP1B,GSTM2,GSTO1,HAP1,HRC,HTR2A,HTR2B,HTR2C,HTT,IBTK,ITPR1,ITPR2,ITPR3,JPH1,JPH2,JPH3,JPH4,JSRP1,LCK,LYN,MCOLN1,MYO5A,NOS1,P2RX7,PDE4D,PDPK1,PKD2,PLCG1,PLCG2,PLN,P…	Human
NCB-CB	_tstat	within each collection	BP: GO biological process	GO_MITOCHONDRIAL_RESPIRATORY_CHAIN_COMPLEX_ASSEMBLY	0.001443	0.00950441	-0.406242	-1.73401	2	63	NDUFAF1,TAZ,NDUFS7,NDUFA1,NDUFV3,AIFM1,UQCRB,TFAM,NDUFAF3,UQCR10,FOXRED1,NDUFAB1,TMEM126B,NDUFB11,NDUFA6,NDUFA10,SDHAF1,NDUFS6,NDUFB10,NDUFS4,NDUFS1,NDUFB3,BCS1L,NDUFA2,NDUFV1,NDUFC1,IMMP2L,NDUFB6,NDUFV2,OXA1L	30	0.47619	AARS2,ACAD9,AIFM1,BCS1L,CHCHD5,COX19,ECSIT,FOXRED1,IMMP1L,IMMP2L,NDUFA1,NDUFA10,NDUFA11,NDUFA12,NDUFA13,NDUFA2,NDUFA3,NDUFA5,NDUFA6,NDUFA7,NDUFA8,NDUFA9,NDUFAB1,NDUFAF1,NDUFAF2,NDUFAF3,NDUFAF4,NDUFB1,NDUFB10,NDUFB11,NDUFB2,NDUFB3,NDUFB4,NDUFB5,NDUFB6,NDUFB7,NDUFB8,NDUFB9,NDUFC1,NDUFC2,NDUFS1,NDUFS2,NDUFS3,NDUFS4,NDUFS5,NDUFS6,NDUFS7,NDUFS8,NDUFV1,NDUFV2,NDUFV3,NUBPL,OXA1L,SAMM50,SDHAF1,SLC25A33,T…	Human
NCB-CB	_tstat	within each collection	BP: GO biological process	GO_NEGATIVE_REGULATION_OF_PROTEIN_SECRETION	0.000491	0.00530695	-0.382395	-1.73388	0	85	NR1H3,BANK1,LILRB1,IL10,KCNB1,SRGN,ANXA4,ACVR1C,IL33,SIRT4,PTPN22,GBP1,HADH,SLAMF1,IL1B,BTN2A2,PTGER3,PDE4C,TNFRSF9,NLRP3,FOXP3,PIM3,PML,RSAD2,TMBIM6,NOS1,ANGPT1,ERP29,ZC3H12A,PPP3CA,CX3CL1,TNF,PTGER4,DRD2,C1QTNF3,PTPN11,LGR4,TNFRSF21	38	0.447059	ACVR1C,ADRA2A,ANGPT1,ANXA1,ANXA4,ANXA5,APOA1,APOA2,BANK1,BMP8A,BTN2A2,C1QTNF3,CD34,CX3CL1,DPH3,DRD2,DRD4,ENY2,ERP29,EZR,F2R,F2RL1,FBLN1,FKBP1B,FN1,FOXP3,GAS6,GBP1,HADH,HMGCR,IL10,IL1B,IL33,IL6,INHBB,IRS1,KCNB1,KCNJ11,LGR4,LILRB1,MIDN,NDUFAF2,NLRP12,NLRP3,NOS1,NR1H3,NR1H4,PDE4C,PDE8B,PFKL,PIM3,PML,PPP3CA,PSMD9,PTGER3,PTGER4,PTPN11,PTPN22,RAB11FIP1,RAB11FIP3,RAB11FIP5,RABGEF1,REST,RHBDF1,RHBDF2,RSA…	Human
NCB-CB	_tstat	within each collection	BP: GO biological process	GO_REGULATION_OF_CALCIUM_ION_TRANSPORT_INTO_CYTOSOL	0.000486	0.00530695	-0.388286	-1.73315	0	78	CAMK2D,P2RX5,P2RX4,CD4,GSTO1,FCRL5,CAPN3,CLIC2,CXCL11,JPH3,CASQ1,MYO5A,P2RX7,CALM3,P2RX3,CORO1A,GSTM2,LYN,AKAP5,CAV1,JSRP1,TRDN,CXCL9,PTPN6,BAK1,PML,CYBA,NOS1,PRKACA,PTK2B,SLC8A1,CXCR3,CXCL10,BMP4,PDPK1,EPO,PDE4D,HRC,HAP1,BAX,TRPC3,XCL1	42	0.538462	ABL1,ADCYAP1R1,AKAP5,AKAP6,ANK2,ASPH,ATG5,ATP1A2,BAK1,BAX,BCL2,BMP4,CACNA1C,CALM1,CALM2,CALM3,CAMK2D,CAPN3,CASQ1,CASQ2,CAV1,CD4,CLIC2,CORO1A,CXCL10,CXCL11,CXCL9,CXCR3,CYBA,DIAPH1,DMD,DRD1,EDNRA,EPO,F2,F2R,F2RL3,FCRL5,FKBP1A,FKBP1B,GSTM2,GSTO1,HAP1,HRC,HTT,JPH1,JPH2,JPH3,JPH4,JSRP1,LYN,MYO5A,NOS1,P2RX3,P2RX4,P2RX5,P2RX7,PDE4D,PDPK1,PKD2,PLCG1,PLN,PML,PRKACA,PRKCE,PRKD1,PTK2B,PTPN6,RYR2,SLC8A1,SNCA…	Human
NCB-CB	_tstat	within each collection	BP: GO biological process	GO_REGULATION_OF_IMMUNOGLOBULIN_PRODUCTION	0.00225022	0.0133234	-0.44317	-1.73038	4	41	CD40,HLA-E,IL4R,CD28,IL10,IL27RA,TBX21,IL33,SASH3,XBP1,CD40LG,TNFRSF4,FOXP3,MZB1,STAT6,STX4,TMBIM6,TNF,IFNG,PAXIP1	20	0.487805	APLF,BCL6,CD28,CD40,CD40LG,CLCF1,EXOSC3,FOXP3,HLA-E,HPX,IFNG,IL10,IL13RA2,IL27RA,IL33,IL4R,IL6,MSH6,MZB1,NDFIP1,PAXIP1,PKN1,PRKDC,RBP4,SASH3,STAT6,STX4,SUPT6H,TBX21,THOC1,TMBIM6,TNF,TNFRSF4,TNFSF13,TNFSF4,TRAF2,TRAF6,UNG,VAMP3,XBP1,XCL1	Human
NCB-CB	_tstat	within each collection	BP: GO biological process	GO_DRUG_TRANSMEMBRANE_TRANSPORT	0.0109361	0.0452269	-0.566843	-1.72982	24	16	ATP8B1,SLC22A3,SLC22A5,ABCG2,EBP,ABCB1,ABCB4,SLC22A18,TMEM30A	9	0.5625	ABCA8,ABCB1,ABCB4,ABCB5,ABCC2,ABCG2,ATP8B1,EBP,SLC17A3,SLC22A1,SLC22A18,SLC22A3,SLC22A5,SLC31A1,SLC47A1,TMEM30A	Human
NCB-CB	_tstat	within each collection	BP: GO biological process	GO_POSITIVE_REGULATION_OF_INTERLEUKIN_2_PRODUCTION	0.00762674	0.0344001	-0.484968	-1.72944	16	29	PRKCQ,CD28,CARD11,CD86,CD4,SASH3,CD80,RIPK2,IL1B,CD3E,CCR2,IRF4	12	0.413793	ABL1,ANXA1,CARD11,CCR2,CD276,CD28,CD3E,CD4,CD80,CD83,CD86,GLMN,IL1B,IRF4,MALT1,MAP3K7,PDE4B,PDE4D,PRKCQ,PRKD2,RIPK2,RUNX1,SASH3,SPTBN1,STAT5B,TNFSF4,TRAF2,TRAF6,VTCN1	Human
NCB-CB	_tstat	within each collection	BP: GO biological process	GO_NEGATIVE_REGULATION_OF_NF_KAPPAB_IMPORT_INTO_NUCLEUS	0.0109361	0.0452269	-0.566358	-1.72834	24	16	CYLD,IL10,PPM1B,FBXW11,CCDC22,NFKBIB,NLRP3,NFKBIA,ZC3H12A,C1QTNF3	10	0.625	BMP7,C1QTNF3,CCDC22,CYLD,FAF1,FBXW11,G3BP2,IL10,LITAF,NFKBIA,NFKBIB,NLRP3,PPM1A,PPM1B,PSMD10,ZC3H12A	Human
NCB-CB	_tstat	within each collection	BP: GO biological process	GO_POSITIVE_REGULATION_OF_RESPONSE_TO_EXTERNAL_STIMULUS	0.000611	0.00532127	-0.319178	-1.72505	0	265	ZC3HAV1,GPSM3,TIAM1,CLOCK,CCR1,C3AR1,RAB12,VAMP8,TNIP1,CD74,VEGFC,CCL4L2,CCL24,CD28,CCL3,IL15,CSF1,LY96,SMAD3,CD180,C5AR1,DHX58,NCKAP1L,AIF1,LTA,VAMP7,HAVCR2,IL17RA,FCER1G,TIRAP,CMKLR1,IL33,TLR4,NOD2,RAC2,TNFRSF11A,ETS1,ANO6,RIPK2,PIP4K2A,CXCL11,GBP5,JAK2,IL17RC,TLR2,IL1B,CCR7,IL18,CD6,ADAM10,RALB,MAPK3,PIK3CG,CCL8,DDX60,DAPK2,PTGER3,XCL2,IL16,CCR2,THBS4,CCL4,IL6R,CCL21,TNFRSF1A,PINK1,TLR7,AGER,T…	106	0.4	ADAM10,ADAM17,ADAM8,ADORA2B,ADRB2,AGER,AGT,AGTR1,AIF1,AKT2,AMBRA1,ANKRD17,ANO6,APOH,ARTN,ATG5,ATG7,BECN1,BMP6,BMPR2,BNIP3,BNIP3L,BRAF,C1QBP,C3,C3AR1,C5AR1,CALCOCO2,CALR,CAMK1D,CCL11,CCL13,CCL14,CCL15,CCL16,CCL18,CCL19,CCL2,CCL21,CCL23,CCL24,CCL3,CCL4,CCL4L2,CCL5,CCL7,CCL8,CCR1,CCR2,CCR6,CCR7,CD180,CD28,CD47,CD6,CD74,CDH13,CDK19,CLOCK,CMKLR1,CNR1,CNTF,CPB2,CREB3,CREB3L3,CSF1,CX3CL1,CXCL1,CXCL10,CX…	Human
NCB-CB	_tstat	within each collection	BP: GO biological process	GO_MEMBRANE_INVAGINATION	0.00274474	0.0154643	-0.434136	-1.72281	5	44	FCHO2,ELMO1,AIF1,BIN2,VAMP7,IGLL5,FCER1G,TRDC,IGLC1,ABCA1,IGHG1,IGHG4,IGLC3,FCGR1A,IGKC,IGLC2,ATG9A,XKR8,IGHV3-23,SMURF1,IGHG2,CHMP4A	22	0.5	ABCA1,AIF1,ATG7,ATG9A,ATG9B,BECN1,BIN2,CHMP2A,CHMP4A,DOCK1,ELMO1,FCER1G,FCGR1A,FCHO2,FNBP1L,GSN,GULP1,HGS,IGHA1,IGHA2,IGHD,IGHE,IGHG1,IGHG2,IGHG3,IGHG4,IGHM,IGHV3-23,IGKC,IGLC1,IGLC2,IGLC3,IGLC7,IGLL5,MFGE8,MYH9,RAC1,SMURF1,SNX3,THBS1,TRDC,TREM2,VAMP7,XKR8	Human
NCB-CB	_tstat	within each collection	BP: GO biological process	GO_GRANULOCYTE_MIGRATION	0.00142993	0.00945686	-0.403323	-1.72187	2	62	VAV1,CCL4L2,CCL24,CCL3,C5AR1,NCKAP1L,IL17RA,FCER1G,ITGB2,IL17RC,IL1B,CKLF,PIK3CG,CCL8,CSF3R,DAPK2,XCL2,CCL4,IRAK4,CCL7,CCL5,CCL23,S100A9,CX3CL1,CCL13,CCL18,TREM1,IFNG,HRH1,PDE4B,PIK3CD,PDE4D,SCG2,CCL14,S100A8,XCL1	36	0.580645	ANXA1,C5AR1,CCL11,CCL13,CCL14,CCL15,CCL16,CCL18,CCL2,CCL20,CCL22,CCL23,CCL24,CCL3,CCL4,CCL4L2,CCL5,CCL7,CCL8,CKLF,CSF3R,CX3CL1,CXADR,CXCL3,CXCR2,DAPK2,EDN1,EDN2,EDN3,FCER1G,GBF1,HRH1,IFNG,IL17RA,IL17RC,IL1B,IRAK4,ITGA1,ITGA9,ITGB2,JAGN1,LGALS3,NCKAP1L,PDE4B,PDE4D,PIK3CD,PIK3CG,PIP5K1C,PPBP,PREX1,S100A8,S100A9,SAA1,SCG2,SYK,TGFB2,TREM1,VAV1,VAV3,VEGFA,XCL1,XCL2	Human
NCB-CB	_tstat	within each collection	BP: GO biological process	GO_REGULATION_OF_INTERLEUKIN_2_PRODUCTION	0.00275989	0.0154688	-0.430933	-1.71859	5	45	PRKCQ,CD28,CARD11,CD86,HAVCR2,CD4,GBP1,SASH3,CD80,RIPK2,IL1B,SFTPD,CD3E,CCR2,LAG3,IRF4,FOXP3	17	0.377778	ABL1,ANXA1,CARD11,CARD9,CCR2,CD276,CD28,CD34,CD3E,CD4,CD80,CD83,CD86,EZR,FOXP3,GATA3,GBP1,GLMN,HAVCR2,HDAC7,IL1B,IL20RB,IRF4,KAT5,LAG3,MALT1,MAP3K7,PDE4B,PDE4D,PRKCQ,PRKD2,PRNP,RIPK2,RUNX1,SASH3,SFTPD,SPTBN1,STAT5B,TNFAIP3,TNFSF4,TRAF2,TRAF6,TRIM27,VTCN1,XCL1	Human
NCB-CB	_tstat	within each collection	BP: GO biological process	GO_G_PROTEIN_COUPLED_PURINERGIC_RECEPTOR_SIGNALING_PATHWAY	0.010582	0.0441008	-0.536616	-1.71765	23	19	P2RY6,GPR34,ADORA2A,P2RY11,P2RY8,P2RY12,P2RY10,PTAFR,P2RY13,GPR171,P2RY1,P2RY14,GNAI2,ADORA3	14	0.736842	ADCY5,ADORA1,ADORA2A,ADORA2B,ADORA3,GNAI2,GPR171,GPR34,GPR87,P2RY1,P2RY10,P2RY11,P2RY12,P2RY13,P2RY14,P2RY2,P2RY6,P2RY8,PTAFR	Human
NCB-CB	_tstat	within each collection	BP: GO biological process	GO_REGULATION_OF_INTERLEUKIN_1_PRODUCTION	0.00187178	0.0115083	-0.422865	-1.71328	3	49	GSDMD,AIM2,CCL3,ACP5,IL10,SMAD3,HAVCR2,CASP1,TLR4,NOD2,IFNAR1,JAK2,CCR7,P2RX7,CCR2,NLRP3,PYCARD,ARRB2,PML,IFI16,LGALS9,ZC3H12A,TNFAIP3,PTGER4,CCL19,IFNG	26	0.530612	ACP5,AIM2,ANXA1,APOA1,ARRB2,CARD8,CASP1,CCL19,CCL20,CCL3,CCR2,CCR7,ERRFI1,F2R,FOXP1,GAS6,GSDMD,GSTP1,HAVCR2,HDAC2,HMGB1,HSPB1,IFI16,IFNAR1,IFNG,IL10,JAK2,LGALS9,MEFV,NLRP1,NLRP12,NLRP2,NLRP3,NOD1,NOD2,P2RX7,PANX1,PML,PTGER4,PYCARD,S1PR3,SAA1,SMAD3,SPHK1,TLR4,TNFAIP3,TRIM16,WNT5A,ZC3H12A	Human
NCB-CB	_tstat	within each collection	BP: GO biological process	GO_REGULATION_OF_PLASMA_LIPOPROTEIN_PARTICLE_LEVELS	0.0032022	0.0172886	-0.431204	-1.71117	6	44	DGAT1,MPO,EHD1,SOAT1,PLTP,ABCG1,ABCA1,CETP,CD36,HMOX1,ACSL3,MSR1,LIPC,ABCA7,LMF1,LDLRAP1,SCARB1,APOC1,APOE,AGTR1	20	0.454545	ABCA1,ABCA5,ABCA7,ABCG1,ACSL3,ADIPOQ,AGT,AGTR1,APOA1,APOA2,APOA4,APOA5,APOB,APOC1,APOC2,APOC3,APOE,APOM,ARF1,CD36,CETP,DGAT1,DGAT2,EHD1,HMOX1,LCAT,LDLR,LDLRAP1,LIPC,LIPG,LMF1,LPCAT3,LPL,LRP6,MPO,MSR1,MTTP,PLA2G2A,PLA2G7,PLAGL2,PLTP,SCARB1,SOAT1,VLDLR	Human
NCB-CB	_tstat	within each collection	BP: GO biological process	GO_NEGATIVE_REGULATION_OF_NF_KAPPAB_TRANSCRIPTION_FACTOR_ACTIVITY	0.00191755	0.0117673	-0.407749	-1.71082	3	58	PARP10,ARRB1,AIM2,CYLD,TRIM21,IRAK2,ANXA4,HAVCR2,RWDD3,CMKLR1,NLRC5,ITCH,MAP2K5,NLRC3,NFKBIL1,NLRP3,PYCARD,FOXP3,PKHD1,NFKBIA,DAP,ARRB2,GFI1,UFL1,TRAF3,DNAJA3,ZC3H12A,TNFAIP3,CYP1B1	29	0.5	AIM2,ANXA4,ARRB1,ARRB2,BMP7,BRMS1,CAT,CDK5RAP3,CDKN2A,CMKLR1,COMMD1,COMMD6,COMMD7,CYLD,CYP1B1,DAB2IP,DAP,DNAJA3,FOXJ1,FOXP3,GFI1,HAVCR2,IRAK1,IRAK2,IRAK3,ITCH,KLF4,MAP2K5,NFKBIA,NFKBIL1,NLRC3,NLRC5,NLRP12,NLRP3,PARP10,PELI1,PIAS4,PKHD1,PRMT2,PSMD10,PTGIS,PYCARD,RBCK1,RWDD3,SETD6,SIRT1,SIVA1,TAX1BP1,TCEAL7,TLR9,TNFAIP3,TRAF3,TRIM21,TRIM37,UFL1,USP7,ZC3H12A,ZNF675	Human
NCB-CB	_tstat	within each collection	BP: GO biological process	GO_MYELOID_LEUKOCYTE_MEDIATED_IMMUNITY	0.0040395	0.0207691	-0.446476	-1.70993	8	38	SNAP23,ACE,LAT2,VAMP8,RASGRP1,CCL3,MILR1,LAT,VAMP7,PI4K2A,SERPINB9,PIK3CG,S100A13,IL6R,LYN,IRAK4	16	0.421053	ACE,ADAM17,ANXA3,CAMK4,CCL3,CHGA,CPLX2,CTSG,CXCL5,CXCL6,GATA2,IL6,IL6R,IRAK4,JAGN1,KIT,LAT,LAT2,LYN,MILR1,NR4A3,PI4K2A,PIK3CD,PIK3CG,PLA2G3,PPBP,RASGRP1,S100A13,SERPINB9,SNAP23,SPON2,STXBP2,STXBP3,TREM1,TUSC2,VAMP2,VAMP7,VAMP8	Human
NCB-CB	_tstat	within each collection	BP: GO biological process	GO_MAST_CELL_ACTIVATION	0.0114638	0.0469292	-0.534082	-1.70954	25	19	SNAP23,LAT2,RASGRP1,MILR1,LAT,FCER1G,PIK3CG,S100A13,LCP2,LYN,RHOH	11	0.578947	CHGA,CPLX2,FCER1G,GATA2,KIT,LAT,LAT2,LCP2,LYN,MILR1,NDRG1,NR4A3,PIK3CD,PIK3CG,PLA2G3,RASGRP1,RHOH,S100A13,SNAP23	Human
NCB-CB	_tstat	within each collection	BP: GO biological process	GO_POSITIVE_REGULATION_OF_OSTEOCLAST_DIFFERENTIATION	0.0114638	0.0469292	-0.533965	-1.70916	25	19	TMEM64,CCR1,CSF1,CSF1R,SLC9B2,CCL5,IL23A,PPARGC1B,TNF,TNFSF11,IFNG,KLF10,CA2	13	0.684211	ATP6AP1,CA2,CCL5,CCR1,CREB1,CSF1,CSF1R,FOS,GNAS,GPR68,IFNG,IL23A,KLF10,PPARGC1B,SLC9B2,TMEM64,TNF,TNFSF11,TRAF6	Human
NCB-CB	_tstat	within each collection	BP: GO biological process	GO_REGULATION_OF_CALCIUM_ION_TRANSPORT	0.000566	0.00532009	-0.334615	-1.70887	0	174	CACNA2D4,CAMK2D,KCNE3,CCR1,LILRB1,BEST1,FMR1,P2RX5,CCL3,P2RX4,NOS3,CD4,CD84,GSTO1,CAMK2G,FCRL5,CAPN3,CLIC2,CXCL11,JPH3,CASQ1,SUMO1,MYO5A,LILRB2,P2RY12,TRPV3,P2RX7,CALM3,P2RX3,PIK3CG,CORO1A,P2RX1,EGF,PTGER3,CACNA2D1,CCL4,GSTM2,CAMK2A,LYN,ORAI1,MYLK,AKAP5,CAV1,STIM1,JSRP1,TRDN,CXCL9,CCL5,ARRB2,JAK3,GRIN3B,PTPN6,BAK1,CAMK2B,PML,CYBA,NOS1,PRKACA,TRPC6,PTK2B,S100A1,SLC8A1,DRD2,CXCR3,SPINK1,CXCL10,BMP4…	87	0.5	ABL1,ADCYAP1R1,ADRA2A,ADRB2,AGT,AHNAK,AKAP5,AKAP6,ANK2,ARRB2,ASPH,ATG5,ATP1A2,ATP1B1,ATP2B2,BAK1,BAX,BCL2,BEST1,BMP4,CACNA1B,CACNA1C,CACNA1D,CACNA2D1,CACNA2D3,CACNA2D4,CACNB1,CACNB2,CACNB3,CACNB4,CALM1,CALM2,CALM3,CAMK2A,CAMK2B,CAMK2D,CAMK2G,CAPN3,CASK,CASQ1,CASQ2,CAV1,CCL2,CCL3,CCL4,CCL5,CCR1,CD4,CD84,CLDN16,CLIC2,CORO1A,CREB3,CRHR1,CTNNB1,CXCL10,CXCL11,CXCL12,CXCL9,CXCR3,CXCR4,CYBA,DIAPH1,DMD,D…	Human
NCB-CB	_tstat	within each collection	BP: GO biological process	GO_POSITIVE_REGULATION_OF_PROTEIN_SECRETION	0.000565	0.00532009	-0.334332	-1.70738	0	173	TNFRSF14,GSDMD,PRKCQ,ARRB1,HLA-E,CD274,GOLPH3,AIM2,IL4R,BLK,VEGFC,RASGRP1,CCL3,MCU,CD58,IL10,SEC24A,HAVCR2,IL17RA,MAPK14,CSF1R,CRTAM,IL33,FGR,CASP1,GIPR,PTPN22,NOD2,HTR2B,IFNAR1,FCN1,CFTR,TRPM2,JAK2,IL17RC,SLAMF1,IL1B,XBP1,CD14,P2RX7,BAD,C2CD2L,GLUD1,CCR2,TNFRSF4,MAPK11,NLRP3,ACHE,PYCARD,ADAM8,CD38	51	0.294798	AACS,ABAT,ABL1,ACHE,ADAM8,ADAM9,AGTR2,AIM2,ALOX15B,ANG,ANO1,APBB1,ARF1,ARRB1,ATP13A2,BAD,BLK,BMP6,C1QTNF3,C2CD2L,C5,CADM1,CAPN10,CARD8,CASP1,CCL19,CCL3,CCR2,CD14,CD2,CD244,CD274,CD276,CD34,CD38,CD58,CFTR,CLEC4E,CLEC5A,CLEC6A,CRTAM,CSF1R,DNM1L,DOC2B,DRD2,EP300,EXOC1,EXPH5,EZR,F2R,F2RL1,FCN1,FGA,FGB,FGG,FGR,GATA3,GCK,GIPR,GJA1,GLMN,GLUD1,GLUL,GOLPH3,GOLPH3L,GPLD1,GPR27,GPR68,GSDMD,HAVCR2,HCAR2,HIF1…	Human
NCB-CB	_tstat	within each collection	BP: GO biological process	GO_RESPONSE_TO_INTERLEUKIN_1	0.00100553	0.00710257	-0.3653	-1.70382	1	99	MAPK9,NFKB1,PSMB9,IL1RL2,CCL4L2,CCL24,MYD88,IRAK2,CCL3,NKX3-1,TNFRSF11A,ETS1,RIPK2,HSPA9,HNMT,HYAL3,MAPK3,YY2,CCL8,PTGER3,XCL2,CCL4,CCL21,PYCARD,CCL7,CD38,RPS6KA4,CCL5,CCL23,IGBP1,RELA,LGALS9,CYBA,FAS,ZC3H12A,EGR1,CX3CL1,PTGER4,CCL13,PPP4C,CCL18,CCL19	42	0.424242	ADAMTS12,ADAMTS7,ANXA1,BYSL,CCL11,CCL13,CCL14,CCL15,CCL16,CCL18,CCL19,CCL2,CCL20,CCL21,CCL22,CCL23,CCL24,CCL3,CCL4,CCL4L2,CCL5,CCL7,CCL8,CD38,CEBPB,CHI3L1,CREBBP,CX3CL1,CYBA,DAB2IP,EDN1,EGR1,EPO,ETS1,FAS,FGB,FN1,HAS2,HDAC4,HIF1A,HNMT,HSPA9,HYAL1,HYAL2,HYAL3,ICAM1,IGBP1,IKBKB,IL1R1,IL1RL2,IL6,IRAK1,IRAK2,IRAK3,KLF2,LGALS9,MAPK3,MAPK9,MTHFR,MYD88,MYLK3,NFKB1,NKX3-1,OTUB1,P2RY2,PAWR,PLCB1,PPP4C,PRKC…	Human
NCB-CB	_tstat	within each collection	BP: GO biological process	GO_POSITIVE_REGULATION_OF_LYMPHOCYTE_MIGRATION	0.009839	0.041795	-0.495041	-1.70108	21	25	TNFRSF14,CCL3,AIF1,ITGA4,ADAM10,CCR2,CCL4,CCL21,PYCARD,CCL7,ADAM8,TNFSF14,CCL5,CXCL13,PTK2B,CXCL10	16	0.64	ADAM10,ADAM17,ADAM8,AIF1,CCL20,CCL21,CCL3,CCL4,CCL5,CCL7,CCR2,CXCL10,CXCL12,CXCL13,CXCL14,FADD,ITGA4,PTK2B,PYCARD,S100A7,TMEM102,TNFRSF14,TNFSF14,WNT5A,XCL1	Human
NCB-CB	_tstat	within each collection	BP: GO biological process	GO_LEUKOCYTE_HOMEOSTASIS	0.00240038	0.0140377	-0.409865	-1.69645	4	55	CASP3,SLC40A1,TNFRSF13B,LAT,NCKAP1L,GPR174,TNFRSF17,FLT3,RIPK3,SLC39A3,RAG1,MEF2C,PPP2R3C,P2RX7,IL2RA,CORO1A,CACNA1F,LYN,FOXP3,TNFSF14,JAK3,BAK1,FAS,DNAJA3,STAT5B,TNFAIP3,HCAR2,IFNG	28	0.509091	ABL1,AKT1,ANXA1,BAK1,BAX,BCL2,BCL2L11,CACNA1F,CASP3,CCNB2,CORO1A,DNAJA3,FADD,FAS,FLT3,FOXN1,FOXP3,GAPT,GPR174,HCAR2,HIF1A,HMGB1,IFNG,IL2RA,IL6,JAK3,JAM3,LAT,LYN,MEF2C,MTHFD1,NCKAP1L,P2RX7,PDE4B,PKN1,PMAIP1,PPP2R3C,PPP3CB,RAG1,RC3H1,RC3H2,RIPK3,RPS6,SIVA1,SKIL,SLC39A3,SLC40A1,SOS1,STAT5B,TNFAIP3,TNFRSF13B,TNFRSF13C,TNFRSF17,TNFSF14,ZC3H8	Human
NCB-CB	_tstat	within each collection	BP: GO biological process	GO_RESPONSE_TO_ELECTRICAL_STIMULUS	0.00715563	0.0328712	-0.459341	-1.69405	15	33	PSMB9,NTRK1,AIF1,BRD1,EEF1A2,CD14,P2RX7,S100A13,MYOG,TACR2,AKAP5,TACR1,KCNJ3	13	0.393939	ADSS,ADSSL1,AIF1,AKAP5,BRD1,BTG2,CD14,CDK2,DISC1,EEF1A2,EPO,GJB6,GRM1,HIF1A,HNRNPD,IGF1,IL6,KCNJ3,MYOG,NRF1,NTRK1,P2RX7,PALM,PPARGC1A,PSMB9,RAB3A,REST,RPS6KB1,S100A13,SLC9A1,SRC,TACR1,TACR2	Human
NCB-CB	_tstat	within each collection	BP: GO biological process	GO_GENERATION_OF_PRECURSOR_METABOLITES_AND_ENERGY	0.000609	0.00532127	-0.313423	-1.69211	0	258	IDH3A,SDHD,NDUFAF1,SDHA,HK3,COX5A,TAZ,FASTKD3,UQCR11,NDUFS7,HKDC1,NDUFA1,NDUFV3,ALDH5A1,SUCLG1,UQCRB,DLD,ETFA,PYGL,CYC1,ENO3,GIPR,SLC25A4,COX6C,COX7A2L,NR1D1,ME3,MDH1,MTFR1,UQCR10,SCO2,PHKB,COX6B1,NDUFAB1,PPP1R3C,SUCLG2,UQCRFS1,CHCHD10,CALM3,PGM2,PHKA1,SDHB,UQCRC2,NDUFB11,KL,UQCRQ,NDUFA6,MCHR1,PINK1,ADPGK,NDUFA10,RUNX1T1,GYG2,NDUFS6,NDUFB10,PYGM,FXN,NDUFS4,NDUFS1,COX4I1,GYG1,CROT,NDUFB3,PHKG2,PDH…	103	0.399225	ACADVL,ACO1,ACO2,ACOX1,ACSM1,ADIPOQ,ADPGK,AGL,AK2,AKT1,AKT2,ALDH5A1,ALDOA,ALDOB,ALDOC,AQP7,AVPR1A,BAX,BLOC1S1,BPGM,CALM1,CALM2,CALM3,CAT,CEBPA,CHCHD10,CHCHD5,COQ9,COX10,COX15,COX17,COX19,COX4I1,COX5A,COX5B,COX6A1,COX6B1,COX6C,COX7A1,COX7A2L,COX7B,COX7C,COX8A,CPS1,CROT,CS,CYB561,CYB5R4,CYC1,CYCS,CYP1A2,DHTKD1,DLAT,DLD,DLST,ENO1,ENO2,ENO3,ENO4,ENPP1,EPM2A,ETFA,ETFB,ETFDH,FASTKD1,FASTKD2,FASTKD3,FAS…	Human
NCB-CB	_tstat	within each collection	BP: GO biological process	GO_REGULATION_OF_MULTI_ORGANISM_PROCESS	0.000693	0.00544918	-0.299278	-1.69029	0	396	B2M,APOBEC3D,APOBEC3G,PARP10,TRIM25,ZC3HAV1,TRIB1,TAP2,MICB,OAS1,HERC5,AIM2,LILRB1,TNIP1,TRIM21,BIRC3,CD28,NLRX1,REP15,CCL3,FAM111A,BST2,SIGIRR,TAP1,MPO,IL15,HLA-A,CD163L1,TRIM31,MDFIC,IL10,ELMO1,LY96,CD180,DHX58,C19orf66,FCER2,LTA,IRF8,HAVCR2,APOBEC3F,MX1,PPIB,TIRAP,CD4,SLC35B3,POLR2E,IFITM1,MID2,OAS3,ACVR1C,ADA,PPM1B,PRDX4,OVGP1,EIF2AK2,CD247,AP2A2,TRIM14,CHD1,LCK,DOCK2,AP1S2,ARHGDIB,IL12RB1,FC…	146	0.368687	ACIN1,ACVR1B,ACVR1C,ADA,ADAR,ADARB1,AIM2,ALKBH5,ALPK1,ANKRD17,ANXA5,AP1B1,AP1G1,AP1M1,AP1M2,AP1S1,AP1S2,AP1S3,AP2A1,AP2A2,AP2B1,AP2M1,AP2S1,APCS,APOBEC3A,APOBEC3C,APOBEC3D,APOBEC3F,APOBEC3G,APOE,ARF1,ARHGDIB,ASB2,ATP1B1,ATP6V1H,AURKA,B2M,B4GALT1,BAD,BCL2,BCL2L11,BIRC2,BIRC3,BMP6,BST2,BTBD17,C19orf66,C1orf210,C1QBP,CACNA1H,CAV1,CAV2,CCDC36,CCL3,CCL4,CCL5,CCNK,CCNT1,CCR2,CD163L1,CD180,CD247,CD28,CD…	Human
NCB-CB	_tstat	within each collection	BP: GO biological process	GO_REGULATION_OF_B_CELL_DIFFERENTIATION	0.00984781	0.041795	-0.510208	-1.68959	21	22	ATP11C,BTK,CARD11,NCKAP1L,ZAP70,NFAM1,PPP2R3C,INPP5D,XBP1,CD27,BAD	11	0.5	ATP11C,BAD,BTK,CARD11,CD27,ID2,IKZF3,INHA,INHBA,INPP5D,MMP14,NCKAP1L,NFAM1,PCID2,PPP2R3C,PRDM1,PTPN6,SFRP1,STAT5B,SYK,XBP1,ZAP70	Human
NCB-CB	_tstat	within each collection	BP: GO biological process	GO_NEGATIVE_REGULATION_OF_HOMOTYPIC_CELL_CELL_ADHESION	0.000491	0.00530695	-0.369155	-1.68868	0	89	TNFRSF14,HFE,CASP3,IRF1,CD274,IL4R,TNFAIP8L2,CYLD,LILRB1,CD74,RDX,PDCD1LG2,IL10,HAVCR2,PTPN22,CD300A,ITCH,LILRB2,BTN2A2,SFTPD,PLA2G2D,LAX1,IL2RA,SPN,PTGER3,LAG3,HLX,HLA-G,FOXP3,TIGIT,CTLA4,JAK3,PTPN6,SCGB1A1,LGALS9	35	0.393258	ABAT,ADAMTS18,ADRB2,ANXA1,BCL6,BMP4,BTN2A2,C1QTNF1,CASP3,CD274,CD276,CD300A,CD74,CDKN2A,CEACAM1,CEBPB,CLEC4G,CTLA4,CYLD,DLG1,DTX1,DUSP22,DUSP3,ERBB2,FOXJ1,FOXP3,GLI3,GLMN,GNRH1,HAVCR2,HFE,HLA-DRB1,HLA-DRB5,HLA-G,HLX,HMGB1,IDO1,IHH,IL10,IL20RB,IL2RA,IL4R,IRF1,ITCH,JAK3,LAG3,LAX1,LGALS3,LGALS9,LILRB1,LILRB2,MAD1L1,MARCH7,NDFIP1,NRARP,PAG1,PAWR,PDCD1LG2,PDE5A,PELI1,PLA2G2D,PRKAR1A,PRKCD,PRKG1,PRNP,P…	Human
NCB-CB	_tstat	within each collection	BP: GO biological process	GO_POSITIVE_REGULATION_OF_I_KAPPAB_KINASE_NF_KAPPAB_SIGNALING	0.000563	0.00532009	-0.329909	-1.68554	0	172	CD40,TRIM25,ZC3HAV1,CASP10,PRKCQ,CASP8,APOL3,UNC5CL,TICAM2,BIRC3,MYD88,BST2,TRADD,CARD11,TLR6,TIRAP,MAP3K14,FASLG,MID2,TRIM22,CASP1,TLR4,NOD2,HTR2B,MTDH,RIPK2,SHISA5,TLR2,SHARPIN,IL1B,RHOC,CCDC22,RIPK1,CD27,CCR7,IL18,LTBR,S100A13,TRIM38,TNFSF10,TAB2,CD36,CCL21,TNFRSF1A,PINK1,IRAK4,TLR7,TNFSF14,IKBKG,EDA,EEF1D,HMOX1,PIM2,TRIM5,UBD,TLR3,RELA,LGALS9,IL23A,PRKCB	60	0.348837	ABL1,ADIPOQ,AKAP13,ANKRD17,APOL3,ATP2C1,BCL10,BIRC2,BIRC3,BRD4,BST2,C18orf32,CANT1,CARD11,CARD9,CASP1,CASP10,CASP8,CC2D1A,CCDC22,CCL19,CCL21,CCR7,CD27,CD36,CD40,CFLAR,CHUK,CLEC6A,CTH,CTNNB1,CXXC5,DDRGK1,ECM1,ECT2,EDA,EDA2R,EDAR,EEF1D,F2R,F2RL1,FADD,FASLG,FKBP1A,FLNA,FYN,GJA1,GOLT1B,GPR89A,GPRC5B,GREM1,HMOX1,HTR2B,IKBKB,IKBKE,IKBKG,IL18,IL18R1,IL1B,IL23A,IRAK1,IRAK4,IRF3,LGALS1,LGALS9,LITAF,LPAR1,…	Human
NCB-CB	_tstat	within each collection	BP: GO biological process	GO_POSITIVE_REGULATION_OF_NF_KAPPAB_IMPORT_INTO_NUCLEUS	0.0116279	0.047361	-0.489745	-1.68288	25	25	PRKCQ,TLR4,TLR2,IL1B,CD27,IL18,TLR7,TNFSF14,EDA,TLR3,LGALS9,IL23A,TNF,CCL19,EDAR	15	0.6	CCL19,CD27,EDA,EDAR,GREM1,IL18,IL18R1,IL1B,IL23A,LGALS9,NLRP12,PRKCQ,PTGS2,RBCK1,RHOA,SPHK1,TLR2,TLR3,TLR4,TLR7,TLR9,TNF,TNFSF14,TRIP6,ZNF268	Human
NCB-CB	_tstat	within each collection	BP: GO biological process	GO_INNATE_IMMUNE_RESPONSE_ACTIVATING_CELL_SURFACE_RECEPTOR_SIGNALING_PATHWAY	0.00100807	0.00710257	-0.359217	-1.68029	1	101	NFKB1,PSMB8,PSMB9,PSME1,PSMB10,ICAM2,PSMA4,CARD11,CLEC4A,FCER1G,CD209,PRKACB,PSMA5,FBXW11,FCN1,UBE2D1,KLRK1,ICAM3,SKP1,TAB2,LYN,PSME2,CLEC7A,IKBKG,NFKBIA,CLEC4C,PSMC2,PSMB2,KLRC4-KLRK1,RELA,PRKACA,RELB,PSMD5,CLEC4E,PSMC6,PSMD1,CARD9,PSMA1,PDPK1,PSMB6,PSMD12	41	0.405941	BCL10,BTRC,CARD11,CARD9,CD209,CHUK,CLEC4A,CLEC4C,CLEC4E,CLEC6A,CLEC7A,CREBBP,CUL1,EP300,FBXW11,FCER1G,FCN1,FYN,HRAS,ICAM2,ICAM3,IKBKB,IKBKG,KLRC4-KLRK1,KLRK1,KRAS,LYN,MALT1,MAP3K7,NFKB1,NFKBIA,NRAS,PAK1,PAK2,PAK3,PDPK1,PLCG2,PRKACA,PRKACB,PRKCD,PSMA1,PSMA2,PSMA3,PSMA4,PSMA5,PSMA6,PSMA7,PSMB1,PSMB10,PSMB2,PSMB3,PSMB4,PSMB5,PSMB6,PSMB7,PSMB8,PSMB9,PSMC1,PSMC2,PSMC3,PSMC4,PSMC5,PSMC6,PSMD1,PSMD10,PS…	Human
NCB-CB	_tstat	within each collection	BP: GO biological process	GO_REGULATION_OF_ACTIVATED_T_CELL_PROLIFERATION	0.00947653	0.0405922	-0.456734	-1.66946	20	32	CASP3,CD274,PDCD1LG2,CD86,IL12RB1,RIPK3,SLAMF1,BTN2A2,IL18,IL2RA,AGER,PYCARD,FOXP3,JAK3,LGALS9,IL23A,STAT5B,TNFSF9,FADD,EPO	20	0.625	AGER,BTN2A2,CASP3,CD24,CD274,CD86,EPO,FADD,FOXP3,GPAM,HMGB1,ICOSLG,IDO1,IGF1,IGF2,IGFBP2,IL12RB1,IL18,IL23A,IL2RA,JAK3,LGALS9,PDCD1LG2,PRKAR1A,PRNP,PYCARD,RC3H1,RIPK3,SLAMF1,STAT5B,TNFSF4,TNFSF9	Human
NCB-CB	_tstat	within each collection	BP: GO biological process	GO_FATTY_ACID_METABOLIC_PROCESS	0.000614	0.00532127	-0.310415	-1.66886	0	255	PLA2G4C,MGLL,RNPEPL1,ECHDC2,SESN2,CD74,ALDH5A1,LPIN3,CBR1,HADHB,FABP3,DECR1,ACOT4,CPT1B,TBXAS1,DLD,ETFA,STAT5A,MCAT,MAPK14,FADS3,ACSS2,PRKAA1,IVD,ACSL5,HADHA,GGT1,LIPE,HADH,ABCD1,THNSL2,THEM4,ALOX5,HSD17B12,MYO5A,NDUFAB1,XBP1,ACSM3,SCP2,CRAT,PEX7,MAPK3,PPARG,MCEE,PECR,PTGDS,PTGR1,QKI,ABCD2,TNFRSF1A,FAAH,CYP2U1,ECHS1,CYP4V2,ALOX5AP,NDUFS6,ACADS,PLA2G15,ACOT2,CROT,ACOT1,ACSL3,ACAD11,LIPC,LPIN2,CRYL…	124	0.486275	AACS,AASDH,ABCC1,ABCD1,ABCD2,ABCD3,ABHD5,ACAA1,ACAA2,ACACA,ACACB,ACAD10,ACAD11,ACAD8,ACAD9,ACADL,ACADM,ACADS,ACADSB,ACADVL,ACLY,ACOT1,ACOT11,ACOT12,ACOT2,ACOT4,ACOT7,ACOT8,ACOX1,ACOX2,ACOX3,ACOXL,ACSF2,ACSF3,ACSL1,ACSL3,ACSL4,ACSL5,ACSL6,ACSM1,ACSM2A,ACSM2B,ACSM3,ACSM5,ACSS1,ACSS2,ADIPOQ,ADIPOR1,ADIPOR2,AGMO,AKR1C2,AKR1C3,ALDH3A2,ALDH5A1,ALKBH7,ALOX15B,ALOX5,ALOX5AP,AMACR,ANGPTL3,BAAT,BDH2,BRCA1,…	Human
NCB-CB	_tstat	within each collection	BP: GO biological process	GO_CALCIUM_ION_IMPORT_INTO_CYTOSOL	0.00628648	0.0296363	-0.428104	-1.66667	13	40	IBTK,CCL3,LCK,HTR2B,JPH3,TRPM2,PTPRC,CCR7,P2RX7,CCR5,RYR1,CCL21,TRDN,BBC3,RASA3,DRD2,CCL19,TPCN2,TRPV1	19	0.475	ATP2B4,BBC3,CCL19,CCL21,CCL3,CCR5,CCR7,CHERP,DDIT3,DRD2,F2R,FGF2,FKBP1B,HTR2A,HTR2B,HTR2C,IBTK,ITPR1,ITPR2,ITPR3,JPH2,JPH3,LCK,MCOLN1,P2RX7,PKD2,PLCG2,PRKCE,PTPRC,RASA3,RYR1,RYR2,RYR3,TPCN1,TPCN2,TRDN,TRPA1,TRPM2,TRPV1,XCL1	Human
NCB-CB	_tstat	within each collection	BP: GO biological process	GO_CELL_CHEMOTAXIS	0.00054	0.00530695	-0.335248	-1.66264	0	144	PTPRO,VAV1,PRKCQ,CCR1,CCL4L2,CCL24,CCL3,IL10,SBDS,FOLR2,C5AR1,NCKAP1L,BIN2,IL17RA,FCER1G,ITGB2,TNFRSF11A,ANO6,CXCL11,PLXNB3,IL17RC,IL1B,EDNRB,CCR7,SFTPD,CKLF,CCR5,VCAM1,PIK3CG,CCL8,CORO1A,CSF3R,XCL2,IL16,CCR2,CCL4,IL6R,LYST,CCL21,CCL7,ADAM8,CXCL9,CCL5,CCL23,ARRB2,RHOG,CXCL13,S100A9,CX3CL1,CXCR3,CCL13,CCL18,TNFSF11,CCL19,TREM1,CXCL10,IFNG,NRP1,CCR6,HRH1,CX3CR1,PDE4B,PIK3CD,AGTR1,PDE4D,CXCL12,HBEGF…	74	0.513889	ADAM8,AGTR1,ANO6,ANXA1,ARHGEF16,ARHGEF5,ARRB2,BCAR1,BIN2,C5,C5AR1,CCL11,CCL13,CCL14,CCL15,CCL16,CCL18,CCL19,CCL2,CCL20,CCL21,CCL22,CCL23,CCL24,CCL28,CCL3,CCL4,CCL4L2,CCL5,CCL7,CCL8,CCR1,CCR2,CCR5,CCR6,CCR7,CHGA,CKLF,CORO1A,CORO1B,CSF3R,CX3CL1,CX3CR1,CXADR,CXCL1,CXCL10,CXCL11,CXCL12,CXCL13,CXCL14,CXCL16,CXCL2,CXCL3,CXCL5,CXCL6,CXCL9,CXCR1,CXCR2,CXCR3,CXCR4,DOCK4,EDN1,EDN2,EDN3,EDNRB,EGR3,ELMO2,ENG…	Human
NCB-CB	_tstat	within each collection	BP: GO biological process	GO_REGULATION_OF_RESPONSE_TO_BIOTIC_STIMULUS	0.000581	0.00532009	-0.318859	-1.66253	0	199	B2M,APOBEC3G,ZC3HAV1,TRIB1,MICB,HERC5,AIM2,LILRB1,BIRC3,CD28,NCR3,NLRX1,REP15,SIGIRR,IL15,HLA-A,CD163L1,ELMO1,LY96,CD180,DHX58,HAVCR2,APOBEC3F,CD4,SLC35B3,CRTAM,PPM1B,EIF2AK2,CD247,AP2A2,LCK,DOCK2,AP1S2,IL12RB1,RIPK2,MDH1,KLRK1,ITCH,IFIT1,PPP2R3C,AP1S1,MAPK3,HCK,CD8B,IL2RA,SPN,DDX60,PNPO,NFKBIL1,TRIM38,SIRT2,MYLK,ASB2,LY86,PDK4,PEX3,FANCL,AP1B1,TRIM5,KLRC4-KLRK1,EIF2AK4,PML,SMURF1,CYBA,IL23A,TRAF…	69	0.346734	ACIN1,AIM2,ALKBH5,ALPK1,ANKRD17,ANXA5,AP1B1,AP1G1,AP1M1,AP1M2,AP1S1,AP1S2,AP1S3,AP2A1,AP2A2,AP2B1,AP2M1,AP2S1,APOBEC3F,APOBEC3G,ARF1,ASB2,ATP1B1,ATP6V1H,B2M,BIRC2,BIRC3,BMP6,C1orf210,C1QBP,CCDC36,CD163L1,CD180,CD226,CD247,CD28,CD4,CD55,CD8B,CD93,CHAF1B,CHST3,CLDN7,COX8A,CPA3,CREB3,CRNKL1,CRTAM,CSPG5,CYBA,DDX58,DDX60,DHX58,DNAAF2,DOCK2,DPF3,EIF2AK2,EIF2AK4,EIF2S1,ELMO1,ELMOD2,F2RL1,FABP1,FAM131B,F…	Human
NCB-CB	_tstat	within each collection	BP: GO biological process	GO_REGULATION_OF_VIRAL_GENOME_REPLICATION	0.00242014	0.0141277	-0.38249	-1.66166	4	69	APOBEC3D,APOBEC3G,PARP10,ZC3HAV1,OAS1,TNIP1,CD28,FAM111A,BST2,C19orf66,APOBEC3F,MX1,PPIB,IFITM1,OAS3,EIF2AK2,APOBEC3C,IFIT1,ISG20,TRIM38,PLSCR1,CCL5,ADARB1,RNASEL,EIF2AK4,PABPC1,RSAD2,IFI16,ISG15,ZC3H12A,RAD23A,TNF,IFITM2,OASL,LARP1	35	0.507246	ADAR,ADARB1,APOBEC3A,APOBEC3C,APOBEC3D,APOBEC3F,APOBEC3G,BCL2,BST2,BTBD17,C19orf66,CCL5,CCNK,CD28,DDB1,DDX3X,DDX5,EIF2AK2,EIF2AK4,FAM111A,HMGA2,IFI16,IFIT1,IFITM1,IFITM2,IFITM3,ILF3,INPP5K,ISG15,ISG20,LARP1,LTF,MAVS,MX1,NOTCH1,NR5A2,OAS1,OAS3,OASL,PABPC1,PARP10,PKN2,PLSCR1,PPIA,PPIB,PPID,PPIE,PPIH,PROX1,RAD23A,RNASEL,RSAD2,SLPI,SRPK1,SRPK2,STAU1,STOM,TARBP2,TBC1D20,TNF,TNIP1,TOP2A,TRIM38,TRIM6,VA…	Human
NCB-CB	_tstat	within each collection	BP: GO biological process	GO_COENZYME_METABOLIC_PROCESS	0.0006	0.00532127	-0.31148	-1.65986	0	238	COQ2,AHCYL1,ME1,HK3,SPR,PPCS,MTRR,MAT2B,DGAT1,HKDC1,PCBD1,SUCLG1,ACOT4,QPRT,DLD,MCCC2,PPT2,NADK,NMNAT1,PPCDC,ENO3,KCNAB2,MOCS2,ACSS2,SLC25A32,ACSL5,TALDO1,NMNAT2,ACOT9,PCBD2,COQ7,MOCS1,MDH1,THEM4,SLC5A6,HSD17B12,VNN2,SUCLG2,DHFR,PGM2,MCEE,MRI1,PANK1,TKT,PNPO,CBR3,KYNU,SLC19A1,ADPGK,GCH1,TPK1,MOCOS,AASDHPPT,COASY,RFK,ACOT2,CROT,QDPR,SLC25A1,MTHFS,GAMT,PDHA1,ACOT1,ACSL3,CYB5R4,IDH1,IDH3G,GPD1,KMO,S…	97	0.407563	AADAT,AASDHPPT,AASS,ACACA,ACACB,ACLY,ACOT1,ACOT11,ACOT12,ACOT13,ACOT2,ACOT4,ACOT7,ACOT8,ACOT9,ACSF2,ACSF3,ACSL1,ACSL3,ACSL4,ACSL5,ACSL6,ACSM2A,ACSS1,ACSS2,ADPGK,AFMID,AGK,AHCY,AHCYL1,AHCYL2,ALDH1L1,ALDH1L2,ALDOA,ALDOB,ALDOC,AMD1,APIP,ASPDH,ATIC,BAAT,BHMT,BHMT2,BPGM,CBR3,COASY,COQ2,COQ3,COQ4,COQ5,COQ6,COQ7,COQ9,CROT,CYB5R4,CYP4F11,CYP4F2,DCAKD,DCXR,DERA,DGAT1,DGAT2,DHFR,DHTKD1,DLAT,DLD,DLST,DNMT1,…	Human
NCB-CB	_tstat	within each collection	BP: GO biological process	GO_PTERIDINE_CONTAINING_COMPOUND_METABOLIC_PROCESS	0.009839	0.041795	-0.448281	-1.65326	21	33	SPR,MTRR,PCBD1,SLC25A32,PCBD2,DHFR,SLC19A1,GCH1,QDPR,MTHFS,SARDH	11	0.333333	ALDH1L1,ALDH1L2,ATIC,DHFR,FOLH1,FOLR1,FPGS,FTCD,GART,GCH1,GGH,MTHFD1,MTHFD1L,MTHFD2,MTHFD2L,MTHFR,MTHFS,MTR,MTRR,PAH,PCBD1,PCBD2,PIPOX,PTS,QDPR,SARDH,SHMT1,SHMT2,SLC19A1,SLC25A32,SLC46A1,SPR,TYMS	Human
NCB-CB	_tstat	within each collection	BP: GO biological process	GO_REGULATION_OF_CYSTEINE_TYPE_ENDOPEPTIDASE_ACTIVITY	0.00116686	0.00809792	-0.319113	-1.65304	1	193	MAPK9,PSMB9,XIAP,CASP3,ARRB1,CASP8,AIM2,HTRA2,BIRC3,MAP3K5,TRADD,SMAD3,AIFM1,NKX3-1,HERPUD1,FNIP1,FASLG,TNFAIP8,SIAH2,RPS27L,ACVR1C,CASP7,RPS6KA3,CASP1,SERPINB9,LCK,CRYAB,BCL2L13,JAK2,RAG1,ACER2,RIPK1,CD27,TBC1D10A,MAP2K5,BCL2L12,BAD,PPARG,P2RX1,PRDX3,TNFSF15,TNFSF10,NLRP3,PYCARD,TNFSF14,BID,BCL2L10,NLRC4,DAP,TRIAP1,ARRB2,IGBP1,CTSH,BAK1,PML,PPM1F,DAPK1,IFI16,LGALS9,FAS,BBC3,DNAJA3,S100A9,IFI27,T…	71	0.367876	ACER2,ACVR1C,AIFM1,AIM2,AKT1,AKT2,ANP32B,APAF1,AQP1,ARL6IP1,ARL6IP5,ARRB1,ARRB2,ASPH,BAD,BAK1,BAX,BBC3,BCAP31,BCL10,BCL2L10,BCL2L11,BCL2L12,BCL2L13,BID,BIRC2,BIRC3,BIRC5,BIRC7,BOK,CARD8,CASP1,CASP2,CASP3,CASP7,CASP8,CASP8AP2,CASP9,CD27,CD44,CDKN1B,CDKN2A,CDKN2D,CIDEB,COL4A3,CRADD,CRYAB,CSNK2A1,CTSH,CYCS,CYFIP2,DAP,DAPK1,DDX3X,DHCR24,DIABLO,DLC1,DNAJA3,DNAJB6,DPEP1,EGLN3,EIF2AK3,EP300,EPHA7,F2R,F3…	Human
NCB-CB	_tstat	within each collection	BP: GO biological process	GO_TRANSLATIONAL_TERMINATION	0.00149626	0.00972637	-0.359891	-1.65211	2	91	MRPL36,MRPL13,MRPL39,MRPL16,MRPS36,MRPS18B,MRPL19,MRPS30,MRPL40,MRPL37,MRPL44,MRPL18,MRPS16,MRPL49,MRPL11,MRPS15,MRPL46,MRPS12,MRPL34,MRPS18C,CHCHD1,MRPS6,MRPL14,MRPL53,MRPL35,GFM2,MRPS35,MRPS11,MRPS27,MRPS9,MRPL22	31	0.340659	APEH,AURKAIP1,C12orf65,CHCHD1,DAP3,ETF1,GADD45GIP1,GFM2,GSPT1,GSPT2,MRPL1,MRPL10,MRPL11,MRPL12,MRPL13,MRPL14,MRPL15,MRPL16,MRPL17,MRPL18,MRPL19,MRPL2,MRPL20,MRPL21,MRPL22,MRPL23,MRPL24,MRPL27,MRPL28,MRPL3,MRPL30,MRPL32,MRPL33,MRPL34,MRPL35,MRPL36,MRPL37,MRPL38,MRPL39,MRPL4,MRPL40,MRPL41,MRPL42,MRPL43,MRPL44,MRPL45,MRPL46,MRPL47,MRPL48,MRPL49,MRPL50,MRPL51,MRPL52,MRPL53,MRPL54,MRPL55,MRPL9,MRPS10,…	Human
NCB-CB	_tstat	within each collection	BP: GO biological process	GO_POSITIVE_REGULATION_OF_PROTEOLYSIS	0.000654	0.00538195	-0.297867	-1.64762	0	334	MAPK9,PSMB8,PSMB9,PSME1,TRIB1,CLPX,PSMB10,CASP3,ARRB1,CASP8,ANAPC16,RNF14,AIM2,PIAS1,HTRA2,SNX9,MAP3K5,RAB1A,PSMA4,FMR1,TRADD,RNF125,SMAD3,AIFM1,NKX3-1,RNF139,HERPUD1,DAB2,RNF19B,RNF19A,FASLG,RPS27L,NSMCE2,ACVR1C,CASP7,IL33,PSMA5,CASP1,FBXW11,LCK,SNX33,CAPN3,LRRK2,UBE2D1,TNFRSF1B,BCL2L13,ZFAND2A,FBXO22,JAK2,SUMO1,NUB1,HPN,IL1B,MAPK12,ACER2,XBP1,CBFA2T3,CCDC22,RIPK1,UBQLN2,TBC1D10A,SKP1,CR1,BAD,OG…	124	0.371257	ACER2,ACVR1C,ADAM8,ADAM9,ADRA2A,ADRM1,AIFM1,AIM2,AKIRIN2,AKT1,ANAPC1,ANAPC10,ANAPC11,ANAPC16,ANAPC2,ANAPC4,ANAPC5,ANAPC7,ANKIB1,ANP32B,APAF1,APOE,APP,ARIH1,ARIH2,ARL6IP5,ARRB1,ASPH,AURKA,AURKAIP1,AXIN1,BAD,BAK1,BAX,BBC3,BBS7,BCAP31,BCL10,BCL2L10,BCL2L11,BCL2L13,BID,BOK,BTRC,BUB1B,BUB3,C3,C6,CAPN3,CARD8,CASP1,CASP2,CASP3,CASP7,CASP8,CASP8AP2,CASP9,CAV1,CBFA2T3,CCBE1,CCDC22,CCNB1,CDC16,CDC20,CDC23,…	Human
NCB-CB	_tstat	within each collection	BP: GO biological process	GO_NEGATIVE_REGULATION_OF_LEUKOCYTE_PROLIFERATION	0.00333651	0.0178943	-0.385396	-1.64533	6	62	TNFRSF14,CASP3,CD274,LILRB1,PDCD1LG2,TNFRSF13B,IL10,HAVCR2,CD300A,ITCH,LILRB2,BTN2A2,INPP5D,SFTPD,PLA2G2D,CCL8,IL2RA,SPN,HLA-G,LYN,FOXP3,CTLA4,PTPN6,LST1,SCGB1A1,LGALS9,TNFAIP3,BMP4,PRDM1,TNFRSF21,MNDA	31	0.5	ATM,BMP4,BTN2A2,CASP3,CCL8,CD274,CD276,CD300A,CDKN2A,CEBPB,CLEC4G,CTLA4,DLG1,ERBB2,FOXJ1,FOXP3,GAL,GLMN,GNRH1,GREM1,GSTP1,HAVCR2,HLA-DRB1,HLA-DRB5,HLA-G,IDO1,IHH,IL10,IL20RB,IL2RA,INPP5D,ITCH,LGALS9,LILRB1,LILRB2,LST1,LYN,MAD1L1,MARCH7,MNDA,NDFIP1,PAWR,PDCD1LG2,PDE5A,PELI1,PKN1,PLA2G2D,PRDM1,PRKAR1A,PRNP,PTPN6,RC3H1,SCGB1A1,SFTPD,SHH,SOX11,SPN,TNFAIP3,TNFRSF13B,TNFRSF14,TNFRSF21,XCL1	Human
NCB-CB	_tstat	within each collection	BP: GO biological process	GO_TRANSITION_METAL_ION_HOMEOSTASIS	0.00149775	0.00972637	-0.355772	-1.64404	2	94	B2M,SLC30A5,SLC30A4,XIAP,HFE,ATOX1,SLC40A1,CUTC,TTC7A,SFXN4,LCK,SLC25A28,HMOX2,SCO2,TMC8,ABCG2,CCDC22,IREB2,SLC31A2,STEAP1,SFXN2,EPAS1,SOD1,STEAP2,FXN,SFXN1,HMOX1,ISCU,BDH2,FBXL5,S100A9,SFXN5	32	0.340426	ABCB6,ABCB7,ABCG2,ACO1,ALAS2,APP,ARF1,ATOX1,ATP2C1,ATP7A,ATP7B,B2M,BDH2,BMP6,BTBD9,CCDC22,COMMD1,CP,CUTC,CYBRD1,EIF2AK1,EPAS1,FBXL5,FLVCR1,FTH1,FTL,FXN,GDF2,HAMP,HEPH,HFE,HIF1A,HMOX1,HMOX2,HPX,HYAL2,IREB2,ISCU,LCK,LCN2,LTF,MT2A,MYC,NDFIP1,NEO1,NUBP1,PICALM,PRND,PRNP,S100A8,S100A9,SCARA5,SCO1,SCO2,SFXN1,SFXN2,SFXN3,SFXN4,SFXN5,SLC11A1,SLC11A2,SLC22A17,SLC25A28,SLC25A37,SLC30A1,SLC30A4,SLC30A5,SLC3…	Human
NCB-CB	_tstat	within each collection	BP: GO biological process	GO_POSITIVE_REGULATION_OF_ION_TRANSPORT	0.00116618	0.00809792	-0.316486	-1.6433	1	195	MAPK9,B2M,AHCYL1,SCN1B,HFE,KCNE3,CCR1,VAMP8,P2RX5,CCL3,VAMP7,P2RX4,CTSS,ATP8A1,CD4,RNF207,GLRX,GSTO1,ATP8A2,SGK1,SCN4B,TNFRSF11A,CAPN3,ANO6,CFTR,CXCL11,AMIGO1,FHL1,SUMO1,IL1B,P2RY12,TRPV3,P2RX7,CALM3,P2RX3,P2RX1,CACNA2D1,PTAFR,CCL4,GSTM2,TACR2,CAMK2A,PINK1,AGER,ORAI1,MYLK,AKAP5,CAV1,STIM1,TRDN,CXCL9,CCL5,TRIAP1,ARRB2,JAK3,BAK1,AKAP7,AVPR1A,ABCB4,SGK3,NOS1,PLA2R1,ABCA7,TRPC6,S100A1,P2RY1,DRD2,SGK2…	72	0.369231	ABAT,ABCA7,ABCB4,ABL1,ACTN2,ACTN4,ADCYAP1R1,ADORA1,ADRA2A,ADRB2,AGER,AHCYL1,AKAP5,AKAP6,AKAP7,AKAP9,AKT1,AMIGO1,ANK2,ANK3,ANO6,APOE,ARC,ARF1,ARL6IP1,ARRB2,ASPH,ATP1B1,ATP1B2,ATP1B3,ATP2B2,ATP8A1,ATP8A2,AVPR1A,B2M,BAK1,BAX,BMP4,CACNA1D,CACNA2D1,CACNB2,CALM1,CALM2,CALM3,CAMK2A,CAPN3,CASK,CAV1,CCL2,CCL3,CCL4,CCL5,CCR1,CD4,CFTR,CLDN16,CNKSR3,CNTN1,CREB3,CTSS,CXCL10,CXCL11,CXCL12,CXCL9,CXCR3,CYP4A11,C…	Human
NCB-CB	_tstat	within each collection	BP: GO biological process	GO_CELLULAR_AMINO_ACID_CATABOLIC_PROCESS	0.00152905	0.00988991	-0.348322	-1.64143	2	105	DDO,MTRR,PCBD1,ALDH5A1,CARNS1,DLD,NOS3,MCCC2,HOGA1,IVD,GLUD2,THNSL2,OAT,PPM1K,HNMT,NOS2,GLUD1,ASRGL1,CBS,KYNU,PCYOX1,GOT2,ASL,QDPR,MTHFS,ACAT1,FAH,AMT,KMO,NOS1,BCKDK,SDS,AMDHD1,GCSH,TDO2,CTH,HSD17B10,GOT1,AUH,HMGCL,GCDH,ALDH7A1,ACAD8,DBT,IDO2,GLS2,ALDH1L1	47	0.447619	AADAT,AASS,ABAT,ABHD12,ACAD8,ACADSB,ACAT1,ACMSD,ADO,AFMID,AGXT,AGXT2,AHCY,ALDH1L1,ALDH1L2,ALDH4A1,ALDH5A1,ALDH6A1,ALDH7A1,AMDHD1,AMT,ARG1,ASL,ASPA,ASRGL1,AUH,BCAT1,BCAT2,BCKDHA,BCKDHB,BCKDK,CARNS1,CBS,CDO1,CRYM,CTH,DAO,DBT,DDAH1,DDAH2,DDO,DLD,DLST,DTD1,ENOSF1,FAH,FTCD,GAD1,GCAT,GCDH,GCSH,GLDC,GLS,GLS2,GLUD1,GLUD2,GLUL,GOT1,GOT2,GPT,GPT2,GSTZ1,HAAO,HAL,HDC,HGD,HIBADH,HIBCH,HMGCL,HNMT,HOGA1,HPD,HSD…	Human
NCB-CB	_tstat	within each collection	BP: GO biological process	GO_REGULATION_OF_INTERLEUKIN_8_PRODUCTION	0.00520833	0.0254054	-0.401967	-1.64036	10	51	ARRB1,CD58,IL10,ANXA4,TIRAP,PTPN22,TLR4,NOD2,FCN1,TLR2,IL1B,TLR8,RIPK1,BCL3,MAP2K5,IL6R,TLR7,PYCARD,CD244,TLR3,LGALS9,CD2,TNF,PTGER4	24	0.470588	ADIPOQ,AFAP1L2,ANXA1,ANXA4,APOA2,ARRB1,BCL10,BCL3,CD2,CD244,CD58,CRP,DDIT3,DDX58,F2R,F2RL1,FADD,FCN1,GDF2,HSPA1A,HSPA1B,HYAL2,IL10,IL1B,IL6R,KLF4,LBP,LGALS9,MAP2K5,MAVS,NOD2,OTUD7B,PARK7,PRKD2,PTGER4,PTPN22,PYCARD,RIPK1,SERPINE1,SSC5D,TIRAP,TLR2,TLR3,TLR4,TLR5,TLR7,TLR8,TLR9,TNF,WNT5A,ZNF580	Human
NCB-CB	_tstat	within each collection	BP: GO biological process	GO_REGULATION_OF_INTERLEUKIN_1_BETA_PRODUCTION	0.00898069	0.039037	-0.420841	-1.63839	19	40	GSDMD,AIM2,CCL3,ACP5,SMAD3,CASP1,NOD2,IFNAR1,JAK2,CCR7,P2RX7,CCR2,NLRP3,PYCARD,ARRB2,PML,IFI16,LGALS9,ZC3H12A,TNFAIP3,CCL19,IFNG	22	0.55	ACP5,AIM2,APOA1,ARRB2,CARD8,CASP1,CCL19,CCL3,CCR2,CCR7,ERRFI1,F2R,FOXP1,GSDMD,GSTP1,HMGB1,HSPB1,IFI16,IFNAR1,IFNG,JAK2,LGALS9,MEFV,NLRP1,NLRP12,NLRP2,NLRP3,NOD1,NOD2,P2RX7,PANX1,PML,PYCARD,S1PR3,SMAD3,SPHK1,TNFAIP3,TRIM16,WNT5A,ZC3H12A	Human
NCB-CB	_tstat	within each collection	BP: GO biological process	GO_REGULATION_OF_B_CELL_MEDIATED_IMMUNITY	0.00802139	0.0357809	-0.432183	-1.63469	17	36	CD40,CD28,BTK,IL10,IL27RA,TBX21,FCER2,LTA,FCER1G	9	0.25	APLF,BCL6,BTK,C3,C4BPA,C4BPB,CD226,CD28,CD40,CLCF1,CR1,EXOSC3,FCER1A,FCER1G,FCER2,FOXJ1,FOXP3,HPX,IFNG,IL10,IL27RA,LTA,MSH6,NDFIP1,PAXIP1,PTPN6,STAT6,SUPT6H,SUSD4,TBX21,THOC1,TNF,TNFSF13,TNFSF4,UNG,XCL1	Human
NCB-CB	_tstat	within each collection	BP: GO biological process	GO_ALPHA_BETA_T_CELL_DIFFERENTIATION	0.00945095	0.0405454	-0.418576	-1.63435	20	41	IRF1,TCF7,BATF,ZAP70,ITK,TNFSF8,SATB1,SLAMF6,BCL3,PLA2G2D,EOMES,LY9,IRF4,FOXP3,STAT6,RSAD2,BMX,RELB,PTGER4,IFNG	20	0.487805	ABL1,ANXA1,ATP7A,BATF,BCL11B,BCL2,BCL3,BMX,BRAF,EOMES,FOXP1,FOXP3,FUT7,GATA3,HMGB1,IFNG,IL18R1,IL6,IRF1,IRF4,ITK,LEF1,LY9,PLA2G2D,PTGER4,RC3H1,RC3H2,RELB,RORA,RORC,RPL22,RSAD2,SATB1,SEMA4A,SLAMF6,STAT6,SYK,TCF7,TNFSF8,ZAP70,ZFPM1	Human
NCB-CB	_tstat	within each collection	BP: GO biological process	GO_MITOCHONDRIAL_TRANSLATION	0.00152362	0.0098745	-0.346039	-1.62904	2	104	MRPL36,MRPL13,MTIF2,MRPL39,MRPL16,MRPS36,MRPS18B,MRPL19,MRPS30,MRPL40,MRPL37,MRPL44,MRPL18,MRPS16,MTIF3,MRPL49,MRPL11,TSFM,MRPS15,MRPL46,MRPS12,MRPL34,MRPS18C,CHCHD1,MRPS6,MRPL14,MRPL53,MRPL35,NOA1,GFM2,MRPS35,MRPS11,MRPS27,MRPS9	34	0.326923	AARS2,AURKAIP1,C12orf65,CHCHD1,DAP3,DARS2,EARS2,GADD45GIP1,GATC,GFM1,GFM2,HARS,HARS2,MRPL1,MRPL10,MRPL11,MRPL12,MRPL13,MRPL14,MRPL15,MRPL16,MRPL17,MRPL18,MRPL19,MRPL2,MRPL20,MRPL21,MRPL22,MRPL23,MRPL24,MRPL27,MRPL28,MRPL3,MRPL30,MRPL32,MRPL33,MRPL34,MRPL35,MRPL36,MRPL37,MRPL38,MRPL39,MRPL4,MRPL40,MRPL41,MRPL42,MRPL43,MRPL44,MRPL45,MRPL46,MRPL47,MRPL48,MRPL49,MRPL50,MRPL51,MRPL52,MRPL53,MRPL54,MRP…	Human
NCB-CB	_tstat	within each collection	BP: GO biological process	GO_COFACTOR_METABOLIC_PROCESS	0.000635	0.00533609	-0.296702	-1.62694	0	303	COQ2,AHCYL1,ME1,HK3,SPR,PPCS,MTRR,MAT2B,DGAT1,HKDC1,PCBD1,SUCLG1,CBR1,ACOT4,QPRT,DLD,MCCC2,PPT2,NFU1,NADK,NMNAT1,PPCDC,ENO3,KCNAB2,MOCS2,ACSS2,SLC25A32,ACSL5,TALDO1,NMNAT2,ACOT9,PCBD2,COQ7,HMOX2,MOCS1,MDH1,THEM4,SLC5A6,HSD17B12,RSAD1,VNN2,HLCS,SUCLG2,AKR1B10,DHFR,PGM2,MCEE,MRI1,PANK1,TKT,PNPO,HSCB,CBR3,KYNU,SLC19A1,AKR7A2,ADPGK,GCH1,SDHAF1,TMEM14C,TPK1,FXN,MOCOS,AASDHPPT,COASY,HMOX1,ISCU,RFK,ACOT…	119	0.392739	AADAT,AASDHPPT,AASS,ABCB6,ACACA,ACACB,ACLY,ACOT1,ACOT11,ACOT12,ACOT13,ACOT2,ACOT4,ACOT7,ACOT8,ACOT9,ACSF2,ACSF3,ACSL1,ACSL3,ACSL4,ACSL5,ACSL6,ACSM2A,ACSS1,ACSS2,ADH4,ADPGK,AFMID,AGK,AHCY,AHCYL1,AHCYL2,AKR1B1,AKR1B10,AKR1C1,AKR1C2,AKR1C3,AKR1C4,AKR7A2,ALAD,ALAS1,ALAS2,ALDH1L1,ALDH1L2,ALDOA,ALDOB,ALDOC,AMBP,AMD1,APIP,ASPDH,ATIC,BAAT,BDH2,BHMT,BHMT2,BLVRA,BLVRB,BPGM,BTD,CBR1,CBR3,CBR4,CIAO1,CIAPIN1,…	Human
NCB-CB	_tstat	within each collection	BP: GO biological process	GO_CELLULAR_KETONE_METABOLIC_PROCESS	0.00428776	0.0217686	-0.385429	-1.626	8	59	CYP11A1,COQ2,CBR1,COQ7,DHRS4,SCP2,AKR1B10,CBR3,KYNU,AKR7A2,CYP17A1,DHRS9,GOT2,PNKD,HSD17B3,GPD1,KMO,STAT5B,CYP4F11,HAGH,GPI,CRYZL1,AKR1C3,AFP,TDO2,CACNA1H,IDO2,SRD5A1,AKR1C2,KDSR	30	0.508475	AADAT,ADH4,ADM,AFMID,AFP,AKR1B1,AKR1B10,AKR1C1,AKR1C2,AKR1C3,AKR1C4,AKR7A2,CACNA1H,CBR1,CBR3,CBR4,COQ2,COQ3,COQ4,COQ5,COQ6,COQ7,COQ9,CRYZL1,CYP11A1,CYP17A1,CYP2B6,CYP2W1,CYP4F11,CYP4F2,DHRS4,DHRS9,GLO1,GOT2,GPD1,GPI,HAGH,HMGCR,HSD17B1,HSD17B3,IDO1,IDO2,KDSR,KMO,KYNU,NDUFA9,OXCT1,PARK7,PDSS1,PDSS2,PNKD,SCP2,SRD5A1,STARD3,STAT5B,TDO2,UBIAD1,VKORC1,VKORC1L1	Human
NCB-CB	_tstat	within each collection	BP: GO biological process	GO_POSITIVE_REGULATION_OF_LIPID_TRANSPORT	0.00905387	0.0393023	-0.412801	-1.61994	19	42	MAPK9,NR1H3,NKX3-1,PLTP,P2RX4,ATP8A1,ATP8A2,TNFRSF11A,ABCG1,ABCA1,IL1B,P2RX7,SCP2,NFKBIA,TRIAP1,ABCB4,PLA2R1,ABCA7,TNFSF11	19	0.452381	ABCA1,ABCA12,ABCA7,ABCB4,ABCG1,ADIPOQ,APOE,ATP8A1,ATP8A2,BMP6,C1QTNF1,CYP4A11,CYP4F2,EDN1,GAL,IL1B,LIPG,LRAT,LRP1,MAP2K6,MAPK9,MIF,NFKBIA,NKX3-1,NR1H2,NR1H3,P2RX4,P2RX7,P2RY2,PLA2G6,PLA2R1,PLTP,PON1,PRELID1,PRKCD,PTCH1,SCP2,SIRT1,TMF1,TNFRSF11A,TNFSF11,TRIAP1	Human
NCB-CB	_tstat	within each collection	BP: GO biological process	GO_PROTEIN_SECRETION	0.00149775	0.00972637	-0.347598	-1.61975	2	98	POU2F2,GOLPH3,AIM2,LILRB1,BTN3A2,RAB1A,PLEK,TLR6,BTN3A1,TLR4,NOD2,CAMK2G,RAB8B,ABCA1,SNCG,GBP5,PTPRN2,TLR2,MYO5A,CCR7,MON1A,RIMS2,NOS2,CD40LG,LAX1,S100A13,TACR2,LCP2,CD36,NLRP3,LYN,AKAP5	32	0.326531	ABCA1,ACVR2B,AGT,AIM2,AKAP5,ANXA1,ARFGAP3,ARL4D,BLOC1S3,BTN3A1,BTN3A2,CAMK2G,CANX,CBLN1,CBLN4,CCL19,CCR7,CD36,CD40LG,CHI3L1,CPLX1,CYB5R4,EIF2AK3,ERP29,F2RL1,FAM3B,FGG,FKBP1B,FOXP1,GAL,GATA3,GBP5,GNAS,GNPTAB,GOLPH3,GPAM,HMGB1,HNF1A,HNF1B,IL1RN,ILDR2,LAX1,LCP2,LILRB1,LMF1,LTBP2,LYN,MAFA,MC4R,MON1A,MYO5A,NECAB3,NLRC4,NLRP3,NOD2,NOS2,NOTCH1,NOX5,NR1H4,OLFM2,PAFAH1B1,PCLO,PCSK5,PDIA4,PLEK,PNP,POU2F2,P…	Human
NCB-CB	_tstat	within each collection	BP: GO biological process	GO_ALPHA_AMINO_ACID_CATABOLIC_PROCESS	0.00147565	0.00964686	-0.354167	-1.61736	2	88	DDO,MTRR,PCBD1,CARNS1,DLD,NOS3,MCCC2,HOGA1,IVD,GLUD2,THNSL2,OAT,HNMT,NOS2,GLUD1,ASRGL1,CBS,KYNU,GOT2,ASL,QDPR,MTHFS,FAH,AMT,KMO,NOS1,SDS,AMDHD1,GCSH,TDO2,GOT1,AUH,HMGCL,GCDH,ALDH7A1,ACAD8,IDO2,GLS2,ALDH1L1	39	0.443182	AADAT,AASS,ABHD12,ACAD8,ACMSD,AFMID,AGXT,AGXT2,AHCY,ALDH1L1,ALDH1L2,ALDH4A1,ALDH6A1,ALDH7A1,AMDHD1,AMT,ARG1,ASL,ASPA,ASRGL1,AUH,CARNS1,CBS,CDO1,CRYM,DAO,DDAH1,DDAH2,DDO,DLD,DLST,DTD1,FAH,FTCD,GAD1,GCAT,GCDH,GCSH,GLDC,GLS,GLS2,GLUD1,GLUD2,GLUL,GOT1,GOT2,GPT,GPT2,GSTZ1,HAAO,HAL,HDC,HGD,HIBADH,HIBCH,HMGCL,HNMT,HOGA1,HPD,IDO1,IDO2,IL4I1,IVD,KMO,KYNU,MCCC1,MCCC2,MTHFS,MTRR,NOS1,NOS2,NOS3,OAT,OGDH,OTC,…	Human
NCB-CB	_tstat	within each collection	BP: GO biological process	GO_POSITIVE_REGULATION_OF_TRANSPORTER_ACTIVITY	0.00288739	0.015956	-0.376589	-1.61681	5	65	KCNE3,CTSS,RNF207,GLRX,GSTO1,SGK1,CFTR,SUMO1,CALM3,CACNA2D1,PTAFR,GSTM2,AGER,STIM1,TRDN,AKAP7,SGK3,TRPC6,S100A1,SGK2,BMP4,SHANK3,GAL,ACTN2,FGF14,PRKCD,HAP1	27	0.415385	ACTN2,ACTN4,AGER,AKAP6,AKAP7,AKAP9,ANK2,ANK3,ARC,ASPH,ATP1B1,ATP1B2,ATP1B3,BMP4,CACNA2D1,CACNB2,CALM1,CALM2,CALM3,CFTR,CTSS,DMD,DNM2,DRD4,FGF14,GAL,GLRX,GSTM2,GSTO1,HAP1,HSPA2,HTT,JPH2,KCNE3,KCNJ11,NLGN3,NOS1AP,PARK7,PKD2,PLCG2,PON1,PRKCD,PTAFR,RAPGEF3,RELN,RGN,RNF207,RYR2,S100A1,SGK1,SGK2,SGK3,SHANK3,SLC9A1,STIM1,STIM2,SUMO1,SYNGR3,TESC,TRDN,TRPC6,WNK1,WNK2,WNK3,WNK4	Human
NCB-CB	_tstat	within each collection	BP: GO biological process	GO_REGULATION_OF_LYMPHOCYTE_APOPTOTIC_PROCESS	0.0087963	0.0383903	-0.401606	-1.61572	18	47	PRKCQ,CD274,CD74,BTK,IL10,FNIP1,DOCK8,ADA,GIMAP8,RIPK3,RAG1,CD27,P2RX7,LYN,ADAM8,CCL5,PDCD1,JAK3,LGALS9,FAS,BBC3,PTEN,HSH2D,BMP4,CD3G,FADD	26	0.553191	ADA,ADAM8,AURKB,BAX,BBC3,BCL10,BCL6,BIRC7,BMP4,BTK,CCL5,CD27,CD274,CD3G,CD74,DOCK8,FADD,FAS,FNIP1,FOXP1,GIMAP8,GPAM,HIF1A,HSH2D,IDO1,IL10,IRS2,JAK3,LGALS3,LGALS9,LYN,MIF,NOC2L,P2RX7,PDCD1,PRELID1,PRKCQ,PTEN,RAG1,RIPK3,RORC,SLC39A10,TGFB2,TP53,TSC22D3,WNT5A,ZC3H8	Human
NCB-CB	_tstat	within each collection	BP: GO biological process	GO_POSITIVE_REGULATION_OF_ANION_TRANSPORT	0.010064	0.0424887	-0.406746	-1.61411	21	44	MAPK9,VAMP8,VAMP7,P2RX4,ATP8A1,ATP8A2,TNFRSF11A,CFTR,IL1B,P2RX7,PTAFR,TACR2,PINK1,TRIAP1,AVPR1A,ABCB4,PLA2R1,ABCA7,DRD2,TNFSF11,ARL6IP1,APOE,PRELID1,CXCL12,PRKCD	25	0.568182	ABAT,ABCA7,ABCB4,APOE,ARL6IP1,ATP8A1,ATP8A2,AVPR1A,CFTR,CXCL12,CYP4A11,CYP4F2,DPYSL2,DRD2,DRD4,EDN1,GABBR1,GDNF,IL1B,MAP2K6,MAPK9,MIF,OPRK1,P2RX4,P2RX7,P2RY2,PCP4,PINK1,PLA2G6,PLA2R1,PRELID1,PRKCD,PTAFR,RAB3B,RAB3GAP1,SLC38A3,SLC6A1,SNX4,TACR2,TNFRSF11A,TNFSF11,TRIAP1,VAMP7,VAMP8	Human
NCB-CB	_tstat	within each collection	BP: GO biological process	GO_SERINE_FAMILY_AMINO_ACID_METABOLIC_PROCESS	0.0103697	0.0434399	-0.418082	-1.61315	22	39	AHCYL1,MTRR,GCLM,SARS,SLC25A32,GGT1,THNSL2,DHFR,MRI1,CBS,AMT,SEPHS2,GCLC,SDS,GCSH,CTH,SHMT2,APIP,GART,GLYAT,PSAT1,AHCY,SEPSECS	23	0.589744	AGXT,AGXT2,AHCY,AHCYL1,AHCYL2,AMT,APIP,BAAT,CBS,CDO1,CTH,DAO,DHFR,DMGDH,EIF4A3,GART,GCAT,GCLC,GCLM,GCSH,GGT1,GLDC,GLYAT,MPST,MRI1,MTHFD1,MTRR,PHGDH,PSAT1,PSPH,SARS,SDS,SEPHS2,SEPSECS,SHMT1,SHMT2,SLC25A32,SRR,THNSL2	Human
NCB-CB	_tstat	within each collection	BP: GO biological process	GO_CELLULAR_LIPID_CATABOLIC_PROCESS	0.000543	0.00530695	-0.325614	-1.60517	0	139	PLA2G4C,HEXB,MGLL,SESN2,LPIN3,HADHB,FABP3,DECR1,CPT1B,ETFA,IVD,HADHA,LIPE,HADH,ABCD1,CYP26C1,ENPP6,SCP2,AKR1B10,CRAT,PEX7,GLA,MCEE,ENPP2,SMPDL3A,ABCD2,FAAH,SIRT2,NEU4,ECHS1,ACADS,PLA2G15,CROT,NAPEPLD,ACAD11,LIPC,LPIN2,BDH2,ECI2,AMACR,GM2A,ECI1,NAGA,SRD5A3,FABP6,PEX13,ACAA1,NUDT19,CPT1A,ECH1,SGPL1,CYP1B1,HSD17B4,CPT2,AKR1C3,SLC27A4,APOE,INPP5F,ETFDH,PNPLA3,PEX2,ACADM,GCDH,ACAD8,ABHD2	65	0.467626	ABCD1,ABCD2,ABCD3,ABHD12,ABHD2,ABHD6,ACAA1,ACAD10,ACAD11,ACAD8,ACAD9,ACADL,ACADM,ACADS,ACADSB,ACADVL,ACOT8,ACOX1,ACOX2,ACOX3,ACOXL,ADIPOQ,AKR1B10,AKR1C3,ALDH3A2,AMACR,ANGPTL3,APOA1,APOA2,APOA5,APOB,APOC3,APOE,BCO2,BDH2,CEL,CPS1,CPT1A,CPT1B,CPT1C,CPT2,CRABP1,CRAT,CROT,CYP1B1,CYP26A1,CYP26B1,CYP26C1,CYP4A11,CYP4F12,CYP4F2,CYP4F3,DAGLA,DECR1,ECH1,ECHS1,ECI1,ECI2,EHHADH,ENPP2,ENPP6,ENPP7,ETFA,ETFB,ET…	Human
NCB-CB	_tstat	within each collection	BP: GO biological process	GO_LYTIC_VACUOLE_ORGANIZATION	0.0079033	0.0353599	-0.397715	-1.60478	16	48	HPS1,NAGPA,TFEB,HEXB,VPS18,CLN3,LRRK2,ABCA1,RAB20,ZKSCAN4,P2RX7,CORO1A,SYT7,MFSD8,LYST,CLN6,TPP1,RAB14	18	0.375	ABCA1,ACP2,AKTIP,ARF1,ARSB,ATP6V0C,BECN1,CHMP5,CLN3,CLN5,CLN6,CLN8,CLVS1,CORO1A,FAM160A2,GAA,GNPTAB,HEXB,HOOK1,HOOK2,HOOK3,HPS1,HPS4,LAMTOR1,LRRK2,LYST,MBTPS1,MFSD8,MYO7A,NAGLU,NAGPA,P2RX7,PPT1,RAB14,RAB20,RAB34,RAB7A,SRPX,SYT7,TFEB,TMEM165,TMEM175,TPCN2,TPP1,VPS11,VPS18,ZKSCAN3,ZKSCAN4	Human
NCB-CB	_tstat	within each collection	BP: GO biological process	GO_POSITIVE_REGULATION_OF_SECRETION	0.000638	0.00533609	-0.292804	-1.60217	0	300	MAPK9,NPR1,TNFRSF14,RAB27A,CADPS2,GSDMD,STX1B,HFE,PRKCQ,ARRB1,HLA-E,CD274,GOLPH3,AIM2,IL4R,BLK,VAMP8,VEGFC,RASGRP1,CCL3,MCU,CD58,IL10,KCNB1,RAB9A,NKX3-1,VAMP7,SEC24A,HAVCR2,P2RX4,IL17RA,FCER1G,ZAP70,MAPK14,CSF1R,CRTAM,IL33,DTNBP1,FGR,CASP1,GIPR,STXBP5,PTPN22,NOD2,TNFRSF11A,HTR2B,IFNAR1,RAB8B,FCN1,CFTR,TRPM2,JAK2,IL17RC,SLAMF1,IL1B,XBP1,EDNRB,CD14,P2RX7,BAD,C2CD2L,GLUD1,PTAFR,SYT7,CCR2,UNC13D,TNFR…	109	0.363333	AACS,ABAT,ABL1,ACHE,ACSL3,ADAM8,ADAM9,ADORA1,ADORA2B,AGT,AGTR2,AIM2,ALOX15B,ANG,ANO1,AP1G1,APBB1,APLN,AQP1,ARF1,ARHGEF7,ARRB1,ATG5,ATP13A2,ATP6AP1,AVPR1A,BAD,BLK,BMP6,C1QTNF1,C1QTNF3,C2CD2L,C5,CACNA1G,CACNA1H,CACNA1I,CADM1,CADPS2,CAPN10,CARD8,CASP1,CCL19,CCL3,CCR2,CD14,CD2,CD244,CD274,CD276,CD34,CD38,CD58,CDK5,CFTR,CHMP2A,CLASP1,CLASP2,CLEC4E,CLEC5A,CLEC6A,CPB2,CREB1,CRTAM,CSF1R,CXCL12,CYBA,CYP4A…	Human
NCB-CB	_tstat	within each collection	BP: GO biological process	GO_REGULATION_OF_LEUKOCYTE_CHEMOTAXIS	0.00147565	0.00964686	-0.350646	-1.60128	2	88	GPSM3,MPP1,CCR1,C3AR1,CD74,VEGFC,CCL3,STAP1,CSF1,C5AR1,NCKAP1L,AIF1,TIRAP,CMKLR1,RAC2,ANO6,CXCL11,KLRK1,IL1B,CCR7,ADAM10,DAPK2,CCR2,THBS4,CCL4,IL6R,CCL21,LYN,CCL7,TNFSF14,CXCL9,CCL5,KLRC4-KLRK1,CXCL13,LGALS9,IL23A,PTK2B,CX3CL1,RARRES2,CCL19,CXCL10	41	0.465909	ADAM10,ADAM17,AIF1,ANO6,C1QBP,C3AR1,C5,C5AR1,CALR,CAMK1D,CCL19,CCL2,CCL21,CCL3,CCL4,CCL5,CCL7,CCR1,CCR2,CCR6,CCR7,CD74,CMKLR1,CREB3,CSF1,CX3CL1,CXCL1,CXCL10,CXCL11,CXCL12,CXCL13,CXCL14,CXCL2,CXCL3,CXCL5,CXCL6,CXCL9,DAPK2,EDN2,EDN3,EDNRA,F2RL1,F7,GAS6,GPSM3,GREM1,HMGB1,IL12A,IL1B,IL23A,IL6,IL6R,JAM3,KLRC4-KLRK1,KLRK1,LBP,LGALS9,LYN,MMP28,MPP1,NBL1,NCKAP1L,PADI2,PLA2G7,PPBP,PTK2B,RAC1,RAC2,RARRES2,…	Human
NCB-CB	_tstat	within each collection	BP: GO biological process	GO_TRANSLATIONAL_ELONGATION	0.00201613	0.012279	-0.335734	-1.59192	3	107	MRPL36,MRPL13,MRPL39,MRPL16,MRPS36,MRPS18B,MRPL19,MRPS30,MRPL40,MRPL37,MRPL44,EEF1A2,MRPL18,MRPS16,MRPL49,MRPL11,TSFM,MRPS15,MRPL46,MRPS12,MRPL34,MRPS18C,ABTB1,CHCHD1,EEF1E1,MRPS6,EEF1D,MRPL14,MRPL53,MRPL35,GFM2,MRPS35,MRPS11,EEF2K,MRPS27,MRPS9,MRPL22,PSTK	38	0.35514	ABTB1,AURKAIP1,C12orf65,CHCHD1,DAP3,DIO2,EEF1A1,EEF1A2,EEF1B2,EEF1D,EEF1E1,EEF1G,EEF2,EEF2K,EEFSEC,EIF5A,EIF5A2,GADD45GIP1,GFM1,GFM2,GTPBP1,GTPBP2,HBS1L,MRPL1,MRPL10,MRPL11,MRPL12,MRPL13,MRPL14,MRPL15,MRPL16,MRPL17,MRPL18,MRPL19,MRPL2,MRPL20,MRPL21,MRPL22,MRPL23,MRPL24,MRPL27,MRPL28,MRPL3,MRPL30,MRPL32,MRPL33,MRPL34,MRPL35,MRPL36,MRPL37,MRPL38,MRPL39,MRPL4,MRPL40,MRPL41,MRPL42,MRPL43,MRPL44,MRPL4…	Human
NCB-CB	_tstat	within each collection	BP: GO biological process	GO_REGULATION_OF_SYMBIOSIS_ENCOMPASSING_MUTUALISM_THROUGH_PARASITISM	0.00229753	0.0135095	-0.308785	-1.59112	3	184	APOBEC3D,APOBEC3G,PARP10,TRIM25,ZC3HAV1,TAP2,OAS1,TNIP1,TRIM21,CD28,CCL3,FAM111A,BST2,TAP1,MPO,TRIM31,MDFIC,IL10,C19orf66,LTA,IRF8,APOBEC3F,MX1,PPIB,TIRAP,POLR2E,IFITM1,MID2,OAS3,EIF2AK2,TRIM14,CHD1,FCN1,TRIM26,DERL1,HPN,CAV2,APOBEC3C,ZNF502,IFIT1,ISG20,SP100,BAD,POLR2L,TRIM38,CCR2,CCL4,CD36,PLSCR1,CAV1,CCL5,SQSTM1,ADARB1,RNASEL,OSBP,TRIM5,CHMP4C,VPS4A,EIF2AK4,PABPC1,PML,RSAD2,IFI16,LGALS9,SP1,PO…	68	0.369565	ADAR,ADARB1,APCS,APOBEC3A,APOBEC3C,APOBEC3D,APOBEC3F,APOBEC3G,APOE,BAD,BCL2,BCL2L11,BST2,BTBD17,C19orf66,CAV1,CAV2,CCL3,CCL4,CCL5,CCNK,CCNT1,CCR2,CD28,CD36,CDK9,CFL1,CHD1,CHMP2A,CHMP2B,CHMP3,CHMP4B,CHMP4C,CTDP1,CTSG,DDB1,DDX3X,DDX5,DERL1,DYNLT1,EIF2AK2,EIF2AK4,EP300,EXOC2,EXOC7,F2RL1,FAM111A,FBLN1,FCN1,FCN3,FUCA2,GSN,GTF2F1,GTF2F2,HDAC1,HMGA2,HPN,HS3ST5,IFI16,IFIT1,IFITM1,IFITM2,IFITM3,IFNG,IL10,…	Human
NCB-CB	_tstat	within each collection	BP: GO biological process	GO_CYTOSOLIC_CALCIUM_ION_TRANSPORT	0.0107628	0.0447387	-0.392258	-1.58927	22	49	IBTK,CCL3,LCK,HTR2B,JPH3,TRPM2,PTPRC,CCR7,P2RX7,CCR5,SLC8A3,CACNA2D1,RYR1,CCL21,TRDN,BBC3,SLC8A1,RASA3,DRD2,CCL19,TPCN2,TRPV1	22	0.44898	ADRA1A,ATP2A2,ATP2B4,BBC3,CACNA1C,CACNA2D1,CACNB3,CCL19,CCL21,CCL3,CCR5,CCR7,CHERP,DDIT3,DRD2,F2R,FGF2,FKBP1B,HTR2A,HTR2B,HTR2C,IBTK,ITPR1,ITPR2,ITPR3,JPH1,JPH2,JPH3,JPH4,LCK,MCOLN1,P2RX7,PKD2,PLCG2,PRKCE,PTPRC,RASA3,RYR1,RYR2,RYR3,SLC8A1,SLC8A3,TPCN1,TPCN2,TRDN,TRPA1,TRPM2,TRPV1,XCL1	Human
NCB-CB	_tstat	within each collection	BP: GO biological process	GO_POSITIVE_REGULATION_OF_CALCIUM_ION_TRANSPORT	0.00196754	0.0120284	-0.347276	-1.58589	3	88	KCNE3,CCR1,P2RX5,CCL3,P2RX4,CD4,GSTO1,CAPN3,CXCL11,SUMO1,TRPV3,P2RX7,CALM3,P2RX3,CACNA2D1,CCL4,GSTM2,CAMK2A,ORAI1,MYLK,AKAP5,CAV1,STIM1,TRDN,CXCL9,CCL5,ARRB2,JAK3,BAK1,TRPC6,S100A1,CXCR3,CXCL10,BMP4,TRPV2,PDPK1,FGF14,UCN,CXCL12,HAP1,BAX,TRPC3,XCL1,CACNA1D,STC1,LGALS3,PLCG2	47	0.534091	ABL1,ADCYAP1R1,AKAP5,AKAP6,ANK2,ARRB2,ASPH,ATP1B1,ATP2B2,BAK1,BAX,BMP4,CACNA1D,CACNA2D1,CACNB2,CALM1,CALM2,CALM3,CAMK2A,CAPN3,CASK,CAV1,CCL2,CCL3,CCL4,CCL5,CCR1,CD4,CLDN16,CREB3,CXCL10,CXCL11,CXCL12,CXCL9,CXCR3,DRD1,EDNRA,F2,F2R,F2RL3,FGF14,GSTM2,GSTO1,HAP1,HOMER1,HSPA2,HTT,JAK3,JPH2,KCNE3,LGALS3,LPAR3,MYLK,ORAI1,P2RX3,P2RX4,P2RX5,P2RX7,PDGFB,PDGFRB,PDPK1,PKD2,PLCG1,PLCG2,RAPGEF3,RGN,RYR2,S100A1,…	Human
NCB-CB	_tstat	within each collection	BP: GO biological process	GO_HEMOSTASIS	0.000612	0.00532127	-0.293153	-1.58433	0	262	CD40,CAPZA2,RAB27A,VAV1,PRKCQ,IRF2,ARRB1,ANXA7,GATA5,IRF1,P2RX5,SH2B3,GP1BA,EHD1,DOCK9,LAT,PLEK,P2RX4,FCER1G,WAS,C1GALT1C1,PRKACB,DOCK8,PRKAR2A,DGKE,DTNBP1,FLI1,LCK,RAC2,DOCK11,ANO6,ADORA2A,PRKCH,JAK2,ADRA2B,FERMT3,P2RY12,P2RX7,METAP1,CD40LG,MAPK3,P2RX3,PIK3CG,AXL,P2RX1,PIK3R5,LCP2,CD36,PAPSS2,MAPK1,LYN,PIK3R6,PLSCR1,HPS6,GNA14,ZFPM2,ARRB2,PTPN6,PIK3R1,ADAMTS13,GNA11,RAP2B,RHOG,GGCX,MERTK,CLIC1,P…	108	0.412214	A2M,ACTB,ACTG1,ACTN1,ADAMTS13,ADORA2A,ADRA2A,ADRA2B,ADRA2C,AK3,AKAP1,AKAP10,AKT1,ANO6,ANXA5,ANXA7,ANXA8,AP3B1,APOH,ARRB1,ARRB2,AVPR2,AXL,BLOC1S3,C1GALT1C1,C1QBP,C3,C4BPB,CAPZA1,CAPZA2,CAPZB,CBX5,CD177,CD36,CD40,CD40LG,CD59,CD9,CDC42,CLEC1B,CLIC1,COL1A1,COL1A2,COL3A1,CPB2,CSRP1,CX3CL1,CYP4F11,CYP4F2,DGKA,DGKB,DGKD,DGKE,DGKG,DGKH,DGKI,DGKK,DGKQ,DGKZ,DOCK1,DOCK11,DOCK6,DOCK8,DOCK9,DTNBP1,EHD1,EHD2,E…	Human
NCB-CB	_tstat	within each collection	BP: GO biological process	GO_REGULATION_OF_REGULATED_SECRETORY_PATHWAY	0.00253036	0.0146048	-0.331547	-1.57661	4	109	RAB27A,STX1B,FES,IL4R,VAMP8,FMR1,KCNB1,C2CD4B,DOC2A,VAMP7,FCER1G,RAP1A,ZAP70,CD84,NAPA,FGR,RAC2,LRRK2,CD300A,SNX6,PTAFR,SYT7,CCR2,UNC13D,BCR,LYN,RAB15,LAMP1,SYT17,PRAM1,HMOX1,POMZP3,SYN1,C2CD4A,STX4,LGALS9,SYT1,GAB2,TRIM9,AP1G1,SPINK1	41	0.376147	ABR,ADORA2B,ADRA2A,AP1G1,ARF1,ATP2A2,B4GALT1,BCR,BRAF,C12orf4,C2CD4A,C2CD4B,C2CD4D,CACNA1A,CACNA1G,CACNA1H,CACNA1I,CCR2,CD300A,CD84,CDK5,CEACAM1,DOC2A,DOC2B,F2RL1,FCER1A,FCER1G,FER,FES,FGR,FMR1,FOXF1,GAB2,GRIK5,HMOX1,IL13RA2,IL4R,KCNB1,LAMP1,LGALS9,LRRK2,LYN,NAPA,NLGN1,NOTCH1,PDPK1,PFN2,PLB1,PLCB1,POMZP3,PRAM1,PTAFR,RAB15,RAB27A,RAB3A,RAB3D,RAB3GAP1,RAB5A,RABGEF1,RAC2,RAP1A,REST,RIMS3,RIMS4,RPH3A…	Human
NCB-CB	_tstat	within each collection	BP: GO biological process	GO_NEGATIVE_REGULATION_OF_HOMEOSTATIC_PROCESS	0.00302572	0.016557	-0.329192	-1.57289	5	111	NBN,IBTK,CD74,CCL3,COMT,FCER1G,CSK,GSTO1,ADA,LCK,FCRL5,HTR2B,CLIC2,JPH3,PTPRC,INPP5D,CCR7,TNFRSF11B,P2RX7,CCR5,CALM3,RYR1,GSTM2,CCL21,TERF2,CD38,TRDN,PIM3,PML,BBC3,NOS1,GAS2L1,MAFB,STAT5B,RASA3,TNFAIP3,DRD2,CCL19,TPCN2,TRPV1,FADD,ADRA2A,EPO	43	0.387387	ACD,ADA,ADORA1,ADRA2A,ANPEP,ARRDC3,ATM,AVPR2,BBC3,BCL10,BCL2,CALM1,CALM2,CALM3,CASQ2,CCL19,CCL21,CCL3,CCR5,CCR7,CD38,CD74,CHERP,CLIC2,COMT,CSK,DDIT3,DRD2,ENY2,EPO,ERCC1,ERCC4,F2R,FADD,FCER1G,FCRL5,FGF2,FKBP1A,FKBP1B,FLCN,GAS2L1,GNL3L,GPAM,GSTM2,GSTO1,HMGCR,HNRNPA1,HNRNPC,HNRNPU,HOXA5,HTR2A,HTR2B,HTR2C,IBTK,INPP5D,ITPKB,ITPR1,ITPR2,ITPR3,JPH2,JPH3,KITLG,KLF13,LCK,LDB1,MAFB,MCOLN1,MCRS1,MIF,NAT10,N…	Human
NCB-CB	_tstat	within each collection	BP: GO biological process	GO_ENDOCYTOSIS	0.000724	0.00546749	-0.273229	-1.57089	0	466	SNX30,FCHO2,FNBP1,NR1H3,VAV1,ARRB1,SNX10,APOL1,IGLV7-43,LILRB1,IGHV2-70,MLC1,SNX9,RAB1A,BIN1,UBE3A,CYFIP1,CLTB,CD163L1,IGKV1D-33,ELMO1,FOLR2,EHD1,GTF2H2,IGKV3D-20,NCKAP1L,RINL,AIF1,MEGF10,IGKV3D-11,BIN2,VAMP7,IRF8,IGLL5,CD163,SNX1,DAB2,FCER1G,CD209,SYNJ1,WAS,TRDC,ANKFY1,CDC42SE2,SIGLEC1,RUFY1,MYO1G,ENPP3,FGR,CLN3,FCGR3A,CD247,AP2A2,ITGB2,SNX2,USP33,LY75,DOCK2,ITGA4,MYH2,SNX33,HTR2B,LRRK2,FCN1,ADO…	150	0.321888	AAK1,ABCA1,ABCA7,ABI1,ABL1,ACHE,ACTB,ACTG1,ACTR2,ACTR3,ADM,ADORA1,ADORA2A,ADRB2,AHSG,AIF1,ALB,AMBP,AMN,AMPH,ANKFY1,ANXA1,ANXA11,ANXA3,AP1S1,AP2A1,AP2A2,AP2B1,AP2M1,AP2S1,APLP1,APOA1,APOB,APOBR,APOE,APOL1,APP,ARC,ARHGAP27,ARPC1A,ARPC1B,ARPC2,ARPC3,ARPC4,ARPC5,ARRB1,ARRB2,ASGR1,ASGR2,ATP6V1H,ATP9A,ATP9B,AXL,BAIAP2,BCL2L1,BECN1,BIN1,BIN2,BRK1,C4B,C9orf72,CALCRL,CALR,CANX,CAP1,CAV1,CAV2,CD14,CD163,CD…	Human
NCB-CB	_tstat	within each collection	BP: GO biological process	GO_REACTIVE_OXYGEN_SPECIES_METABOLIC_PROCESS	0.00343643	0.0183087	-0.349057	-1.56921	6	81	GPX3,SPR,VAV1,CYBB,MPO,NOS3,PRDX4,LRRK2,MPV17L,NCF1,SFTPD,P2RX7,SOD2,NOS2,SLC7A2,PRDX3,SOD1,GCH1,NDUFS4,NDUFS1,PDK4,RFK,CYB5R4,DUOX2,CYBA,NOS1,PLA2R1,NCF2,IMMP2L,PRDX1,CYP1B1,NNT,NDUFS3,NQO1,CCS,GLS2,EPHX2,RORA,DDIT4,GPX1,CYP1A1,GCHFR	42	0.518519	AKT1,AOX1,APOA4,ARG2,ATP7A,BCL2,BNIP3,CAT,CCS,CPS1,CYB5R4,CYBA,CYBB,CYP1A1,CYP1A2,CYP1B1,DDAH2,DDIT4,DUOX1,DUOX2,DUOXA1,EDN1,EPHX2,GBF1,GCH1,GCHFR,GLS2,GPX1,GPX3,HBA1,HBA2,HBB,IMMP2L,LPO,LRRK2,MAOB,MPO,MPV17L,NCF1,NCF2,NDUFA13,NDUFAF2,NDUFS1,NDUFS3,NDUFS4,NNT,NOS1,NOS2,NOS3,NOX4,NOX5,NOXA1,NQO1,P2RX7,PARK7,PAX2,PDGFB,PDK4,PLA2R1,PMAIP1,POR,PRDX1,PRDX2,PRDX3,PRDX4,PRDX5,PRDX6,PREX1,PXDN,PXDNL,RFK,…	Human
NCB-CB	_tstat	within each collection	BP: GO biological process	GO_NUCLEOBASE_CONTAINING_SMALL_MOLECULE_METABOLIC_PROCESS	0.000722	0.00546749	-0.274156	-1.56722	0	450	DCTD,NPR1,TCIRG1,APOBEC3G,AHCYL1,NDUFAF1,PRPS2,ME1,HK3,PPCS,MTRR,MPP1,COX5A,MAT2B,RRM2B,TAZ,OAS1,UQCR11,NDUFS7,HKDC1,UPP1,NDUFA1,NDUFV3,SUCLG1,CARD11,SULT1A2,AMPD1,UQCRB,QPRT,HPRT1,PDE8A,DLD,HINT1,APOBEC3F,MCCC2,DPYD,NME6,SLC35B3,NEIL1,ABHD14B,GLRX,CYC1,NADK,NMNAT1,OAS2,ENPP3,PPCDC,ENO3,KCNAB2,ADA,CMPK1,MOCS2,ADCY9,COX6C,NUDT9,COX7A2L,TALDO1,NMNAT2,HTR2B,UPRT,LRRK2,SULT1A1,MOCS1,MDH1,ADORA2A,UQCR…	128	0.284444	ABHD14B,ACACA,ACACB,ACOT7,ACPP,ADA,ADAL,ADCY1,ADCY10,ADCY2,ADCY3,ADCY4,ADCY5,ADCY6,ADCY7,ADCY8,ADCY9,ADK,ADM,ADORA2A,ADPGK,ADSL,ADSS,ADSSL1,AFMID,AHCY,AHCYL1,AHCYL2,AK1,AK2,AK3,AK4,AK5,AK7,AK8,ALDH6A1,ALDOA,ALDOB,ALDOC,AMD1,AMPD1,AMPD2,AMPD3,AOX1,APIP,APOBEC3A,APOBEC3C,APOBEC3F,APOBEC3G,APRT,AQP1,ASPDH,ATIC,ATP1A2,ATP1B1,ATP2B2,ATP6V0A1,ATP6V0A2,ATP6V0A4,ATP6V1A,ATP6V1B1,ATP6V1B2,BAD,BHMT,BHMT2,B…	Human
NCB-CB	_tstat	within each collection	BP: GO biological process	GO_REGULATION_OF_ACUTE_INFLAMMATORY_RESPONSE	0.00673725	0.0312601	-0.364928	-1.56674	13	65	C2,C3AR1,C5AR1,FCER1G,TNFRSF11A,IL1B,EDNRB,CCR7,CR1,PIK3CG,PPARG,SPN,PTGER3,CCR2,NLRP3,RHBDD3,CFP,ADAM8,OSM,CCL5,PROS1,TNF,TNFSF11,KLKB1,C7,SERPING1,A2M,F12,C1QBP,OSMR	30	0.461538	A2M,ADAM8,ADORA1,APCS,ASH1L,C1QBP,C2,C3,C3AR1,C4A,C4B,C4BPA,C4BPB,C5,C5AR1,C6,C7,C8A,C8B,C8G,C9,CCL5,CCR2,CCR7,CD46,CD55,CD59,CFB,CFH,CFI,CFP,CNR1,CR1,CREB3L3,EDNRB,F12,FCER1A,FCER1G,GSTP1,IL1B,IL20RB,IL6,IL6ST,KLKB1,MASP1,NLRP3,OSM,OSMR,PHB,PHB2,PIK3CG,PLA2G4A,PPARG,PROS1,PTGER3,PTGS2,RHBDD3,SERPING1,SPN,SUSD4,TNF,TNFRSF11A,TNFSF11,VTN,ZP3	Human
NCB-CB	_tstat	within each collection	BP: GO biological process	GO_DIVALENT_INORGANIC_CATION_TRANSPORT	0.00117233	0.00811847	-0.297459	-1.56581	1	216	NIPA1,IBTK,SLC30A5,CACNA2D4,SLC30A4,CAMK2D,GRIN3A,SLC24A1,CCR1,TRPM7,MICU1,SLC40A1,CCL3,MCU,MMGT1,GJA4,CYSLTR1,TCN2,VDAC1,MRS2,LCK,SLC24A4,CAMK2G,HTR2B,ANO6,JPH3,TRPM2,SLC39A3,DENND5B,PTPRC,CCR7,NIPAL2,P2RY12,TRPV3,SLC35G1,P2RX7,CCR5,PKD1L2,SLC8A3,NIPA2,CCL8,CORO1A,SLC30A3,RAMP1,NMUR1,CACNA2D1,PKD1L3,CACNA1F,RYR1,TMEM37,CCL21,CAMK2A,ORAI1,CAV1,STIM1,RAMP3,TRDN,CYP27B1,BHLHA15,CCL5,ATP2A1,GRIN3B,C…	75	0.347222	ADRA1A,ANK2,ANO6,ANXA5,ANXA6,ASPH,ATP2A1,ATP2A2,ATP2A3,ATP2B1,ATP2B2,ATP2B3,ATP2B4,ATP2C1,ATP2C2,BBC3,BHLHA15,BSPRY,CACHD1,CACNA1A,CACNA1B,CACNA1C,CACNA1D,CACNA1E,CACNA1F,CACNA1G,CACNA1H,CACNA1I,CACNA2D1,CACNA2D2,CACNA2D3,CACNA2D4,CACNB1,CACNB2,CACNB3,CACNB4,CACNG4,CACNG8,CALCRL,CAMK2A,CAMK2D,CAMK2G,CASK,CASR,CATSPER2,CAV1,CCL19,CCL21,CCL3,CCL5,CCL8,CCR1,CCR5,CCR7,CDH23,CDK5,CHERP,CHRNA10,CHRNA4,…	Human
NCB-CB	_tstat	within each collection	BP: GO biological process	GO_CELLULAR_RESPONSE_TO_INTERLEUKIN_1	0.00480769	0.0238467	-0.350421	-1.5622	9	77	MAPK9,NFKB1,PSMB9,IL1RL2,CCL4L2,CCL24,IRAK2,CCL3,NKX3-1,HSPA9,HYAL3,MAPK3,YY2,CCL8,PTGER3,XCL2,CCL4,CCL21,PYCARD,CCL7,RPS6KA4,CCL5,CCL23,RELA,FAS,ZC3H12A,EGR1,CX3CL1,PTGER4,CCL13,PPP4C,CCL18,CCL19,HYAL1	34	0.441558	ADAMTS12,ADAMTS7,BYSL,CCL11,CCL13,CCL14,CCL15,CCL16,CCL18,CCL19,CCL2,CCL20,CCL21,CCL22,CCL23,CCL24,CCL3,CCL4,CCL4L2,CCL5,CCL7,CCL8,CEBPB,CHI3L1,CX3CL1,DAB2IP,EDN1,EGR1,FAS,FGB,FN1,HAS2,HIF1A,HSPA9,HYAL1,HYAL2,HYAL3,ICAM1,IKBKB,IL1R1,IL1RL2,IL6,IRAK1,IRAK2,IRAK3,KLF2,MAPK3,MAPK9,MYLK3,NFKB1,NKX3-1,OTUB1,P2RY2,PAWR,PLCB1,PPP4C,PSMB9,PTGER3,PTGER4,PTGIS,PYCARD,RBMX,RC3H1,RELA,RORA,RPS6KA4,RPS6KA5,SF…	Human
NCB-CB	_tstat	within each collection	BP: GO biological process	GO_ION_HOMEOSTASIS	0.00074	0.00555402	-0.270455	-1.55746	0	477	CD40,B2M,TCIRG1,IBTK,SLC30A5,ATP6V0E1,SLC30A4,XIAP,RAP1GDS1,TMEM64,HFE,CAMK2D,KCNMA1,ATOX1,ANXA7,DGAT1,HEXB,SLC24A1,CCR1,SLC26A4,C3AR1,TRPM7,MICU1,SYPL2,SLC40A1,CCL3,ATP6V1C1,MCU,FABP3,SLC9A8,C5AR1,CD52,HERPUD1,XK,CYSLTR1,CUTC,TTC7A,FASLG,SFXN4,SGK1,SLC9A9,XCR1,CLN3,GIPR,PRKAA1,LCK,SLC24A4,HTR2B,LRRK2,CFTR,SLC25A28,HMOX2,JPH3,ABCG1,ABCA1,TRPM2,SCO2,TMC8,JAK2,CETP,GRINA,IL1B,ABCG2,PTPRC,RAB20,XBP1…	163	0.341719	ABCA1,ABCB6,ABCB7,ABCC2,ABCG1,ABCG2,ABL1,ABL2,ACO1,ADCY5,ADM,ADRA1A,ADRA1B,AGER,AGT,AGTR1,AGTR2,ALAS2,ANGPTL3,ANK2,ANK3,ANXA6,ANXA7,APOA1,APOE,APP,ARF1,ATOX1,ATP12A,ATP13A1,ATP13A2,ATP13A3,ATP13A4,ATP1A1,ATP1A2,ATP1A3,ATP1B1,ATP1B2,ATP1B3,ATP2A1,ATP2A2,ATP2A3,ATP2B1,ATP2B2,ATP2B3,ATP2B4,ATP2C1,ATP2C2,ATP6AP1,ATP6V0A1,ATP6V0A2,ATP6V0A4,ATP6V0B,ATP6V0C,ATP6V0D1,ATP6V0D2,ATP6V0E1,ATP6V0E2,ATP6V1A,AT…	Human
NCB-CB	_tstat	within each collection	BP: GO biological process	GO_NEGATIVE_REGULATION_OF_SECRETION	0.00275482	0.0154688	-0.307724	-1.5462	4	155	NR1H3,BANK1,LILRB1,VAMP8,CD74,FMR1,COMT,IL10,KCNB1,SRGN,ANXA4,RAP1A,CD84,ACVR1C,IL33,ADA,SIRT4,PTPN22,GBP1,HADH,CD300A,ADRA2B,SLAMF1,IL1B,BTN2A2,P2RY12,RAB33B,EGF,PTGER3,CCR2,TACR2,BCR,PDE4C,TNFRSF9,NLRP3,FOXP3,OSM,HMOX1,PNKD,PIM3,PML,RSAD2,LGALS9,TMBIM6,NOS1,PLA2R1,ANGPT1,ERP29,ZC3H12A,PPP3CA,CX3CL1,ACSL4,P2RY1,TNF,PTGER4,TRIM9,DRD2,NRG1,C1QTNF3,CRHBP,PTPN11	61	0.393548	ABAT,ABR,ACSL4,ACVR1C,ADA,ADIPOQ,ADORA1,ADRA2A,ADRA2B,ADRA2C,AGTR2,ANGPT1,ANPEP,ANXA1,ANXA4,ANXA5,APOA1,APOA2,AVPR2,BANK1,BCR,BMP8A,BRAF,BTN2A2,C1QTNF3,CCR2,CD300A,CD34,CD74,CD84,CEACAM1,CHGA,CNR1,COMT,CRHBP,CRY1,CX3CL1,CYP4F2,DPH3,DRD2,DRD4,EDN1,EGF,ENY2,ERBB3,ERP29,EZR,F2R,F2RL1,FBLN1,FKBP1B,FMR1,FN1,FOXF1,FOXP3,GABBR1,GAS6,GBP1,GCK,HADH,HMGCR,HMOX1,IL10,IL11,IL13RA2,IL1B,IL33,IL6,INHA,INHBA,IN…	Human
NCB-CB	_tstat	within each collection	BP: GO biological process	GO_POSITIVE_REGULATION_OF_SEQUENCE_SPECIFIC_DNA_BINDING_TRANSCRIPTION_FACTOR_ACTIVITY	0.00175541	0.0110663	-0.295495	-1.54252	2	205	CD40,NFKB1,TRIM25,NTRK1,TRIM34,PRKCQ,CLOCK,AIM2,GTF2A2,TRIM21,BTK,IRAK2,TRADD,TRIM31,IL10,CARD11,TIRAP,MID2,TRIM22,EIF2AK2,TRIM14,ITGB2,TLR4,NOD2,NFAM1,TNFRSF11A,CAPN3,MTDH,TRIM26,RIPK2,PRKCH,JAK2,RIPK3,TLR2,IL1B,RIPK1,SP100,CD40LG,WNT10B,CIB1,PPARG,TRIM38,PRDX3,IL6R,TAB2,NFKBIB,CAMK2A,PINK1,NLRP3,AGER,PYCARD,ADAM8,RPS6KA4,IKBKG,NFKBIA,EDA,NLRC4,TRIM5,TAF12,TLR3,WNT2,RELA,LGALS9,MBTPS2,S100A9,PRK…	78	0.380488	ADAM8,AGER,AGT,AIM2,AKT1,ALK,AMH,ANXA3,AR,ARHGEF2,ARHGEF5,ARID5B,ATF2,BCL10,BEX1,BTK,BUD31,CAMK1D,CAMK2A,CAPN3,CARD11,CARD14,CAT,CD40,CD40LG,CEBPG,CFLAR,CHUK,CIB1,CLOCK,CLU,CRTC1,CRTC2,CRTC3,CTH,CTNNB1,CYTL1,DDR2,DDRGK1,DDX58,DVL2,EDA,EDA2R,EIF2AK2,EP300,EPHA5,ERC1,ESR1,ESR2,FER,FOSL1,FOXA1,FZD1,FZD2,FZD4,GREM1,GTF2A2,HDAC4,HDAC5,HIPK2,HSPA1A,HSPA1B,ICAM1,IKBKB,IKBKG,IL10,IL1B,IL6,IL6R,IRAK1,IRAK…	Human
NCB-CB	_tstat	within each collection	BP: GO biological process	GO_POSITIVE_REGULATION_OF_LEUKOCYTE_CHEMOTAXIS	0.0063015	0.0296638	-0.347245	-1.54	12	76	GPSM3,CCR1,C3AR1,CD74,VEGFC,CCL3,CSF1,C5AR1,NCKAP1L,AIF1,TIRAP,CMKLR1,RAC2,ANO6,CXCL11,IL1B,CCR7,ADAM10,DAPK2,CCR2,THBS4,CCL4,IL6R,CCL21,CCL7,TNFSF14,CXCL9,CCL5,CXCL13,LGALS9,IL23A,PTK2B,CX3CL1,RARRES2,CCL19,CXCL10	36	0.473684	ADAM10,ADAM17,AIF1,ANO6,C1QBP,C3AR1,C5AR1,CALR,CAMK1D,CCL19,CCL2,CCL21,CCL3,CCL4,CCL5,CCL7,CCR1,CCR2,CCR6,CCR7,CD74,CMKLR1,CREB3,CSF1,CX3CL1,CXCL1,CXCL10,CXCL11,CXCL12,CXCL13,CXCL14,CXCL2,CXCL3,CXCL5,CXCL6,CXCL9,DAPK2,EDN2,EDN3,EDNRA,F2RL1,F7,GAS6,GPSM3,HMGB1,IL12A,IL1B,IL23A,IL6,IL6R,LBP,LGALS9,NCKAP1L,PLA2G7,PPBP,PTK2B,RAC1,RAC2,RARRES2,S100A14,S100A7,SERPINE1,SWAP70,THBS1,THBS4,TIRAP,TMEM102,T…	Human
NCB-CB	_tstat	within each collection	BP: GO biological process	GO_MYELOID_CELL_DIFFERENTIATION	0.00225352	0.0133234	-0.302221	-1.53576	3	168	CASP10,BATF2,CASP3,CASP8,SNX10,PIR,TMOD3,LRRK1,CSF1,ACP5,HHEX,BATF3,NCKAP1L,CD86,IRF8,NKAP,TIRAP,BATF,MB,MAPK14,CSF1R,FLI1,TNFRSF11A,GAB3,PIP4K2A,SPI1,JAK2,SNRK,MEF2C,IKZF1,CBFA2T3,CCR7,LTBR,CIB1,PPARG,PRDX3,EPAS1,LYN,IRF4,SFXN1,RASGRP4,GFI1,IL31RA,THPO,DNASE2,PTPN6,UBD,PML,NFE2L1,IFI16,LGALS9,GAB2,RELB,TNF,TAL1,TNFSF11,CCL19,TGFBR2,BMP4,PTPN11,PDE2A,TNFSF9,CD109,TRIM10,EPO,MT1G,PIK3CD	67	0.39881	ABI1,ACIN1,ACP5,ACTN1,ADAR,ADD1,ALAS2,ANXA2,ARID4A,BATF,BATF2,BATF3,BCL6,BCL6B,BMP4,CAMK4,CASP10,CASP3,CASP8,CASP9,CBFA2T3,CBFB,CCL19,CCR7,CD109,CD86,CDC42,CDKN1C,CDKN2B,CEBPA,CEBPG,CIB1,CLEC1B,CLEC5A,CSF1,CSF1R,CTNNB1,DHRS2,DNASE2,DYRK3,EFNA2,EIF2AK1,EP300,EPAS1,EPHA2,EPO,ERCC2,F2RL1,FAM20C,FARP2,FLI1,FLVCR1,FOXP1,G6PD,GAB2,GAB3,GATA2,GATA3,GFI1,GLO1,GPC3,HCLS1,HHEX,HIPK2,HOXB7,ID2,IFI16,IKZF1,I…	Human
NCB-CB	_tstat	within each collection	BP: GO biological process	GO_CALCIUM_ION_TRANSPORT	0.00343643	0.0183087	-0.299935	-1.53407	5	177	IBTK,CACNA2D4,CAMK2D,GRIN3A,SLC24A1,CCR1,TRPM7,MICU1,CCL3,MCU,GJA4,CYSLTR1,VDAC1,LCK,SLC24A4,CAMK2G,HTR2B,ANO6,JPH3,TRPM2,DENND5B,PTPRC,CCR7,P2RY12,TRPV3,SLC35G1,P2RX7,CCR5,PKD1L2,SLC8A3,CCL8,CORO1A,RAMP1,NMUR1,CACNA2D1,PKD1L3,CACNA1F,RYR1,TMEM37,CCL21,CAMK2A,ORAI1,CAV1,STIM1,RAMP3,TRDN,CYP27B1,BHLHA15,CCL5,ATP2A1,GRIN3B,CDH23,CUL5,BBC3,PRKCB,PPP3CA,TRPC6,ATP2A3,SLC8A1,RASA3,SRL,DRD2,CCL19,SLC3A2…	68	0.384181	ADRA1A,ANK2,ANO6,ANXA5,ANXA6,ASPH,ATP2A1,ATP2A2,ATP2A3,ATP2B1,ATP2B2,ATP2B3,ATP2B4,ATP2C1,ATP2C2,BBC3,BHLHA15,BSPRY,CACHD1,CACNA1A,CACNA1B,CACNA1C,CACNA1D,CACNA1E,CACNA1F,CACNA1G,CACNA1H,CACNA1I,CACNA2D1,CACNA2D2,CACNA2D3,CACNA2D4,CACNB1,CACNB2,CACNB3,CACNB4,CACNG4,CACNG8,CALCRL,CAMK2A,CAMK2D,CAMK2G,CASK,CASR,CATSPER2,CAV1,CCL19,CCL21,CCL3,CCL5,CCL8,CCR1,CCR5,CCR7,CDH23,CDK5,CHERP,CHRNA10,CHRNA4,…	Human
NCB-CB	_tstat	within each collection	BP: GO biological process	GO_INTERACTION_WITH_HOST	0.00417101	0.0213097	-0.318084	-1.53321	7	120	TNFRSF14,ZC3HAV1,TAP2,CASP8,VAMP8,TNIP1,TAP1,SMAD3,CD86,CD209,VPS18,CD4,IDE,SERPINB9,EIF2AK2,CD80,DERL1,ITCH,SLC22A5,SLAMF1,CAV2,SELPLG,IFIT1,DPP4,NEDD4,CCR5,CR1,BAD,AXL,NUP153,UVRAG,CCR2,TNFRSF4,MRC1,ITGB7,LAMP1,CAV1,WWP1,ITGA5,CLEC4M,EIF2AK4,KPNA3,EPS15	43	0.358333	ACE2,ALB,ANPEP,APCS,ATG7,AXL,BAD,BCL2L1,BCL2L11,C9,CASP8,CAV1,CAV2,CCNK,CCR2,CCR5,CD209,CD4,CD46,CD55,CD80,CD81,CD86,CDHR3,CLDN1,CLEC4G,CLEC4M,CLEC5A,CPSF4,CR1,CR2,CTSB,CXADR,CXCR4,DAG1,DERL1,DPP4,DYNLT1,EFNB2,EFNB3,EIF2AK2,EIF2AK4,EPS15,F11R,GAS6,HIPK2,HLA-DRB1,HSPA1A,HSPA1B,HTR2A,HYAL2,ICAM1,IDE,IFIT1,INSR,ITCH,ITGA2,ITGA5,ITGAV,ITGB1,ITGB3,ITGB5,ITGB6,ITGB7,KPNA1,KPNA2,KPNA3,KPNA4,KPNA5,KPNB1,…	Human
NCB-CB	_tstat	within each collection	BP: GO biological process	GO_REGULATION_OF_PEPTIDE_TRANSPORT	0.00175541	0.0110663	-0.293535	-1.53229	2	205	HFE,PRKCQ,ARRB1,TIAM1,CLOCK,CYLD,BLK,CD74,MCU,IL10,SLC25A5,KCNB1,RAP1A,ARL2BP,ACVR1C,PPM1B,FBXW11,GIPR,SIRT4,SLC25A4,TLR4,SLC16A1,NR1D1,ARNTL,RAB8B,HADH,CFTR,TRPM2,JAK2,TLR2,IL1B,CCDC22,CD27,BCL3,IL18,NOS2,BAD,C2CD2L,PTGER3,GLUD1,SYT7,SIDT2,NFKBIB,PDE4C,NLRP3,TLR7,CD38,TNFSF14,NFKBIA,EDA,CCL5,PIM3,TLR3,STX4,LGALS9,MYRIP,IL23A,S100A9,NOS1,ZC3H12A,PPP3CA,CPT1A,TNF,PTGER4,DRD2,PRDX1,TNFSF11,SLC26A6,…	75	0.365854	AACS,ABAT,ACVR1C,ADCY5,ADORA1,ADRA2A,ADRA2C,ANO1,ANXA5,APLN,ARHGEF7,ARL2,ARL2BP,ARNTL,ARRB1,BAD,BCL3,BLK,BMP7,BMP8A,BRSK2,C1QTNF3,C2CD2L,CA2,CACNA1A,CACNA1C,CACNA1D,CACNA1E,CACNA2D2,CAPN10,CCDC22,CCL19,CCL5,CD27,CD38,CD74,CDK16,CFTR,CHD7,CLOCK,CNR1,CPT1A,CRHBP,CYLD,DOC2B,DRD2,EDA,EDAR,EFNA5,ENSA,ENY2,EPHA5,FAF1,FBXW11,FGA,FGB,FGG,FKBP1B,FOXA2,G3BP2,GABBR1,GCK,GIPR,GJA1,GLP1R,GLUD1,GLUL,GNAS,GPLD1…	Human
NCB-CB	_tstat	within each collection	BP: GO biological process	GO_NEGATIVE_REGULATION_OF_INTRACELLULAR_TRANSPORT	0.00214477	0.0128686	-0.313859	-1.53012	3	130	PARP10,CYLD,FMR1,BST2,MDFIC,IL10,SLC25A5,APC2,RAP1A,CSK,CD84,GSTO1,PPM1B,FBXW11,SIRT4,TBC1D10C,FCRL5,LRRK2,MPV17L,CD300A,SIAH3,CLIC2,CRYAB,CCDC22,EMD,UBE2J1,ANXA13,SP100,OGT,CALM3,NUP153,NFKBIL1,GSTM2,CD36,NFKBIB,NLRP3,DERL3,NFKBIE,SUFU,NFKBIA,TRDN,HMOX1,SNX12,LGALS9,NOS1,ANGPT1,ZC3H12A,MAPT,PBLD,PKDCC,TXN	51	0.392308	ACAA2,ADIPOQ,AKAP1,ANGPT1,ANXA13,APC2,APOD,AXIN2,BAG4,BARD1,BCL2,BMP7,BRAF,BST2,C1QTNF3,CALM1,CALM2,CALM3,CASQ2,CCDC22,CD300A,CD36,CD84,CDK5,CLIC2,CNIH2,CREB3,CRYAB,CSK,CYLD,DAB2IP,DACT3,DERL2,DERL3,DYRK2,EMD,EPO,ERLEC1,FAF1,FAM89B,FBXW11,FCRL5,FKBP1A,FKBP1B,FMR1,FOXF1,FZD1,G3BP2,GAS6,GDI1,GOPC,GSK3B,GSTM2,GSTO1,HMOX1,HNF4A,HSPA1A,IL10,IL13RA2,INPP5K,INSIG1,ITGB1BP1,KCNE1,KEAP1,LGALS9,LITAF,LRRK2…	Human
NCB-CB	_tstat	within each collection	BP: GO biological process	GO_LYMPHOCYTE_ACTIVATION_INVOLVED_IN_IMMUNE_RESPONSE	0.00876766	0.038317	-0.346978	-1.52734	17	74	NBN,RAB27A,LILRB1,APBB1IP,CD180,CD86,VAMP7,FCER1G,BATF,ADA,ITGAL,TLR4,MFNG,SLAMF6,LCP1,CD1C,BCL3,CD40LG,EOMES,CORO1A,UNC13D,LY9,IRF4,GPR183,STAT6,CD244,EIF2AK4,PTK2B,RELB,PTGER4,IFNG,CLEC4E	32	0.432432	ABL1,ADA,APBB1IP,ATP7A,BATF,BCL3,CD180,CD1C,CD244,CD40LG,CD86,CLEC4E,CORO1A,DLL1,EIF2AK4,EOMES,ERCC1,EXO1,EXOSC3,EXOSC6,F2RL1,FCER1G,FOXP1,GAPT,GATA3,GPR183,HMGB1,HSPD1,ICAM1,IFNG,IL18R1,IL6,IRF4,ITFG2,ITGAL,LCP1,LEF1,LFNG,LGALS1,LIG4,LILRB1,LY9,MFNG,MLH1,MSH2,MSH6,NBN,NOTCH2,PLCG2,PLCL2,PSEN1,PTGER4,PTK2B,RAB27A,RC3H1,RC3H2,RELB,RNF168,RNF8,RORA,RORC,RPS6,SEMA4A,SLAMF6,SLC11A1,STAT6,SWAP70,TLR4,…	Human
NCB-CB	_tstat	within each collection	BP: GO biological process	GO_EXTRINSIC_APOPTOTIC_SIGNALING_PATHWAY	0.00549176	0.0264685	-0.33107	-1.52704	10	93	CASP10,CASP3,SGPP1,CASP8,TRADD,TNFSF12,G0S2,SMAD3,FASLG,MKNK2,IL33,TNFRSF1B,JAK2,IL1B,RIPK1,CD27,BLOC1S2,P2RX7,BCL2A1,BAD,CIB1,IL6R,TNFRSF1A,TNFRSF9,TNFRSF18,BID,BCL2L10,PIK3R1,TNFRSF10C,BAK1,TLR3,PML,BCL2L2,HIPK1,DAPK1,APPL1,FAS	37	0.397849	ACVR1B,APPL1,BAD,BAG3,BAK1,BAX,BCL2,BCL2A1,BCL2L1,BCL2L10,BCL2L11,BCL2L2,BID,BLOC1S2,BOK,CASP10,CASP2,CASP3,CASP8,CASP8AP2,CASP9,CD27,CD70,CIB1,CRADD,DAB2IP,DAPK1,DAXX,DCC,DDX3X,DDX47,DEDD,DEDD2,DIABLO,ERBB3,EYA2,FADD,FAS,FASLG,FGFR3,FOXO3,G0S2,GABARAP,GSK3A,GSK3B,HIPK1,IFNG,IL12A,IL1B,IL33,IL6R,INHBA,ITGAV,JAK2,KITLG,KRT18,KRT8,MCL1,MKNK2,MLLT11,MOAP1,NDUFA13,NF1,NGF,P2RX7,PARP2,PDPK1,PIK3R1,PML…	Human
NCB-CB	_tstat	within each collection	BP: GO biological process	GO_GLYCOSYL_COMPOUND_METABOLIC_PROCESS	0.000636	0.00533609	-0.277608	-1.52543	0	311	DCTD,TCIRG1,APOBEC3G,AHCYL1,NDUFAF1,HK3,PPCS,MTRR,MPP1,COX5A,MAT2B,TAZ,UQCR11,NDUFS7,HKDC1,UPP1,NDUFA1,NDUFV3,CARD11,SULT1A2,UQCRB,HPRT1,DLD,APOBEC3F,MCCC2,DPYD,NME6,SLC35B3,ABHD14B,CYC1,NADK,PPCDC,ENO3,ADA,CMPK1,MOCS2,COX6C,NUDT9,COX7A2L,UPRT,LRRK2,SULT1A1,MOCS1,UQCR10,COX6B1,TK2,APOBEC3C,AK4,NDUFAB1,HDDC3,AKR1B10,UQCRFS1,CHCHD10,BAD,MYH3,MCEE,MACROD1,MRI1,PANK1,ADK,UQCRC2,NDUFB11,KL,UQCRQ,NDUFA…	87	0.279743	ABHD10,ABHD14B,ACACA,ACACB,ACOT7,ACPP,ADA,ADAL,ADK,ADPGK,ADSL,ADSS,ADSSL1,AHCY,AHCYL1,AHCYL2,AK1,AK2,AK3,AK4,AK5,AKR1B1,AKR1B10,AKR1C1,AKR1C2,AKR1C3,AKR1C4,AKR7A2,ALDOA,ALDOB,ALDOC,AMD1,AMPD2,AMPD3,APIP,APOBEC3A,APOBEC3C,APOBEC3F,APOBEC3G,APRT,ATIC,ATP1A2,ATP1B1,ATP6V0A1,ATP6V0A2,ATP6V0A4,ATP6V1A,ATP6V1B1,ATP6V1B2,BAD,BHMT,BHMT2,BPGM,BPNT1,CAD,CARD11,CASK,CBR4,CDA,CHCHD10,CMPK1,COASY,COQ9,COX10,C…	Human
NCB-CB	_tstat	within each collection	BP: GO biological process	GO_SINGLE_ORGANISM_CELL_ADHESION	0.000693	0.00544918	-0.269404	-1.5246	0	401	B2M,RAB27A,NHEJ1,PSMB10,VAV1,CASP8,HLA-E,MICB,IRF1,GOLPH3,NINJ2,ICAM2,COL19A1,STK11,LILRB1,TNIP1,CD74,CD28,RAB1A,STK10,ANXA9,IL15,CD58,CARD11,TBX21,SMAD3,LAT,MEGF11,APBB1IP,PLEK,CD86,MEGF10,NKAP,FCER1G,TCF7,CD209,BATF,WAS,CD4,ZAP70,BTN3A1,SIGLEC1,CRTAM,ITK,DOCK8,CD3D,ADA,TNFSF8,ITGB2,ITGAL,PTPN22,LCK,SATB1,DOCK2,ITGA4,RAC2,THEMIS,IFNAR1,CD80,RIPK2,SLAMF6,SELP,LCP1,RIPK3,RAG1,LILRB2,CD1C,IL1B,PTPR…	149	0.371571	ABL1,ACTB,ACTG1,ACTN1,ADA,ADAM17,ADAM8,ADAM9,AKIP1,ANTXR1,ANXA1,ANXA9,APBB1IP,APOA4,ARVCF,ASTN1,ATG5,ATP7A,AXL,AZI2,B2M,BATF,BAX,BCL11B,BCL2,BCL3,BMP7,BMX,BRAF,BTN3A1,BVES,CADM1,CAMSAP3,CARD11,CASP8,CBLL1,CCL19,CCL21,CCL5,CCND3,CCR7,CD151,CD1C,CD1D,CD2,CD209,CD24,CD276,CD28,CD2AP,CD34,CD3D,CD3E,CD3G,CD4,CD40LG,CD44,CD58,CD7,CD74,CD80,CD86,CD8A,CD8B,CD93,CDC42,CDH1,CDH2,CDH24,CDH3,CDH5,CDHR2,CDK5R…	Human
NCB-CB	_tstat	within each collection	BP: GO biological process	GO_LIPID_MODIFICATION	0.00284738	0.0158311	-0.296175	-1.52351	4	182	EFR3A,MTM1,VAV1,OCRL,CD19,SESN2,PI4K2B,CD28,HADHB,PIK3C2B,DECR1,MTMR1,CPT1B,CD86,SOAT1,ETFA,TRAT1,SYNJ1,MAPK14,INPP1,PI4K2A,PRKAA1,IVD,LCK,HADHA,MTMR6,CD80,HADH,ABCD1,PIP4K2A,MTMR8,INPP5D,IP6K1,SCP2,CRAT,PEX7,TTC7B,PIK3CG,PPARG,PIK3R5,PI4KA,SACM1L,EGF,KL,ABCD2,PIK3R6,ECHS1,CYP4V2,ACADS,CROT,ACAD11,PIK3R1,CYGB,BDH2,ECI2,AMACR,ECI1,TMEM150A,PEX13,ACAA1,SMG1,NUDT19,CPT1A,ECH1,PTEN,PIK3CB,NRG1,HSD17B…	83	0.456044	ABCD1,ABCD2,ABCD3,ACAA1,ACAD10,ACAD11,ACAD8,ACAD9,ACADL,ACADM,ACADS,ACADSB,ACADVL,ACOT8,ACOX1,ACOX2,ACOX3,ACOXL,ACSM1,ADIPOQ,ADIPOR1,ADIPOR2,AGK,ALDH3A2,AMACR,B4GALNT1,B4GALNT2,BDH2,BPNT1,BTC,CD19,CD28,CD80,CD86,CERK,CPT1A,CPT1B,CPT1C,CPT2,CRAT,CROT,CYGB,CYP4V2,DECR1,DGKZ,ECH1,ECHS1,ECI1,ECI2,EFR3A,EFR3B,EGF,EGFR,EHHADH,EPHX2,ERBB2,ERBB3,ERBB4,EREG,ETFA,ETFB,ETFDH,FA2H,FAM126A,FGF1,FGF10,FGF17,FG…	Human
NCB-CB	_tstat	within each collection	BP: GO biological process	GO_PLATELET_ACTIVATION	0.0016129	0.0103907	-0.311437	-1.52188	2	132	CD40,VAV1,PRKCQ,ARRB1,GP1BA,LAT,PLEK,FCER1G,C1GALT1C1,DGKE,LCK,RAC2,PRKCH,ADRA2B,FERMT3,P2RY12,METAP1,CD40LG,MAPK3,PIK3CG,AXL,P2RX1,PIK3R5,LCP2,MAPK1,LYN,PIK3R6,PLSCR1,GNA14,ARRB2,PTPN6,PIK3R1,ADAMTS13,GNA11,RAP2B,RHOG,MERTK,CLIC1,PRKCB,ITGB3,TRPC6,CX3CL1,P2RY1,GNG2,PIK3CB,F8,PTPN11,GNA15,VWF,PDPK1,ADRA2A,TYRO3,ITPR2,DGKZ,PRKCD,PRKCA,DGKK,RAF1,TRPC3,STXBP3	60	0.454545	ACTB,ACTG1,ACTN1,ADAMTS13,ADRA2A,ADRA2B,ADRA2C,AKT1,ARRB1,ARRB2,AXL,BLOC1S3,C1GALT1C1,CD40,CD40LG,CD9,CLEC1B,CLIC1,COL1A1,COL1A2,COL3A1,CSRP1,CX3CL1,DGKA,DGKB,DGKD,DGKE,DGKG,DGKH,DGKI,DGKK,DGKQ,DGKZ,ENTPD2,F2,F2R,F2RL2,F2RL3,F5,F8,FCER1G,FERMT3,FGA,FGB,FGG,FIBP,FLNA,FYN,FZD6,GAS6,GNA11,GNA12,GNA13,GNA14,GNA15,GNAQ,GNAS,GNB1,GNG2,GP1BA,GP1BB,HBB,HRG,HSPB1,IL6,ILK,ITGA2B,ITGB3,ITPR1,ITPR2,ITPR3,LAT…	Human
NCB-CB	_tstat	within each collection	BP: GO biological process	GO_NEGATIVE_REGULATION_OF_ESTABLISHMENT_OF_PROTEIN_LOCALIZATION	0.00284738	0.0158311	-0.295844	-1.52181	4	182	PARP10,NR1H3,BANK1,CYLD,LILRB1,MDFIC,IL10,KCNB1,SRGN,ANXA4,APC2,CSK,ACVR1C,IL33,PPM1B,FBXW11,SIRT4,PTPN22,TBC1D10C,GBP1,LRRK2,HADH,SIAH3,SLAMF1,IL1B,BTN2A2,CCDC22,EMD,UBE2J1,ANXA13,SP100,OGT,NFKBIL1,PTGER3,CD36,PPP2R5A,NFKBIB,PDE4C,TNFRSF9,NLRP3,DERL3,FOXP3,NFKBIE,SUFU,NFKBIA,PIM3,SNX12,PML,RSAD2,TMEM59,TMBIM6,NOS1,ANGPT1,ERP29,ZC3H12A,PPP3CA,CX3CL1,TNF,PTGER4,DRD2,PBLD,PKDCC,TXN,C1QTNF3,PTPN11,R…	69	0.379121	ACVR1C,ADIPOQ,ADRA2A,AKAP1,ANGPT1,ANXA1,ANXA13,ANXA4,ANXA5,APC2,APOA1,APOA2,APOD,AXIN2,BAG4,BANK1,BARD1,BCL2L1,BMP7,BMP8A,BTN2A2,C1QTNF3,CCDC22,CD34,CD36,CDK5,CREB3,CSK,CX3CL1,CYLD,DAB2IP,DACT3,DERL2,DERL3,DPH3,DRD2,DRD4,DYRK2,EMD,ENY2,ERLEC1,ERP29,EZR,F2R,F2RL1,FAF1,FAM89B,FBLN1,FBXW11,FKBP1B,FN1,FOXP3,FZD1,G3BP2,GAS6,GBP1,GDI1,GOPC,GSK3B,HADH,HMGCR,HNF4A,HSPH1,IL10,IL1B,IL33,IL6,INHBB,INPP5K,IR…	Human
NCB-CB	_tstat	within each collection	BP: GO biological process	GO_REGULATION_OF_SEQUENCE_SPECIFIC_DNA_BINDING_TRANSCRIPTION_FACTOR_ACTIVITY	0.000647	0.00536719	-0.275279	-1.5192	0	326	MAPK9,CD40,NFKB1,PARP10,TRIM25,NTRK1,TRIB1,TRIM34,PRKCQ,ARRB1,CLOCK,AIM2,GTF2A2,CYLD,TRIM21,BTK,IRAK2,SIGIRR,TRADD,TRIM31,IL10,CARD11,ANXA4,HAVCR2,TIRAP,MAPK14,MID2,RWDD3,SGK1,CMKLR1,NLRC5,TRIM22,EIF2AK2,TRIM14,ITGB2,TLR4,NOD2,NFAM1,TNFRSF11A,CAPN3,MTDH,TRIM26,RIPK2,PRKCH,JAK2,ITCH,RIPK3,SUMO1,TLR2,IL1B,RIPK1,MAP2K5,SP100,CD40LG,MAPK3,WNT10B,HCK,CIB1,PPARG,TAF3,NLRC3,NFKBIL1,TRIM38,PRDX3,TNFRSF4,…	117	0.358896	ADAM8,AGER,AGT,AIM2,AKT1,ALK,AMH,ANXA3,ANXA4,AR,ARHGEF2,ARHGEF5,ARID5B,ARRB1,ARRB2,ATF2,BCL10,BEX1,BHLHE40,BMP7,BRMS1,BTK,BTRC,BUD31,C3orf33,CAMK1D,CAMK2A,CAPN3,CARD11,CARD14,CAT,CD40,CD40LG,CDK5RAP3,CDKN2A,CEBPG,CFLAR,CHUK,CIB1,CLOCK,CLU,CMKLR1,COMMD1,COMMD6,COMMD7,CREBZF,CRTC1,CRTC2,CRTC3,CTH,CTNNB1,CTNNBIP1,CYLD,CYP1B1,CYTL1,DAB2IP,DAP,DDIT3,DDR2,DDRGK1,DDX58,DNAJA3,DVL2,EDA,EDA2R,EGLN1,EIF2AK…	Human
NCB-CB	_tstat	within each collection	BP: GO biological process	GO_REGULATION_OF_RESPONSE_TO_CYTOKINE_STIMULUS	0.00465357	0.0232247	-0.314091	-1.5127	8	119	VRK2,NR1H3,CASP8,CYLD,PIAS1,CD74,TICAM2,BIRC3,IRAK2,PELI3,SIGIRR,STAP1,TRADD,CSF1,JAK1,NLRC5,IFNAR2,PARP9,IFNAR1,RIPK2,JAK2,SUMO1,SHARPIN,TXK,PTPRC,RIPK1,MAP2K5,PPARG,AXL,USP18,TNFRSF1A,PYCARD,CAV1,IKBKG,AGPAT2,CCL5,GFI1,PTPN6,PALM3,HIPK1,UBE2K,DNAJA3,ANGPT1,IRF7,TNFAIP3,TNF,RFFL,IFNG,TRAF1,PTPN11,IL1RN	51	0.428571	ADAR,ADIPOQ,AGPAT1,AGPAT2,ANGPT1,APOA1,AXL,BIRC2,BIRC3,CASP8,CAV1,CCL5,CD24,CD74,CDC37,CHUK,CLIP3,CPNE1,CSF1,CYLD,DNAJA3,ECM1,EDN1,F2RL1,FADD,GAS6,GFI1,GSTP1,HIF1A,HIPK1,HPX,HSP90AB1,HSPA1A,HSPA1B,IFNAR1,IFNAR2,IFNG,IFNGR1,IFNGR2,IKBKB,IKBKG,IL1RN,IL6ST,IRAK1,IRAK2,IRAK3,IRF3,IRF7,JAK1,JAK2,KLF4,LSM14A,MADD,MAP2K5,MAPK7,MAVS,MED1,MUL1,NLRC5,NR1H2,NR1H3,PADI2,PAFAH1B1,PALM3,PARP9,PELI3,PIAS1,PIAS4…	Human
NCB-CB	_tstat	within each collection	BP: GO biological process	GO_NEGATIVE_REGULATION_OF_TRANSPORT	0.000691	0.00544918	-0.269413	-1.51157	0	383	NFKB1,PARP10,CAB39,PPIF,NR1H3,CAMK2D,KCNE3,BANK1,CYLD,LILRB1,VAMP8,CD74,OAZ2,FMR1,COMT,BST2,MDFIC,IL10,SLC25A5,KCNB1,SRGN,ANXA4,NOS3,TRAT1,APC2,RAP1A,TBC1D4,CSK,CD84,GSTO1,ACVR1C,IL33,ADA,PPM1B,FBXW11,SIRT4,PTPN22,PRKAA1,TBC1D10C,GBP1,SNX33,FCRL5,LRRK2,MPV17L,HADH,CD300A,SIAH3,CLIC2,PACSIN2,CRYAB,SUMO1,ADRA2B,LILRB2,SLAMF1,IL1B,BTN2A2,CCDC22,UBQLN2,P2RY12,EMD,UBE2J1,NEDD4,ANXA13,SP100,RAB33B,OGT,…	126	0.328982	ABAT,ABCG5,ABCG8,ABR,ACAA2,ACSL4,ACTN2,ACVR1C,ADA,ADIPOQ,ADORA1,ADRA2A,ADRA2B,ADRA2C,AGT,AGTR2,AKAP1,AKAP5,AKT1,AKT2,ANGPT1,ANK3,ANKRD27,ANO9,ANPEP,ANXA1,ANXA13,ANXA2,ANXA4,ANXA5,APC2,APOA1,APOA2,APOC1,APOC2,APOC3,APOD,APOE,ARF6,ARL6IP5,ATF4,ATP1A2,ATXN2,AVPR2,AXIN2,BAG4,BANK1,BARD1,BCL2,BCR,BMP7,BMP8A,BRAF,BST2,BTN2A2,C1QTNF3,CAB39,CALM1,CALM2,CALM3,CAMK2D,CASQ2,CAV1,CCDC22,CCR2,CD300A,CD34,CD36…	Human
NCB-CB	_tstat	within each collection	BP: GO biological process	GO_NUCLEOSIDE_PHOSPHATE_BIOSYNTHETIC_PROCESS	0.00327154	0.0176042	-0.305858	-1.50875	5	141	DCTD,NPR1,TCIRG1,PRPS2,ME1,PPCS,RRM2B,OAS1,UPP1,SUCLG1,AMPD1,QPRT,HPRT1,NME6,SLC35B3,NADK,NMNAT1,OAS2,PPCDC,ADA,CMPK1,ADCY9,NMNAT2,HTR2B,UPRT,ADORA2A,CMPK2,TK2,AK4,CHCHD10,DHFR,PANK1,ADK,KYNU,PAPSS2,DUT,DCK	37	0.262411	ACACA,ACACB,ACOT7,ADA,ADCY1,ADCY10,ADCY2,ADCY3,ADCY4,ADCY5,ADCY6,ADCY7,ADCY8,ADCY9,ADK,ADM,ADORA2A,ADSL,ADSS,ADSSL1,AFMID,AK1,AK2,AK3,AK4,AK5,AK7,AK8,ALDOA,AMPD1,AMPD2,AMPD3,APRT,AQP1,ASPDH,ATIC,ATP6V0A1,ATP6V0A2,ATP6V0A4,CAD,CALCRL,CHCHD10,CMPK1,CMPK2,COASY,CTPS2,DCAKD,DCK,DCTD,DGUOK,DHFR,DHODH,DTYMK,DUT,ENTPD8,ERH,FLAD1,GARS,GART,GMPS,GUCY1A2,GUK1,HAAO,HPRT1,HTR2B,HTR2C,IMPDH1,IMPDH2,KMO,KYNU,L…	Human
NCB-CB	_tstat	within each collection	BP: GO biological process	GO_RECEPTOR_MEDIATED_ENDOCYTOSIS	0.00294118	0.0161335	-0.288503	-1.50792	4	207	FCHO2,ARRB1,APOL1,IGLV7-43,LILRB1,IGHV2-70,MLC1,SNX9,CLTB,CD163L1,IGKV1D-33,FOLR2,GTF2H2,IGKV3D-20,IGKV3D-11,CD163,SNX1,DAB2,FCER1G,SYNJ1,ENPP3,CLN3,AP2A2,ITGB2,ITGA4,HTR2B,IGLC1,PACSIN2,IGKV1-5,CETP,CAV2,SFTPD,CD14,CD6,NEDD4,AP1S1,FCGR1B,MAPK3,TMPRSS5,STAB1,PTGER3,IGLC3,RAMP1,ENPP2,CD5,IGKV4-1,FCGR1A,IGKC,MARCO,MRC1,CD36,MAPK1,ACHE,IGLC2,CAV1,RAMP3,SORL1	57	0.275362	ACHE,ADM,ADRB2,ALB,AMBP,AMN,AP1S1,AP2A1,AP2A2,AP2B1,AP2M1,AP2S1,APOA1,APOB,APOBR,APOE,APOL1,ARHGAP27,ARRB1,ARRB2,ASGR1,ASGR2,CALCRL,CALR,CANX,CAP1,CAV1,CAV2,CD14,CD163,CD163L1,CD207,CD36,CD5,CD5L,CD6,CD81,CD9,CDK5,CETP,CFI,CLN3,CLTA,CLTB,CLTC,CLTCL1,CNTN2,COLEC11,COLEC12,CTTN,CUBN,CXCL16,CXCR1,CXCR2,DAB2,DBNL,DENND1A,DLL1,DMBT1,DNM1,DNM2,DRD2,ENDOU,ENPP1,ENPP2,ENPP3,EPS15,EZR,FCER1G,FCGR1A,FCGR1B…	Human
NCB-CB	_tstat	within each collection	BP: GO biological process	GO_MAINTENANCE_OF_LOCATION_IN_CELL	0.00884086	0.038481	-0.32898	-1.5049	17	89	GOLPH3,IL10,SRGN,PDIA3,POLR2M,CD4,ARL2BP,TLN2,MORC3,VPS13C,ARHGAP21,TWF1,SPTBN4,CCDC22,BCL3,ANKRD13C,TAF3,NFKBIL1,UVRAG,SYNE1,NFKBIB,PINK1,CAV1,NFKBIE,SUFU,SORL1,NFKBIA,PDIA2,ATP2A1	29	0.325843	AKT1,ALB,ANK3,ANKRD13C,APOE,ARHGAP21,ARL2,ARL2BP,ASPM,ATP2A1,BBS4,BCL3,CAV1,CCDC22,CD4,CREB3,DAG1,DBN1,DZIP1,EPB41L3,EZR,FAF1,FLNA,FLNB,FTH1,G3BP2,GAA,GET4,GOLPH3,GOPC,GPAA1,GPSM2,GRIK5,GSN,HK1,HK2,HSPA5,IL10,JUP,KDELR1,KDELR2,KDELR3,KEAP1,LATS1,MDFI,MORC3,MXI1,NFKBIA,NFKBIB,NFKBIE,NFKBIL1,OS9,PDIA2,PDIA3,PINK1,PKD1,PKD2,PML,POLR2M,PSMD10,SCIN,SHANK1,SORL1,SPAG4,SPTBN4,SRGN,SRI,SUFU,SUN1,SUN2,SUP…	Human
NCB-CB	_tstat	within each collection	BP: GO biological process	GO_REGULATION_OF_DEFENSE_RESPONSE_TO_VIRUS	0.00277778	0.0155368	-0.297209	-1.50006	4	160	B2M,APOBEC3G,ZC3HAV1,MICB,HERC5,AIM2,LILRB1,BIRC3,CD28,NLRX1,REP15,IL15,HLA-A,CD163L1,ELMO1,DHX58,APOBEC3F,CD4,SLC35B3,PPM1B,EIF2AK2,CD247,AP2A2,LCK,DOCK2,AP1S2,IL12RB1,MDH1,ITCH,IFIT1,AP1S1,HCK,CD8B,IL2RA,SPN,DDX60,PNPO,TRIM38,MYLK,ASB2,PDK4,PEX3,FANCL,AP1B1,EIF2AK4,PML,SMURF1,IL23A,TRAF3,IL27,ZC3H12A,PEX13,YIPF1,TNFAIP3,AP1G1,TREM1	56	0.35	ACIN1,AIM2,ALKBH5,ALPK1,ANKRD17,ANXA5,AP1B1,AP1G1,AP1M1,AP1M2,AP1S1,AP1S2,AP1S3,AP2A1,AP2A2,AP2B1,AP2M1,AP2S1,APOBEC3F,APOBEC3G,ARF1,ASB2,ATP1B1,ATP6V1H,B2M,BIRC2,BIRC3,C1orf210,C1QBP,CCDC36,CD163L1,CD247,CD28,CD4,CD8B,CD93,CHAF1B,CHST3,CLDN7,COX8A,CPA3,CREB3,CRNKL1,CSPG5,DDX58,DDX60,DHX58,DNAAF2,DOCK2,DPF3,EIF2AK2,EIF2AK4,EIF2S1,ELMO1,ELMOD2,FABP1,FAM131B,FAM13B,FANCL,FCGR3B,FGF14,FGF7,FGFBP1,FX…	Human
NCB-CB	_tstat	within each collection	BP: GO biological process	GO_PURINE_CONTAINING_COMPOUND_METABOLIC_PROCESS	0.000654	0.00538195	-0.268382	-1.48453	0	334	NPR1,TCIRG1,AHCYL1,NDUFAF1,HK3,PPCS,MTRR,MPP1,COX5A,MAT2B,TAZ,OAS1,UQCR11,NDUFS7,HKDC1,NDUFA1,NDUFV3,CARD11,SULT1A2,AMPD1,UQCRB,HPRT1,PDE8A,DLD,HINT1,MCCC2,DPYD,NME6,SLC35B3,ABHD14B,CYC1,NADK,OAS2,PPCDC,ENO3,ADA,MOCS2,ADCY9,COX6C,NUDT9,COX7A2L,HTR2B,LRRK2,SULT1A1,MOCS1,ADORA2A,UQCR10,COX6B1,IL1B,ABCG2,AK4,NDUFAB1,HDDC3,UQCRFS1,CHCHD10,BAD,SLC16A9,MYH3,MCEE,MACROD1,MRI1,PANK1,ADK,UQCRC2,NDUFB11,UQ…	87	0.260479	ABCG2,ABHD14B,ACACA,ACACB,ACOT7,ACPP,ADA,ADAL,ADCY1,ADCY10,ADCY2,ADCY3,ADCY4,ADCY5,ADCY6,ADCY7,ADCY8,ADCY9,ADK,ADM,ADORA2A,ADPGK,ADSL,ADSS,ADSSL1,AHCY,AHCYL1,AHCYL2,AK1,AK2,AK3,AK4,AK5,ALDOA,ALDOB,ALDOC,AMD1,AMPD1,AMPD2,AMPD3,AOX1,APIP,APRT,AQP1,ATIC,ATP1A2,ATP1B1,ATP2B2,ATP6V0A1,ATP6V0A2,ATP6V0A4,ATP6V1A,ATP6V1B1,ATP6V1B2,BAD,BHMT,BHMT2,BPGM,BPNT1,CACNB4,CALCRL,CARD11,CASK,CAT,CHCHD10,COASY,COQ9…	Human
NCB-CB	_tstat	within each collection	BP: GO biological process	GO_REGULATION_OF_METAL_ION_TRANSPORT	0.00250156	0.0145767	-0.272611	-1.4795	3	275	B2M,AHCYL1,SCN1B,CAB39,CACNA2D4,HFE,CAMK2D,KCNE3,CCR1,LILRB1,BEST1,FMR1,P2RX5,CCL3,P2RX4,NOS3,CD4,RNF207,GLRX,CD84,GSTO1,SGK1,KCNAB2,KCNIP2,SCN4B,CAMK2G,FCRL5,CAPN3,ANO6,CLIC2,CXCL11,AMIGO1,JPH3,CASQ1,FHL1,SUMO1,MYO5A,LILRB2,SPTBN4,SLC31A2,P2RY12,TRPV3,NEDD4,P2RX7,NKAIN2,CALM3,P2RX3,PIK3CG,CORO1A,P2RX1,EGF,PTGER3,CACNA2D1,CCL4,GSTM2,CAMK2A,LYN,AGER,ORAI1,MYLK,AKAP5,CAV1,STIM1,KEL,JSRP1,TRDN,CXCL9…	122	0.443636	ABL1,ACTN2,ACTN4,ADCYAP1R1,ADORA1,ADRA2A,ADRB2,AGER,AGT,AHCYL1,AHNAK,AKAP5,AKAP6,AKAP7,AKAP9,AKT1,AMIGO1,ANK2,ANK3,ANO6,ARF1,ARRB2,ASPH,ATF4,ATG5,ATP1A1,ATP1A2,ATP1B1,ATP1B2,ATP1B3,ATP2B2,ATP2B4,B2M,BAK1,BAX,BCL2,BEST1,BMP4,CAB39,CACNA1B,CACNA1C,CACNA1D,CACNA2D1,CACNA2D3,CACNA2D4,CACNB1,CACNB2,CACNB3,CACNB4,CALM1,CALM2,CALM3,CAMK2A,CAMK2B,CAMK2D,CAMK2G,CAPN3,CASK,CASQ1,CASQ2,CAV1,CCL2,CCL3,CCL4,C…	Human
NCB-CB	_tstat	within each collection	BP: GO biological process	GO_REGULATION_OF_ERK1_AND_ERK2_CASCADE	0.00351288	0.0186193	-0.282133	-1.4729	5	204	NTRK1,CAMK2D,ARRB1,TIAM1,CCR1,RGS14,TNIP1,CD74,CCL4L2,CCL24,RASGRP1,STYX,CCL3,GPR55,C5AR1,HAVCR2,TIRAP,RAP1A,CYSLTR2,CSF1R,CSK,PTPN22,TBC1D10C,GBP1,TLR4,NOD2,TNFRSF11A,HTR2B,RIPK2,NLRP6,GCNT2,SLAMF1,IL1B,CCR7,MAPK3,CIB1,CCL8,DUSP26,XCL2,CCL4,CD36,CCL21,PTPRR,LYN,RANBP9,RAPGEF1,GPR183,PYCARD,CAV1,CCL7,PKHD1,TNFAIP8L3,CCL5,CCL23,ARRB2,THPO,RRAS,FLT4,PTPN6,LGALS9,RAPGEF2,ANGPT1,ABCA7,PTK2B,CX3CL1,P2…	76	0.372549	ABCA7,ABL1,ADIPOQ,ADRA1A,ANGPT1,APIP,ARHGAP8,ARHGEF5,ARRB1,ARRB2,ATF3,ATP6AP1,BMP2,BMP4,BMPER,BRAF,C1QL4,C3,C3orf33,C5AR1,CAMK2D,CAV1,CCL11,CCL13,CCL14,CCL15,CCL16,CCL18,CCL19,CCL2,CCL20,CCL21,CCL22,CCL23,CCL24,CCL3,CCL4,CCL4L2,CCL5,CCL7,CCL8,CCR1,CCR7,CD36,CD44,CD74,CHI3L1,CIB1,CNKSR3,CSF1R,CSK,CX3CL1,CYSLTR2,DAB2IP,DLG1,DNAJC27,DRD2,DSTYK,DUSP1,DUSP26,DUSP3,DUSP6,ECE1,EDNRA,EGFR,EPHA2,EPHA7,EPH…	Human
NCB-CB	_tstat	within each collection	BP: GO biological process	GO_METAL_ION_TRANSPORT	0.000722	0.00546749	-0.253042	-1.4527	0	460	NIPA1,TCIRG1,TMEM38B,IBTK,SLC30A5,SCN1B,CACNA2D4,ATP6V0E1,SLC30A4,HFE,CAMK2D,KCNMA1,ATOX1,KCNE3,GRIN3A,SLC24A1,CCR1,TRPM7,MICU1,REP15,SLC40A1,CCL3,ATP6V1C1,MCU,KCNB1,MMGT1,SLC9A8,GJA4,CYSLTR1,TCN2,CUTC,VDAC1,SCN4A,KCNQ4,SGK1,SLC9A9,SLC23A1,KCNAB2,KCNIP2,SCN4B,MRS2,SCN3A,LCK,SLC24A4,CAMK2G,HTR2B,MTMR6,ANO6,SLC9B2,JPH3,TRPM2,SCO2,KCNMB4,SLC5A6,SLC22A5,SLC39A3,SLC12A6,HPN,DENND5B,SLC38A11,PTPRC,IREB…	121	0.263043	ABCB11,ABCC9,ADRA1A,ANK2,ANO6,ANXA5,ANXA6,AQP1,ARMC1,ASPH,ATOX1,ATP12A,ATP13A1,ATP1A1,ATP1A2,ATP1A3,ATP1B1,ATP1B2,ATP1B3,ATP2A1,ATP2A2,ATP2A3,ATP2B1,ATP2B2,ATP2B3,ATP2B4,ATP2C1,ATP2C2,ATP6AP1,ATP6V0A1,ATP6V0A2,ATP6V0A4,ATP6V0B,ATP6V0C,ATP6V0D1,ATP6V0D2,ATP6V0E1,ATP6V0E2,ATP6V1A,ATP6V1B1,ATP6V1B2,ATP6V1C1,ATP6V1C2,ATP6V1D,ATP6V1E1,ATP6V1E2,ATP6V1F,ATP6V1G1,ATP6V1G2,ATP6V1H,ATP7A,ATP7B,BBC3,BHLHA15…	Human
NCB-CB	_tstat	within each collection	BP: GO biological process	GO_APOPTOTIC_SIGNALING_PATHWAY	0.00311333	0.0169218	-0.267386	-1.44819	4	270	MAPK9,NBN,CD40,TNFRSF14,CASP10,CASP3,SGPP1,CASP8,STK11,HTRA2,TICAM2,CD28,MAP3K5,BTK,NUPR1,TRADD,TNFSF12,G0S2,CASP4,SRGN,LY96,SMAD3,AIFM1,HINT1,P2RX4,FASLG,RPS27L,MKNK2,IL33,TLR4,TNFRSF11A,FNIP2,TNFRSF1B,SHISA5,JAK2,RIPK3,IL1B,XBP1,RIPK1,CD27,TNFRSF11B,BCL3,BLOC1S2,CD14,P2RX7,SOD2,BCL2A1,BAD,CIB1,CD3E,SPN,FASTK,CD5,TNFRSF4,TNFSF10,IL6R,TNFRSF8,TNFRSF1A,TNFRSF9,TMEM109,LAMP1,PYCARD,CAV1,TNFRSF18,CD…	87	0.322222	ABL1,ACVR1B,ADORA1,AEN,AIFM1,ANXA6,APAF1,APPL1,ARL6IP5,ATF4,ATM,ATP2A1,BAD,BAG3,BAG6,BAK1,BAX,BBC3,BCL2,BCL2A1,BCL2L1,BCL2L10,BCL2L11,BCL2L2,BCL3,BID,BLOC1S2,BMF,BNIP3,BNIP3L,BOK,BRCA1,BRCA2,BRSK2,BTK,CASP10,CASP2,CASP3,CASP4,CASP8,CASP8AP2,CASP9,CAV1,CD14,CD24,CD27,CD28,CD38,CD3E,CD40,CD5,CD70,CDKN1A,CEBPB,CHAC1,CHEK2,CIB1,CIDEB,CLU,CRADD,CRIP1,CUL1,CUL2,CUL3,CUL4A,CUL5,CYCS,CYP1B1,DAB2IP,DAP,DA…	Human
NCB-CB	_tstat	within each collection	BP: GO biological process	GO_NUCLEOSIDE_MONOPHOSPHATE_METABOLIC_PROCESS	0.00642148	0.0301847	-0.276309	-1.44135	10	200	TCIRG1,NDUFAF1,PRPS2,HK3,MPP1,COX5A,TAZ,UQCR11,NDUFS7,HKDC1,UPP1,NDUFA1,NDUFV3,CARD11,AMPD1,UQCRB,HPRT1,DLD,CYC1,NADK,ENO3,ADA,CMPK1,COX6C,NUDT9,COX7A2L,UPRT,UQCR10,COX6B1,TK2,AK4,NDUFAB1,UQCRFS1,CHCHD10,BAD,MYH3,ADK,UQCRC2,NDUFB11,UQCRQ,NDUFA6,ADPGK,DUT,DCK,NDUFA10,NDUFS6,NDUFB10,FXN,NDUFS4,NDUFS1,COX4I1,RFK,NDUFB3,NDUFA2	54	0.27	ADA,ADK,ADPGK,ADSL,ADSS,ADSSL1,AK1,AK2,AK3,AK4,AK5,ALDOA,ALDOB,ALDOC,AMPD1,AMPD2,AMPD3,APRT,ATIC,ATP1A2,ATP1B1,ATP6V0A1,ATP6V0A2,ATP6V0A4,ATP6V1A,ATP6V1B1,ATP6V1B2,BAD,BPGM,CAD,CARD11,CASK,CHCHD10,CMPK1,COQ9,COX10,COX15,COX4I1,COX5A,COX5B,COX6A1,COX6B1,COX6C,COX7A2L,COX7B,COX7C,COX8A,CTNS,CYC1,CYCS,DCK,DGUOK,DHODH,DHTKD1,DLD,DLG1,DLG2,DLG3,DLG4,DTYMK,DUT,ENO1,ENO2,ENO3,ENO4,ENTPD5,ENTPD8,FIGNL1,F…	Human
NCB-CB	_tstat	within each collection	BP: GO biological process	GO_REGULATION_OF_HOMEOSTATIC_PROCESS	0.000689	0.00544918	-0.25362	-1.42889	0	390	NBN,NPR1,B2M,IBTK,SLC30A5,SCN1B,SLC30A4,NR1H3,TMEM64,CAMK2D,PRKCQ,ARRB1,IL20RA,TIAM1,CD74,P2RX5,CCL3,COMT,NCKAP1L,GCLM,SEC24A,P2RX4,FCER1G,CD4,MAPK14,CSF1R,CSK,GSTO1,ADA,PRKAA1,LCK,TNFRSF11A,ETS1,SIGLEC15,NR1D1,FCRL5,CAPN3,HTR2B,LRRK2,CFTR,CLIC2,CXCL11,JPH3,SPI1,SLC22A5,CASQ1,RIPK3,FHL1,MYO5A,IL1B,PTPRC,PPP2R3C,INPP5D,EDNRB,CCR7,TNFRSF11B,SMAP1,SLX1A,P2RX7,CCR5,BAD,MAPK3,CALM3,CCT8,P2RX3,IL2RA,CO…	130	0.333333	ABAT,ABL1,ACD,ACOX1,ACVR1B,ACVR2A,ADA,ADAM17,ADAM8,ADCY5,ADCYAP1R1,ADORA1,ADRA2A,AGT,AGTR1,AGTR2,AKAP5,AKAP6,ANK2,ANK3,ANKRD54,ANO1,ANPEP,ANXA1,AP3D1,APLN,ARNT,ARRB1,ARRDC3,ASPH,ATG5,ATM,ATP1A2,ATP6AP1,ATR,ATRX,AURKB,AVPR1A,AVPR2,B2M,BAD,BAK1,BAX,BBC3,BCL10,BCL2,BGLAP,BMP4,BMP8A,BRSK2,C2CD2L,CA2,CACNA1C,CACNA1G,CALM1,CALM2,CALM3,CAMK2D,CAPN3,CASQ1,CASQ2,CAV1,CCL19,CCL21,CCL3,CCL5,CCR2,CCR5,CCR7,C…	Human
NCB-CB	_tstat	within each collection	BP: GO biological process	GO_LIPID_LOCALIZATION	0.00422195	0.021502	-0.269114	-1.42852	6	233	ATP11C,ACE,APOL1,DGAT1,HEXB,APOL3,APOL6,PCTP,FABP3,CPT1B,SOAT1,PLTP,VAMP7,APOL2,ATP8A1,ABCG4,ATP8A2,ACVR1C,ATP8B1,STARD4,ANO6,ABCD1,CFTR,ABCG1,ABCA1,PITPNB,ANO7,CETP,IL1B,SLC25A20,P2RX7,NOS2,SCP2,PPARG,ATP11A,SYT7,OSBPL8,ATP8B4,ABHD4,CD36,ATP8B3,ABCD2,KISS1R,CAV1,SORL1,STX12,SLCO2B1,TNFAIP8L3,GOT2,TRIAP1,CROT,OSBP,ABCA3,ACSL3,MSR1,LIPC,ABCC3,VPS4A,ATP9A,ABCB4,GM2A,FABP6,STAT5B,ABCA7,PPARA,FZD4,AC…	86	0.369099	ABCA1,ABCA10,ABCA12,ABCA13,ABCA2,ABCA3,ABCA4,ABCA5,ABCA6,ABCA7,ABCA8,ABCA9,ABCB11,ABCB4,ABCC2,ABCC3,ABCC4,ABCD1,ABCD2,ABCD3,ABCG1,ABCG4,ABCG5,ABCG8,ABHD4,ACACA,ACACB,ACE,ACSL1,ACSL3,ACSL4,ACVR1C,AGTR2,AKR1C1,AKR1C4,ALB,ANGPTL3,ANO3,ANO4,ANO6,ANO7,ANO9,ANXA1,APOA1,APOA2,APOA4,APOA5,APOB,APOBR,APOC1,APOC2,APOC3,APOC4,APOD,APOE,APOF,APOH,APOL1,APOL2,APOL3,APOL4,APOL6,APOLD1,APOM,APOO,AQP9,ARV1,ATP10…	Human
NCB-CB	_tstat	within each collection	BP: GO biological process	GO_PROTEIN_AUTOPHOSPHORYLATION	0.00512529	0.0250759	-0.2774	-1.42693	8	182	VRK2,NTRK1,CAMK2D,FES,TAOK3,MAP4K1,STK11,BLK,TRPM7,BTK,STK10,MATK,SLK,ZAP70,PTK6,MAPK14,CSF1R,CSK,ITK,JAK1,MKNK2,STK16,MAP3K11,CAMKK2,FGR,EIF2AK2,LCK,CAMK2G,LRRK2,FLT3,JAK2,RIPK3,TXK,MKNK1,RIPK1,CSNK1G2,GRK5,MAPK3,HCK,PHKA1,DAPK2,BCR,CAMK2A,PINK1,LYN,MYLK2,TRIM24,CDKL5,PIM2,PIM3,JAK3,AAK1,FLT4,CAMK2B,EIF2AK4,DAPK1,MAPKAPK3,EEF2K,PRKACA,BMX,SMG1,PTK2B,TEC,DDR2,CLK1,UHMK1	66	0.362637	AAK1,ABL1,ABL2,ACVR1B,AKT1,ALK,ATM,ATP13A2,ATR,AURKA,AURKB,BCR,BLK,BMX,BTK,CAD,CAMK2A,CAMK2B,CAMK2D,CAMK2G,CAMK4,CAMKK2,CDK12,CDK5,CDKL5,CHEK2,CLK1,CLK2,CLK3,CLK4,CSF1R,CSK,CSNK1G1,CSNK1G2,CSNK2A1,DAPK1,DAPK2,DAPK3,DDR1,DDR2,DYRK1A,EEF2K,EGFR,EIF2AK1,EIF2AK2,EIF2AK3,EIF2AK4,EIF2S1,EPHA1,EPHA4,EPHB1,EPHB3,EPHB4,ERBB2,ERBB4,ERN1,FER,FES,FGFR1,FGFR2,FGFR3,FGFR4,FGR,FLT1,FLT3,FLT4,FRK,FYN,GRK5,GSK3B,…	Human
NCB-CB	_tstat	within each collection	BP: GO biological process	GO_DIVALENT_INORGANIC_CATION_HOMEOSTASIS	0.00374065	0.0194803	-0.261243	-1.41853	5	276	CD40,IBTK,SLC30A5,SLC30A4,RAP1GDS1,TMEM64,CAMK2D,ANXA7,HEXB,SLC24A1,CCR1,C3AR1,TRPM7,MICU1,SYPL2,CCL3,MCU,C5AR1,CD52,HERPUD1,XK,CYSLTR1,XCR1,CLN3,GIPR,LCK,SLC24A4,HTR2B,JPH3,TRPM2,TMC8,JAK2,GRINA,IL1B,PTPRC,EDNRB,CCR7,SLC35G1,P2RX7,CCR5,SLC8A3,PIK3CG,CCL8,PTGER3,CACNA2D1,CCR2,RYR1,KL,CD36,MCHR1,CCL21,AGER,CAV1,CCL7,TGM2,KEL,PKHD1,CD38,CCR10,PYGM,TRDN,CYP27B1,S1PR1,CCL5,CCL23,ATP2A1,TRIM24,JAK3,TA…	96	0.347826	ABL1,ABL2,ADCY5,ADM,ADRA1A,ADRA1B,AGER,AGTR1,ANK2,ANK3,ANXA6,ANXA7,APOE,APP,ATP13A1,ATP13A2,ATP13A3,ATP13A4,ATP1A2,ATP1B1,ATP2A1,ATP2A2,ATP2A3,ATP2B1,ATP2B2,ATP2B3,ATP2B4,ATP2C1,ATP2C2,ATP6V1B1,ATP7B,AVPR1A,BAK1,BAX,BBC3,BCAP31,BCL2,BDKRB2,C1QTNF1,C3AR1,C5AR1,CACNA1A,CACNA1C,CACNA2D1,CACNB3,CACNB4,CALB1,CALB2,CALR,CAMK2D,CASQ2,CASR,CAV1,CCDC47,CCKBR,CCL11,CCL13,CCL14,CCL15,CCL19,CCL2,CCL21,CCL23,…	Human
NCB-CB	_tstat	within each collection	BP: GO biological process	GO_VACUOLE_ORGANIZATION	0.0104338	0.043652	-0.282639	-1.41591	18	151	PLEKHF1,HPS1,RAB27A,NAGPA,SNAP29,TFEB,SNX10,HEXB,VAMP8,RAB1A,VAMP7,RAB11A,VPS18,FASLG,USP8,CLN3,ATG4C,SNX33,LRRK2,WDR45,VPS28,ABCA1,MAN2A1,RAB20,ZKSCAN4,P2RX7,CORO1A,VPS37D,UVRAG,TP53INP1,SYT7,MFSD8,LYST,CLN6,TPP1,RAB14,ATG4A,STX12,ATG16L1,SNX14,GABARAPL2,ATG9A,TECPR1,MAP1LC3B,MYO7A,CHMP4C,ATG16L2,VPS4A,ATG12	49	0.324503	ABCA1,ACP2,AKTIP,ALS2,ALS2CL,ANXA8,ARF1,ARFGEF2,ARSB,ATG12,ATG13,ATG14,ATG16L1,ATG16L2,ATG2A,ATG2B,ATG3,ATG4A,ATG4B,ATG4C,ATG4D,ATG5,ATG9A,ATG9B,ATP13A2,ATP6V0C,BECN1,CHMP1A,CHMP1B,CHMP2A,CHMP2B,CHMP3,CHMP4A,CHMP4B,CHMP4C,CHMP5,CHMP6,CHMP7,CLCN3,CLN3,CLN5,CLN6,CLN8,CLVS1,CORO1A,DNAJC13,DNM1,EEA1,EPG5,EXOC8,FAM160A2,FASLG,FIG4,GAA,GABARAPL1,GABARAPL2,GNPTAB,HEXB,HGS,HOOK1,HOOK2,HOOK3,HPS1,HPS4,IST…	Human
NCB-CB	_tstat	within each collection	BP: GO biological process	GO_ORGANONITROGEN_COMPOUND_CATABOLIC_PROCESS	0.00258732	0.0148025	-0.257033	-1.40771	3	306	APOBEC3G,ACE,DDO,MTRR,HEXB,RNPEPL1,UPP1,PCBD1,ALDH5A1,COMT,CTBS,CHI3L2,SDC3,CARNS1,QPRT,HPRT1,PDE8A,DLD,HINT1,NOS3,APOBEC3F,MCCC2,DPYD,HOGA1,IDE,NEIL1,HPSE,ERAP1,ADA,OVGP1,GUSB,IVD,GGT1,NUDT9,GLUD2,HMOX2,THNSL2,OAT,APOBEC3C,PPM1K,HNMT,HYAL3,NOS2,IDS,GLA,GLUD1,ENPP2,SMPDL3A,ASRGL1,CBS,KYNU,PDE4C,TPP1,DUT,SDC4,PCYOX1,NEU4,PLA2G15,ADAL,GOT2,ERAP2,SLC44A1,ASL,HMOX1,TYMP,QDPR,CHDH,MTHFS,FUCA1,CTSH,LIP…	85	0.277778	AADAT,AASS,ABAT,ABHD12,ACAD8,ACADL,ACADSB,ACAN,ACAT1,ACE,ACE2,ACMSD,ADA,ADAL,ADAMTS13,ADO,AFMID,AGRN,AGXT,AGXT2,AHCY,ALDH1L1,ALDH1L2,ALDH4A1,ALDH5A1,ALDH6A1,ALDH7A1,ALLC,AMBP,AMDHD1,AMPD3,AMT,ANPEP,AOX1,APOBEC3A,APOBEC3C,APOBEC3F,APOBEC3G,ARG1,ARSB,ASL,ASPA,ASPDH,ASRGL1,AUH,BCAN,BCAT1,BCAT2,BCKDHA,BCKDHB,BCKDK,BGN,BHMT,BLVRA,BLVRB,CARNS1,CAT,CBS,CD44,CDA,CDO1,CHDH,CHI3L1,CHI3L2,CHID1,CHIT1,COMT,C…	Human
NCB-CB	_tstat	within each collection	BP: GO biological process	GO_ACTIVATION_OF_PROTEIN_KINASE_ACTIVITY	0.00366077	0.0191568	-0.260679	-1.40472	5	256	MAP2K1,CAB39,NTRK1,ARRB1,MAP4K1,STK11,CD74,CRKL,MAP3K5,IRAK2,FGF13,MDFIC,CHRNA3,PILRB,NKX3-1,C5AR1,NCKAP1L,TLR6,RAP1A,MAPK8IP2,GADD45A,MAP3K14,MAPK14,PRKACB,PRKAR2A,MAP3K11,EIF2AK2,ADCY9,PRKAA1,TLR4,NOD2,TAOK2,LRRK2,RIPK2,STRADB,CARD10,JAK2,RIPK3,ADRA2B,IL1B,PPP2R3C,RIPK1,ZFP91,P2RX7,MAP2K5,CD40LG,MAPK3,MAP3K15,EGF,OSBPL8,TNFSF15,MAPK11,TAB2,MAPK1,PINK1,SOD1,RAPGEF1,KISS1R,DUSP5,ADAM8,IKBKG,ADCY7…	86	0.335938	ABL1,ACVR2B,ADAM8,ADAM9,ADCY1,ADCY2,ADCY3,ADCY4,ADCY5,ADCY6,ADCY7,ADCY8,ADCY9,ADNP,ADORA1,ADORA2B,ADRA2A,ADRA2B,ADRA2C,ADRB2,ALK,ANG,ANGPT1,ARRB1,AVPI1,AXIN1,BIRC7,BMP2,BMP4,BRAF,C1QTNF2,C5,C5AR1,CAB39,CAMKK1,CARD10,CARD14,CCDC88A,CCL19,CD40LG,CD74,CD81,CDK1,CHI3L1,CHRNA3,CHRNA7,CLSPN,COPS8,CRK,CRKL,CSPG4,CXCR4,DAB2IP,DAXX,DBF4B,DBNL,DLG1,DRD2,DRD4,DUSP19,DUSP5,DUSP6,DUSP7,DUSP9,ECT2,EFNA1,EFNA5,…	Human
NCB-CB	_tstat	within each collection	BP: GO biological process	GO_NUCLEOSIDE_TRIPHOSPHATE_METABOLIC_PROCESS	0.00862565	0.0379528	-0.271129	-1.40067	14	187	TCIRG1,NDUFAF1,HK3,COX5A,RRM2B,TAZ,UQCR11,NDUFS7,HKDC1,NDUFA1,NDUFV3,SUCLG1,UQCRB,DLD,NME6,CYC1,NADK,ENPP3,ENO3,ADA,CMPK1,MOCS2,COX6C,COX7A2L,LRRK2,MOCS1,UQCR10,CMPK2,COX6B1,AK4,NDUFAB1,UQCRFS1,CHCHD10,BAD,MYH3,ADK,UQCRC2,SMPDL3A,NDUFB11,UQCRQ,NDUFA6,ADPGK,DUT,NDUFA10,NDUFS6,NDUFB10,FXN,NDUFS4,MOCOS,NDUFS1,COX4I1	51	0.272727	ADA,ADK,ADPGK,AK1,AK2,AK3,AK4,AK5,AK7,AK8,ALDOA,ALDOB,ALDOC,AMPD2,AMPD3,ATP1A2,ATP1B1,ATP6V0A1,ATP6V0A2,ATP6V0A4,ATP6V1A,ATP6V1B1,ATP6V1B2,BAD,BPGM,CAD,CHCHD10,CMPK1,CMPK2,COQ9,COX10,COX15,COX4I1,COX5A,COX5B,COX6A1,COX6B1,COX6C,COX7A2L,COX7B,COX7C,COX8A,CTNS,CTPS2,CYC1,CYCS,DCTPP1,DGUOK,DHTKD1,DLD,DTYMK,DUT,ENO1,ENO2,ENO3,ENO4,ENPP1,ENPP3,ENTPD3,ENTPD5,FIGNL1,FXN,GALK1,GAPDH,GCK,GNAI3,GPHN,GPI,GU…	Human
NCB-CB	_tstat	within each collection	BP: GO biological process	GO_MUSCLE_SYSTEM_PROCESS	0.00666667	0.0310663	-0.261388	-1.39519	10	243	CAMTA2,PSMB9,SCN1B,CAMK2D,KCNMA1,TAZ,TIAM1,CHRNB4,TMOD3,IL15,SNTB1,TTN,P2RX4,NOS3,RCSD1,PDLIM5,MB,SCN4A,HTR7,SMPX,ATP8A2,KCNIP2,SCN4B,MYH2,STAC3,MYH1,HTR2B,CRYAB,SCO2,DYSF,MYL1,MEF2C,IL1B,EDNRB,EMD,CALM3,P2RX3,MYH3,MYBPC1,TMOD2,PTGER3,NMUR1,CACNA2D1,RYR1,MYOG,GSTM2,TACR2,CHRNB1,MYOT,SGCE,SLMAP,ATP1A3,SOD1,MYLK,MYLK2,NDUFS6,JSRP1,PXN,TRDN,CKMT2,HMOX1,MYLPF,ATP2A1,GAMT,STBD1,TACR1,CYBA,MYOM2,GJA5,N…	89	0.366255	ACTA1,ACTA2,ACTC1,ACTG2,ACTN2,ADORA1,ADORA2B,ADRA1A,ADRB2,AGT,AGTR2,ALDOA,ANK2,ANKRD2,ARG2,ARHGEF11,ASPH,ATP1A1,ATP1A2,ATP1A3,ATP1B1,ATP2A1,ATP2A2,ATP8A2,BBS2,BDKRB2,CACNA1C,CACNA1H,CACNA2D1,CACNB2,CALD1,CALM1,CALM2,CALM3,CAMK2D,CAMTA2,CASQ2,CCDC78,CFLAR,CHGA,CHRM3,CHRNA1,CHRNB1,CHRNB4,CHRND,CHRNE,CHUK,CKMT2,COL4A3BP,CRYAB,CXCR4,CYBA,DES,DLG1,DMD,DMPK,DRD1,DRD2,DTNA,DYSF,EDN1,EDN2,EDN3,EDNRA,EDNR…	Human
NCB-CB	_tstat	within each collection	BP: GO biological process	GO_REGULATION_OF_ION_TRANSPORT	0.000736	0.00553416	-0.239708	-1.38032	0	473	MAPK9,B2M,HVCN1,AHCYL1,SLC30A5,SCN1B,CAB39,CACNA2D4,PPIF,HFE,CAMK2D,KCNMA1,KCNE3,CCR1,LILRB1,VAMP8,BEST1,CYBB,FMR1,P2RX5,CCL3,CHRNA3,KCNB1,VAMP7,P2RX4,NOS3,CTSS,ATP8A1,CD4,MAPK8IP2,VDAC1,RNF207,SCN4A,GLRX,CD84,GSTO1,KCNQ4,ATP8A2,SGK1,KCNAB2,DTNBP1,KCNIP2,SCN4B,SCN3A,CAMK2G,TNFRSF11A,FCRL5,CAPN3,ANO6,CFTR,CLIC2,CXCL11,AMIGO1,JPH3,SNCG,CASQ1,FHL1,SUMO1,MEF2C,MYO5A,LILRB2,IL1B,SPTBN4,RIPK1,SNX6,SLC3…	190	0.401691	ABAT,ABCA7,ABCB4,ABL1,ACSL4,ACTN2,ACTN4,ADCYAP1R1,ADORA1,ADRA2A,ADRB2,AGER,AGT,AGTR2,AHCYL1,AHNAK,AKAP5,AKAP6,AKAP7,AKAP9,AKT1,AKT2,AMIGO1,ANK2,ANK3,ANO1,ANO6,ANO9,APOE,ARC,ARF1,ARG1,ARL6IP1,ARL6IP5,ARRB2,ASPH,ATF4,ATG5,ATP1A1,ATP1A2,ATP1B1,ATP1B2,ATP1B3,ATP2B2,ATP2B4,ATP8A1,ATP8A2,AVPR1A,B2M,BAK1,BAX,BCL2,BEST1,BMP4,BSND,CA2,CAB39,CACNA1A,CACNA1B,CACNA1C,CACNA1D,CACNA1E,CACNA1F,CACNA1G,CACNA1H,C…	Human
NCB-CB	_tstat	within each collection	BP: GO biological process	GO_PROTEIN_MATURATION	0.007242	0.03308	-0.258673	-1.37884	11	239	MAPK9,OMA1,CTSE,ACE,CASP3,CASP8,HTRA2,TSPAN33,TRADD,SRGN,SMAD3,AIFM1,NKX3-1,CTSS,IDE,FASLG,RPS27L,CASP7,PRDX4,SPPL2A,CASP1,CLN3,LCK,GGT1,ATG4C,GZMB,BCL2L13,JAK2,REN,GZMH,ACER2,RIPK1,TBC1D10A,P2RX7,ADAM10,CAPN2,BAD,PPARG,P2RX1,UQCRC2,TNFSF15,TNFSF10,TYSND1,NLRP3,PYCARD,ATG4A,SORL1,BID,FXN,CPE,BCL2L10,NLRC4,DAP,ISCU,CTSH,BAK1,ADAMTS13,PML,UQCRC1,IFI16,AGA,FAS,BBC3,DNAJA3,S100A9,CPM,IFI27,SPCS3,IMMP…	82	0.343096	ACE,ACE2,ACER2,ADAM10,ADAMTS13,ADAMTS2,ADAMTS3,AEBP1,AFG3L2,AGA,AGT,AIFM1,AIP,ANP32B,APAF1,APH1A,APH1B,APOH,ASPH,ASPRV1,ATG4A,ATG4B,ATG4C,ATG4D,ATP6AP2,BACE2,BAD,BAK1,BAX,BBC3,BCL2L10,BCL2L11,BCL2L13,BGLAP,BID,BOK,C2CD3,CALR,CAPN1,CAPN2,CARD8,CASP1,CASP2,CASP3,CASP7,CASP8,CASP8AP2,CASP9,CDKN1B,CDKN2A,CHCHD4,CIDEB,CLN3,CLN5,COL4A3,CORIN,CPA3,CPD,CPE,CPM,CPN1,CPXM1,CPXM2,CPZ,CRADD,CTSE,CTSG,CTSH,CT…	Human
NCB-CB	_tstat	within each collection	BP: GO biological process	GO_CELLULAR_RESPONSE_TO_LIPID	0.00278164	0.0155368	-0.242719	-1.37292	3	400	MAPK9,CD40,NFKB1,B2M,PAQR5,P2RY6,NR1H3,TRIP4,RNF14,PIAS1,LILRB1,HTRA2,TICAM2,MLC1,IRAK2,UBE3A,CCL3,IL15,STAP1,ESRRA,NR3C1,IL10,DEFA1,LY96,AIFM1,CD180,NKX3-1,CD86,IRF8,HAVCR2,NOS3,UBE2L3,PTK6,MAPK14,NTS,MED16,SGK1,SERPINB9,PTPN22,PRKAA1,TLR4,TNIP3,NCOA4,NR1D1,MTDH,CD80,RIPK2,FLT3,TNFRSF1B,ABCA1,CMPK2,JAK2,KLRK1,THRB,MED30,TLR2,MEF2C,LILRB2,IL1B,ABCG2,XBP1,EDNRB,IL18,CD14,CD6,UGT3A2,NEDD4,LTK,NOS2,…	96	0.24	AACS,ABCA1,ABCB4,ABCG2,ABHD2,ABL1,ABL2,ACACA,ACVR1,ADAM9,ADAMTS1,ADCY1,ADCY2,ADCY3,ADCY5,ADCY6,ADNP2,AGER,AGTR2,AHR,AIFM1,AKR1C2,AKR1C3,AKT1,ALDH1A2,ANXA1,APOB,AQP1,AR,ARG1,ARID1A,ASS1,ATP1A1,ATP1A2,ATP1A3,ATP2B1,AXL,B2M,BAD,BCAS3,BGLAP,BMP4,BMP7,BRCA1,BYSL,CALCOCO1,CALR,CARM1,CASP9,CBX3,CCDC62,CCL2,CCL20,CCL3,CCL5,CCNA2,CCNB1,CCNE1,CCR5,CD14,CD180,CD36,CD40,CD6,CD80,CD86,CDC73,CDK19,CDK7,CEBPB,C…	Human
NCB-CB	_tstat	within each collection	BP: GO biological process	GO_LIPID_CATABOLIC_PROCESS	0.0104895	0.0438283	-0.261678	-1.3716	17	209	HSD17B14,PLCD4,PLA2G4C,HEXB,MGLL,SESN2,LPIN3,PLCB2,HADHB,FABP3,DECR1,CPT1B,ETFA,STS,IVD,HADHA,PLBD1,LIPE,HADH,ABCD1,CYP26C1,ENPP6,SCP2,AKR1B10,CRAT,PEX7,PLA2G2D,GLA,MCEE,ENPP2,SMPDL3A,ABHD4,ABCD2,FAAH,PLA1A,SIRT2,NEU4,ECHS1,ACADS,PLA2G15,CYP27B1,CROT,NAPEPLD,ACAD11,LIPC,LPIN2,HSD17B11,BDH2,ECI2,PLD4,AMACR,GM2A,ECI1,NAGA,SRD5A3,FABP6,SCARF1,PEX13,ACAA1,NUDT19,CPT1A,ECH1,SGPL1,LIPA,CYP1B1,HSD17B4,C…	83	0.397129	ABCD1,ABCD2,ABCD3,ABHD12,ABHD2,ABHD4,ABHD6,ACAA1,ACAD10,ACAD11,ACAD8,ACAD9,ACADL,ACADM,ACADS,ACADSB,ACADVL,ACOT8,ACOX1,ACOX2,ACOX3,ACOXL,ADIPOQ,ADORA1,AKR1B10,AKR1C3,AKR1D1,ALDH3A2,AMACR,ANGPTL3,APOA1,APOA2,APOA4,APOA5,APOB,APOC2,APOC3,APOE,ASPG,BCO2,BDH2,BSCL2,CEL,CPS1,CPT1A,CPT1B,CPT1C,CPT2,CRABP1,CRAT,CROT,CYP1A2,CYP1B1,CYP24A1,CYP26A1,CYP26B1,CYP26C1,CYP27B1,CYP39A1,CYP3A4,CYP46A1,CYP4A11,CYP…	Human
NCB-CB	_tstat	within each collection	BP: GO biological process	GO_MONOCARBOXYLIC_ACID_METABOLIC_PROCESS	0.0021322	0.012817	-0.238204	-1.36163	2	443	HK3,DDO,PLA2G4C,MGLL,RNPEPL1,HSD3B7,ECHDC2,HKDC1,SESN2,CD74,ALDH5A1,LPIN3,CBR1,HADHB,FABP3,DECR1,ACOT4,CPT1B,TBXAS1,DLD,ETFA,STAT5A,MCAT,MCCC2,TMLHE,HOGA1,MAPK14,ENO3,PRDX4,FADS3,ATP8B1,ACSS2,PRKAA1,IVD,ACSL5,HADHA,SLC16A1,GGT1,LIPE,ME3,HADH,ABCD1,CYP26C1,THNSL2,THEM4,ALOX5,SLC5A6,HSD17B12,SLC22A5,MYO5A,NDUFAB1,VNN2,XBP1,HLCS,ACSM3,UGT3A2,SCP2,CRAT,PEX7,MAPK3,PPARG,MCEE,PECR,PTGDS,PTGR1,KYNU,QKI,…	178	0.401806	AACS,AASDH,AASDHPPT,ABAT,ABCB11,ABCC1,ABCD1,ABCD2,ABCD3,ABHD10,ABHD5,ACAA1,ACAA2,ACACA,ACACB,ACAD10,ACAD11,ACAD8,ACAD9,ACADL,ACADM,ACADS,ACADSB,ACADVL,ACLY,ACMSD,ACOT1,ACOT11,ACOT12,ACOT2,ACOT4,ACOT7,ACOT8,ACOX1,ACOX2,ACOX3,ACOXL,ACSF2,ACSF3,ACSL1,ACSL3,ACSL4,ACSL5,ACSL6,ACSM1,ACSM2A,ACSM2B,ACSM3,ACSM5,ACSS1,ACSS2,ADIPOQ,ADIPOR1,ADIPOR2,ADPGK,AGMO,AGXT,AGXT2,AKR1A1,AKR1C1,AKR1C2,AKR1C3,AKR1C4,AKR…	Human
NCB-CB	_tstat	within each collection	BP: GO biological process	GO_CELLULAR_CHEMICAL_HOMEOSTASIS	0.00146199	0.0096099	-0.235612	-1.35433	1	468	CD40,TCIRG1,IBTK,SLC30A5,ATP6V0E1,HK3,RAP1GDS1,TMEM64,HFE,CAMK2D,KCNMA1,ATOX1,POLG,ANXA7,HEXB,SLC24A1,CCR1,SLC26A4,C3AR1,HKDC1,SESN2,TRPM7,MICU1,SLC6A12,SYPL2,SLC40A1,CCL3,ATP6V1C1,MCU,KCNB1,SLC9A8,C5AR1,CD52,HERPUD1,XK,CYSLTR1,RAP1A,TTC7A,FASLG,SGK1,XCR1,CLN3,GIPR,LCK,SLC24A4,HTR2B,LRRK2,CFTR,HMOX2,JPH3,TRPM2,PTPRN2,SCO2,JAK2,GRINA,IL1B,ABCG2,PTPRC,RAB20,XBP1,EDNRB,CCDC22,IREB2,CCR7,SLC31A2,ATP6…	144	0.307692	AACS,ABCB6,ABCB7,ABCC2,ABCG2,ABL1,ABL2,ACO1,ADCY5,ADM,ADRA1A,ADRA1B,AGER,AGT,AGTR1,AGTR2,ALAS2,ANK2,ANXA6,ANXA7,APOC3,APOE,APP,AQP1,AQP3,AQP4,AQP5,AQP6,AQP7,AQP9,ARF1,ATOX1,ATP12A,ATP13A1,ATP13A2,ATP13A3,ATP13A4,ATP1A1,ATP1A2,ATP1A3,ATP1B1,ATP1B2,ATP1B3,ATP2A1,ATP2A2,ATP2A3,ATP2B1,ATP2B2,ATP2B3,ATP2B4,ATP2C1,ATP2C2,ATP6V0A1,ATP6V0A2,ATP6V0A4,ATP6V0B,ATP6V0C,ATP6V0D1,ATP6V0D2,ATP6V0E1,ATP6V0E2,ATP…	Human
NCB-CB	_tstat	within each collection	BP: GO biological process	GO_REGULATION_OF_VESICLE_MEDIATED_TRANSPORT	0.00424028	0.0215614	-0.237374	-1.34509	5	416	B2M,MAP2K1,RAB27A,CADPS2,TBC1D1,TBC1D9B,STX1B,C2,NR1H3,HFE,FES,ARRB1,TBC1D12,IL4R,BLK,LILRB1,VAMP8,RDX,BIN1,FMR1,STAP1,KCNB1,RAB9A,EHD1,C2CD4B,NCKAP1L,RNF139,DOC2A,VAMP7,RAB11A,DAB2,FCER1G,SYNJ1,VPS18,RAP1A,ZAP70,ANKFY1,TBC1D4,CSK,CD84,SEC24B,RUFY1,NAPA,ADPRH,FGR,STXBP5,PRKAA1,TBC1D10C,DOCK2,RAC2,SNX33,LRRK2,ANO6,CD300A,CFTR,VPS28,TBC1D8,PACSIN2,TBC1D25,SLAMF1,IL1B,SNX6,UBQLN2,SMAP1,SFTPD,CD14,TB…	139	0.334135	AAK1,ABCA7,ABL1,ABL2,ABR,ACSL3,ACTN2,ACTN4,ADIPOQ,ADORA2B,ADPRH,ADPRHL1,ADRA2A,AGER,AHI1,AHSG,AKT2,ANGPT1,ANKFY1,ANKRD27,ANO6,ANXA1,ANXA13,ANXA2,AP1G1,AP2S1,APOA5,APOC1,APOC2,APOC3,ARF1,ARF6,ARFGAP1,ARRB1,ARRB2,ATAD1,ATP13A2,ATP2A2,ATP6AP1,ATXN2,AXL,B2M,B4GALT1,BCR,BET1L,BICD1,BIN1,BLK,BRAF,BTBD9,BVES,C12orf4,C2,C2CD4A,C2CD4B,C2CD4D,C3,C4A,C4B,C4BPA,C4BPB,CACNA1A,CACNA1G,CACNA1H,CACNA1I,CADPS2,CA…	Human
NCB-CB	_tstat	within each collection	BP: GO biological process	GO_CIRCULATORY_SYSTEM_PROCESS	0.0108005	0.0448381	-0.244919	-1.33866	16	297	NPR1,RENBP,SCN1B,PTPRO,ACE,CAMK2D,KAT2B,PRKCQ,TAZ,C3AR1,VEGFC,NCALD,TTN,GCLM,P2RX4,NOS3,CYSLTR1,HTR7,NTS,SGK1,ERAP1,FLI1,SCN4B,HTR2B,EPB41,ADORA2A,TBC1D8,ALOX5,KCNMB4,MYL1,ADRA2B,REN,EDNRB,ACSM3,SOD2,NOS2,PPARG,P2RX1,PTGER3,CACNA2D1,XCL2,PTAFR,TACR2,BCR,ATP1A3,SOD1,GCH1,MYLK2,CAV1,MEOX2,ACVRL1,KEL,RAMP3,CD38,TRDN,HRH2,ERAP2,HMOX1,TACR1,ADM2,HEG1,SLC2A5,AVPR1A,CYBA,TBXA2R,GJA5,NOS1,ANGPT1,KCNK6,MY…	111	0.373737	ABAT,ABR,ACE,ACE2,ACSM3,ACTA2,ACTC1,ACVRL1,ADAMTS16,ADCY6,ADH5,ADIPOQ,ADM,ADM2,ADORA1,ADORA2A,ADORA2B,ADRA1A,ADRA1B,ADRA2A,ADRA2B,ADRA2C,ADRB1,ADRB2,AGT,AGTR1,AGTR2,AGTRAP,AKAP13,AKT1,ALOX5,AMOT,ANGPT1,ANK2,APLN,APOE,ARHGAP35,ATG5,ATP1A1,ATP1A2,ATP1A3,ATP1B1,ATP6AP2,AVPR1A,AVPR2,BBS2,BBS4,BCR,BDKRB2,BMPR2,C3AR1,CACNA1B,CACNA1C,CACNA2D1,CACNB2,CAMK2D,CASQ2,CAV1,CD34,CD38,CDC42,CHD7,CHGA,CHRM3,CNR1…	Human
NCB-CB	_tstat	within each collection	BP: GO biological process	GO_MONOVALENT_INORGANIC_CATION_TRANSPORT	0.0115533	0.0471164	-0.241633	-1.33149	17	321	SNAP23,SLC15A3,TCIRG1,HVCN1,TMEM38B,SCN1B,ATP6V0E1,KCNMA1,COX5A,KCNE3,UQCR11,SLC24A1,ATP6V1C1,KCNB1,SLC9A8,UQCRB,CPT1B,FCER1G,SCN4A,KCNQ4,SGK1,SLC9A9,SLC23A1,KCNAB2,ADA,SLC2A13,KCNIP2,SCN4B,SCN3A,COX6C,SLC24A4,COX7A2L,MTMR6,SLC22A3,ANO6,SLC9B2,TRPM2,UQCR10,KCNMB4,SLC5A6,SLC22A5,COX6B1,SLC12A6,HPN,SLC38A11,SLC25A20,ATP6V1E1,P2RY12,SLC9A7,KCNC4,UQCRFS1,SLC12A3,SLC12A8,SLC8A3,P2RX1,SLC12A7,KLHL3,HCN…	79	0.246106	ABCB11,ABCC9,ACACA,ACACB,ADA,ANO6,AQP1,ATP12A,ATP1A1,ATP1A2,ATP1A3,ATP1B1,ATP1B2,ATP1B3,ATP6AP1,ATP6AP1L,ATP6V0A1,ATP6V0A2,ATP6V0A4,ATP6V0B,ATP6V0C,ATP6V0D1,ATP6V0D2,ATP6V0E1,ATP6V0E2,ATP6V1A,ATP6V1B1,ATP6V1B2,ATP6V1C1,ATP6V1C2,ATP6V1D,ATP6V1E1,ATP6V1E2,ATP6V1F,ATP6V1G1,ATP6V1G2,ATP6V1H,CDK2,CDKN1B,CNGA1,CNGB1,CNGB3,CNNM4,COMMD3,COMMD9,COX10,COX11,COX15,COX4I1,COX5A,COX5B,COX6A1,COX6B1,COX6B2,COX…	Human
NCB-CB	_tstat	within each collection	BP: GO biological process	GO_POSITIVE_REGULATION_OF_MAPK_CASCADE	0.00486449	0.0239448	-0.234822	-1.33045	6	407	CD40,MAP2K1,TNFRSF14,NTRK1,CAMK2D,ARRB1,FGD2,TIAM1,CCR1,TAOK3,MAP4K1,BANK1,UNC5CL,CD74,CRKL,CCL4L2,CCL24,MAP3K5,RASGRP1,IRAK2,CCL3,GPR55,MDFIC,C5AR1,TLR6,HAVCR2,TIRAP,RAP1A,CYSLTR2,MAPK8IP2,GADD45A,MAP3K14,MAPK14,CSF1R,CSK,TPD52L1,MAP3K11,EIF2AK2,PTPN22,PRKAA1,TLR4,NOD2,TNFRSF11A,TAOK2,HTR2B,LRRK2,RIPK2,FLT3,TNFRSF1B,JAK2,GCNT2,ADRA2B,SLAMF1,CAV2,IL1B,RIPK1,CD27,CCR7,TNFRSF11B,P2RX7,MAP2K5,LTBR,C…	129	0.316953	ABCA7,ABL1,ADAM8,ADAM9,ADORA1,ADORA2B,ADRA1A,ADRA1B,ADRA2A,ADRA2B,ADRA2C,ADRB2,ALK,ANGPT1,ANKRD6,ARHGAP8,ARHGEF5,ARL6IP5,ARRB1,ARRB2,ATP6AP1,AVPI1,AXIN1,BANK1,BIRC7,BMP2,BMP4,BMPER,BRAF,C1QTNF1,C1QTNF2,C3,C5,C5AR1,CAMK2D,CARD9,CAV2,CCL11,CCL13,CCL14,CCL15,CCL16,CCL18,CCL19,CCL2,CCL20,CCL21,CCL22,CCL23,CCL24,CCL3,CCL4,CCL4L2,CCL5,CCL7,CCL8,CCR1,CCR7,CD24,CD27,CD36,CD40,CD40LG,CD44,CD74,CD81,CDC42,…	Human
NCB-CB	_tstat	within each collection	BP: GO biological process	GO_INORGANIC_ION_TRANSMEMBRANE_TRANSPORT	0.00844476	0.0373092	-0.226507	-1.29339	11	439	TCIRG1,TMEM38B,IBTK,SLC30A5,SCN1B,CACNA2D4,ATP6V0E1,SLC30A4,KCNMA1,ATOX1,COX5A,KCNE3,APOL1,GRIN3A,UQCR11,SLC24A1,SLC26A4,TRPM7,MICU1,BEST1,SLC40A1,CCL3,ATP6V1C1,MCU,KCNB1,SLC9A8,UQCRB,CPT1B,SCN4A,KCNQ4,SLC9A9,SLC23A1,KCNAB2,KCNIP2,SCN4B,SCN3A,LCK,COX6C,SLC24A4,COX7A2L,SLC1A4,HTR2B,MTMR6,SLC22A3,ANO6,CFTR,CLIC2,SLC9B2,JPH3,TRPM2,UQCR10,SLC37A1,KCNMB4,ANO7,SLC22A5,COX6B1,SLC39A3,SLC12A6,HPN,DENND5B…	91	0.207289	ABCB11,ABCC9,ACACA,ACACB,ADAMTS8,ANKH,ANO1,ANO10,ANO2,ANO3,ANO4,ANO5,ANO6,ANO7,ANO8,ANO9,ANXA5,APOL1,AQP1,ASPH,ATOX1,ATP12A,ATP13A1,ATP1A1,ATP1A2,ATP1A3,ATP1B1,ATP1B2,ATP1B3,ATP2A1,ATP2A2,ATP2A3,ATP2B1,ATP2B2,ATP2B3,ATP2B4,ATP2C1,ATP2C2,ATP6AP1,ATP6AP1L,ATP6V0A1,ATP6V0A2,ATP6V0A4,ATP6V0B,ATP6V0C,ATP6V0D1,ATP6V0D2,ATP6V0E1,ATP6V0E2,ATP6V1A,ATP6V1B1,ATP6V1B2,ATP6V1C1,ATP6V1C2,ATP6V1E1,ATP6V1E2,ATP6…	Human
NCB-CB	_tstat	within each collection	BP: GO biological process	GO_ORGANIC_HYDROXY_COMPOUND_METABOLIC_PROCESS	0.00707714	0.0326032	-0.227617	-1.29291	9	424	CYP11A1,NPR1,COQ2,PPIP5K1,SULT1A4,SGPP1,IP6K3,OCRL,PLA2G4C,APOL1,DGAT1,HSD3B7,FDX1,LPIN3,COMT,PLCB2,INPP4B,SULT1A2,HPRT1,SOAT1,PLTP,SGMS1,APOL2,TMLHE,IPMK,SYNJ1,INPP1,CHPT1,CLN3,ATP8B1,ACSS2,PRKAA1,PLBD1,LIPE,HTR2B,CFTR,NSDHL,SULT1A1,ABCG1,ABCA1,DHRS4,ENPP6,PHOSPHO1,SLC22A5,CETP,ITPKA,MYO5A,ACER2,INPP5D,IP6K1,ACER3,MBOAT1,SCP2,AKR1B10,CRAT,SGMS2,PLA2G2D,CALM3,EBP,PNPO,PECR,PTAFR,ENPP2,SMPDL3A,GCN…	132	0.311321	ABCA1,ABCB11,ABCG1,ABHD3,ACAA1,ACAA2,ACADL,ACADM,ACER2,ACER3,ACHE,ACLY,ACOT8,ACOX2,ACSS1,ACSS2,ADH1A,ADH1B,ADH1C,ADH4,ADH5,ADH6,AGTR2,AKR1B1,AKR1B10,AKR1C1,AKR1C3,AKR1C4,AKR1D1,ALDH1A1,ALDH1A2,ALDH1A3,ALDH1B1,ALDH2,ALDH3A2,ALDH3B1,ALDH3B2,ALDH7A1,ALDH9A1,ALG5,AMACR,ANGPTL3,AOC2,APOA1,APOA2,APOA4,APOA5,APOB,APOBR,APOC1,APOE,APOF,APOL1,APOL2,APP,ARV1,ATP2B2,ATP7A,ATP8B1,BAAT,BBOX1,BCHE,BCL2,BHMT,BT…	Human
NCB-CB	_tstat	within each collection	BP: GO biological process	GO_REGULATION_OF_BODY_FLUID_LEVELS	0.011236	0.0462304	-0.226335	-1.28615	15	420	CD40,NPR1,CAPZA2,RAB27A,PTPRO,NR1H3,USF2,VAV1,PRKCQ,IRF2,ARRB1,ANXA7,GATA5,IRF1,VAMP8,P2RX5,SH2B3,GP1BA,EHD1,DOCK9,LAT,PLEK,STAT5A,P2RX4,NOS3,RAB11A,FCER1G,WAS,ZAP70,C1GALT1C1,HPSE,PRKACB,DOCK8,PRKAR2A,DGKE,ADA,DTNBP1,FLI1,ADCY9,STXBP5,LCK,TLR4,RAC2,DOCK11,UPRT,ANO6,ADORA2A,NLRP6,PRKCH,SELP,JAK2,ADRA2B,TXK,XBP1,EDNRB,FERMT3,P2RY12,P2RX7,METAP1,CD40LG,MAPK3,P2RX3,PIK3CG,AXL,P2RX1,PIK3R5,PTGER3,LCP…	118	0.280952	A2M,ABAT,ABCA12,ACTB,ACTG1,ACTN1,ADA,ADAMTS13,ADAMTS18,ADCY1,ADCY2,ADCY3,ADCY4,ADCY5,ADCY6,ADCY7,ADCY8,ADCY9,ADORA1,ADORA2A,ADRA2A,ADRA2B,ADRA2C,ADRB2,AGR2,AK3,AKAP1,AKAP10,AKT1,ANO6,ANXA2,ANXA5,ANXA7,ANXA8,AP3B1,APLN,APLNR,APOE,APOH,APRT,AQP1,AQP3,AQP4,AQP5,ARRB1,ARRB2,ATG5,ATP2B2,ATP7A,ATP7B,AVPR2,AXL,BLOC1S3,BTC,C1GALT1C1,C1QBP,C1QTNF1,C3,C4BPB,CAD,CAPZA1,CAPZA2,CAPZB,CAV1,CBX5,CCND1,CD177,CD3…	Human
NCB-CB	_tstat	within each collection	BP: GO biological process	GO_IN_UTERO_EMBRYONIC_DEVELOPMENT	0.00645351	0.0302473	0.274426	1.39898	21	284	PCGF2,ITGB1,PTCH1,KIDINS220,TRIM28,HOPX,ANKRD11,NEK2,E2F7,B9D1,GINS1,BPTF,CDKN1C,FBXW8,CNOT3,GLI2,MIB1,LEF1,CHD8,RAD51B,GINS4,WNT3A,FUT8,MSX1,MYH10,PLCG1,ST14,TET1,MED21,COPS3,KDM1A,SENP2,E2F8,DNAJB6,TMEM100,BRCA2,HS6ST1,NASP,HAND2,FLCN,SMAD2,MDFI,CTR9,XAB2,WDR19,TWIST1,GLI3,C2CD3,EGFR,KRT19,FGFR1,POLG2,SLC34A2,PLK4,RPGRIP1L,SOX17,ALKBH1,NOTCH1,XRCC2,MAPK8IP3,ENO1,SKIL,SPINT1,SP3,HES1,SMO,CCNB2,R…	103	0.362676	ACVR1,ACVR1B,ACVRL1,ADA,ADAM10,ADAR,ADD1,ADM,AKT1,ALKBH1,ALS2,AMOT,ANGPT1,ANKRD11,APBA1,APBA2,APBA3,APOB,ARNT,ARNT2,ASCL2,ATP7A,B9D1,BCL2L1,BCL2L11,BIRC6,BMP2,BMPR1A,BPTF,BRCA2,BRK1,BTF3,BYSL,C2CD3,C5,C6,CAPN2,CASP8,CCM2,CCNB1,CCNB1IP1,CCNB2,CDKN1C,CEBPA,CEBPB,CHD7,CHD8,CNOT2,CNOT3,COL4A3BP,COPS3,CTNNB1,CTR9,CUL3,CUL4A,DAD1,DNAJB6,E2F7,E2F8,EDN1,EDNRA,EGFL8,EGFR,EGLN1,EIF2S2,EIF4E2,ELF3,ELL,ENDOG…	Human
NCB-CB	_tstat	within each collection	BP: GO biological process	GO_RIBONUCLEOPROTEIN_COMPLEX_BIOGENESIS	0.00196464	0.0120284	0.265573	1.39924	6	403	TGS1,LSG1,SFSWAP,ZNF658,RPS20,SNRNP200,PTBP2,FTSJ3,SHQ1,POLR2D,CDC40,TSC1,XRN2,UTP6,PRPF3,RPF2,DDX27,SF3B1,RPL38,LUC7L,NOL6,RPL36,CRNKL1,SART3,CNOT7,CELF4,CSNK1E,ISG20L2,SNRPB,CDKN2A,WDR75,EIF3F,UTP20,RPS5,CSNK1D,RPS27,SNRPD1,TEX10,DDX47,RPL28,RPL23,AATF,GNL2,DIS3L2,MPHOSPH6,NOC2L,SNRPE,WBP11,ERAL1,XAB2,NSUN3,EIF4A3,CELF1,RPL23A,RRP36,RPL27,LUC7L3,RPS28,ISY1,DDX52,RPS21,EXOSC10,SRSF5,SF3A3,EIF3G,…	137	0.33995	AATF,ABCF1,ABT1,ADAR,ATXN2,ATXN2L,BICD1,BMS1,BOP1,BRIX1,BYSL,C1D,C1QBP,CD2BP2,CDC123,CDC40,CDKN2A,CELF1,CELF4,CHD7,CIRBP,CLNS1A,CLP1,CNOT7,CRNKL1,CSNK1D,CSNK1E,DCAF13,DDX1,DDX20,DDX21,DDX23,DDX27,DDX28,DDX31,DDX39B,DDX3X,DDX47,DDX49,DDX51,DDX52,DDX56,DDX6,DENR,DHX30,DHX37,DICER1,DIMT1,DIS3,DIS3L,DIS3L2,DKC1,DROSHA,DYNC1H1,EBNA1BP2,EDC3,EIF2A,EIF2D,EIF2S3,EIF3A,EIF3B,EIF3C,EIF3CL,EIF3D,EIF3E,EIF3F…	Human
NCB-CB	_tstat	within each collection	BP: GO biological process	GO_NEGATIVE_REGULATION_OF_CYTOSKELETON_ORGANIZATION	0.0118469	0.0481923	0.288852	1.4039	38	191	SPICE1,CHMP2A,TNKS,ZNF207,STMN1,CDK5RAP2,NEK2,TBCD,ASPM,INPP5J,CLASP1,DLG1,GAS2L2,GPSM2,ARHGEF10,SPAG5,BIRC5,MDM1,CEP192,SLIT2,PICK1,TMEM67,MAP6D1,CKAP5,EZR,AURKB,PFN2,CSNK1D,PRC1,CKAP2,SPTBN2,RACGAP1,PIBF1,FKBP4,TPX2,MYBL2,CHD4,KIFC1,MYADM,KIF23,MAP9,KATNB1,TRIM37,STMN2,NCOR1,PPP2R1A,KIF4A,TTK,SPTAN1,CEP63,KIF11,NDC80,RBM14,TRIOBP,ESPN,CCNB1,ESPL1,MAPRE1,AURKA,SPAST,STIL,DYNC1H1,SPC25,DCTN2,CCNF…	76	0.397906	ADD1,ADD2,APC,APC2,ARAP1,ARFGEF1,ARHGAP6,ARHGEF10,ARHGEF2,ASPM,AURKA,AURKB,AVIL,BBS4,BIRC2,BIRC3,BIRC5,BIRC7,BRCA1,CAPG,CAPZA1,CAPZA2,CAPZB,CCNB1,CCNF,CDC14A,CDK5RAP2,CEP120,CEP192,CEP63,CEP72,CHD3,CHD4,CHEK2,CHMP2A,CIB1,CKAP2,CKAP5,CLASP1,CLASP2,CLIP3,CORO1A,CORO1B,CSNK1D,DCTN2,DLC1,DLG1,DYNC1H1,EML1,EML2,EPS8,ESPL1,ESPN,EZR,FBXO5,FGF13,FHOD3,FKBP4,FLNA,GAS2L1,GAS2L2,GMFB,GMFG,GOLGA2,GPSM2,GSN,H…	Human
NCB-CB	_tstat	within each collection	BP: GO biological process	GO_NEGATIVE_REGULATION_OF_CELL_DIFFERENTIATION	0.00108578	0.00758402	0.26261	1.40896	3	492	NKX6-1,PCM1,NLGN1,GSK3B,SOX9,SOX11,SFRP1,VASN,ITGB1,PTCH1,WNT5A,WNT7A,DNM3,AXIN2,HOPX,CDK5RAP2,LRP4,FSTL3,ASPM,HDAC2,KIAA0319,ERBB2,NOTCH3,INPP5J,HOOK3,PRAME,SPOCK1,OSR1,CDK6,GLI2,ARHGDIA,WNT4,BMP7,FOXJ1,MIB1,SIX4,VIM,WNT3A,PSEN1,MSX1,LTF,SIX3,HOXB8,TP63,TWSG1,SLIT2,BCL2,COL5A1,EPHA7,PAX2,SRGAP2,NRARP,CDKN2A,EPHA4,TP73,IQCB1,ERBB4,TGFB2,GPR173,NTN1,HAND2,IGFBP5,ZNF675,EZH2,GDF5,INHBA,WNT9A,EREG,S…	139	0.28252	ABCA1,ABCA5,ABCG1,ACTN4,ACVRL1,ADAMTS12,ADAMTS7,ADCY6,ADIPOQ,ANKRD17,ANKRD2,ANP32B,ANXA1,AP1AR,APCS,APOE,APP,AREG,ARF6,ARHGAP4,ARHGDIA,ARHGEF1,ARHGEF2,ARNTL,ASAP1,ASCL2,ASPM,ASXL1,ATF5,AXIN1,AXIN2,B2M,BAG5,BBS12,BCL11A,BCL2,BCL6,BHLHA15,BHLHE41,BMP2,BMP4,BMP5,BMP7,BMPR1A,C1QC,C1QL4,CALR,CAPN3,CARM1,CAV1,CBFA2T2,CCDC85B,CCL3,CCND1,CCR2,CD74,CDC73,CDK5,CDK5R1,CDK5RAP2,CDK6,CDKN2A,CERS2,CETP,CFLAR,C…	Human
NCB-CB	_tstat	within each collection	BP: GO biological process	GO_RHYTHMIC_PROCESS	0.00713013	0.0328006	0.284743	1.42708	23	241	KDM5B,NLGN1,PLA2G4A,GSK3B,WNT5A,RBM4,CSNK2A1,PRKDC,DDX5,HDAC2,PAM,FANCG,ROBO2,FOXO3,EIF2B5,DHX9,KDM5A,OPRK1,RAI1,MAGEL2,NFYA,HNRNPR,SIX3,METTL3,SLIT2,CLDN4,BCL2,CSNK1E,TOP2A,SERPINE1,BTBD9,SFPQ,TGFB2,CSNK1D,CHGA,FANCF,JUN,EZH2,INHBA,EREG,SUV39H2,PTN,PPARGC1A,PSPC1,HAS2,MMP14,CRTC1,TWIST1,MAP2K6,MAGED1,BMPR1B,JUND,KCND2,PCYT1B,NCOR1,SREBF1,ADNP,HNRNPK,MYBBP1A,HNRNPU,OXTR,AHR,CBX3,TOP1,MTA1,OPRL1,C…	68	0.282158	ADAMTS1,ADCY1,ADIPOQ,ADK,ADNP,ADRB2,AFP,AHCY,AHR,AMH,ANG,ANXA1,ARNTL,ARNTL2,ARRB1,ARRB2,ATF4,ATF5,ATP7B,AXL,BAX,BCL2,BCL2L1,BHLHE40,BHLHE41,BMP4,BMPR1B,BTBD9,BTRC,CAPN5,CASP2,CBX3,CCNE1,CDK4,CDK5,CDK5R1,CEBPB,CENPI,CHGA,CLDN4,CLOCK,CLU,CPT1A,CREB1,CREBBP,CREM,CRTC1,CRY1,CRY2,CSNK1D,CSNK1E,CSNK2A1,CTNNA1,DBP,DDC,DDX5,DHX9,DMC1,DMRTA1,DRD2,DRD4,DYRK1A,EGR2,EGR3,EIF2B2,EIF2B4,EIF2B5,ENOX1,ENOX2,EP30…	Human
NCB-CB	_tstat	within each collection	BP: GO biological process	GO_GROWTH	0.00085	0.00632184	0.276741	1.44381	2	359	KDM5B,SOX9,SFRP1,SOX15,SAFB,ITGB1,WNT5A,WNT7A,TRIM28,LRP4,NDNF,FGFR3,KIF26B,ANKRD11,FMOD,GNAS,ASPM,DDX5,GDF6,FOXO3,GINS1,CDKN1C,XRN2,PTK7,GLI2,RPTOR,BMP7,RAD51B,GINS4,TBL1XR1,WNT3A,SPRY1,ABL1,SLIT2,VANGL2,BCL2,THBS3,LRP6,RMI1,LHX1,MEX3C,BRCA2,ERBB4,ACVR2B,TGFB2,IGFBP5,EZH2,GDF5,INHBA,EREG,SEMA3F,SMAD2,COMP,SPTBN2,SORBS2,SLIT1,FLRT3,BIN3,WDR48,GPD2,CTR9,ST6GAL2,DHCR7,EMP1,GLI3,BMPR1B,PRKCZ,STRA6,M…	121	0.337047	ABL1,ACTA1,ACVR2B,ADAM15,ADD1,ADM,ADRA1A,AGT,AGTR2,ALCAM,ALKBH1,AMH,ANKRD11,ANXA1,APBA1,APBA2,APOA5,APOD,APP,AR,AREG,ARID5B,ARIH2,ASPM,ATAD3A,ATF5,ATP6V0E1,ATP6V0E2,ATRX,AURKA,BCL2,BCL2L1,BCL9,BDNF,BIN3,BMP10,BMP2,BMP3,BMP4,BMP5,BMP6,BMP7,BMP8A,BMP8B,BMPR1A,BMPR1B,BNC2,BRAT1,BRCA2,CACNA1A,CAMK2D,CCL11,CCM2,CCNB1,CCNB2,CCNE1,CDC42,CDK5,CDKN1C,CFLAR,CHRNA1,CHRND,CHST11,CLIC4,CNTF,COBL,COL27A1,COMP,…	Human
NCB-CB	_tstat	within each collection	BP: GO biological process	GO_REGULATION_OF_MITOTIC_CELL_CYCLE	0.000557	0.00532009	0.27297	1.44826	1	431	KCNH5,EDN3,TPR,USP22,CENPJ,CHMP2A,TNKS,HMGA2,ZNF207,PTCH1,CENPF,NEK11,CSNK2A1,DMRT1,NEK2,PRKDC,E2F7,PLCB1,MDM4,PIN1,RNF20,CDKN1C,CDK13,ANLN,CNOT3,DLG1,ADAM17,BMP7,TOM1L2,KIF14,RAD51B,ERCC3,L3MBTL1,BIRC5,ABL1,TP63,TMEM8B,TOP2B,CNOT7,SENP2,BCL2,IGF2,CLSPN,TOP2A,CDKN2A,SMARCA4,TP73,BRCA2,CUL7,TERF1,PSMD2,BUB1,ANAPC2,EZH2,DLGAP5,WNT9A,UBE2C,EREG,PSMC5,SOX4,AATF,MAEA,PTTG1,PBX1,TPX2,INTS3,CDC25C,CDC73…	134	0.310905	AATF,ABL1,ADAM17,AFAP1L2,AIF1,AKT1,ANAPC1,ANAPC10,ANAPC11,ANAPC16,ANAPC2,ANAPC4,ANAPC5,ANAPC7,ANGEL2,ANKRD17,ANLN,ANXA1,APC,APEX1,APP,ARID3A,ASNS,ATF2,ATM,ATRX,AURKA,AURKAIP1,BAX,BCL2,BCL2L1,BECN1,BID,BIRC5,BLM,BMP4,BMP7,BORA,BRCA2,BRD4,BRD7,BTC,BTG2,BTG3,BTRC,BUB1,BUB1B,BUB3,CAMK2D,CARM1,CASP2,CAV2,CCDC8,CCNA2,CCNB1,CCNB3,CCND1,CD28,CDC123,CDC14A,CDC16,CDC20,CDC23,CDC25B,CDC25C,CDC26,CDC27,CDC42…	Human
NCB-CB	_tstat	within each collection	BP: GO biological process	GO_NEGATIVE_REGULATION_OF_ORGANELLE_ORGANIZATION	0.00114712	0.00799521	0.27917	1.44863	3	341	TPR,SPICE1,CHMP2A,TNKS,ZNF207,STMN1,TBC1D30,CDK5RAP2,CENPF,CSNK2A1,DMRT1,NEK2,ZNF451,TBCD,ASPM,SUPT6H,INPP5J,EVI5L,CLASP1,DLG1,GAS2L2,LIG3,GPSM2,KDM5A,ARHGEF10,SPAG5,BMP7,TOM1L2,RTEL1,ATG5,BIRC5,MDM1,TET1,CEP192,SLIT2,PICK1,TMEM67,KDM1A,JARID2,PARL,MAP6D1,KDM3A,CKAP5,EZR,AURKB,PFN2,TERF1,CSNK1D,FLCN,PRC1,BUB1,CKAP2,SCFD1,SPTBN2,RACGAP1,UBQLN4,PIBF1,NOC2L,PTTG1,PPARGC1A,FKBP4,TPX2,MYBL2,HSPA1A,CHD…	130	0.381232	ACAA2,ACD,ADD1,ADD2,AKT1,ANKRD27,APC,APC2,ARAP1,ARFGEF1,ARHGAP6,ARHGEF10,ARHGEF2,ARRB2,ASF1A,ASPM,ATAD2,ATAD2B,ATG5,ATM,ATRX,AURKA,AURKAIP1,AURKB,AVIL,BAG4,BBS4,BCL2L1,BCOR,BIRC2,BIRC3,BIRC5,BIRC7,BMP4,BMP7,BNIP3,BRCA1,BUB1,BUB1B,BUB3,CAPG,CAPZA1,CAPZA2,CAPZB,CCNB1,CCNF,CDC14A,CDK5RAP2,CENPF,CEP120,CEP192,CEP63,CEP72,CHD3,CHD4,CHEK1,CHEK2,CHMP2A,CHMP4A,CHMP4B,CIB1,CKAP2,CKAP5,CLASP1,CLASP2,CLIP3,…	Human
NCB-CB	_tstat	within each collection	BP: GO biological process	GO_NEGATIVE_REGULATION_OF_NEURON_DIFFERENTIATION	0.00929656	0.0401403	0.304828	1.45464	29	168	NLGN1,GSK3B,SOX9,ITGB1,WNT5A,DNM3,CDK5RAP2,LRP4,ASPM,HDAC2,KIAA0319,NOTCH3,INPP5J,SPOCK1,ARHGDIA,BMP7,MIB1,VIM,WNT3A,PSEN1,SIX3,SLIT2,EPHA7,EPHA4,TP73,NTN1,SEMA3F,SEMA4C,FKBP4,PBX1,GLI3,STMN2,NOTCH1,SEMA6A,CBFA2T2,SOX2,ULK2,HES1,DLL1,MEIS1,DAB1,ISL2,LRP1,CNTN4,LINGO1,NFATC4,BCL11A,CRMP1,ZNF536,SEMA3A	50	0.297619	ADCY6,APOE,APP,ARF6,ARHGAP4,ARHGDIA,ARHGEF1,ASAP1,ASPM,B2M,BAG5,BCL11A,BMP7,CALR,CARM1,CAV1,CBFA2T2,CCR2,CDK5,CDK5R1,CDK5RAP2,CERS2,CIB1,CNTF,CNTN2,CNTN4,CRMP1,CTDSP1,DAB1,DCC,DDX6,DGUOK,DIXDC1,DLL1,DNM3,DPYSL3,DTX1,EDNRB,EFEMP1,EFNA1,EIF2AK4,EIF4E,EIF4ENIF1,EPHA4,EPHA7,EPHB2,FGF13,FKBP4,FSTL4,GAK,GDF11,GDI1,GFAP,GFI1,GLI3,GORASP1,GPR37L1,GSK3B,HDAC2,HES1,HMG20A,HOXA2,ID1,ID2,ID4,IFRD1,IL1B,INPP5…	Human
NCB-CB	_tstat	within each collection	BP: GO biological process	GO_NEGATIVE_REGULATION_OF_WNT_SIGNALING_PATHWAY	0.00770179	0.034642	0.303243	1.45813	24	178	NKD1,IFT80,DKK3,GSK3B,SOX9,SFRP1,WNT5A,AXIN2,LRP4,DKK2,WIF1,DVL3,NKD2,FOXO3,ZNRF3,APCDD1,FGF9,WNT4,KLHL12,LEF1,CHD8,SIX3,DVL2,TSC2,LRP6,CSNK1E,ROR2,PSMD2,PSMC5,SOSTDC1,MDFI,PPP2R3A,TAX1BP3,PSMD14,GLI3,NPHP4,NXN,SOX17,MESP1,NOTCH1,SOX2,CTHRC1,PSMF1,LRP1,CCND1,PSMC1,MLLT3,NFATC4,IGFBP2,PSMD6	50	0.280899	ANKRD6,APC,APC2,APCDD1,APOE,AXIN1,AXIN2,BARX1,BICC1,BMP2,CAV1,CBY1,CCND1,CDH2,CHD8,CSNK1A1,CSNK1E,CTHRC1,CTNNBIP1,CTNND1,CUL3,CXXC4,CYLD,DAB2,DAB2IP,DACT1,DACT3,DDIT3,DKK2,DKK3,DVL1,DVL2,DVL3,EGR1,FGF9,FOXO1,FOXO3,FRZB,FUZ,FZD1,FZD6,G3BP1,GLI1,GLI3,GPC3,GRB10,GREM1,GSC,GSK3A,GSK3B,HDAC1,HECW1,HIC1,HMGXB4,IFT80,IGFBP1,IGFBP2,IGFBP4,IGFBP6,INVS,KLHL12,KREMEN2,LATS1,LATS2,LEF1,LIMD1,LRP1,LRP4,LRP6,L…	Human
NCB-CB	_tstat	within each collection	BP: GO biological process	GO_REGULATION_OF_CANONICAL_WNT_SIGNALING_PATHWAY	0.00455235	0.0227547	0.295206	1.45846	14	218	NKD1,RNF146,DKK3,GSK3B,SOX9,SFRP1,TNKS,WNT5A,WNT7A,AXIN2,LRP4,DKK2,ASPM,PIN1,DVL3,NKD2,WLS,FOXO3,ZNRF3,FGF9,WNT4,KLHL12,LEF1,CHD8,LGR5,WNT3A,DVL2,LRP6,CSNK1E,ZNF703,NRARP,JUP,SMURF2,ROR2,CSNK1D,PSMD2,COL1A1,PSMC5,SOX4,SOSTDC1,PPP2R3A,PSMD14,IFT20,GLI3,NPHP4,CTDNEP1,DLX5,SOX17,MESP1,LGR6,NOTCH1,DAPK3,RNF220,SOX2,CTHRC1	55	0.252294	ANKRD10,ANKRD6,APC,APC2,APOE,ARNTL,ASPM,AXIN1,AXIN2,BAMBI,BICC1,BMP2,BTRC,CAPRIN2,CAV1,CCNY,CDH2,CDK14,CHD8,COL1A1,CSNK1A1,CSNK1D,CSNK1E,CTDNEP1,CTHRC1,CTNND1,CTNND2,CUL3,CYLD,DAB2,DAB2IP,DACT1,DACT3,DAPK3,DDIT3,DIXDC1,DKK2,DKK3,DLX5,DVL1,DVL2,DVL3,EDA,EGR1,EMD,FGF10,FGF9,FGFR2,FOLR1,FOXO1,FOXO3,FRZB,FUZ,FZD1,FZD5,FZD6,G3BP1,GLI1,GLI3,GPC3,GPRC5B,GREM1,GSK3A,GSK3B,HDAC1,HECW1,IFT20,IGFBP1,IGFBP2,…	Human
NCB-CB	_tstat	within each collection	BP: GO biological process	GO_WNT_SIGNALING_PATHWAY	0.00174774	0.0110611	0.286707	1.47414	5	312	NKD1,CDH3,ARL6,RNF146,FZD2,DKK3,GSK3B,SFRP1,TNKS,WNT5A,WNT7A,AXIN2,ARHGEF19,LRP4,DKK2,CSNK2A1,MARK1,PLCB1,WIF1,CD24,DVL3,NKD2,CELSR3,WLS,AP2B1,ZNRF3,APCDD1,PTK7,WNT4,KLHL12,TNRC6C,LEF1,DAAM1,CHD8,TBL1XR1,TCF7L1,WNT3A,PSEN1,FZD10,VANGL2,DVL2,NR4A2,SENP2,LRP6,CSNK1E,SMURF2,ROR2,CSNK1D,PSMD2,HOXB9,WNT9A,LDB1,PSMC5,CLTC,SOX4,SOSTDC1,CTR9,PPP2R3A,TAX1BP3,CDC73,SPIN1,PSMD14,NXN,SOX17,RYK,MAP3K7,LGR6,PI…	78	0.25	AMOTL1,AMOTL2,AP2A1,AP2A2,AP2B1,AP2M1,AP2S1,APC,APC2,APCDD1,ARHGEF19,ARL6,ARRB2,AXIN1,AXIN2,BCL7B,BCL9,BCL9L,BRD7,BTRC,CALCOCO1,CALM1,CALM2,CALM3,CAMK2A,CAV1,CCDC88C,CCND1,CCNE1,CCNY,CD24,CDC42,CDC73,CDH3,CDK14,CELSR1,CELSR2,CELSR3,CHD8,CLTC,CPE,CPZ,CSNK1A1,CSNK1D,CSNK1E,CSNK1G1,CSNK1G2,CSNK1G3,CSNK2A1,CSNK2A2,CSNK2B,CTHRC1,CTNNB1,CTNNBIP1,CTNND1,CTNND2,CTR9,CUL1,CUL3,CXXC4,CYLD,DAAM1,DAB2,DACT1,…	Human
NCB-CB	_tstat	within each collection	BP: GO biological process	GO_RESPONSE_TO_GROWTH_FACTOR	0.000557	0.00532009	0.278316	1.47472	1	425	ZNF8,KDM5B,UBE2M,TPR,MAPK7,FRS2,GSK3B,SOX9,SFRP1,FNTA,FSTL1,TGIF1,FGF12,ITGB1,PTPRK,WNT5A,WNT7A,KIDINS220,LRP4,FGFR3,FMOD,GTF2F1,SOX5,NEDD8,GDF6,HDAC2,POLR2D,ERBB2,POLR2H,FGF19,BPTF,F11R,FGFRL1,COL2A1,FGF9,WNT4,BMP7,LEF1,FUT8,MSX1,PLCG1,TWSG1,NCBP2,COL4A2,FGFBP1,HNRNPM,LHX1,PAX2,GALNT3,SMURF2,TMEM100,ACVR2B,NCBP1,TGFB2,ROR2,CSNK1D,RUNX3,JUN,GDF5,TRIM71,COL1A1,RGMB,SMAD2,FLRT3,PTN,PPARGC1A,ACVR2A,…	140	0.329412	ACAP2,ACVR1,ACVR2A,ACVR2B,ACVRL1,ADAM9,ADAMTS12,ADAMTS7,AKT1,AKT1S1,ANGPT2,ANXA3,APAF1,APC,APOA1,APP,ARG1,ARHGEF18,ARRB2,BAG4,BAMBI,BCAR1,BECN1,BGLAP,BMP1,BMP10,BMP2,BMP3,BMP4,BMP5,BMP6,BMP7,BMP8A,BMP8B,BMPR1A,BMPR1B,BMPR2,BPTF,BYSL,CAD,CASP3,CAT,CAV1,CBL,CCL2,CCL5,CCNA2,CD44,CDC34,CDC5L,CDH5,CEP57,CGN,CHRD,CHRDL1,CIB1,CLDN5,CLEC3B,CLU,COL1A1,COL1A2,COL2A1,COL3A1,COL4A2,CORO1A,CORO1B,CPNE3,CPS1,C…	Human
NCB-CB	_tstat	within each collection	BP: GO biological process	GO_RIBONUCLEOPROTEIN_COMPLEX_SUBUNIT_ORGANIZATION	0.00644765	0.0302473	0.306341	1.47537	20	180	TGS1,SFSWAP,SNRNP200,PTBP2,SHQ1,POLR2D,CDC40,PRPF3,RPF2,SF3B1,RPL38,LUC7L,CRNKL1,SART3,CNOT7,CELF4,SNRPB,EIF3F,RPS5,RPS27,SNRPD1,SNRPE,KLC1,ERAL1,XAB2,CELF1,RPL23A,LUC7L3,ISY1,SRSF5,SF3A3,EIF3G,NSUN4,PIH1D1,EIF3M,TDRD5,RPL11,SRPK2,ATXN2,RPL6,KIF5B,PRPF31,EIF3CL,RBMXL1,DDX1,BMS1,EIF3C,SF3A1,PRPF18,SMN2,PRMT5,NUFIP1,RPL24,DYNC1H1,LSM3,EIF3L,PRPF39,SETX,STRAP,RPF1,SRSF10,PLD6,SRSF1,SRSF6,RC3H1,PRPF6…	69	0.383333	ABT1,ADAR,ATXN2,ATXN2L,BICD1,BMS1,BRIX1,C1QBP,CD2BP2,CDC123,CDC40,CELF1,CELF4,CIRBP,CLNS1A,CLP1,CNOT7,CRNKL1,DDX1,DDX20,DDX23,DDX28,DDX39B,DDX3X,DDX6,DENR,DHX30,DICER1,DYNC1H1,EDC3,EIF2A,EIF2D,EIF2S3,EIF3A,EIF3B,EIF3C,EIF3CL,EIF3D,EIF3E,EIF3F,EIF3G,EIF3H,EIF3I,EIF3J,EIF3K,EIF3L,EIF3M,EIF4B,EIF4H,EIF6,ERAL1,FASTKD2,GEMIN2,GEMIN4,GEMIN5,GEMIN6,GEMIN7,GEMIN8,GFM2,GRB7,HBS1L,ISY1,KIF5B,KLC1,LIMD1,LSM…	Human
NCB-CB	_tstat	within each collection	BP: GO biological process	GO_ESTABLISHMENT_OR_MAINTENANCE_OF_CELL_POLARITY	0.0101846	0.0427198	0.320008	1.47694	31	132	LLGL1,GSK3B,FBF1,WNT5A,WNT7A,CDK5RAP2,KIF26B,CLASP1,CYP26B1,PTK7,BRSK1,DLG1,GPSM2,SPAG5,FOXJ1,SPRY1,FSCN1,VANGL2,EYA1,UST,CKAP5,KIF2C,EZR,CRB1,PRKCZ,RPGRIP1L,DLG3,LLGL2,NEK3,HES1,CYTH3,CENPA,NDC80,MARK2,DLG5,FERMT1,NDEL1,CLASP2,ARHGEF11,BRSK2,JAM3,DYNLT1,NUMA1,PRKCI,CLIC4,NDE1,CTNNA1,MPP5,SIPA1L3,WEE1,DLG4,WNT11,GBF1,CRB2,PKD1,PARD3	56	0.424242	ACTR2,ACTR3,AMOT,AMOTL1,ANK1,APC,AQP1,ARF4,ARF6,ARHGEF11,ARHGEF2,BRSK1,BRSK2,CAP1,CAP2,CCL19,CCL21,CCL4,CCR7,CD3G,CDC42,CDC42BPB,CDK5RAP2,CENPA,CKAP5,CLASP1,CLASP2,CLIC4,CRB1,CRB2,CTNNA1,CYP26B1,CYTH3,DLG1,DLG2,DLG3,DLG4,DLG5,DOCK2,DOCK7,DST,DYNLT1,EPHB1,EYA1,EZR,FAT1,FBF1,FERMT1,FGF10,FGF13,FOXF1,FOXJ1,FRMD4A,FRMD4B,FSCN1,GBF1,GOLPH3,GPSM2,GSK3B,HES1,HTT,ILK,JAM3,KIF26B,KIF2C,LHX2,LIN7A,LIN7B,LI…	Human
NCB-CB	_tstat	within each collection	BP: GO biological process	GO_DNA_INTEGRITY_CHECKPOINT	0.0105196	0.0438973	0.321537	1.48202	32	131	CENPJ,HMGA2,NEK11,PRKDC,TAOK1,E2F7,MDM4,TIPRL,BRSK1,CNOT3,DTL,TP63,ATR,TOP2B,CNOT7,CLSPN,TOP2A,BRIP1,TP73,SOX4,CDC25C,TFDP2,PLK1,GTSE1,XPC,WAC,CDC6,PRMT1,TNKS1BP1,ATRIP,CEP63,MUC1,CCNA2,E2F1,BLM,RBBP8,INTS7,CCND1,CCNB1,MDM2,BTG2,AURKA,CNOT2,CDK1,ZNF830	45	0.343511	ARID3A,ATF2,ATM,ATR,ATRIP,AURKA,BABAM1,BAX,BLM,BRCA1,BRCC3,BRIP1,BRSK1,BTG2,CARM1,CASP2,CCNA2,CCNB1,CCND1,CDC14B,CDC25C,CDC45,CDC5L,CDC6,CDK1,CDK2,CDK5RAP3,CDKN1A,CDKN1B,CDT1,CENPJ,CEP63,CHEK1,CHEK2,CLOCK,CLSPN,CNOT1,CNOT10,CNOT2,CNOT3,CNOT4,CNOT6,CNOT6L,CNOT7,CNOT8,CRADD,DGKZ,DNA2,DTL,E2F1,E2F4,E2F7,EP300,FANCI,FBXO31,FBXO6,FOXN3,FOXO4,FZR1,GADD45A,GIGYF2,GTSE1,H2AFX,HINFP,HMGA2,HUS1,INTS7,MAPK1…	Human
NCB-CB	_tstat	within each collection	BP: GO biological process	GO_POSITIVE_REGULATION_OF_WNT_SIGNALING_PATHWAY	0.00854701	0.0377094	0.319973	1.49726	26	145	NKD1,RNF146,SFRP1,TNKS,WNT5A,WNT7A,AXIN2,DKK2,CSNK2A1,ASPM,PIN1,WLS,FGF9,WNT4,LGR5,WNT3A,ABL1,DVL2,LRP6,CSNK1E,NRARP,JUP,SMARCA4,SMURF2,ROR2,CSNK1D,PSMD2,COL1A1,PSMC5,SOX4,PPP2R3A,CDC73,SPIN1,PSMD14,CTDNEP1,DLX5,LGR6,DAPK3,RNF220,SKI	40	0.275862	ABL1,ANKRD6,ARNTL,ASPM,ATP6AP2,ATP6V0C,ATP6V1C2,AXIN1,AXIN2,BAMBI,BMP2,CAPRIN2,CAV1,CDC73,COL1A1,CSNK1D,CSNK1E,CSNK2A1,CTDNEP1,DAB2,DACT1,DAPK3,DEPDC1B,DISC1,DIXDC1,DKK2,DLX5,DVL1,DVL2,EDA,FGF10,FGF9,FGFR2,GPC3,GPRC5B,HHEX,ILK,JUP,KANK1,LGR4,LGR5,LGR6,LRP6,LRRK1,LRRK2,MACF1,MBD2,MLLT3,NFKB1,NKD1,NLE1,NRARP,PIN1,PPM1A,PPP2R3A,PSMA1,PSMA2,PSMA3,PSMA4,PSMA5,PSMA6,PSMA7,PSMB1,PSMB10,PSMB2,PSMB3,PSMB4…	Human
NCB-CB	_tstat	within each collection	BP: GO biological process	GO_NEGATIVE_REGULATION_OF_CELL_CYCLE	0.000564	0.00532009	0.286518	1.50537	1	388	TPR,SOX11,CENPJ,CHMP2A,TNKS,HMGA2,ZNF207,PTPRK,TSG101,CDK5RAP2,IRF6,CENPF,NEK11,CSNK2A1,DMRT1,PRKDC,E2F7,EIF4G2,MLF1,MDM4,CDKN1C,TSC1,CNOT3,TP53BP2,DLG1,CDK6,GAS2L2,RPTOR,PTGS2,BMP7,TOM1L2,C2orf40,CCNK,ABL1,TP63,MDM1,TMEM67,TOP2B,SUSD2,CNOT7,TSC2,E2F8,BARD1,BCL2,WDR6,STRADA,CLSPN,TOP2A,APBB2,CDKN2A,SMARCA4,AURKB,TP73,TGFB2,TERF1,PPP1R15A,BUB1,RUNX3,EZH2,KHDRBS1,INHBA,WNT9A,UBE2C,SOX4,PTTG1,GAS2L3…	118	0.304124	ABL1,AK1,ALOX15B,ANAPC10,ANGEL2,APBB1,APBB2,APC,ARID3A,ATF2,ATF5,ATM,ATRX,AURKA,AURKAIP1,AURKB,BARD1,BAX,BCL2,BCL2L1,BLM,BMP2,BMP4,BMP7,BRCA1,BRD4,BRD7,BTG2,BTG3,BUB1,BUB1B,BUB3,C10orf99,C2orf40,CAB39,CAB39L,CALR,CARM1,CASP2,CASP3,CAST,CCNA2,CCNB1,CCND1,CCNF,CCNK,CDC123,CDC14A,CDC25C,CDC5L,CDC73,CDK1,CDK2,CDK4,CDK5,CDK5RAP1,CDK5RAP2,CDK5RAP3,CDK6,CDK7,CDK9,CDKN1A,CDKN1B,CDKN1C,CDKN2A,CDKN2B,CDKN2…	Human
NCB-CB	_tstat	within each collection	BP: GO biological process	GO_COLUMNAR_CUBOIDAL_EPITHELIAL_CELL_DIFFERENTIATION	0.011011	0.0454784	0.34787	1.50873	32	91	AGR2,NKX6-1,EDN3,SOX11,WNT5A,DLX3,RFX3,B9D1,TYRP1,CDK6,WNT4,LEF1,TP63,BCL2,USP13,SOX4,GLI3,KLF5,WDPCP,FGFR1,OCA2,NOTCH1,HES1,SMO,DLL1	25	0.274725	AGR2,ATP2B2,B9D1,BCCIP,BCL2,BMP2,BMP4,BMP5,BMP6,C1GALT1,CDH2,CDK6,CDKN1A,CLIC5,DLL1,DLX3,EDN3,EDNRB,FAM20C,FGFR1,FGFR2,FOXA1,GATA4,GATA5,GATA6,GLI3,HES1,HIF1A,HOXA5,HPS4,HPS6,IL31RA,JAG1,JAG2,KIT,KLF5,LEF1,LRTOMT,MCOLN3,MEF2C,MEN1,MITF,MREG,MYO5A,MYO7A,NKX3-2,NKX6-1,NOTCH1,OCA2,PAFAH1B1,PAX6,PDPK1,PDZD7,PLS3,PRDM1,PROX1,PTK6,RAB27A,RAC1,RARA,RARB,RARG,RBPJ,RFX3,ROS1,RXRA,SAV1,SCRIB,SEC24B,SIDT2,S…	Human
NCB-CB	_tstat	within each collection	BP: GO biological process	GO_POSITIVE_REGULATION_OF_CHROMOSOME_ORGANIZATION	0.0070355	0.0324576	0.32753	1.51179	21	134	DHX36,TPR,CCT2,TNKS,TRIM28,NEK2,SNW1,RNF20,TADA2A,RPS6KA5,CCT6A,RTEL1,TET1,ATR,SART3,KDM1A,JARID2,AUTS2,AURKB,SLX4,SFPQ,DLGAP5,UBE2N,PPARGC1A,CTR9,MAPK15,AKAP8L,DNMT1,RUVBL2,PLK1,ZNF304,WBP2,C6orf89,SREBF1,RB1,SETDB1,PIH1D1,WRAP53,MUC1,CCNB1,ESPL1,PHF19,CHTOP,SMAD4,HNRNPA1,GNL3,VEGFA,PNKP,CTBP1,MAPKAPK5,GOLGA2,LIF,SMC5,FBXO5	54	0.402985	ACD,AKAP8,AKAP8L,ANAPC10,ANAPC11,ARRB1,ATM,ATR,ATRX,AURKB,AUTS2,BCL6,BECN1,BRCA1,BRD7,C6orf89,CCNB1,CCT2,CCT3,CCT4,CCT5,CCT6A,CCT7,CCT8,CDK9,CHTOP,CTBP1,CTNNB1,CTR9,CUL3,DAXX,DHX36,DKC1,DLGAP5,DNMT1,DNMT3B,EED,EP300,ERCC1,ESPL1,FBXO5,FOXP3,GATA3,GNL3,GOLGA2,GORASP1,H2AFY,HMBOX1,HNRNPA1,IL1B,JARID2,JDP2,KAT2A,KAT2B,KDM1A,LIF,LIG4,MAP2K7,MAP3K4,MAPK1,MAPK15,MAPK3,MAPKAPK5,MIER1,MTF2,MUC1,MYB,NAP1L2…	Human
NCB-CB	_tstat	within each collection	BP: GO biological process	GO_REGULATION_OF_CELLULAR_RESPONSE_TO_GROWTH_FACTOR_STIMULUS	0.00182815	0.0113045	0.310521	1.51373	5	197	FBN2,LEMD3,DKK3,SOX11,SFRP1,VASN,WNT5A,LTBP1,UBE2O,ZNF451,FSTL3,FBN3,SNW1,PIN1,NPNT,CDKN1C,FGF9,ADAM17,ZNF423,WNT4,MECOM,MSX1,SPRY1,ABL1,TWSG1,CASK,SLIT2,ADAMTS3,FGFBP1,ZNF703,SMURF2,GPC1,GLG1,FLCN,GDF5,SMAD2,SOSTDC1,ACVR2A,FGF18,FGFR1,ADAMTS12,STUB1,NOTCH1,THBS1,SKI,SKIL,HES1,DLL1	48	0.243655	ABL1,ACVR2A,ACVRL1,ADAM17,ADAMTS12,ADAMTS3,ADAMTSL2,AGT,AGTR2,ARNT,ASPN,BAMBI,BCL9,BCL9L,BMP4,BMPER,BMPR2,CASK,CAV1,CAV2,CCBE1,CD109,CD63,CDKN1C,CDKN2B,CHRD,CHRDL1,CHST11,CITED2,CRB2,CTDSPL2,CTNNB1,CXCL13,DAB2,DAB2IP,DCN,DKK3,DLL1,DMD,DNM2,DOK5,DSTYK,DUSP6,EID2,ENG,FAM20C,FAM89B,FBN1,FBN2,FBN3,FBXL15,FGF1,FGF10,FGF18,FGF2,FGF9,FGFBP1,FGFBP3,FGFR1,FGFR2,FKBP8,FLCN,FLT1,FOLR1,FOXD1,FSTL3,FURIN,FUZ,…	Human
NCB-CB	_tstat	within each collection	BP: GO biological process	GO_MAMMARY_GLAND_DEVELOPMENT	0.00994036	0.0421325	0.339708	1.51417	29	107	KDM5B,SOX9,PTCH1,WNT5A,IRF6,PAM,GLI2,WNT4,LEF1,WNT3A,MSX1,ZNF703,BRCA2,ERBB4,NTN1,IGFBP5,HOXB9,SOSTDC1,NRG3,ITGA2,GLI3,NCOR1,FASN,ETV4,AREG,SMO,OXTR,CCND1,ELF3,HK2,ARG1,ATP7A,PYGO2,ATP7B,HIF1A,MED1,NME1,VEGFA,EPHA2,VDR,ARHGAP5,LRP5,FGFR2,CAD,PRLR,IRS2,TPH1,FOXB1,CREB1,BTRC	50	0.46729	AKT1,AKT2,APLN,APRT,AREG,ARG1,ARHGAP5,ATP2B2,ATP7A,ATP7B,B4GALT1,BCL2L11,BMP4,BRCA2,BTRC,CAD,CAPN1,CAV1,CCL11,CCND1,CDO1,CEBPB,CREB1,CSF1,CSF1R,DDR1,DHODH,EGF,ELF3,EPHA2,ERBB4,ESR1,ETV4,FASN,FGF10,FGFR2,FOXB1,FOXF1,GC,GLI2,GLI3,HIF1A,HK2,HOXA5,HOXA9,HOXB9,HOXD9,ID2,IGFBP5,IRF6,IRS2,ITGA2,JAK2,KDM5B,LEF1,LRP5,MAPK1,MED1,MGMT,MSX1,MSX2,NCOA1,NCOR1,NME1,NOTCH4,NRG1,NRG3,NTN1,ORAI1,OXTR,PAM,PHB2,PML,…	Human
NCB-CB	_tstat	within each collection	BP: GO biological process	GO_NUCLEUS_ORGANIZATION	0.00754098	0.0341122	0.33491	1.51507	22	118	TPR,CHMP2A,NUP107,SUN1,TOR1AIP2,POLR1B,KDM3A,CHD5,TBPL1,RAE1,NUP160,TMEM43,REEP4,NUP214,AKAP8L,PLK1,CTDNEP1,NSFL1C,NUP188,TMF1,CHMP1B,PPP2R1A,NUP35,SEH1L,CCNB2,SRPK2,NOLC1,WBP2NL,NUP85,CHMP1A,ANKLE2,HMGB2,CCNB1,SPAST,CDK1,PARP11,LPIN1,VRK1,PYGO2,NDEL1,LEMD2,TOR1A,NUMA1,TARDBP,RRN3	45	0.381356	AAAS,AGFG1,AHCTF1,AKAP8L,ANKLE2,ATXN7,BANF1,BIN1,CCNB1,CCNB2,CDK1,CEP55,CHD5,CHMP1A,CHMP1B,CHMP2A,CHMP2B,CHMP3,CHMP4A,CHMP4B,CHMP4C,CHMP5,CHMP6,CHMP7,CTDNEP1,DAXX,DMPK,EMD,ETS1,GOLM1,HIPK2,HMGB2,KDM3A,LEMD2,LMNA,LPIN1,NDEL1,NEK6,NEK9,NOLC1,NSFL1C,NUMA1,NUP107,NUP133,NUP153,NUP155,NUP160,NUP188,NUP205,NUP210,NUP214,NUP35,NUP37,NUP43,NUP50,NUP54,NUP62,NUP85,NUP88,NUP93,NUP98,NUPL2,OSBPL8,PAFAH1B1,P…	Human
NCB-CB	_tstat	within each collection	BP: GO biological process	GO_MEIOTIC_CELL_CYCLE_PROCESS	0.00956149	0.0408479	0.342792	1.5219	28	104	REC8,TOP3A,ASPM,SMC4,SUN1,CYP26B1,RAD51B,KIF18A,TOP2B,TOP2A,BRCA2,TERF1,NCAPD2,TEX15,CCNA1,EREG,SPIRE2,PTTG1,SMC1B,FANCM,SMC2,PLK1,MKI67,KLHDC3,RAD54L,PPP2R1A,XRCC2,CKS2,PRKAR1A,FANCA,RAD51C,ESPL1,AURKA,SPDYA,SYCP2,CDC25B,FANCD2,MLH3,TUBG1,PLD6,TRIP13,MSH6,GOLGA2,XRCC3,SYCE2,FBXO5,HUS1,LFNG,CCDC155,TUBGCP2,TDRKH,MSH2,MSH5,BAG6	54	0.519231	ACTR2,ACTR3,ADCY3,ASPM,ATM,AURKA,BAG6,BCL2L11,BRCA2,C11orf80,CCDC155,CCNA1,CCNB1IP1,CDC25B,CDK2,CKS2,CYP26B1,DMC1,DPEP3,DUSP13,ERCC4,EREG,ESPL1,FANCA,FANCD2,FANCM,FBXO5,GOLGA2,HFM1,HORMAD1,HSF1,HSPA2,HUS1,ING2,KIF18A,KLHDC3,LFNG,MASTL,MEI1,MKI67,MLH1,MLH3,MOV10L1,MSH2,MSH3,MSH4,MSH5,MSH6,MYH9,NCAPD2,NCAPD3,NSUN2,PIM2,PLD6,PLK1,PPP2R1A,PRKAR1A,PSMD13,PTTG1,RAD1,RAD21,RAD50,RAD51,RAD51B,RAD51C,RAD5…	Human
NCB-CB	_tstat	within each collection	BP: GO biological process	GO_REGULATION_OF_SIGNAL_TRANSDUCTION_BY_P53_CLASS_MEDIATOR	0.0075448	0.0341122	0.323725	1.52265	23	151	EHMT1,CSNK2A1,TOP3A,MDM4,DDX5,HDAC2,PIN1,TAF10,TP53BP2,EXO1,L3MBTL1,MSX1,TP63,SUPT16H,ATR,KDM1A,SENP2,BARD1,CHD5,RMI1,RFC3,KAT6A,BRIP1,CDKN2A,AURKB,TP73,TTC5,BDKRB2,RFC4,NOC2L,TPX2,CHD4,TWIST1,MEAF6,PMAIP1,HNRNPK,ATRIP,MUC1,BLM,BANP,PRKAG1,RBBP8,SNAI1,TOPBP1,TP53RK,DYRK2,MDM2,AURKA,PPP1R13L,PRMT5,RMI2	51	0.337748	AKT1,ANKRD2,ATM,ATR,ATRIP,AURKA,AURKB,BANP,BARD1,BCL2L12,BDKRB2,BLM,BRCA1,BRD7,BRIP1,BRPF1,CD44,CD74,CDK2,CDK5,CDK5R1,CDK5RAP3,CDKN2A,CHD3,CHD4,CHD5,CHEK1,CHEK2,CSNK2A1,CSNK2A2,CSNK2B,DDX5,DNA2,DYRK1A,DYRK2,EEF1E1,EHMT1,EHMT2,ELL3,EP300,EXO1,HDAC1,HDAC2,HEXIM1,HIC1,HIPK1,HIPK2,HNRNPK,HUS1,ING2,ING5,JMY,KAT5,KAT6A,KDM1A,L3MBTL1,MAPK11,MAPK14,MAPKAPK5,MBD3,MDM2,MDM4,MEAF6,MIF,MSX1,MTA2,MUC1,NBN,NOC…	Human
NCB-CB	_tstat	within each collection	BP: GO biological process	GO_REGULATION_OF_EPITHELIAL_CELL_DIFFERENTIATION	0.00921963	0.0398613	0.343562	1.52509	27	103	NKX6-1,GSK3B,SOX9,PTCH1,PROM1,RFX3,TRIM16,CD24,OSR1,APOLD1,FOXJ1,TP63,BCL2,LHX1,PAX2,TMEM100,EZH2,IKBKB,MYCN,PAX8,MESP1,NOTCH1,HES1,SMO,DLL1,AHI1,FAT4,CCND1,YAP1,MED1,OVOL2,S1PR3,H2AFY2,S1PR2,MAFG,SRSF6,VDR,LIF,ROCK1,PPP1R12A	40	0.38835	ACVRL1,ADAMTS20,ADAMTS9,ADIPOQ,AHI1,ALOX15B,APOLD1,AQP3,ARNTL,ATOH8,BAD,BCL2,BMP4,BMP6,BTG1,CAV1,CCND1,CD109,CD24,CDH5,CLDN5,CLOCK,CTNNB1,CYP27B1,DLL1,ERRFI1,EZH2,FAT4,FOXJ1,FRZB,GATA3,GDF2,GDNF,GNA11,GNAQ,GRHL2,GSK3A,GSK3B,H2AFY,H2AFY2,HES1,HEY2,HOXA7,ID1,IFNG,IKBKB,IL1B,KEAP1,KIAA1109,KITLG,LHX1,LIF,MAFF,MAFG,MED1,MESP1,MSX2,MYCN,NCOA3,NKX6-1,NME2,NOTCH1,NOTCH4,NUMB,OSR1,OVOL2,PAX2,PAX6,PAX8,PP…	Human
NCB-CB	_tstat	within each collection	BP: GO biological process	GO_MITOTIC_DNA_INTEGRITY_CHECKPOINT	0.00832224	0.0369192	0.350785	1.52519	24	92	CENPJ,HMGA2,NEK11,PRKDC,E2F7,MDM4,CNOT3,TP63,TOP2B,CNOT7,CLSPN,TOP2A,TP73,SOX4,CDC25C,TFDP2,GTSE1,XPC,PRMT1,TNKS1BP1,MUC1,CCNA2,E2F1,BLM,CCND1,CCNB1,MDM2,BTG2,AURKA,CNOT2,CDK1,ZNF830,FANCI,PCNA,PLK3,PLK2,RAD9B,RFWD3,RPA2,CDK5RAP3,HUS1,SETMAR	42	0.456522	ARID3A,ATF2,ATM,AURKA,BAX,BLM,BTG2,CARM1,CASP2,CCNA2,CCNB1,CCND1,CDC25C,CDK1,CDK2,CDK5RAP3,CDKN1A,CDKN1B,CENPJ,CHEK2,CLSPN,CNOT1,CNOT10,CNOT2,CNOT3,CNOT4,CNOT6,CNOT6L,CNOT7,CNOT8,CRADD,DGKZ,E2F1,E2F4,E2F7,EP300,FANCI,FBXO31,FOXN3,FOXO4,GADD45A,GIGYF2,GTSE1,HMGA2,HUS1,MDC1,MDM2,MDM4,MSH2,MUC1,NAE1,NBN,NEK11,NPM1,PCBP4,PCNA,PLAGL1,PLK2,PLK3,PML,PPP2R5C,PRKDC,PRMT1,RAD9A,RAD9B,RBL2,RBM38,RFWD3,RPA2,…	Human
NCB-CB	_tstat	within each collection	BP: GO biological process	GO_PROTEIN_ACYLATION	0.00543478	0.026233	0.330218	1.52665	16	137	USP22,SUPT3H,PCGF2,CPA4,SAP130,ACTL6A,EP400,TRIM16,NAT9,NAA16,YEATS2,TAF10,TADA2A,LEF1,YEATS4,NAA11,MAP6D1,CHD5,KAT6A,WDR75,BRCA2,MED24,RUVBL1,KAT7,GTF3C4,LDB1,ESCO1,DMAP1,GOLGA7,RUVBL2,MEAF6,MAP3K7,HCFC1,ING4,MSL1,MCRS1,MSL2,ATAT1,EPC1,ZDHHC15,CRTC2	41	0.29927	ACTL6A,APBB1,ASL,ATAT1,ATF2,BAG6,BEND3,BLOC1S1,BRCA2,BRD1,BRD8,BRPF1,BRPF3,CDYL,CHD5,CLIP3,CLOCK,CPA4,CREBBP,CRTC2,DBI,DMAP1,DR1,DSCC1,EHHADH,ELP3,ELP4,EP300,EP400,EPC1,ESCO1,ESCO2,FOXO1,GOLGA7,GTF3C4,HAT1,HCFC1,HHAT,ING3,ING4,ING5,IRF4,KAT2A,KAT2B,KAT5,KAT6A,KAT6B,KAT7,KAT8,LDB1,LEF1,MAP3K7,MAP6D1,MBD3,MBIP,MCRS1,MDH2,MEAF6,MECP2,MED24,MORF4L1,MORF4L2,MSL1,MSL2,MSL3,MYOD1,NAA10,NAA11,NAA15,NAA16…	Human
NCB-CB	_tstat	within each collection	BP: GO biological process	GO_NEGATIVE_REGULATION_OF_TRANSMEMBRANE_RECEPTOR_PROTEIN_SERINE_THREONINE_KINASE_SIGNALING_PATHWAY	0.0101215	0.0425163	0.357228	1.5278	29	85	FBN2,LEMD3,SFRP1,VASN,WNT5A,LTBP1,ZNF451,FSTL3,PIN1,ADAM17,MECOM,ABL1,TWSG1,SMURF2,GLG1,SMAD2,SOSTDC1,STUB1,SYNJ2BP,NOTCH1,SKI,SKIL	22	0.258824	ABL1,ACVR1,ADAM17,ADAMTSL2,ASPN,BAMBI,BCL9L,BMPER,CAV1,CAV2,CD109,CHRD,CHRDL1,CHST11,CTDSPL2,DACT2,DNM2,EID2,ENG,FAM89B,FBN1,FBN2,FST,FSTL3,FZD1,GLG1,GREM1,GREM2,HIPK2,HSPA5,HTRA1,HTRA3,HTRA4,LEMD3,LTBP1,MAGI2,MECOM,MTMR4,NBL1,NOG,NOTCH1,ONECUT1,ONECUT2,PBLD,PDPK1,PEG10,PIN1,PMEPA1,PPM1A,PRDM16,RASL11B,RPS27A,SFRP1,SFRP2,SIRT1,SKI,SKIL,SMAD2,SMAD3,SMAD6,SMAD7,SMURF1,SMURF2,SNX25,SNX6,SOSTDC1,STRA…	Human
NCB-CB	_tstat	within each collection	BP: GO biological process	GO_SPERMATID_DIFFERENTIATION	0.0114094	0.0468249	0.358505	1.52971	33	83	PLA2G3,ODF2,REC8,IQCG,TTLL5,PANK2,FANCG,OSBP2,CABYR,RFX2,CATSPERB,KDM3A,CHD5,TBC1D20,SMARCA4,TBPL1,TTC26,CELF1,NPHP1,OCA2,TMF1,DPY19L2,SPAG6,SLIRP,TDRD5,MAST2,STRBP,HMGB2,DDX25,PYGO2,JAM3,PLD6,TRIP13	33	0.39759	ABHD2,ACRBP,AFF4,AGFG1,BAX,BBS2,BBS4,CABYR,CATSPERB,CCNB1IP1,CELF1,CEP57,CFTR,CHD5,CIB1,DDX25,DHH,DLD,DMC1,DPY19L2,FAM9B,FANCG,FNDC3A,HMGB2,HOOK1,HSPA2,ING2,INSL6,IQCG,JAM3,KDM3A,KIT,MAST2,MEI1,MKKS,NME5,NPHP1,NSUN2,OCA2,ODF2,OSBP2,PACRG,PAFAH1B1,PANK2,PCSK4,PIWIL1,PLA2G3,PLD6,PRKACA,PSME4,PTCHD3,PYGO1,PYGO2,QKI,RAN,REC8,RFX2,RHBDD1,RNF8,RSPH1,SIX5,SLC26A6,SLIRP,SMARCA2,SMARCA4,SPAG16,SPAG6,SRPK1…	Human
NCB-CB	_tstat	within each collection	BP: GO biological process	GO_REGULATION_OF_MUSCLE_TISSUE_DEVELOPMENT	0.00842886	0.0372899	0.355597	1.53304	24	89	SOX15,CENPF,DDX5,PIN1,CYP26B1,FGF9,LEF1,SIX4,WNT3A,LUC7L,BCL2,EFNB2,TP73,GPC1,ERBB4,IGFBP5,PPARGC1A,TWIST1,FGFR1,SIX1,SOX17,NOTCH1,DLL1,DDX17,HDAC4,NACA,CCNB1,CDK1,TBX1,CDON,MYOCD,TBX20	32	0.359551	ADRB2,AKAP6,ARNTL,BCL2,BMP10,BMP2,BMP4,CAPN3,CCNB1,CDK1,CDON,CENPF,CTDP1,CTNNB1,CYP26B1,DDX17,DDX39B,DDX5,DLL1,EFNB2,ERBB4,FBXO22,FGF2,FGF9,FGFR1,FGFR2,FLOT1,GATA6,GJA1,GPC1,GREM1,GSK3A,HDAC4,HDAC9,HEY2,HMGCR,IGFBP5,JPH2,KCNK2,LEF1,LUC7L,MAPK11,MAPK14,MEF2C,MEGF10,MTM1,MTOR,MTPN,MYOCD,MYOD1,MYOG,NACA,NKX2-5,NLN,NOG,NOTCH1,NR1D2,NRG1,PIN1,PPARGC1A,PRICKLE1,PRKAA1,RBP4,RBPJ,RPS6KB1,S100B,SAV1,SHH,S…	Human
NCB-CB	_tstat	within each collection	BP: GO biological process	GO_MAINTENANCE_OF_CELL_NUMBER	0.00625824	0.0295462	0.34062	1.53816	18	117	PCM1,SOX9,SFRP1,WNT7A,ASPM,POLR2D,FOXO3,POLR2H,HOOK3,TET1,METTL3,MED21,VANGL2,MED17,MED24,EZH2,SMAD2,LDB1,SOX4,DIS3L2,CTR9,PBX1,CDC73,FGFR1,NOTCH1,SKI,SOX2,HES1,DLL1,ASCL2,VPS72,MED28,MED27,SIX2,GATA2,BCL9,SMAD4,YAP1,NOTCH2,POLR2G,LIF,KLF4,JAG1,RIF1,LRP5,POLR2A	46	0.393162	ASCL2,ASPM,BCL9,BCL9L,BMPR1A,BRAF,CDC73,CDH2,CTNNB1,CTR9,CUL4A,DDX6,DIS3L2,DLL1,DPPA2,EIF4E,EIF4ENIF1,EOMES,EPAS1,EPHA1,EZH2,FGF10,FGF2,FGFR1,FOXD3,FOXO1,FOXO3,FUT10,FZD7,GATA2,HES1,HOOK3,IGF1,IGF2BP1,JAG1,KIT,KLF10,KLF4,LDB1,LDB2,LEO1,LIF,LIG4,LIN28A,LRP5,LSM1,MED10,MED12,MED14,MED17,MED21,MED24,MED27,MED28,MED30,MED7,METTL14,METTL3,MMP24,MTF2,NIPBL,NKAP,NOG,NOTCH1,NOTCH2,PAF1,PBX1,PCM1,PIWIL2,P…	Human
NCB-CB	_tstat	within each collection	BP: GO biological process	GO_NEURON_PROJECTION_DEVELOPMENT	0.000275	0.00530695	0.288136	1.53998	0	474	EFNA3,NLGN1,UNC5D,MAP2,LLGL1,NPTX1,KIF5A,GSK3B,NRXN3,ITGB1,NFIB,PTPRK,WNT5A,WNT7A,STMN1,KIDINS220,LRP4,KIF26B,FMOD,DPYSL5,EFHD1,LRRN1,LINGO2,TUBB3,PRELP,L1CAM,HDAC2,CELSR3,ERBB2,ROBO2,USP21,CAMSAP1,EFNA4,BRSK1,GLI2,RERE,BMP7,IGSF9,RPS6KA5,CHN1,STXBP1,PREX2,WNT3A,MYH10,ABL1,CALU,LRRN2,SLIT2,UCHL1,TOP2B,BTBD3,VANGL2,NR4A2,BCL2,CDH11,LHX1,EPHA7,EFNB2,PAX2,SRGAP2,APBB2,EZR,EPHA4,GPC1,TGFB2,RAC3,NTN1,…	155	0.327004	ABL1,ACSL4,ADCY1,ADM,AFG3L2,AGER,ALCAM,ALKBH1,ALS2,AMIGO1,ANK3,ANKRD27,APBB1,APBB2,APC,APOA1,APOA4,APOA5,APOD,APOE,APP,AREG,ARF4,ARFGEF1,ARTN,ATL1,ATP7A,ATP8A2,ATXN10,AURKA,B3GNT2,BAIAP2,BBS4,BCL11B,BCL2,BDNF,BLOC1S1,BLOC1S2,BLOC1S3,BMP7,BMPR1B,BOC,BRSK1,BRSK2,BTBD3,BTG2,CACNA1A,CALU,CAMSAP1,CAMSAP2,CAMSAP3,CDH1,CDH11,CDK16,CDK5,CDK5R1,CELSR2,CELSR3,CHL1,CHN1,CHST3,CLMN,CLU,CNP,CNR1,CNTN1,CNTN2,C…	Human
NCB-CB	_tstat	within each collection	BP: GO biological process	GO_BONE_DEVELOPMENT	0.00416	0.0212871	0.334538	1.5438	12	133	IFT80,SOX9,PRPSAP2,HOXB4,AXIN2,FGFR3,ANKRD11,GNAS,PAPPA2,FREM1,CYP26B1,SERPINH1,COL2A1,MSX1,LTF,THBS3,COL10A1,GLG1,COL1A1,COMP,HAS2,MMP14,TWIST1,FGF18,GLI3,BMPR1B,TULP3,MMP16,DLX5,CHSY1,NAB2,IFT172,SKI,MEGF8,SLC38A10,COL13A1,MEIS1	37	0.278195	ABI1,ACP5,AKAP13,ALPL,ANKRD11,ANO6,ANXA2,ASXL1,AXIN2,BBX,BGLAP,BMP2,BMP4,BMP6,BMPR1B,BMPR2,CARM1,CHAD,CHSY1,COL10A1,COL13A1,COL1A1,COL27A1,COL2A1,COMP,CSGALNACT1,CTC1,CYP26B1,DCHS1,DHRS3,DLX5,DYM,EP300,ESR1,FAM20C,FAT4,FGF18,FGFR2,FGFR3,FLI1,FOXP1,FREM1,GLG1,GLI3,GNAS,HAS2,HOXA11,HOXB4,HSD17B1,IFT172,IFT80,IGF1,IMPAD1,INPPL1,INSIG1,INSIG2,KIT,LRP5,LRRC17,LRRK1,LTF,MED1,MEF2C,MEF2D,MEGF8,MEIS1,MMP…	Human
NCB-CB	_tstat	within each collection	BP: GO biological process	GO_REGULATION_OF_OSSIFICATION	0.00567465	0.0273093	0.328421	1.54571	17	152	FBN2,PLA2G4A,SOX9,NELL1,SOX11,SFRP1,PTCH1,WNT5A,AXIN2,LRP4,GNAS,DDX5,INTU,NPNT,OSR1,CDK6,WNT4,BMP7,LTF,TP63,TWSG1,BCL2,ACVR2B,TGFB2,HAND2,IGFBP5,GPM6B,PIAS2,PBX1,ACVR2A,TWIST1,GLI3,BMPR1B,JUND,FGFR1,DLX5,CHSY1,NOTCH1,SKI,CTHRC1,AREG	41	0.269737	ACVR1,ACVR2A,ACVR2B,ADRB2,AHSG,ANKH,ANO6,AREG,ATP6AP1,AXIN2,BCL2,BCOR,BGLAP,BMP2,BMP2K,BMP4,BMP6,BMP7,BMPR1A,BMPR1B,BMPR2,CCL3,CCR1,CD276,CDK6,CEBPA,CEBPB,CHRD,CHSY1,CLIC1,CSF1,CTHRC1,CTNNB1,CTNNBIP1,CYP27B1,DDR2,DDX5,DHRS3,DLX5,ECM1,EGR2,ENPP1,ESRRA,FAM20C,FBN2,FGFR1,FGFR2,FZD1,GDF10,GDF2,GJA1,GLI1,GLI3,GNAS,GPM6B,GREM1,HAND2,HDAC4,HDAC7,HGF,HIF1A,HOXA2,ID1,ID2,ID3,ID4,IFITM1,IGF1,IGFBP5,IL6,IL6…	Human
NCB-CB	_tstat	within each collection	BP: GO biological process	GO_RESPONSE_TO_TRANSFORMING_GROWTH_FACTOR_BETA	0.00445576	0.0224105	0.335688	1.54932	13	132	UBE2M,MAPK7,SOX9,SFRP1,FNTA,ITGB1,PTPRK,WNT5A,WNT7A,FMOD,SOX5,NEDD8,HDAC2,F11R,WNT4,FUT8,COL4A2,TGFB2,RUNX3,JUN,GDF5,COL1A1,SMAD2,PPARGC1A,DNMT1,PRKCZ,MAP3K7,SKI,SKIL,WNT10A,COL3A1,FN1,EDN1,COL1A2,TGFBR1,ARG1,LTBP2,FKBP1A,SMAD4,BAMBI,GDF15,PDGFD,HYAL2,PDGFB	44	0.333333	ACVR1,ACVRL1,ADAM9,APAF1,APOA1,ARG1,ARHGEF18,ARRB2,BAMBI,BMPR1A,CAV1,CBL,CCL2,CCL5,CDH5,CGN,CLDN5,CLEC3B,COL1A1,COL1A2,COL3A1,COL4A2,CREB1,CX3CR1,DNMT1,DUSP15,DUSP22,EDN1,EID2,ENG,EPB41L5,F11R,FBN1,FERMT2,FKBP1A,FMOD,FN1,FNTA,FOS,FOXH1,FURIN,FUT8,FYN,GCNT2,GDF10,GDF15,GDF5,GDF9,HDAC2,HIPK2,HPGD,HYAL2,ID1,IL1R1,ITGB1,ITGB5,JUN,KLF10,LEFTY1,LEFTY2,LIMS1,LTBP2,MAP3K7,MAPK7,MEF2C,MEN1,MTMR4,NEDD8,NLK…	Human
NCB-CB	_tstat	within each collection	BP: GO biological process	GO_CARDIAC_CHAMBER_DEVELOPMENT	0.00420848	0.0214672	0.339254	1.55331	12	127	FZD2,FRS2,SOX11,SCN5A,WNT5A,LTBP1,LRP2,DVL3,ARID1A,AP2B1,FGFRL1,PTK7,COL11A1,MYH10,VANGL2,HAND2,SOX4,ADAMTS6,DSP,STRA6,MESP1,TRIP11,NOTCH1,SMARCD3,HES1,SMO,UBE4B,NACA,LUZP1,MDM2,TBX1,PPP1R13L,MYOCD,TBX20,FKBP1A,SMAD4,HIF1A,MED1,OVOL2,NOTCH2	40	0.314961	ACVR1,ADAMTS1,ADAMTS6,ANK2,AP2B1,ARID1A,BMP10,BMP4,CITED2,COL11A1,CPE,CRELD1,DCTN5,DHRS3,DLL4,DNM2,DSP,DVL3,EGLN1,FGFR2,FGFRL1,FHL2,FKBP1A,FOXC1,FOXC2,FOXF1,FOXH1,FRS2,FZD1,FZD2,GATA3,GATA4,GATA6,GJA5,GRHL2,GSK3A,HAND2,HEG1,HES1,HEY1,HEY2,HEYL,HIF1A,ID2,JAG1,KCNK2,LMO4,LRP2,LTBP1,LUZP1,MAML1,MDM2,MED1,MEF2C,MESP1,MSX2,MYH10,MYL3,MYOCD,NACA,NDST1,NKX2-5,NOTCH1,NOTCH2,NPHP3,NPRL3,NRG1,OVOL2,PARVA,P…	Human
NCB-CB	_tstat	within each collection	BP: GO biological process	GO_REGULATION_OF_NEURAL_PRECURSOR_CELL_PROLIFERATION	0.00998967	0.0422861	0.388537	1.55764	28	59	WNT5A,PTBP2,ASPM,FOXO3,GLI2,WNT3A,SIX3,KDM1A,LHX1,TRIM71,CEND1,NF1,GLI3,NOTCH1,SMARCD3,SPINT1,FZD3,SMO,DISC1,GATA2,DCT,BTG2,CDON,HIF1A,NES,VEGFA	26	0.440678	ASPM,BTG2,CCR2,CDH2,CDON,CEND1,CTNNA1,CTNNB1,CX3CL1,CX3CR1,DCT,DISC1,DLL4,DRD2,EGF,ELL3,FOXO1,FOXO3,FZD3,GATA2,GLI1,GLI2,GLI3,GNG5,GPR37L1,HIF1A,ID2,IL1B,ILK,KCTD11,KDM1A,KDM2B,LHX1,LIMS2,LRRK2,LYN,NES,NF1,NF2,NOTCH1,PAX6,PROX1,PTBP2,PTPRZ1,RAPGEF1,SHCBP1,SHH,SIRT2,SIX3,SMARCD3,SMO,SOX10,SPINT1,TRIM71,VEGFA,VEGFC,WNT3A,WNT5A,ZNF335	Human
NCB-CB	_tstat	within each collection	BP: GO biological process	GO_NUCLEAR_ENVELOPE_ORGANIZATION	0.0108511	0.0449905	0.373627	1.55949	31	74	TPR,CHMP2A,NUP107,SUN1,TOR1AIP2,RAE1,NUP160,TMEM43,REEP4,NUP214,AKAP8L,PLK1,CTDNEP1,NSFL1C,NUP188,PPP2R1A,NUP35,SEH1L,CCNB2,NUP85,ANKLE2,CCNB1,SPAST,CDK1,PARP11,LPIN1,VRK1,NDEL1,LEMD2,TOR1A,TARDBP,PPP2R2A,POM121C,NUP37,NUP133,POM121,DMPK,NUP88,NEK9,NUP205,RANBP2,NUP210,NUP98	43	0.581081	AAAS,AKAP8L,ANKLE2,BANF1,CCNB1,CCNB2,CDK1,CHMP2A,CHMP4B,CHMP7,CTDNEP1,DMPK,EMD,LEMD2,LMNA,LPIN1,NDEL1,NEK6,NEK9,NSFL1C,NUP107,NUP133,NUP153,NUP155,NUP160,NUP188,NUP205,NUP210,NUP214,NUP35,NUP37,NUP43,NUP50,NUP54,NUP62,NUP85,NUP88,NUP93,NUP98,NUPL2,OSBPL8,PAFAH1B1,PARP11,PLK1,POM121,POM121C,PPP2CA,PPP2R1A,PPP2R2A,PRKCA,PRKCB,RAE1,RANBP2,REEP3,REEP4,SEH1L,SPAG4,SPAST,SUMO1,SUN1,SUN2,SYNE2,TARDBP,TM…	Human
NCB-CB	_tstat	within each collection	BP: GO biological process	GO_DEVELOPMENTAL_GROWTH	0.00088	0.00642343	0.306367	1.56577	2	291	KDM5B,SOX9,SFRP1,SOX15,ITGB1,WNT5A,WNT7A,TRIM28,LRP4,FGFR3,KIF26B,ANKRD11,FMOD,GNAS,ASPM,FOXO3,GINS1,CDKN1C,PTK7,GLI2,RAD51B,GINS4,TBL1XR1,WNT3A,SPRY1,ABL1,SLIT2,VANGL2,BCL2,THBS3,LRP6,RMI1,LHX1,MEX3C,BRCA2,ERBB4,ACVR2B,TGFB2,IGFBP5,EZH2,EREG,SEMA3F,SMAD2,COMP,SPTBN2,SORBS2,SLIT1,FLRT3,BIN3,WDR48,GPD2,CTR9,DHCR7,GLI3,BMPR1B,PRKCZ,STRA6,MESP1,ALKBH1,ALCAM,NOTCH1,SOX2,XRCC2,ULK2,AREG,SMO,CPNE1,DLL1…	105	0.360825	ABL1,ACVR2B,ADAM15,ADD1,ADM,ADRA1A,AGT,AGTR2,ALCAM,ALKBH1,ANKRD11,ANXA1,APBA1,APBA2,APOA5,APOD,APP,AREG,ARID5B,ARIH2,ASPM,ATF5,ATRX,AURKA,BCL2,BCL9,BDNF,BIN3,BMP10,BMP4,BMPR1A,BMPR1B,BNC2,BRCA2,CAMK2D,CCL11,CCM2,CCNB1,CCNE1,CDC42,CDK5,CDKN1C,CFLAR,CHRNA1,CHRND,CHST11,CLIC4,COBL,COL27A1,COMP,CPNE1,CSF1,CTC1,CTR9,CYFIP1,DCLK1,DDR2,DHCR7,DLL1,DMBX1,DUOX2,DVL1,EFNA5,EIF2AK4,EIF4H,EN1,ENO3,EPB41L5,EPY…	Human
NCB-CB	_tstat	within each collection	BP: GO biological process	GO_REGULATION_OF_WNT_SIGNALING_PATHWAY	0.000587	0.00532009	0.307155	1.56583	1	284	NKD1,RNF146,IFT80,DKK3,GSK3B,SOX9,SFRP1,TNKS,WNT5A,WNT7A,AXIN2,LRP4,DKK2,CSNK2A1,WIF1,ASPM,PIN1,DVL3,NKD2,WLS,FOXO3,ZNRF3,APCDD1,FGF9,WNT4,KLHL12,LEF1,CHD8,LGR5,TCF7L1,WNT3A,SIX3,ABL1,VANGL2,DVL2,TSC2,SENP2,LRP6,CSNK1E,ZNF703,NRARP,JUP,SMARCA4,SMURF2,ROR2,CSNK1D,PSMD2,COL1A1,PSMC5,SOX4,SOSTDC1,MDFI,PPP2R3A,TAX1BP3,CDC73,SPIN1,PSMD14,IFT20,GLI3,NPHP4,CTDNEP1,NXN,DLX5,SOX17,MESP1,LGR6,NOTCH1,DAPK3,…	72	0.253521	ABL1,ANKRD10,ANKRD6,APC,APC2,APCDD1,APOE,ARNTL,ASPM,ATP6AP2,ATP6V0C,ATP6V1C2,AXIN1,AXIN2,BAMBI,BARX1,BICC1,BMP2,BTRC,CAPRIN2,CAV1,CBY1,CCND1,CCNY,CDC73,CDH2,CDK14,CHD8,COL1A1,CSNK1A1,CSNK1D,CSNK1E,CSNK2A1,CTDNEP1,CTHRC1,CTNNBIP1,CTNND1,CTNND2,CUL3,CXXC4,CYLD,DAB2,DAB2IP,DACT1,DACT2,DACT3,DAPK3,DCDC2,DDIT3,DEPDC1B,DISC1,DIXDC1,DKK2,DKK3,DLX5,DVL1,DVL2,DVL3,EDA,EGR1,EMD,FGF10,FGF9,FGFR2,FOLR1,FOXL1…	Human
NCB-CB	_tstat	within each collection	BP: GO biological process	GO_REGULATION_OF_BMP_SIGNALING_PATHWAY	0.00964187	0.041137	0.389663	1.57206	27	62	LEMD3,SOX11,SFRP1,WNT5A,UBE2O,FSTL3,ZNF423,MSX1,ABL1,TWSG1,GDF5,SMAD2,SOSTDC1,ACVR2A,NOTCH1,SKI,HES1	17	0.274194	ABL1,ACVR2A,ACVRL1,BMP4,BMPER,BMPR2,CAV1,CHRD,CHRDL1,CRB2,CTDSPL2,ENG,FBN1,FBXL15,FKBP8,FOXD1,FSTL3,FZD1,GATA4,GATA6,GDF2,GDF5,GPC3,GREM1,GREM2,HES1,HIPK2,HTRA1,HTRA3,ILK,ITGA3,KCP,LEMD3,MSX1,MSX2,NBL1,NEO1,NOG,NOTCH1,PCSK6,PPM1A,RBPJ,RNF165,SFRP1,SFRP2,SKI,SMAD2,SMAD4,SMAD6,SMAD7,SMURF1,SOSTDC1,SOX11,SULF1,TMPRSS6,TOB1,TRIM33,TWSG1,UBE2O,WNT5A,XIAP,ZNF423	Human
NCB-CB	_tstat	within each collection	BP: GO biological process	GO_FIBROBLAST_GROWTH_FACTOR_RECEPTOR_SIGNALING_PATHWAY	0.00945307	0.0405454	0.377884	1.57273	27	72	FRS2,FGF12,FGFR3,GTF2F1,POLR2D,POLR2H,FGF19,FGFRL1,FGF9,NCBP2,FGFBP1,HNRNPM,GALNT3,NCBP1,TRIM71,FLRT3,FGF18,ESRP1,FGFR1,TIA1,HNRNPH1,RBFOX2,HNRNPA1,SETX,FLRT2,POLR2G,FLRT1,KIF16B,POLR2A,ESRP2,FGFR2	31	0.430556	CBL,CEP57,ESRP1,ESRP2,FGF1,FGF10,FGF12,FGF14,FGF17,FGF18,FGF19,FGF2,FGF7,FGF9,FGFBP1,FGFR1,FGFR2,FGFR3,FGFR4,FGFRL1,FIBP,FLRT1,FLRT2,FLRT3,FRS2,FRS3,GALNT3,GRB2,GTF2F1,GTF2F2,HNRNPA1,HNRNPF,HNRNPH1,HNRNPM,IQGAP1,KIF16B,KL,KLB,MAPK1,MAPK3,NCBP1,NCBP2,NDST1,NOG,POLR2A,POLR2B,POLR2C,POLR2D,POLR2E,POLR2F,POLR2G,POLR2H,POLR2I,POLR2J,POLR2K,POLR2L,PTBP1,PTPN11,RAB14,RBFOX2,RPS27A,SETX,SHCBP1,SHOC2,SPRE…	Human
NCB-CB	_tstat	within each collection	BP: GO biological process	GO_NUCLEAR_EXPORT	0.00318776	0.0172395	0.339553	1.57319	9	138	TPR,GSK3B,LSG1,POLR2D,CDC40,NUP107,TSC1,CPSF3,U2AF2,SMG7,NOL6,RBM8A,NCBP2,SRSF2,STRADA,NCBP1,RAE1,HNRNPA2B1,NUP160,ZC3H11A,NXT1,NUP214,EIF4A3,RPS28,SRSF3,SRSF5,NUP188,NEMF,XPO7,NUP35,THOC5,SEH1L,NUP85,CPSF2,SARNP,DDX25,CHTOP,RNPS1,XPO1,HNRNPA1,SRSF10,THOC6,RRS1,SRSF1,SRSF6,NXF2B,GLE1,ADAR,SRSF4,CALR,CSE1L,LZTS2,SRRM1,POM121C,DDX39A,NUP37,NUP62CL,ALKBH5,PKD1,NXF2,XPO5,RAN,XPOT,NUP133,POM121,CASC3,…	78	0.565217	AAAS,ADAR,AGFG1,AHCYL1,AKAP13,ALKBH5,ATXN1,BUD13,CALR,CASC3,CCHCR1,CDC40,CHTOP,CPSF1,CPSF2,CPSF3,CSE1L,DDX19A,DDX19B,DDX25,DDX39A,DDX39B,DHX38,DUSP16,EGR2,EIF4A3,EIF4E,EIF5A,EIF6,ENY2,FIP1L1,FYTTD1,GLE1,GSK3B,HHEX,HNRNPA1,HNRNPA2B1,HSPA9,LSG1,LZTS2,MAGOH,MALT1,NCBP1,NCBP2,NEMF,NMD3,NOL6,NUP107,NUP133,NUP153,NUP155,NUP160,NUP188,NUP205,NUP210,NUP214,NUP35,NUP37,NUP43,NUP50,NUP54,NUP62,NUP62CL,NUP8…	Human
NCB-CB	_tstat	within each collection	BP: GO biological process	GO_GASTRULATION	0.00288	0.0159485	0.341193	1.57451	8	133	RNF2,FRS2,SFRP1,COL7A1,ITGB1,HMGA2,WNT5A,WLS,BMP7,COL11A1,LEF1,WNT3A,TWSG1,COL4A2,VANGL2,DVL2,EYA1,COL8A1,LRP6,LHX1,PAX2,KDM6B,ACVR2B,INHBA,SMAD2,LDB1,CTR9,EYA2,ACVR2A,MMP14,CDC73,FOXA2,ITGA2,ZBTB17,SOX17,MESP1,MEGF8,SOX2,FN1,ITGB4,PRKAR1A,EXOC4,SNAI1,SIX2,TBX20,EXT2,SMAD4,EPHA2,HOXA11,LAMB1,DUSP2,MMP2,KIF16B,KLF4,MKKS,LRP5,FGFR2	57	0.428571	ACVR1,ACVR2A,ACVR2B,AMOT,APLNR,ARFRP1,ATOH8,AXIN1,BMP4,BMP7,BMPR1A,BMPR2,CDC73,CHRD,COL11A1,COL12A1,COL4A2,COL6A1,COL7A1,COL8A1,CRB2,CTNNB1,CTR9,CUL3,DLD,DUSP1,DUSP2,DUSP4,DUSP5,DVL1,DVL2,EOMES,EPB41L5,EPHA2,ETS2,EXOC4,EXT1,EXT2,EYA1,EYA2,FGFR2,FN1,FOXA2,FOXC1,FOXC2,FOXF1,FRS2,GATA6,GPI,GSC,HHEX,HIRA,HMGA2,HNF1B,HOXA11,HSBP1,INHBA,ITGA2,ITGA3,ITGA4,ITGA5,ITGA7,ITGA8,ITGAV,ITGB1,ITGB2,ITGB3,ITGB4,…	Human
NCB-CB	_tstat	within each collection	BP: GO biological process	GO_CHROMOSOME_LOCALIZATION	0.0100277	0.0423915	0.399842	1.57543	28	54	SPICE1,CHMP2A,CENPF,KIF14,KIF18A,BIRC5,KIF2C,BRCA2,CDCA8,TERF1,DLGAP5,PIBF1,KIFC1,PSRC1,KATNB1,CHMP1B,SEH1L,CHMP1A,CCNB1,NDEL1,CENPE,CDCA5,RRS1,NDE1	24	0.444444	ACTR2,ACTR3,ATM,BECN1,BIRC5,BRCA2,CCDC155,CCNB1,CDC23,CDCA5,CDCA8,CENPE,CENPF,CEP55,CHMP1A,CHMP1B,CHMP2A,CHMP2B,CHMP3,CHMP4A,CHMP4B,CHMP4C,CHMP5,CHMP6,CHMP7,CUL3,DLGAP5,FAM83D,GEM,KATNB1,KIF14,KIF18A,KIF22,KIF2C,KIFC1,KPNB1,MEI1,MLH1,NDE1,NDEL1,NUP98,PDCD6IP,PIBF1,PINX1,PSRC1,RAB11A,RRS1,SEH1L,SPICE1,TERF1,UBE2B,VPS4A,VPS4B,ZW10	Human
NCB-CB	_tstat	within each collection	BP: GO biological process	GO_REGULATION_OF_RNA_SPLICING	0.00538902	0.0261302	0.366202	1.57552	15	88	TRA2B,RBM4,SFSWAP,PTBP2,DDX5,SNW1,U2AF2,RBM8A,SF3B4,RBM25,CELF4,SRSF2,HNRNPA2B1,CLK2,HSPA1A,CELF1,JMJD6,ESRP1,SRSF3,CWC22,RBMX,TIA1,HNRNPK,HNRNPH1,SRPK2,RBM15B,RBFOX1,ACIN1,SF3A1,RNPS1,RBFOX2,SETX,SRSF10,SRSF6,PRPF19,SRSF4,HSPA8,POLR2A,NSRP1,ESRP2	40	0.454545	ACIN1,AFF2,AHNAK,AKAP17A,AKT2,C1QBP,CDK12,CELF1,CELF4,CELF6,CLK1,CLK2,CLK3,CLK4,CWC22,DAZAP1,DDX5,DYRK1A,ERN1,ESRP1,ESRP2,FASTK,FMR1,HNRNPA2B1,HNRNPF,HNRNPH1,HNRNPK,HNRNPL,HSPA1A,HSPA8,JMJD6,MAGOH,MBNL1,MBNL2,MBNL3,MYOD1,NSRP1,PIK3R1,POLR2A,PQBP1,PRPF19,PTBP1,PTBP2,RBFOX1,RBFOX2,RBFOX3,RBM10,RBM11,RBM15B,RBM20,RBM22,RBM25,RBM38,RBM4,RBM42,RBM5,RBM8A,RBMX,RNPS1,RPS13,RPS26,SAP18,SETX,SF3A1,SF3B4,S…	Human
NCB-CB	_tstat	within each collection	BP: GO biological process	GO_POSITIVE_REGULATION_OF_CELL_DIVISION	0.00530152	0.025821	0.356102	1.57566	15	101	EDN3,WNT5A,DMRT1,PLCB1,FGF9,WNT4,KIF14,MSX1,BIRC5,MACC1,ECT2,MDK,IGF2,AURKB,TGFB2,TERF1,TAS2R13,DLGAP5,UBE2C,EREG,RACGAP1,PTN,KIF23,PLK1,RB1,CIT,CDC6,EDN1,PPBP,ESPL1,AURKA,SPAST,CSPP1,CDC25B,KIF20B,CDCA5,VEGFA,PDGFD,PDGFB,GIPC1,GOLGA2,SVIL,PDGFA,SMC5,FBXO5,LRP5,FGFR2,PHIP	48	0.475248	ANAPC10,ANAPC11,AURKA,AURKB,BECN1,BIRC5,BTC,CAT,CD28,CDC25B,CDC42,CDC6,CDCA5,CENPV,CIT,CSPP1,CUL3,CXCR5,DLGAP5,DMRT1,DRD2,ECT2,EDN1,EDN3,EGF,EREG,ESPL1,FBXO5,FGF1,FGF2,FGF7,FGF9,FGFR2,GIPC1,GOLGA2,GORASP1,H2AFY,HTR2B,IGF1,IGF2,IL1B,INSR,ITGB1BP1,KIF14,KIF20B,KIF23,KIF3B,LRP5,MACC1,MDK,MSX1,MSX2,NKX3-1,NPM2,NSMCE2,NUSAP1,OSM,PDGFA,PDGFB,PDGFC,PDGFD,PDGFRB,PGF,PHB2,PHIP,PIWIL2,PKN2,PKP4,PLCB1,PLK1,…	Human
NCB-CB	_tstat	within each collection	BP: GO biological process	GO_GERM_CELL_DEVELOPMENT	0.002849	0.0158311	0.336744	1.57574	8	145	PLA2G3,RNF2,ODF2,REC8,SOHLH2,IQCG,YBX2,DMRT1,TTLL5,ASPM,PANK2,FANCG,FOXO3,ETV5,OSBP2,CABYR,WNT4,RFX2,LGR5,CATSPERB,CELF4,KDM3A,BCL2,CHD5,TBC1D20,SMARCA4,BRCA2,TBPL1,TTC26,EREG,CELF1,BMPR1B,OCA2,TMF1,DPY19L2,SPAG6,SLIRP,TDRD5,STRBP,HMGB2,CCNB1,ZNF830,DDX25,PYGO2,ZGLP1,CDC25B,DZIP1,JAM3,PLD6,TRIP13,RPS6KA2	51	0.351724	ABHD2,ACRBP,ACVR1,AFF4,AGFG1,AKT1,AMH,ANG,ANGPT2,ASPM,ATM,BAX,BBS2,BBS4,BCL2,BCL2L1,BMP4,BMPR1B,BRCA2,CABYR,CATSPERB,CCDC155,CCNB1,CCNB1IP1,CDC25B,CELF1,CELF4,CEP57,CFTR,CHD5,CIB1,CTNNB1,DDX20,DDX25,DEAF1,DHH,DIAPH2,DLD,DMC1,DMRT1,DPY19L2,DZIP1,ERCC1,EREG,ETV5,FAM9B,FANCG,FBXO5,FNDC3A,FOXL2,FOXO3,GDF9,HEXB,HMGB2,HOOK1,HORMAD1,HSPA2,ING2,INHBB,INSL6,IQCG,JAM3,KDM3A,KIT,LGR5,LIN28A,MEI1,MKKS,MLH1,M…	Human
NCB-CB	_tstat	within each collection	BP: GO biological process	GO_NEGATIVE_REGULATION_OF_CELL_CYCLE_PHASE_TRANSITION	0.00351775	0.0186193	0.342006	1.5786	10	134	TPR,SOX11,CENPJ,HMGA2,ZNF207,CENPF,CSNK2A1,PRKDC,E2F7,MDM4,CNOT3,TP63,SUSD2,CNOT7,BCL2,CLSPN,SMARCA4,TP73,TERF1,BUB1,EZH2,SOX4,CDC25C,CDC73,TFDP2,OVOL1,PLK1,GTSE1,RB1,TTK,PRMT1,TNKS1BP1,MUC1,CCNA2,PRMT2,E2F1,BLM,CCND1,CCNB1,ZNF655,MDM2,BTG2,AURKA,CNOT2,CDK1,ZNF830,BUB1B,MAD2L1,MAD2L2,FANCI,PCNA	51	0.380597	APC,ARID3A,ATF5,ATM,AURKA,BAX,BCL2,BLM,BRD7,BTG2,BUB1,BUB1B,BUB3,C10orf99,CARM1,CASP2,CCNA2,CCNB1,CCND1,CDC25C,CDC5L,CDC73,CDK1,CDK2,CDK5RAP3,CDKN1A,CDKN1B,CDKN2B,CENPF,CENPJ,CHEK2,CLSPN,CNOT1,CNOT10,CNOT2,CNOT3,CNOT4,CNOT6,CNOT6L,CNOT7,CNOT8,CRADD,CSNK2A1,CSNK2A2,CTDSP1,CTDSP2,CTDSPL,DACT1,DGKZ,E2F1,E2F4,E2F7,EP300,EZH2,FANCI,FBXO31,FBXO7,FHL1,FOXN3,FOXO4,GADD45A,GIGYF2,GPR132,GTSE1,H2AFY,HMGA2,…	Human
NCB-CB	_tstat	within each collection	BP: GO biological process	GO_OSSIFICATION	0.00120084	0.00828042	0.31824	1.58001	3	224	DHX36,IFT80,SOX9,SFRP1,AXIN2,FGFR3,SNRNP200,FSTL3,GNAS,SUN1,COL2A1,FGF9,GLI2,DHX9,PTGS2,BMP7,COL11A1,LEF1,CREB3L1,WNT3A,RPL38,LTF,ERH,TWSG1,BCL2,THBS3,COL10A1,IGF2,CDH11,KAZALD1,IGFBP5,RUNX3,COL1A1,GPM6B,CLTC,PTN,MMP14,NF1,TWIST1,FGF18,EGFR,JUND,MMP16,EIF2AK3,DLX5,NAB2,RBMX,FASN,ASF1A,VCAN,SOX2,CTHRC1,SP3,SMO,SND1,COL13A1,MYBBP1A,HNRNPU,HDAC4,FAT4,GTPBP4,SNAI1,PDLIM7,TPM4,FIGNL1,BMP1,RRBP1,ATP6V0…	70	0.3125	ACHE,ACP5,ADAR,AHSG,AKT1,ALPL,ANO6,ASF1A,ASGR2,ASPN,ATP6V0A4,ATP6V1B1,AXIN2,BCAP29,BCL2,BGLAP,BMP1,BMP2,BMP3,BMP4,BMP5,BMP6,BMP7,BMP8A,BMP8B,CASR,CAT,CBFB,CCDC47,CCL3,CDH11,CHRD,CHRDL1,CHRDL2,CLEC3B,CLEC5A,CLTC,COL10A1,COL11A1,COL13A1,COL1A1,COL2A1,COL5A2,COL6A1,CREB3L1,CSF1,CSGALNACT1,CTHRC1,CTSK,CYP24A1,CYP27B1,DCHS1,DDR2,DDX21,DHX36,DHX9,DLX5,DNAJC13,DUOX2,ECM1,EGFR,EIF2AK3,EPHA2,ERCC2,ERH,ESR…	Human
NCB-CB	_tstat	within each collection	BP: GO biological process	GO_POSITIVE_REGULATION_OF_STEM_CELL_PROLIFERATION	0.00857339	0.0377743	0.395174	1.58019	24	58	SOX9,SOX11,HMGA2,WNT5A,ASPM,FGF9,TP63,KDM1A,MYCN,GLI3,FGFR1,SIX1,NOTCH1,SMARCD3,FZD3,SMO,TERT,DISC1,EPCAM,DCT,TBX1,HIF1A,VEGFA,SIRT6,PDGFA,LRP5,FGFR2,IRS2	28	0.482759	ASPM,ATXN1L,BMP4,BMPR1A,CHRD,CTNNB1,CX3CL1,CX3CR1,DCT,DISC1,DPPA2,DRD2,EPCAM,FBXW4,FGF9,FGFR1,FGFR2,FOXF1,FOXP2,FZD3,GLI3,HIF1A,HMGA2,IRS2,KDM1A,KITLG,LRP5,LTBP3,MYC,MYCN,N4BP2L2,NOTCH1,PAX6,PDCD2,PDGFA,PRRX1,PTPRC,SHH,SHOX2,SIRT6,SIX1,SMARCD3,SMO,SOX10,SOX11,SOX9,STAT1,TBX1,TBX3,TERT,TGFBR2,THPO,TP63,VEGFA,VEGFC,WNT2,WNT5A,ZNF335	Human
NCB-CB	_tstat	within each collection	BP: GO biological process	GO_NEGATIVE_REGULATION_OF_CELL_DEVELOPMENT	0.00119048	0.0082265	0.31376	1.58071	3	258	NKX6-1,PCM1,NLGN1,GSK3B,SOX9,SOX11,SFRP1,VASN,ITGB1,WNT5A,WNT7A,DNM3,CDK5RAP2,LRP4,ASPM,HDAC2,KIAA0319,NOTCH3,INPP5J,HOOK3,SPOCK1,ARHGDIA,BMP7,MIB1,VIM,WNT3A,PSEN1,LTF,SIX3,SLIT2,BCL2,EPHA7,PAX2,SRGAP2,EPHA4,TP73,ERBB4,TGFB2,GPR173,NTN1,SEMA3F,SEMA4C,PTN,FKBP4,PBX1,FOXA2,NF1,NRG3,MYCN,GLI3,PAX8,STMN2,MBD1,NOTCH1,SEMA6A,SKI,CBFA2T2,SOX2,ULK2,HES1,COL3A1,DLL1,MEIS1,RCC2,DAB1,ISL2,ASCL2,LRP1,CNTN4,E…	94	0.364341	ACTN4,ADCY6,AP1AR,APOE,APP,ARF6,ARHGAP4,ARHGDIA,ARHGEF1,ARHGEF2,ASAP1,ASCL2,ASPM,ATF5,B2M,BAG5,BCL11A,BCL2,BMP4,BMP5,BMP7,BMPR1A,CALR,CARM1,CAV1,CBFA2T2,CCR2,CDK5,CDK5R1,CDK5RAP2,CERS2,CIB1,CNTF,CNTN2,CNTN4,COL3A1,CORO1C,CRMP1,CTDP1,CTDSP1,CTNNA1,CTNNB1,DAB1,DAB2IP,DACT3,DCC,DDX6,DGUOK,DICER1,DIXDC1,DLL1,DLL3,DNM3,DPYSL3,DTX1,DUSP10,DYNLT1,EDNRB,EFEMP1,EFNA1,EFNA5,EIF2AK4,EIF4E,EIF4ENIF1,EPHA4,EP…	Human
NCB-CB	_tstat	within each collection	BP: GO biological process	GO_SEXUAL_REPRODUCTION	0.000273	0.00530695	0.295796	1.58463	0	483	IFT81,KDM5B,SPATA6,PLA2G4A,PLA2G3,RNF2,ODF2,SOX9,REC8,SOHLH2,IQCG,CCT2,ITGB1,YBX2,TRIM36,DMRT1,WFDC2,FSTL3,MCM8,PLCB1,TTLL5,ASPM,PANK2,HSF2,UBAP2L,WDR33,FANCG,FOXO3,ETV5,ADAM21,CYP26B1,SSTR3,PGAM2,XRN2,DNAH9,TSNAXIP1,MYCBPAP,OSBP2,DIAPH3,CABYR,PTGS2,ADAM20,WNT4,KDM5A,HERPUD2,ZNF35,FOXJ1,RFX2,LGR5,RPL39L,ATP2B4,TP63,PICK1,GGNBP2,TMEM203,SLC4A2,SPATA5,CATSPERB,CELF4,CXADR,KDM3A,BCL2,CHD5,PATZ1,MCM9…	149	0.308489	AAAS,ABAT,ABHD2,ACE,ACOX1,ACRBP,ACVR1,ACVR2A,ADAM20,ADAM21,ADAM28,ADAMTS1,ADAMTS2,ADCY10,ADCY3,ADCYAP1R1,AFF4,AFP,AGFG1,AKAP3,AKT1,ALKBH5,AMH,ANG,ANGPT2,ANKRD49,APOB,APP,ARID4A,ARID4B,ARNTL,ASF1B,ASPM,ATAT1,ATM,ATP2B4,ATP8B3,ATRX,AVPR1A,AXL,B4GALNT1,B4GALT1,BAD,BAG6,BAX,BBS2,BBS4,BCAP31,BCL2,BCL2L1,BCL2L10,BCL2L11,BCL2L2,BCL6,BIK,BIRC3,BMP4,BMPR1B,BRCA2,BRD2,CABYR,CADM1,CALR,CAST,CATSPER2,CATSPER…	Human
NCB-CB	_tstat	within each collection	BP: GO biological process	GO_CELL_FATE_COMMITMENT	0.00154847	0.00999549	0.331967	1.58543	4	170	NKX6-1,SOX9,SFRP1,ITGB1,PTCH1,WNT5A,WNT7A,SOX5,PRKDC,TBX19,SOX12,ZNF521,NOTCH3,CYP26B1,GLI2,WNT4,WNT3A,PSEN1,EYA1,BCL2,CHD5,PAX2,KDM6B,ERBB4,TGFB2,FOXN1,ROR2,WNT9A,SMAD2,DMRT3,CTR9,EYA2,CDC73,FOXA2,FOXN4,PPDPF,GLI3,SIX1,SOX17,MESP1,NOTCH1,SOX2,WNT10A,HES1,SMO,DLL1,ISL2,TRPS1,TGFBR1,SIX2,GATA2,TBX1,CDON	53	0.311765	ACVR1,APC,APC2,AXIN1,BATF,BCL11B,BCL2,BMP2,BMP4,CASP3,CDC42,CDC73,CDON,CEBPB,CHD5,CTNNB1,CTR9,CYP26B1,DLL1,DLL4,DMRT3,DOCK7,DSCAML1,EBF2,EOMES,EPAS1,ERBB4,ETS2,EYA1,EYA2,FGF10,FGF13,FGFR2,FKBP8,FOXA1,FOXA2,FOXC2,FOXN1,FOXN4,FOXP3,GAS1,GATA2,GATA3,GATA4,GATA5,GATA6,GDF7,GLI2,GLI3,GSC,HES1,HEY2,HNF1B,HOXA11,HOXA2,HOXC10,HOXD10,ID2,IFRD1,IL6,IL7,IRF4,ISL2,ITGB1,JAG1,JAG2,KDM6B,KLF4,LATS1,LATS2,LEO1,…	Human
NCB-CB	_tstat	within each collection	BP: GO biological process	GO_HISTONE_H3_ACETYLATION	0.0118919	0.0483145	0.431275	1.58625	32	40	SUPT3H,SAP130,TRIM16,YEATS2,TAF10,TADA2A,LEF1,KAT6A,BRCA2,KAT7,LDB1,MEAF6,MAP3K7,ING4	14	0.35	BRCA2,BRD1,BRPF1,BRPF3,CRTC2,DR1,ELP3,ELP4,EP300,ING4,ING5,IRF4,KAT2A,KAT2B,KAT6A,KAT6B,KAT7,LDB1,LEF1,MAP3K7,MBIP,MEAF6,MYOD1,POLE3,POLE4,SAP130,SPI1,SUPT3H,SUPT7L,TADA1,TADA2A,TADA3,TAF10,TAF12,TAF5L,TAF6L,TAF9,TRIM16,WDR5,YEATS2	Human
NCB-CB	_tstat	within each collection	BP: GO biological process	GO_REGULATION_OF_EPITHELIAL_TO_MESENCHYMAL_TRANSITION	0.00755235	0.0341122	0.395113	1.58685	21	60	SFRP1,VASN,AXIN2,HDAC2,CLASP1,LEF1,GLIPR2,ZNF703,TGFB2,EZH2,COL1A1,SMAD2,FOXA2,TWIST1,NOTCH1,PHLDB1,SNAI1,TGFBR1,MAD2L2,FOXA1,SMAD4,BAMBI,STRAP,CLASP2,OVOL2	25	0.416667	AGER,AXIN2,BAMBI,BCL9L,BMP2,BMP5,CLASP1,CLASP2,COL1A1,CRB2,CTNNB1,DAB2,DAB2IP,DACT3,DAG1,EFNA1,ELL3,EPB41L5,EPHA3,EZH2,FOXA1,FOXA2,FUZ,GCNT2,GLIPR2,GREM1,HDAC2,HPN,LEF1,MAD2L2,NOTCH1,OLFM1,OVOL2,PBLD,PHLDB1,PHLDB2,POFUT2,PPP2CA,SDCBP,SDHAF2,SFRP1,SFRP2,SMAD2,SMAD3,SMAD4,SMAD7,SNAI1,STRAP,TBX5,TCF7L2,TGFB1I1,TGFB2,TGFB3,TGFBR1,TGFBR2,TRIM62,TWIST1,VASN,WWTR1,ZNF703	Human
NCB-CB	_tstat	within each collection	BP: GO biological process	GO_G1_DNA_DAMAGE_CHECKPOINT	0.00718932	0.032932	0.387751	1.59181	20	68	CENPJ,PRKDC,E2F7,MDM4,CNOT3,TP63,CNOT7,TP73,SOX4,CDC25C,TFDP2,GTSE1,WAC,PRMT1,TNKS1BP1,MUC1,E2F1,CCND1,CCNB1,MDM2,BTG2,AURKA,CNOT2,CDK1,PCNA,PLK3,PLK2	27	0.397059	ARID3A,ATM,AURKA,BAX,BTG2,CARM1,CASP2,CCNB1,CCND1,CDC25C,CDK1,CDK2,CDKN1A,CDKN1B,CENPJ,CHEK2,CNOT1,CNOT10,CNOT2,CNOT3,CNOT4,CNOT6,CNOT6L,CNOT7,CNOT8,CRADD,DGKZ,E2F1,E2F4,E2F7,EP300,FBXO31,GADD45A,GIGYF2,GTSE1,MDM2,MDM4,MUC1,NPM1,PCBP4,PCNA,PLAGL1,PLK2,PLK3,PML,PPP2R5C,PRKDC,PRMT1,RBL2,RBM38,RFWD3,RPA2,RPS27A,RPS27L,SFN,SOX4,TFDP1,TFDP2,TNKS1BP1,TP53,TP63,TP73,TRIAP1,UBA52,UBB,UBC,WAC,ZNF385A	Human
NCB-CB	_tstat	within each collection	BP: GO biological process	GO_REGULATION_OF_TRANSMEMBRANE_RECEPTOR_PROTEIN_SERINE_THREONINE_KINASE_SIGNALING_PATHWAY	0.00123229	0.00847918	0.331303	1.59306	3	178	FBN2,LEMD3,DKK3,SOX11,SFRP1,VASN,WNT5A,LTBP1,UBE2O,DMRT1,ZNF451,FSTL3,GDF6,SNW1,PIN1,NPNT,CDKN1C,FGF9,ADAM17,ZNF423,BMP7,MECOM,MSX1,ABL1,TWSG1,ZNF703,SMURF2,ACVR2B,GLG1,TGFB2,FLCN,GDF5,INHBA,SMAD2,SOSTDC1,ACVR2A,STUB1,SYNJ2BP,NOTCH1,THBS1,SKI,TTK,SKIL,HES1,FST,TGFBR1,BMP1,MYOCD,BCL9,RNF165,TBX20,FKBP1A,SMAD4,ACVR1B,BAMBI,FOLR1,GDF15,GPC3,STRAP	59	0.331461	ABL1,ACVR1,ACVR1B,ACVR2A,ACVR2B,ACVRL1,ADAM17,ADAMTSL2,ASPN,BAMBI,BCL9,BCL9L,BMP1,BMP10,BMP2,BMP3,BMP4,BMP5,BMP6,BMP7,BMP8A,BMP8B,BMPER,BMPR1A,BMPR2,CAV1,CAV2,CD109,CDKN1C,CDKN2B,CHRD,CHRDL1,CHST11,CITED2,CRB2,CSNK2B,CTDSPL2,DAB2,DACT1,DACT2,DKK3,DMRT1,DNM2,EID2,ENG,FAM89B,FBN1,FBN2,FBXL15,FGF10,FGF9,FKBP1A,FKBP8,FLCN,FOLR1,FOXD1,FST,FSTL3,FURIN,FZD1,GATA4,GATA6,GDF10,GDF11,GDF15,GDF2,GDF5,GDF6,G…	Human
NCB-CB	_tstat	within each collection	BP: GO biological process	GO_REGULATION_OF_MICROTUBULE_POLYMERIZATION_OR_DEPOLYMERIZATION	0.000627	0.00533609	0.338098	1.59741	1	157	TPR,SPICE1,CHMP2A,TNKS,ZNF207,STMN1,NEK2,TBCD,ASPM,INPP5J,CLASP1,DLG1,GAS2L2,GPSM2,ARHGEF10,SPAG5,BIRC5,ABL1,CEP192,MAP6D1,CKAP5,EZR,AURKB,TERF1,CSNK1D,PRC1,CKAP2,RACGAP1,PIBF1,SKA3,FKBP4,TPX2,MYBL2,CHD4,KIFC1,PSRC1,KIF23,PLK1,MAP9,KATNB1,STMN2,NCOR1,CHMP1B,PPP2R1A,KIF4A,TTK,SKA1,CEP63,KIF11,NDC80,CHMP1A,CCNB1,ESPL1,MAPRE1,AURKA,SPAST,STIL,DYNC1H1,RGS2,RNF4,SPC25,DCTN2,CLASP2,HAUS3,CEP72,TUBG1,BI…	68	0.433121	ABL1,APC,APC2,ARHGEF10,ARHGEF2,ARL2,ASPM,AURKA,AURKB,BIRC2,BIRC3,BIRC5,BIRC7,BORA,CAV1,CCNB1,CDC14A,CDKN1B,CEP120,CEP192,CEP63,CEP72,CHD3,CHD4,CHEK2,CHMP1A,CHMP1B,CHMP2A,CHMP2B,CHMP3,CHMP4B,CHMP4C,CHMP5,CIB1,CKAP2,CKAP5,CLASP1,CLASP2,CLIP1,CLIP3,CSNK1D,DCTN2,DLG1,DYNC1H1,EML1,EML2,ESPL1,EZR,FBXO5,FES,FGF13,FKBP4,FLNA,GAS2L1,GAS2L2,GOLGA2,GPSM2,HAUS1,HAUS2,HAUS3,HAUS4,HAUS5,HAUS6,HAUS7,HAUS8,HDAC3…	Human
NCB-CB	_tstat	within each collection	BP: GO biological process	GO_EPITHELIAL_CELL_PROLIFERATION	0.00539629	0.0261302	0.377739	1.60185	15	81	NKX6-1,NCSTN,SOX9,PTCH1,WNT5A,IRF6,SDR16C5,DLG1,LOXL2,LGR5,PSEN1,TP63,COL8A1,NRARP,FOXN1,IGFBP5,EREG,ACVR2A,MMP14,MKI67,FAP,C6orf89,HMGB1,AREG,CCND1,MAP2K2,COL8A2,EHF,FERMT1,MED1,EPHA2	31	0.382716	ACVR2A,ACVRL1,ADK,APOA1,AREG,BAD,BAX,BCL2L2,BMP4,BMPER,BMPR2,BTBD10,BTRC,C6orf89,CCND1,CD34,CDH13,CEBPB,COL8A1,COL8A2,DLG1,EHF,EPHA2,EREG,ERN1,ESR1,ESR2,FAP,FERMT1,FGF10,FGFR2,FOXN1,HMGB1,HMOX1,HNF1B,ID2,IGFBP3,IGFBP4,IGFBP5,IL6,IRF6,ITGB1BP1,KIT,KLK8,LGR4,LGR5,LOXL2,MAP2K1,MAP2K2,MAPK1,MED1,MEF2C,MKI67,MMP14,MTSS1,NCSTN,NKX3-1,NKX6-1,NOX5,NRARP,PIK3CB,PPARD,PRKX,PROX1,PSEN1,PTCH1,RPS6KA1,SCARB1,…	Human
NCB-CB	_tstat	within each collection	BP: GO biological process	GO_NERVE_DEVELOPMENT	0.00788752	0.0353599	0.403069	1.60337	22	56	HOXB3,NPTX1,SIX4,PAX2,GABRB2,SEMA3F,GLI3,SIX1,LRIG2,HES1,PLXNA4,HOXB2,FBXO45,UNC13B,TBX1,SEMA3A,RNF165,LRIG1,PHOX2A,SLC1A3	20	0.357143	AFG3L2,ATP8B1,CHD7,COL25A1,CTNNB1,DAG1,DICER1,EGR2,EPHB1,EPHB2,ERBB3,FBXO45,GABRB2,GABRB3,GLI3,HES1,HOXA1,HOXA3,HOXB2,HOXB3,HOXD3,ILK,KCNA2,LPAR1,LRIG1,LRIG2,NAV2,NPTX1,NRP1,NRP2,NRTN,NTF4,NTRK1,PAX2,PHOX2A,PLXNA3,PLXNA4,PRKCG,PRX,RET,RNF165,SALL1,SEMA3A,SEMA3F,SERPINE2,SIX1,SIX4,SLC1A3,SLITRK6,SULF1,SULF2,TBX1,TFAP2A,TMEM126A,UNC13A,UNC13B	Human
NCB-CB	_tstat	within each collection	BP: GO biological process	GO_REGULATION_OF_CHROMOSOME_ORGANIZATION	0.000595	0.00532127	0.318951	1.60426	1	251	DHX36,TPR,CCT2,TNKS,ZNF207,TRIM28,AXIN2,CENPF,CSNK2A1,NEK2,ZNF451,SNW1,RNF20,SUPT6H,UHRF1,TADA2A,KDM5A,RPS6KA5,CCT6A,RTEL1,ATG5,TET1,ATR,SART3,KDM1A,JARID2,KDM3A,AUTS2,IWS1,AURKB,SLX4,TLK2,SFPQ,TERF1,FLCN,BUB1,DLGAP5,UBE2C,UBE2N,NOC2L,PTTG1,PPARGC1A,CTR9,MAPK15,AKAP8L,TWIST1,DNMT1,RUVBL2,PLK1,ZNF304,WBP2,DYNC1LI1,SET,C6orf89,SREBF1,RB1,ASF1A,SKI,TTK,CDC6,SETDB1,MCRS1,SPTY2D1,PIH1D1,WRAP53,MUC1,HN…	100	0.398406	ACD,AKAP8,AKAP8L,ANAPC10,ANAPC11,ANAPC4,APC,ARRB1,ASF1A,ATAD2,ATAD2B,ATG5,ATM,ATR,ATRX,AURKB,AUTS2,AXIN2,BCL6,BCOR,BECN1,BRCA1,BRD7,BUB1,BUB1B,BUB3,C6orf89,CAMK1,CAMK2D,CCNB1,CCT2,CCT3,CCT4,CCT5,CCT6A,CCT7,CCT8,CDC23,CDC26,CDC27,CDC45,CDC6,CDCA5,CDK9,CENPE,CENPF,CENPV,CHEK1,CHTOP,CSNK2A1,CSNK2A2,CTBP1,CTC1,CTCF,CTCFL,CTNNB1,CTR9,CUL3,DAXX,DHX36,DKC1,DLGAP5,DNMT1,DNMT3B,DPPA2,DUSP1,DYNC1LI1,EED,EI…	Human
NCB-CB	_tstat	within each collection	BP: GO biological process	GO_ENDOCRINE_SYSTEM_DEVELOPMENT	0.00400133	0.0206385	0.369801	1.61537	11	94	NKX6-1,HOXB3,DKK3,SOX9,WNT5A,RFX3,FSTL3,TBX19,FOXE1,CDKN1C,CDK6,GLI2,WNT4,SIX3,MDK,KDM1A,SOX4,PBX1,FOXA2,NF1,PAX8,STRA6,EIF2AK3,SIX1,SOX2,HES1,SMO,DLL1,TGFBR1,GATA2,TBX1,MAP2K2	32	0.340426	AKT1,ALDH1A2,ANXA1,APOA1,ARID5B,BAK1,BMP2,BMP4,BMP5,BMP6,BMPR1A,BRAF,CDH1,CDK6,CDKN1C,CITED2,CLU,CREB1,CRKL,CYP17A1,DKK3,DLL1,DRD2,DUOX2,EIF2AK3,ETS1,FGF10,FOXA2,FOXE1,FOXO1,FSTL3,GATA2,GATA3,GATA6,GIPR,GLI1,GLI2,HES1,HHEX,HNF1B,HOXA3,HOXA5,HOXB3,HOXD3,IL6,IL6R,INSR,KDM1A,MAP2K1,MAP2K2,MAPK1,MAPK3,MDK,MEN1,MNX1,NF1,NKX2-5,NKX6-1,NOG,ONECUT1,ONECUT2,PAX6,PAX8,PBX1,PDPK1,PITX1,PITX2,RAF1,RBPJ,RFX3,…	Human
NCB-CB	_tstat	within each collection	BP: GO biological process	GO_DEMETHYLATION	0.00953727	0.0407983	0.425303	1.61784	26	46	KDM5B,PPME1,KDM4D,KDM5A,TDG,TET1,KDM1A,KDM3A,TET2,KDM6B,JMJD1C,JMJD6,ALKBH2,ALKBH1,TET3	15	0.326087	ALKBH1,ALKBH2,ALKBH3,ALKBH4,ALKBH5,APEX1,APOBEC3A,APOBEC3C,APOBEC3F,ARID5B,CYP1A1,CYP1A2,CYP2C8,CYP2C9,CYP2D6,CYP3A4,CYP3A5,CYP51A1,FTO,HSF4,JMJD1C,JMJD6,KDM1A,KDM1B,KDM2A,KDM2B,KDM3A,KDM3B,KDM4A,KDM4B,KDM4C,KDM4D,KDM5A,KDM5B,KDM5C,KDM6A,KDM6B,PHF2,PHF8,POR,PPME1,TDG,TET1,TET2,TET3,UBE2B	Human
NCB-CB	_tstat	within each collection	BP: GO biological process	GO_NEGATIVE_REGULATION_OF_CELL_CYCLE_PROCESS	0.000304	0.00530695	0.332938	1.61933	0	193	TPR,SOX11,CENPJ,CHMP2A,TNKS,HMGA2,ZNF207,CDK5RAP2,CENPF,CSNK2A1,DMRT1,PRKDC,E2F7,MDM4,CNOT3,BMP7,TOM1L2,CCNK,TP63,MDM1,TMEM67,SUSD2,CNOT7,E2F8,BCL2,CLSPN,SMARCA4,AURKB,TP73,TERF1,BUB1,EZH2,SOX4,PTTG1,CDC25C,CDC73,TFDP2,OVOL1,PLK1,GTSE1,TRIM37,RB1,TTK,THOC5,PRMT1,TNKS1BP1,MUC1,CCNA2,PRMT2,E2F1,BRD4,BLM,PRKAR1A,RBM14,CCND1,CCNB1,ESPL1,ZNF655,MDM2,BTG2,AURKA,CNOT2,CDK1,ZNF830,BUB1B,MAD2L1,MAD2L2,FAN…	68	0.352332	APC,ARID3A,ATF5,ATM,ATRX,AURKA,AURKAIP1,AURKB,BAX,BCL2,BLM,BMP4,BMP7,BRCA1,BRD4,BRD7,BTG2,BUB1,BUB1B,BUB3,C10orf99,CARM1,CASP2,CAST,CCNA2,CCNB1,CCND1,CCNF,CCNK,CDC25C,CDC5L,CDC73,CDK1,CDK2,CDK4,CDK5RAP2,CDK5RAP3,CDK9,CDKN1A,CDKN1B,CDKN2B,CENPF,CENPJ,CHEK1,CHEK2,CHMP2A,CHMP4C,CLSPN,CNOT1,CNOT10,CNOT2,CNOT3,CNOT4,CNOT6,CNOT6L,CNOT7,CNOT8,CRADD,CSNK2A1,CSNK2A2,CTDSP1,CTDSP2,CTDSPL,DAB2IP,DACT1,DDX39…	Human
NCB-CB	_tstat	within each collection	BP: GO biological process	GO_POSITIVE_REGULATION_OF_KIDNEY_DEVELOPMENT	0.0100901	0.0424887	0.440453	1.62001	27	40	SOX9,PROM1,CD24,WNT4,SIX4,SERPINB7,LHX1,PAX2,MAGED1,PAX8,HOXB7,SIX1,SMO,VEGFA,PDGFD,PDGFB,LIF,PDGFA	18	0.45	ADIPOQ,AGT,AGTR2,BASP1,BMP4,C3AR1,CD24,EDNRA,EGR1,FOXD1,GATA3,GDNF,GREM1,HOXB7,LGR4,LHX1,LIF,LIN28A,MAGED1,MYC,NOG,PAX2,PAX8,PDGFA,PDGFB,PDGFD,PDGFRB,PROM1,RET,SERPINB7,SHH,SIX1,SIX4,SMO,SOX8,SOX9,VEGFA,WNT2B,WNT4,WT1	Human
NCB-CB	_tstat	within each collection	BP: GO biological process	GO_REGULATION_OF_CELL_CYCLE_PROCESS	0.000271	0.00530695	0.302346	1.62286	0	496	KCNH5,EDN3,RAB11FIP4,TPR,SPICE1,SOX9,SOX11,SFRP1,CENPJ,SOX15,CHMP2A,TNKS,HMGA2,ZNF207,WNT5A,AXIN2,CDK5RAP2,CENPF,NEK11,CSNK2A1,DMRT1,NEK2,PRKDC,E2F7,PLCB1,MDM4,PIN1,CDK13,ANLN,CNOT3,ADAM17,WNT4,SPAG5,BMP7,TOM1L2,KIF14,LEF1,RAD51B,CCP110,CCNK,ERCC3,L3MBTL1,MSX1,ATP2B4,BIRC5,SIX3,TP63,MDM1,ECT2,TMEM67,SUSD2,CNOT7,SENP2,E2F8,BCL2,IGF2,CLSPN,CDKN2A,SMARCA4,AURKB,TP73,CHORDC1,BRCA2,SFPQ,CUL7,TERF1,FLC…	197	0.397177	ADAM17,AIF1,AKT1,AKT2,ANAPC1,ANAPC10,ANAPC11,ANAPC16,ANAPC2,ANAPC4,ANAPC5,ANAPC7,ANKRD17,ANLN,ANXA1,APC,APEX1,APP,ARID3A,ATF5,ATM,ATP2B4,ATRX,AURKA,AURKAIP1,AURKB,AXIN2,BAX,BBS4,BCL2,BECN1,BID,BIN1,BIRC5,BIRC6,BLM,BMP4,BMP7,BORA,BRCA1,BRCA2,BRD4,BRD7,BTC,BTG2,BTRC,BUB1,BUB1B,BUB3,C10orf99,CALM1,CALM2,CALM3,CALR,CAMK2D,CARM1,CASP2,CAST,CAV2,CCDC8,CCNA2,CCNB1,CCNB3,CCND1,CCNF,CCNK,CCP110,CD28,CDC14…	Human
NCB-CB	_tstat	within each collection	BP: GO biological process	GO_DNA_REPAIR	0.000281	0.00530695	0.307786	1.62287	0	408	EYA4,REC8,ACTL6A,HMGA2,REV3L,EXD2,TRIM28,UBE2T,PRKDC,TAOK1,TOP3A,MCM8,POLI,RECQL5,CCNO,POLR2D,WDR33,EME1,FANCG,ZRANB3,POLR2H,KDM4D,UHRF1,POLM,LIG3,GPS1,DTL,TCEA1,EXO1,RAD51B,GINS4,TDG,RTEL1,ERCC3,ABL1,POLQ,SUPT16H,RPAIN,ATR,COPS3,BARD1,EYA1,VCP,MMS22L,RMI1,RFC3,CSNK1E,MCM9,UBE2V2,CLSPN,BRIP1,SLX4,TP73,BRCA2,SFPQ,TDP1,CSNK1D,TEX15,RAD51AP1,RUVBL1,RNASEH2A,POLD2,FANCF,TTC5,RFC4,UBE2V1,UBE2N,PTTG1,W…	169	0.414216	ABL1,ACTL6A,ACTR5,ACTR8,ALKBH1,ALKBH2,ALKBH3,APBB1,APEX1,APEX2,APLF,APTX,AQR,ASCC1,ASCC2,ASCC3,ASF1A,ASTE1,ATM,ATR,ATRIP,ATRX,ATXN3,BABAM1,BACH1,BARD1,BAZ1B,BCCIP,BLM,BRCA1,BRCA2,BRCC3,BRIP1,BTG2,CCDC155,CCNH,CCNO,CDC14B,CDC45,CDC5L,CDC7,CDCA5,CDK1,CDK2,CDK7,CDK9,CDKN2D,CEP164,CETN2,CHAF1A,CHAF1B,CHD1L,CHEK1,CHEK2,CHRNA4,CIB1,CINP,CLSPN,COPS2,COPS3,COPS4,COPS5,COPS6,COPS7A,COPS7B,COPS8,CRY2,CSNK1…	Human
NCB-CB	_tstat	within each collection	BP: GO biological process	GO_DNA_DEPENDENT_DNA_REPLICATION	0.00303132	0.0165596	0.377224	1.62294	8	88	REV3L,PRIM2,ZRANB3,GINS1,LIG3,GINS4,RTEL1,POLQ,RPAIN,MCM10,TOP2B,MMS22L,RFC3,TOP2A,BRCA2,RNASEH2A,POLD2,RFC4,FANCM,POLB,POLG2,POLE,POLD1,CDC6,MCM4,BLM,MCM2,ZNF830,LRWD1,CDC7,PCNA,CDK2AP1,PNKP,POLA1,WRN,MCM3,PARP2,LIG1	38	0.431818	ATRX,BAZ1A,BLM,BRCA2,CCNE1,CCNE2,CDC34,CDC45,CDC6,CDC7,CDK2AP1,CDK9,DNA2,DNAJA3,FANCM,FEN1,GINS1,GINS2,GINS3,GINS4,GMNC,HELB,HMGA1,LIG1,LIG3,LIG4,LRWD1,MCM10,MCM2,MCM3,MCM4,MCM5,MCM6,MCM7,MCMBP,MMS22L,ORC1,ORC2,ORC4,ORC5,PARP1,PARP2,PARP3,PCNA,PNKP,POLA1,POLA2,POLB,POLD1,POLD2,POLD3,POLD4,POLE,POLE2,POLG,POLG2,POLN,POLQ,PRIM1,PRIM2,PURA,RAD51,REV3L,RFC1,RFC2,RFC3,RFC4,RFC5,RNASEH1,RNASEH2A,RPA1,R…	Human
NCB-CB	_tstat	within each collection	BP: GO biological process	GO_ESTABLISHMENT_OF_CELL_POLARITY	0.00372755	0.0194434	0.381009	1.62568	10	84	LLGL1,GSK3B,FBF1,WNT5A,WNT7A,CDK5RAP2,KIF26B,CLASP1,CYP26B1,PTK7,BRSK1,GPSM2,SPAG5,FOXJ1,SPRY1,FSCN1,EYA1,UST,EZR,PRKCZ,LLGL2,NEK3,HES1,CYTH3,CENPA,NDC80,MARK2,FERMT1,NDEL1,ARHGEF11,BRSK2,JAM3,DYNLT1,NUMA1,PRKCI,NDE1,MPP5,SIPA1L3,WEE1,GBF1,PKD1,PARD3	42	0.5	AMOT,AMOTL1,ARF6,ARHGEF11,ARHGEF2,BRSK1,BRSK2,CCL19,CCL21,CCR7,CDK5RAP2,CENPA,CLASP1,CYP26B1,CYTH3,DOCK2,DOCK7,DYNLT1,EPHB1,EYA1,EZR,FBF1,FERMT1,FGF10,FGF13,FOXF1,FOXJ1,FRMD4A,FRMD4B,FSCN1,GBF1,GOLPH3,GPSM2,GSK3B,HES1,HTT,JAM3,KIF26B,LLGL1,LLGL2,MAP1B,MAP4,MARK2,MPP5,MPP7,MSN,MYH9,MYO18A,NDC80,NDE1,NDEL1,NEK3,NUMA1,PAFAH1B1,PARD3,PAX6,PKD1,PRKCI,PRKCZ,PTK2,PTK7,RAB10,RAB11FIP2,RAP2A,RICTOR,SCRIB,…	Human
NCB-CB	_tstat	within each collection	BP: GO biological process	GO_RNA_SECONDARY_STRUCTURE_UNWINDING	0.0115274	0.0471164	0.448541	1.62685	31	37	DHX36,DDX5,DDX27,EIF4A2,DDX47,DDX24,EIF4A3,DDX52,DDX56,EIF4A1,DDX31,DDX17,DDX1,DDX25,DDX42,DDX49,DDX18,DDX39A,DDX20,DDX23,DDX59,DDX46,DDX19A,DDX50,DDX21,DDX39B	26	0.702703	DDX1,DDX10,DDX17,DDX18,DDX19A,DDX19B,DDX20,DDX21,DDX23,DDX24,DDX25,DDX27,DDX28,DDX31,DDX39A,DDX39B,DDX3X,DDX41,DDX42,DDX43,DDX46,DDX47,DDX49,DDX5,DDX50,DDX51,DDX52,DDX53,DDX54,DDX55,DDX56,DDX59,DDX6,DHX36,EIF4A1,EIF4A2,EIF4A3	Human
NCB-CB	_tstat	within each collection	BP: GO biological process	GO_CEREBELLAR_CORTEX_DEVELOPMENT	0.00936937	0.040376	0.442605	1.62792	25	40	WNT7A,OGDH,GLI2,RERE,KIF14,MYH10,MDK,LHX1,EZH2,LDB1,SPTBN2,CEND1,NRXN1,SMO,DLL1,AGTPBP1,GRID2	17	0.425	AARS,AGTPBP1,AGTR2,ARCN1,ATP2B2,ATP7A,CACNA1A,CBLN1,CDK5,CEND1,CLP1,DLL1,EZH2,FAIM2,GLI1,GLI2,GRID2,HERC1,HSPA5,KIF14,KNDC1,LDB1,LHX1,MAP2K1,MDK,MTPN,MYH10,NAGLU,NRXN1,OGDH,PROX1,PTPN11,RERE,RORA,SERPINE2,SMO,SPTBN2,TRNP1,UQCRQ,WNT7A	Human
NCB-CB	_tstat	within each collection	BP: GO biological process	GO_REGULATION_OF_DNA_REPAIR	0.00478633	0.0237772	0.399131	1.63134	13	66	HMGA2,TRIM28,AXIN2,KDM4D,RTEL1,POLQ,KDM1A,EYA1,UBE2V2,TEX15,RAD51AP1,UBE2V1,UBE2N,TWIST1,FIGNL2,EGFR,EYA3,FOXM1,HMGB1,CBX8,RAD52,FIGNL1,RNF168,PCNA,APBB1,OTUB1,OGG1,SIRT6,RIF1,HELB,RPA2,BRCA1,SETMAR,FIGN,RNF8,H2AFX	36	0.545455	APBB1,APEX1,AXIN2,BABAM1,BRCA1,BRCC3,CBX8,CDK9,CEBPG,CHEK1,CUL4A,DEK,EGFR,ERCC8,EYA1,EYA3,FGF10,FIGN,FIGNL1,FIGNL2,FOXM1,H2AFX,HELB,HMGA2,HMGB1,KDM1A,KDM4D,MGMT,NPAS2,NUDT16,OGG1,OTUB1,PCNA,PML,POLH,POLQ,PPP4C,PPP4R2,PRKCG,RAD51,RAD51AP1,RAD52,RIF1,RNF168,RNF169,RNF8,RPA2,RPS3,RTEL1,SETMAR,SIRT1,SIRT6,TERF2,TERF2IP,TEX15,TFIP11,TMEM161A,TRIM28,TRIP12,TWIST1,UBE2N,UBE2V1,UBE2V2,UBR5,UIMC1,USP1	Human
NCB-CB	_tstat	within each collection	BP: GO biological process	GO_NEGATIVE_REGULATION_OF_CELLULAR_RESPONSE_TO_GROWTH_FACTOR_STIMULUS	0.00362199	0.0189847	0.367586	1.63173	10	103	FBN2,LEMD3,SFRP1,VASN,WNT5A,LTBP1,ZNF451,FSTL3,PIN1,ADAM17,WNT4,MECOM,SPRY1,ABL1,TWSG1,CASK,SLIT2,SMURF2,GPC1,GLG1,SMAD2,SOSTDC1,ADAMTS12,STUB1,NOTCH1,THBS1,SKI,SKIL	28	0.271845	ABL1,ADAM17,ADAMTS12,ADAMTSL2,AGT,AGTR2,ASPN,BAMBI,BCL9L,BMPER,CASK,CAV1,CAV2,CD109,CHRD,CHRDL1,CHST11,CTDSPL2,CXCL13,DAB2IP,DCN,DNM2,EID2,ENG,FAM89B,FBN1,FBN2,FSTL3,FUZ,FZD1,GATA3,GLG1,GPC1,GREM1,GREM2,HHEX,HIPK2,HRG,HSPA5,HTRA1,HTRA3,HTRA4,LEMD3,LTBP1,MECOM,MMRN2,MTMR4,NBL1,NEDD4,NOG,NOTCH1,ONECUT1,ONECUT2,PBLD,PDCD6,PDPK1,PEG10,PIN1,PMEPA1,PPM1A,PRDM16,PTPN1,RASL11B,RPS27A,SFRP1,SFRP2,SIRT1,SK…	Human
NCB-CB	_tstat	within each collection	BP: GO biological process	GO_GLYCOLIPID_BIOSYNTHETIC_PROCESS	0.0048226	0.023884	0.407041	1.63182	13	59	PIGS,PIGO,B3GNT5,PIGW,PGAP1,PIGG,ST8SIA2,DPM2,PIGM,PIGN,PIGT,PIGU,PIGQ,ST3GAL3,DPM3,PIGL,PIGC,GAL3ST3	18	0.305085	A4GALT,ALG5,B3GNT5,B4GALNT1,CWH43,DPM1,DPM2,DPM3,GAL3ST1,GAL3ST2,GAL3ST3,GAL3ST4,GBGT1,GPAA1,MPPE1,PGAP1,PGAP2,PGAP3,PIGA,PIGB,PIGC,PIGF,PIGG,PIGH,PIGK,PIGL,PIGM,PIGN,PIGO,PIGP,PIGQ,PIGS,PIGT,PIGU,PIGV,PIGW,PIGX,PIGZ,PLAUR,ST3GAL1,ST3GAL2,ST3GAL3,ST3GAL4,ST3GAL5,ST3GAL6,ST6GALNAC1,ST6GALNAC2,ST6GALNAC3,ST6GALNAC4,ST6GALNAC5,ST6GALNAC6,ST8SIA1,ST8SIA2,ST8SIA3,ST8SIA4,ST8SIA5,ST8SIA6,UGCG,UGT8	Human
NCB-CB	_tstat	within each collection	BP: GO biological process	GO_REGULATION_OF_ORGAN_MORPHOGENESIS	0.000597	0.00532127	0.328176	1.63325	1	228	NKD1,FZD2,FRS2,SOX9,SFRP1,NFIB,WNT5A,ARHGEF19,DVL3,CELSR3,AP2B1,BTBD7,ZNRF3,ETV5,PTK7,WNT4,BMP7,SIX4,DAAM1,WNT3A,MSX1,SPRY1,ABL1,VANGL2,DVL2,EYA1,BCL2,LHX1,PAX2,SMURF2,TGFB2,ROR2,HAND2,PSMD2,PSMC5,CLTC,PTN,DMRT3,TWIST1,PSMD14,MAGED1,FGFR1,PAX8,HOXB7,SIX1,SOX17,MESP1,RYK,NOTCH1,CELSR1,GRHL3,CTHRC1,PAX9,FZD3,WNT10A,ETV4,HES1,SMO,PSMF1,AHI1,NACA,EDN1,PSMC1,MLLT3,SIX2,TBX1,RAC1,PSMD6,SMAD4,RSPO3,MED1…	88	0.385965	ABL1,AGT,AGTR2,AHI1,ANKRD6,AP2A1,AP2A2,AP2B1,AP2M1,AP2S1,ARHGEF19,ARRB2,ASPN,B4GALT1,BASP1,BAX,BCL2,BCOR,BMP10,BMP2,BMP4,BMP7,BMPR1A,BTBD7,CARM1,CD34,CDC42,CELSR1,CELSR2,CELSR3,CHAD,CITED2,CLTC,CNTF,CPB2,CSF1,CTHRC1,CTNNB1,DAAM1,DAB2,DACT1,DMRT3,DVL1,DVL2,DVL3,EDN1,EDNRA,ESR1,ETV4,ETV5,EYA1,FBXW7,FGF1,FGF10,FGF7,FGFR1,FGFR2,FOXC1,FOXC2,FOXP2,FRS2,FZD1,FZD2,FZD3,FZD4,FZD5,FZD6,FZD7,GATA3,GDNF,GLI1…	Human
NCB-CB	_tstat	within each collection	BP: GO biological process	GO_MULTICELLULAR_ORGANISM_METABOLIC_PROCESS	0.00406366	0.0208601	0.387207	1.63424	11	79	COL4A5,COL7A1,COL4A6,COL6A5,ACACA,SERPINH1,COL2A1,COL11A1,CEL,COL4A2,ADAMTS3,COL8A1,COL10A1,COL4A1,COL5A1,COL6A6,COL1A1,PPARGC1A,MMP14,MMP16,MMP11,PRSS2,COL3A1,COL13A1,COL15A1,COL1A2,MC4R,ARG1,COL5A2,COL8A2,HIF1A,MMP7,ADAMTS2,MMP2,COL11A2	35	0.443038	ACACA,ACE,ACE2,ADAM15,ADAMTS14,ADAMTS2,ADAMTS3,ADRB1,ADRB2,AKR1C3,APOA4,ARG1,BMP8A,CEL,CLIC5,COL10A1,COL11A1,COL11A2,COL12A1,COL13A1,COL15A1,COL18A1,COL19A1,COL1A1,COL1A2,COL25A1,COL2A1,COL3A1,COL4A1,COL4A2,COL4A3,COL4A4,COL4A5,COL4A6,COL5A1,COL5A2,COL5A3,COL6A1,COL6A2,COL6A3,COL6A5,COL6A6,COL7A1,COL8A1,COL8A2,CTSB,CTSD,CTSK,CTSS,ENPEP,FURIN,GHR,HIF1A,ID1,KLK6,MC4R,MMP1,MMP10,MMP11,MMP12,MMP13,MM…	Human
NCB-CB	_tstat	within each collection	BP: GO biological process	GO_NEGATIVE_REGULATION_OF_MITOTIC_CELL_CYCLE	0.000615	0.00532127	0.34004	1.63637	1	179	TPR,CENPJ,TNKS,HMGA2,ZNF207,CENPF,NEK11,CSNK2A1,PRKDC,E2F7,MDM4,CNOT3,DLG1,BMP7,TOM1L2,ABL1,TP63,TOP2B,CNOT7,BCL2,CLSPN,TOP2A,SMARCA4,TP73,TERF1,BUB1,EZH2,WNT9A,SOX4,PTTG1,INTS3,CDC25C,CDC73,TFDP2,OVOL1,PLK1,GTSE1,XPC,RB1,TTK,PRMT1,FZD3,TNKS1BP1,MUC1,CCNA2,PRMT2,ANGEL2,E2F1,KNTC1,BLM,CCND1,CCNB1,PRCC,ZNF655,MDM2,BTG2,AURKA,CNOT2,CDK1,ZNF830,BUB1B,MAD2L1,MAD2L2,FANCI	64	0.357542	ABL1,ANGEL2,APC,ARID3A,ATF2,ATM,ATRX,AURKA,AURKAIP1,BAX,BCL2,BCL2L1,BLM,BMP4,BMP7,BRD7,BTG2,BTG3,BUB1,BUB1B,BUB3,CARM1,CASP2,CCNA2,CCNB1,CCND1,CDC25C,CDC73,CDK1,CDK2,CDK5RAP3,CDKN1A,CDKN1B,CDKN2B,CENPF,CENPJ,CHEK1,CHEK2,CHFR,CLSPN,CNOT1,CNOT10,CNOT2,CNOT3,CNOT4,CNOT6,CNOT6L,CNOT7,CNOT8,CRADD,CSNK2A1,CSNK2A2,CTDSP1,CTDSP2,CTDSPL,CTNNB1,DACT1,DGKZ,DLG1,E2F1,E2F4,E2F7,EP300,EZH2,FANCI,FBXO31,FBXO7,F…	Human
NCB-CB	_tstat	within each collection	BP: GO biological process	GO_POSITIVE_REGULATION_OF_OSSIFICATION	0.0034002	0.0182057	0.391134	1.63684	9	75	FBN2,PLA2G4A,NELL1,SOX11,WNT5A,GNAS,NPNT,OSR1,WNT4,BMP7,LTF,TP63,ACVR2B,TGFB2,GPM6B,ACVR2A,GLI3,BMPR1B,JUND,DLX5,CTHRC1	21	0.28	ACVR1,ACVR2A,ACVR2B,ADRB2,ANO6,ATP6AP1,BMP2,BMP4,BMP6,BMP7,BMPR1A,BMPR1B,BMPR2,CD276,CEBPA,CEBPB,CLIC1,CTHRC1,CTNNB1,CTNNBIP1,DDR2,DLX5,FAM20C,FBN2,GDF2,GJA1,GLI3,GNAS,GPM6B,HGF,ID4,IFITM1,IGF1,IL6,IL6R,IL6ST,ILK,JAG1,JUND,KL,LMNA,LTF,MEF2C,MSX2,NELL1,NIPBL,NPNT,OSR1,OSR2,P2RX7,PDLIM7,PKDCC,PLA2G4A,PRKD1,PTGER4,RUNX2,SFRP2,SLC8A1,SMAD1,SMAD3,SMAD5,SOX11,TACR1,TFAP2A,TGFB2,TGFB3,TMEM119,TOB2,TP63,…	Human
NCB-CB	_tstat	within each collection	BP: GO biological process	GO_REGULATION_OF_CARTILAGE_DEVELOPMENT	0.00656985	0.0307036	0.41566	1.63775	18	54	SOX9,WNT5A,AXIN2,SOX5,GDF6,GLI2,LOXL2,GLG1,TGFB2,GDF5,WNT9A,FGF18,GLI3,BMPR1B,ADAMTS12,TRPS1,TGFBR1,BMP1,SIX2	19	0.351852	ACVRL1,ADAMTS12,ADAMTS7,AXIN2,BMP1,BMP10,BMP2,BMP4,BMP6,BMPR1B,BMPR2,CARM1,CHADL,CTNNB1,EFEMP1,FGF18,FRZB,GDF2,GDF5,GDF6,GLG1,GLI2,GLI3,GREM1,HOXA11,IHH,LOXL2,MAF,NKX3-2,NOG,PKDCC,POR,PTHLH,RARA,RARB,RARG,RELA,RUNX2,SCIN,SHOX2,SIX2,SMAD1,SMAD3,SNAI2,SOX5,SOX6,SOX9,TGFB2,TGFBR1,TRPS1,WNT11,WNT5A,WNT9A,ZBTB16	Human
NCB-CB	_tstat	within each collection	BP: GO biological process	GO_REGULATION_OF_EPITHELIAL_CELL_PROLIFERATION	0.000297	0.00530695	0.325185	1.63857	0	257	KDM5B,CDH3,LAMC1,IFT80,FRS2,SOX9,SERPINB5,SOX11,SFRP1,SCN5A,NFIB,PTCH1,PTPRK,WNT5A,WNT7A,ERBB2,INTU,IFT122,IQGAP3,CDKN1C,OSR1,DLG1,CDK6,FGF9,RPTOR,SIX4,WNT3A,TP63,CASK,ZNF580,EYA1,IFT57,ZNF703,EFNB2,PAX2,NRARP,WFDC1,BRCA2,IFT52,TGFB2,RUNX3,JUN,GDF5,EREG,PTN,WDR48,PDCD10,HAS2,VASH2,CDC73,NF1,TWIST1,FGF18,NR4A1,MAGED1,EGFR,ZNF304,SIX1,DLX5,SYNJ2BP,NOTCH1,RB1,THBS1,IFT172,DLX6,SOX2,ETV4,HES1,SMO	69	0.268482	ACVRL1,AGER,AGGF1,AIMP1,AKT1,ALDH1A2,ANG,ANGPT1,APOE,APOH,ARG1,ARNT,ATF2,ATOH8,B4GALT1,BAD,BAX,BCL11B,BMP2,BMP4,BMP5,BMP6,BMPR1A,BMPR2,BRCA2,C5AR1,CASK,CAV1,CAV2,CCL11,CCL2,CCL24,CCL5,CCND1,CCR3,CD109,CDC42,CDC73,CDH13,CDH3,CDK6,CDKN1B,CDKN1C,CDKN2B,CPB2,CTNNB1,CXCL12,CXCR3,CYBA,CYP7B1,DAB2IP,DEAF1,DLG1,DLL4,DLX5,DLX6,EAF2,ECM1,EDNRA,EDNRB,EFNB2,EGFL7,EGFR,EGR3,ENG,EPB41L4B,ERBB2,EREG,ERRFI1,ESR1…	Human
NCB-CB	_tstat	within each collection	BP: GO biological process	GO_RECOMBINATIONAL_REPAIR	0.00376841	0.0195933	0.401557	1.64437	10	67	REC8,EXD2,MCM8,RECQL5,KDM4D,LIG3,RAD51B,GINS4,POLQ,MMS22L,MCM9,SLX4,BRCA2,SFPQ,RAD51AP1,UBE2N,WDR48,PSMD14,ZFYVE26,RAD54L,XRCC2,BLM,RBBP8,RAD51C,RAD52	25	0.373134	ATM,BLM,BRCA1,BRCA2,CCDC155,CDC45,CDC7,DMC1,ERCC4,EXD2,FAN1,FEN1,GEN1,GINS2,GINS4,H2AFX,HELQ,HUS1,INO80,KDM4D,LIG3,MCM8,MCM9,MMS22L,MORF4L1,NBN,NSMCE1,NSMCE2,PALB2,PARP1,POLN,POLQ,PSMD14,RAD50,RAD51,RAD51AP1,RAD51B,RAD51C,RAD51D,RAD52,RAD54B,RAD54L,RBBP8,REC8,RECQL,RECQL5,RNF138,RPA1,RPA2,RPA3,SFPQ,SFR1,SLX1A,SLX1B,SLX4,SMC5,SMC6,SWI5,TONSL,UBE2N,WDR48,XRCC1,XRCC2,XRCC3,YY1,ZFYVE26,ZSWIM7	Human
NCB-CB	_tstat	within each collection	BP: GO biological process	GO_REGULATION_OF_DNA_BINDING	0.00304981	0.0166325	0.385515	1.6449	8	84	SOX11,TNKS,NFIB,HMGA2,NEK2,HDAC2,LEF1,WNT3A,MSX1,KDM1A,ZFP90,HAND2,ZNF675,JUN,MDFI,HJURP,HABP4,TWIST1,ITGA2,SKI,HMGB1,HES1,SMO,CPNE1,RSF1,E2F1	26	0.309524	ACD,BCL3,CALM1,CALM2,CALM3,CEBPG,CPNE1,CSNK2B,CTNNB1,CTNNBIP1,DDIT3,DOT1L,E2F1,EDF1,EGF,EP300,ERCC2,GATA3,GZMA,HABP4,HAND2,HDAC2,HES1,HEY1,HEY2,HIPK2,HJURP,HMGA2,HMGB1,HMGB2,HMOX1,ID1,ID2,IFI16,IGF1,IRF4,ITGA2,JAK2,JUN,KAT2A,KDM1A,KLF4,LEF1,LHX2,LIF,MAD2L2,MDFI,MMP9,MSX1,MSX2,MYOCD,NEK2,NFIB,NFKBIA,NME1,NSD1,PARK7,PARP1,PER2,PINX1,PITX2,PLAUR,PPARA,RSF1,SIN3A,SIRT2,SKI,SMO,SOX11,SP100,SRI,SUMO1,T…	Human
NCB-CB	_tstat	within each collection	BP: GO biological process	GO_HINDBRAIN_MORPHOGENESIS	0.0100865	0.0424887	0.458983	1.64634	27	35	WNT7A,GLI2,KIF14,ABL1,LRP6,LHX1,LDB1,SPTBN2,CEND1,NRXN1,HES1,SMO,DLL1,AGTPBP1,DAB1,GRID2,ATP7A	17	0.485714	ABL1,AGTPBP1,ATP2B2,ATP7A,CACNA1A,CBLN1,CDK5,CEND1,DAB1,DLC1,DLL1,FAIM2,GLI1,GLI2,GNPAT,GRID2,HERC1,HES1,HSPA5,KIF14,KNDC1,LDB1,LHX1,LRP6,MAP2K1,MTPN,NRXN1,PROX1,PTPN11,RORA,SERPINE2,SMO,SPTBN2,TRNP1,WNT7A	Human
NCB-CB	_tstat	within each collection	BP: GO biological process	GO_ESTABLISHMENT_OR_MAINTENANCE_OF_BIPOLAR_CELL_POLARITY	0.00939986	0.0404244	0.465657	1.64741	25	33	WNT5A,PTK7,DLG1,FOXJ1,FSCN1,VANGL2,EYA1,EZR,DLG3,MARK2,DLG5,PRKCI,CLIC4,DLG4,WNT11,CRB2	16	0.484848	ANK1,ARF4,CDC42,CLIC4,CRB2,DLG1,DLG2,DLG3,DLG4,DLG5,EYA1,EZR,FOXF1,FOXJ1,FSCN1,ILK,LHX2,LIN7A,LIN7B,LIN7C,MARK2,MSN,OOEP,PDZD11,PRKCI,PTK7,RAP2A,SCRIB,SLC9A3R1,TCF15,VANGL2,WNT11,WNT5A	Human
NCB-CB	_tstat	within each collection	BP: GO biological process	GO_GLIOGENESIS	0.000635	0.00533609	0.352232	1.64829	1	146	NKX6-1,SOX9,SOX11,NFIB,MXRA8,ERBB2,EIF2B5,APCDD1,CDK6,HDAC11,ARHGEF10,LEF1,VIM,ABL1,PICK1,PAX2,SRGAP2,TRPC4,EPHA4,GPC1,TGFB2,KRAS,LAMA2,SOX4,CD9,MMP14,NF1,SOCS7,GLI3,POU3F1,NAB2,NOTCH1,ADAM22,SKI,VCAN,SOX2,MBOAT7,AREG,HES1,SMO,DLL1,FN1,DAB1,NDN,DISC1	45	0.308219	ABL1,ADAM22,AKT1,AKT2,ANXA1,APCDD1,AREG,ARHGEF10,BOK,CCL2,CCL3,CD9,CDH2,CDK5,CDK5R1,CDK6,CDKN2C,CLU,CNP,CNTF,CNTN2,CSK,CSPG4,CTNNB1,DAB1,DAB2IP,DAG1,DICER1,DISC1,DLL1,DNER,DRD1,DTX1,DUSP10,EEF2,EGR2,EIF2B1,EIF2B2,EIF2B3,EIF2B4,EIF2B5,EPHA4,ERBB2,ERBB3,ERCC2,FA2H,FGF10,FN1,GFAP,GLI3,GPC1,GSN,GSTP1,HDAC10,HDAC11,HES1,HEXB,HMBS,ID2,ID4,ILK,KCNJ10,KLF15,KRAS,LAMA2,LAMB1,LAMB2,LAMC3,LEF1,LGI4,LIF,LPAR…	Human
NCB-CB	_tstat	within each collection	BP: GO biological process	GO_POSITIVE_REGULATION_OF_CELL_CYCLE	0.000293	0.00530695	0.323195	1.64985	0	289	EDN3,RAB11FIP4,TPR,USP22,NELL1,CENPJ,SOX15,HMGA2,WNT5A,DMRT1,E2F7,PLCB1,MDM4,CCNL1,CNOT3,ADAM17,WNT4,KIF14,LEF1,RAD51B,CCNK,MSX1,BIRC5,ABL1,TP63,ECT2,CNOT7,E2F8,LRP6,IGF2,CDKN2A,AURKB,TP73,BRCA2,SFPQ,TGFB2,TERF1,TAS2R13,DLGAP5,UBE2C,EREG,RACGAP1,SOX4,PBX1,CDC25C,TFDP2,PSRC1,KIF23,OVOL1,PLK1,EGFR,FGFR1,GTSE1,DYNC1LI1,PLK4,FAP,C6orf89,RB1,CIT,CCNT2,HCFC1,CDC6,SMARCD3,PRMT1,HES1,TNKS1BP1,MUC1,E2F1,R…	111	0.384083	ABL1,ADAM17,AIF1,AKT1,ANAPC10,ANAPC11,ANKRD17,ANXA1,APEX1,APP,ARID3A,ASNS,ATM,ATRX,AURKA,AURKB,BAX,BCL2L11,BECN1,BIRC5,BRCA1,BRCA2,BRD4,BTC,BTG2,C6orf89,CALR,CARM1,CASP2,CAST,CCNB1,CCNC,CCND1,CCND2,CCND3,CCNH,CCNK,CCNL1,CCNL2,CCNT1,CCNT2,CCNY,CCPG1,CD28,CDC25B,CDC25C,CDC42,CDC45,CDC6,CDC7,CDCA5,CDK1,CDK10,CDK2,CDK4,CDK5R1,CDK9,CDKN1A,CDKN1B,CDKN2A,CENPJ,CENPV,CHEK2,CIT,CITED2,CNOT1,CNOT10,CNOT2,C…	Human
NCB-CB	_tstat	within each collection	BP: GO biological process	GO_GLAND_DEVELOPMENT	0.000285	0.00530695	0.317716	1.65425	0	350	CCDC39,KDM5B,HOXB3,DKK3,FRS2,SOX9,SERPINB5,IGSF3,POU2F1,SFRP1,NFIB,PTCH1,WNT5A,RB1CC1,IRF6,PRKDC,FSTL3,TBX19,E2F7,PIK3CA,PAM,SEC63,WLS,FOXE1,CDKN1C,CCKBR,TFCP2L1,GLI2,WNT4,BMP7,LEF1,SIX4,CCDC40,WNT3A,PSEN1,MSX1,SIX3,ABL1,TP63,CLCN2,TWSG1,MDK,KDM1A,JARID2,E2F8,DNAAF1,LAMA5,BCL2,ZNF703,TET2,EZR,BRCA2,ERBB4,TGFB2,FOXN1,NTN1,HAND2,IGFBP5,JUN,HOXB9,SMARCC1,PTN,SOSTDC1,FKBP4,PBX1,NF1,POLB,NRG3,CACNB4,I…	117	0.334286	AACS,ABL1,ACAT1,ADA,ADRB2,AFP,AK2,AK4,AKT1,AKT2,ALDH1A2,ALDH9A1,ALDOB,ALOX15B,ANXA1,APLN,APOA1,APRT,AR,AREG,ARF6,ARG1,ARHGAP5,ARID5B,ASNS,ASS1,ATP2B2,ATP7A,ATP7B,B4GALT1,BAAT,BCL11B,BCL2,BCL2L11,BDH1,BMP2,BMP4,BMP7,BMPR1A,BRAF,BRCA2,BTRC,CACNB4,CAD,CAPN1,CAST,CAV1,CBX7,CCDC39,CCDC40,CCKBR,CCL11,CCNB2,CCND1,CCNE1,CDC42,CDH1,CDKN1C,CDO1,CEBPA,CEBPB,CEBPG,CITED2,CLCN2,COBL,CP,CPB2,CPS1,CREB1,CRIP1,C…	Human
NCB-CB	_tstat	within each collection	BP: GO biological process	GO_POSITIVE_REGULATION_OF_BMP_SIGNALING_PATHWAY	0.00937613	0.040376	0.481518	1.65606	25	29	SOX11,UBE2O,ZNF423,MSX1,TWSG1,GDF5,SMAD2,NOTCH1,HES1,RNF165,SMAD4,GPC3	12	0.413793	ACVRL1,BMP4,BMPR2,CRB2,ENG,FBXL15,FKBP8,FOXD1,GATA4,GATA6,GDF2,GDF5,GPC3,HES1,ILK,KCP,MSX1,MSX2,NEO1,NOTCH1,RBPJ,RNF165,SMAD2,SMAD4,SOX11,SULF1,TWSG1,UBE2O,ZNF423	Human
NCB-CB	_tstat	within each collection	BP: GO biological process	GO_RNA_3_END_PROCESSING	0.00233411	0.0136997	0.379398	1.65729	6	94	CPSF6,POLR2D,LIN28B,WDR33,CDC40,CPSF3,CSTF3,U2AF2,RBM8A,NCBP2,ELAC2,SRSF2,NCBP1,ZC3H11A,CDC73,EIF4A3,ZNF473,SRSF3,RPS21,SRSF5,EXOSC3,THOC5,EXOSC6,PCF11,CPSF2,ERI1,SARNP,CHTOP,RNPS1,MTPAP,APP,ERI3,FBLL1,THOC6,SRSF1,SRSF6,CSTF2,SRSF4,CSTF1,SRRM1	40	0.425532	AHCYL1,APP,CASC3,CDC40,CDC73,CHTOP,CLP1,CPSF1,CPSF2,CPSF3,CPSF6,CPSF7,CSTF1,CSTF2,CSTF2T,CSTF3,DDX39A,DDX39B,DHX38,DKC1,EIF4A3,ELAC1,ELAC2,ERI1,ERI2,ERI3,EXOSC2,EXOSC3,EXOSC4,EXOSC5,EXOSC6,EXOSC7,EXOSC8,EXOSC9,FBL,FBLL1,FIP1L1,GRSF1,LEO1,LIN28A,LIN28B,LSM11,MAGOH,MTPAP,NCBP1,NCBP2,NUDT21,PABPC1,PABPC1L,PABPN1,PAF1,PAPOLA,PAPOLB,PAPOLG,PCF11,PNPT1,POLDIP3,POLR2D,PTCD1,RBM8A,RNPS1,RPS21,RPSA,SARNP,…	Human
NCB-CB	_tstat	within each collection	BP: GO biological process	GO_NEGATIVE_REGULATION_OF_CHROMOSOME_ORGANIZATION	0.00269724	0.0152498	0.384555	1.65789	7	89	TPR,TNKS,ZNF207,CENPF,CSNK2A1,ZNF451,SUPT6H,KDM5A,RTEL1,ATG5,TET1,KDM1A,JARID2,KDM3A,TERF1,BUB1,NOC2L,PTTG1,TWIST1,DNMT1,PLK1,SET,ASF1A,SKI,TTK,MCRS1,PIH1D1,HNRNPU,ESPL1,BUB1B,HNRNPC,MAD2L1,MAD2L2,HNRNPA1,OTUB1,CTBP1,XRCC5,KDM4A	38	0.426966	ACD,APC,ASF1A,ATAD2,ATAD2B,ATG5,ATM,ATRX,BCOR,BRCA1,BUB1,BUB1B,BUB3,CENPF,CSNK2A1,CSNK2A2,CTBP1,DNMT1,DNMT3B,ERCC1,ERCC4,ESPL1,FOXP3,GNL3L,H2AFY,HMGA1,HNRNPA1,HNRNPC,HNRNPU,JARID2,KDM1A,KDM3A,KDM4A,KDM5A,KLHL22,MAD1L1,MAD2L1,MAD2L2,MCRS1,MECP2,MTF2,NAT10,NBN,NOC2L,OTUB1,PARP1,PAX5,PHF1,PHF2,PHF8,PIF1,PIH1D1,PINX1,PLK1,PML,PSMG2,PTTG1,RAD50,RTEL1,SET,SETMAR,SIN3A,SIRT1,SKI,SMARCB1,SMG6,SNCA,SPI1,S…	Human
NCB-CB	_tstat	within each collection	BP: GO biological process	GO_GLIAL_CELL_DIFFERENTIATION	0.00163827	0.0105331	0.367723	1.65861	4	115	NKX6-1,SOX9,SOX11,NFIB,MXRA8,ERBB2,EIF2B5,CDK6,HDAC11,ARHGEF10,LEF1,VIM,ABL1,PICK1,PAX2,TRPC4,GPC1,KRAS,LAMA2,SOX4,CD9,NF1,GLI3,POU3F1,NAB2,NOTCH1,ADAM22,SKI,SOX2,HES1,SMO,DLL1	32	0.278261	ABL1,ADAM22,AKT1,AKT2,ARHGEF10,BOK,CD9,CDH2,CDK5,CDK6,CDKN2C,CLU,CNP,CNTF,CNTN2,CSK,CTNNB1,DAG1,DICER1,DLL1,DNER,DRD1,DTX1,DUSP10,EGR2,EIF2B1,EIF2B2,EIF2B3,EIF2B4,EIF2B5,ERBB2,ERBB3,ERCC2,FA2H,FGF10,GFAP,GLI3,GPC1,GSN,GSTP1,HDAC10,HDAC11,HES1,HMBS,ID2,ID4,ILK,KCNJ10,KLF15,KRAS,LAMA2,LAMB2,LAMC3,LEF1,LGI4,LIF,LPAR1,LYN,MAP2K1,MAPK1,MAPK3,MED12,METRN,MMP24,MPP5,MXRA8,NAB1,NAB2,NDRG1,NF1,NFIB,NKX6-1…	Human
NCB-CB	_tstat	within each collection	BP: GO biological process	GO_POSITIVE_REGULATION_OF_SYNAPSE_ASSEMBLY	0.00736584	0.0335509	0.432293	1.66147	20	48	NLGN1,CLSTN3,NRXN3,WNT7A,AMIGO3,LRRN1,LINGO2,THBS2,UBE2V2,FLRT3,AGRN,NRXN1,LRRC4B,ADNP,OXTR,EFNA5,BDNF,NLGN3,FLRT2,FLRT1,CLSTN2,SYNDIG1,CLSTN1	23	0.479167	ADNP,AGRN,AMIGO1,AMIGO2,AMIGO3,BDNF,BHLHB9,CBLN1,CLSTN1,CLSTN2,CLSTN3,CUX2,EEF2K,EFNA5,EPHB1,EPHB2,EPHB3,FLRT1,FLRT2,FLRT3,LINGO2,LRRC24,LRRC4B,LRRN1,LRRN3,LRRTM1,LRRTM2,MECP2,NLGN1,NLGN2,NLGN3,NRXN1,NRXN3,NTRK1,NTRK2,NTRK3,OXTR,SLITRK2,SLITRK3,SLITRK4,SLITRK5,SLITRK6,SRPX2,SYNDIG1,THBS2,TPBG,UBE2V2,WNT7A	Human
NCB-CB	_tstat	within each collection	BP: GO biological process	GO_DNA_TEMPLATED_TRANSCRIPTION_TERMINATION	0.00167001	0.0106947	0.378488	1.66255	4	97	CDC40,POLR2H,TTF1,XRN2,CPSF3,CSTF3,U2AF2,ERCC3,POLR1B,RBM8A,NCBP2,SRSF2,TAF1B,SNRPB,TAF1D,NCBP1,ZC3H11A,SNRPE,EIF4A3,ZNF473,SRSF3,SRSF5,MNAT1,TTF2,TAF1A,THOC5,GTF2H1,PCF11,CPSF2,SARNP,CHTOP,SMN2,RNPS1,PRMT5,POLR1D,POLR1A,SETX,THOC6,SRSF1,SRSF6,CSTF2,SRSF4,CSTF1,POLR2A,SRRM1	45	0.463918	CASC3,CCNH,CD3EAP,CDC40,CDK7,CHTOP,CLP1,CPSF1,CPSF2,CPSF3,CPSF7,CSTF1,CSTF2,CSTF3,DDX39A,DDX39B,DHX38,EIF4A3,ERCC2,ERCC3,FIP1L1,GTF2H1,GTF2H2,GTF2H3,GTF2H4,GTF2H5,LSM10,LSM11,MAGOH,MAZ,MED18,MNAT1,NCBP1,NCBP2,NUDT21,PABPN1,PAPOLA,PCF11,POLDIP3,POLR1A,POLR1B,POLR1C,POLR1D,POLR1E,POLR2A,POLR2E,POLR2F,POLR2H,POLR2K,POLR2L,POLR3K,PRMT5,RBM8A,RNPS1,SARNP,SETX,SLBP,SLU7,SMN1,SMN2,SNRPB,SNRPD3,SNRPE,SNR…	Human
NCB-CB	_tstat	within each collection	BP: GO biological process	GO_REGULATION_OF_SYNAPSE_ASSEMBLY	0.0037918	0.0196833	0.413195	1.66377	10	61	NLGN1,CLSTN3,NRXN3,WNT5A,WNT7A,AMIGO3,LRRN1,LINGO2,ROBO2,SIX4,THBS2,EPHA7,UBE2V2,SLIT1,FLRT3,AGRN,SIX1,NRXN1,LRRC4B,ADNP,OXTR,EFNA5	22	0.360656	ADNP,AGRN,AMIGO1,AMIGO2,AMIGO3,BDNF,BHLHB9,CBLN1,CLSTN1,CLSTN2,CLSTN3,COLQ,CUX2,EEF2K,EFNA5,EPHA7,EPHB1,EPHB2,EPHB3,FLRT1,FLRT2,FLRT3,LINGO2,LRRC24,LRRC4B,LRRN1,LRRN3,LRRTM1,LRRTM2,MECP2,MEF2C,MUSK,NLGN1,NLGN2,NLGN3,NRXN1,NRXN3,NTRK1,NTRK2,NTRK3,OXTR,PDLIM5,PPP1R9A,PTK2,RAB17,ROBO2,SIX1,SIX4,SLIT1,SLITRK2,SLITRK3,SLITRK4,SLITRK5,SLITRK6,SRPX2,SYNDIG1,THBS2,TPBG,UBE2V2,WNT5A,WNT7A	Human
NCB-CB	_tstat	within each collection	BP: GO biological process	GO_POSITIVE_REGULATION_OF_OSTEOBLAST_DIFFERENTIATION	0.00411523	0.0210913	0.418259	1.66379	11	56	FBN2,NELL1,SOX11,GNAS,NPNT,WNT4,BMP7,LTF,TP63,ACVR2B,ACVR2A,GLI3,BMPR1B,JUND,DLX5,CTHRC1	16	0.285714	ACVR1,ACVR2A,ACVR2B,ATP6AP1,BMP2,BMP4,BMP6,BMP7,BMPR1A,BMPR1B,BMPR2,CD276,CEBPA,CEBPB,CLIC1,CTHRC1,CTNNB1,CTNNBIP1,DDR2,DLX5,FAM20C,FBN2,GDF2,GJA1,GLI3,GNAS,HGF,ID4,IFITM1,IGF1,IL6,IL6R,IL6ST,ILK,JAG1,JUND,LMNA,LTF,MEF2C,MSX2,NELL1,NPNT,PDLIM7,PRKD1,PTGER4,RUNX2,SFRP2,SMAD1,SMAD5,SOX11,TMEM119,TP63,WNT10B,WNT4,WNT7B,ZHX3	Human
NCB-CB	_tstat	within each collection	BP: GO biological process	GO_RESPONSE_TO_FIBROBLAST_GROWTH_FACTOR	0.00198807	0.012131	0.376389	1.66543	5	101	KDM5B,FRS2,SFRP1,FGF12,FGFR3,GTF2F1,POLR2D,POLR2H,FGF19,FGFRL1,FGF9,NCBP2,FGFBP1,HNRNPM,LHX1,GALNT3,NCBP1,TRIM71,COL1A1,FLRT3,FGF18,ESRP1,NR4A1,FGFR1,TIA1,HNRNPH1,KCNC1,TBX1,RBFOX2,HNRNPA1,SETX,HYAL2,DSTYK,FLRT2,POLR2G,FLRT1,KIF16B,POSTN,POLR2A,ESRP2,FGFR2	41	0.405941	CBL,CCL2,CCL5,CD44,CDC5L,CEP57,COL1A1,CPS1,CTNNB1,CXCL13,DLL4,DSTYK,EGR3,ELK1,ESRP1,ESRP2,FGF1,FGF10,FGF12,FGF14,FGF17,FGF18,FGF19,FGF2,FGF7,FGF9,FGFBP1,FGFR1,FGFR2,FGFR3,FGFR4,FGFRL1,FIBP,FLRT1,FLRT2,FLRT3,FRS2,FRS3,GALNT3,GRB2,GTF2F1,GTF2F2,HNRNPA1,HNRNPF,HNRNPH1,HNRNPM,HYAL1,HYAL2,IER2,IQGAP1,ITGB1BP1,KCNC1,KDM5B,KIF16B,KL,KLB,LHX1,MAPK1,MAPK3,NCBP1,NCBP2,NDST1,NOG,NR4A1,POLR2A,POLR2B,POLR2C,P…	Human
NCB-CB	_tstat	within each collection	BP: GO biological process	GO_PHOTORECEPTOR_CELL_DIFFERENTIATION	0.00865177	0.0379645	0.457036	1.66543	23	38	NKD1,SOX9,PROM1,RP1,CRB1,PTN,PPP2R3A,IFT20,NPHP4,SDK2,IFT140,AGTPBP1,AHI1,FSCN2,TOPORS,VEGFA,PRKCI,CEP290,ARL3	19	0.5	AGTPBP1,AHI1,ARL3,BBS4,CABP4,CCDC66,CEP290,CNGB1,CRB1,DSCAM,FSCN2,IFT140,IFT20,MYO7A,NAGLU,NKD1,NPHP4,NR2E3,NRL,NTRK2,OLFM3,PAX6,PPP2R3A,PRDM1,PRKCI,PROM1,PTN,RDH13,ROM1,RORB,RP1,SDK2,SOX8,SOX9,STAT3,THY1,TOPORS,VEGFA	Human
NCB-CB	_tstat	within each collection	BP: GO biological process	GO_POSITIVE_REGULATION_OF_CELL_CYCLE_PROCESS	0.000303	0.00530695	0.338674	1.6679	0	213	EDN3,RAB11FIP4,TPR,CENPJ,SOX15,HMGA2,WNT5A,DMRT1,E2F7,PLCB1,MDM4,CNOT3,WNT4,KIF14,LEF1,RAD51B,MSX1,BIRC5,TP63,ECT2,CNOT7,E2F8,IGF2,CDKN2A,AURKB,TP73,SFPQ,TERF1,TAS2R13,DLGAP5,UBE2C,EREG,RACGAP1,SOX4,PBX1,CDC25C,TFDP2,KIF23,PLK1,GTSE1,DYNC1LI1,PLK4,FAP,RB1,CIT,CDC6,SMARCD3,PRMT1,TNKS1BP1,MUC1,E2F1,RCC2,MYBBP1A,BRD4,CDK10,RAD51C,CCND1,EDN1,CCNB1,ESPL1,MDM2,BTG2,AURKA,SPAST,CNOT2,MED25,CDK1,MAD2L1,C…	88	0.413146	AIF1,ANAPC10,ANAPC11,ANKRD17,ANXA1,APEX1,APP,ARID3A,ATM,ATRX,AURKA,AURKB,BAX,BECN1,BIRC5,BRCA1,BRD4,BTC,BTG2,CARM1,CASP2,CCNB1,CCND1,CD28,CDC25B,CDC25C,CDC42,CDC45,CDC6,CDC7,CDCA5,CDK1,CDK10,CDK2,CDK4,CDK5R1,CDKN1A,CDKN1B,CDKN2A,CENPJ,CENPV,CHEK2,CIT,CNOT1,CNOT10,CNOT2,CNOT3,CNOT4,CNOT6,CNOT6L,CNOT7,CNOT8,CRADD,CREBBP,CRLF3,CSPP1,CUL3,CUL4A,CUL4B,CXCR5,CYP1A1,DAB2IP,DBF4B,DDX3X,DLGAP5,DMRT1,DRD2,…	Human
NCB-CB	_tstat	within each collection	BP: GO biological process	GO_RNA_LOCALIZATION	0.00031	0.00530695	0.349291	1.66817	0	170	TPR,CCT2,TNKS,HNRNPA3,POLR2D,SUPT6H,CDC40,NUP107,TSC1,CPSF3,U2AF2,SMG7,IGF2BP3,NOL6,ATR,RBM8A,NCBP2,SENP2,SRSF2,IWS1,CKAP5,NCBP1,RAE1,HNRNPA2B1,NUP160,ZC3H11A,NXT1,KHSRP,NUP214,EIF4A3,IGF2BP2,RPS28,SRSF3,EXOSC10,SRSF5,NUP188,EXOSC3,XPO7,NUP35,THOC5,PIH1D1,WRAP53,SEH1L,ATXN2,NUP85,RBFOX1,PRPF31,CPSF2,SARNP,PARP11,PRPF18,DDX25,CHTOP,RNPS1,KIF5C,EIF5A2,XPO1,HNRNPA1,SRSF10,HNRNPA1L2,THOC6,SRSF1,SRSF6…	83	0.488235	AAAS,AGFG1,AHCTF1,ALKBH5,ATM,ATR,ATXN2,BICD1,BUD13,CASC3,CCT2,CCT4,CDC40,CHTOP,CKAP5,CPEB1,CPSF1,CPSF2,CPSF3,DDX19A,DDX19B,DDX25,DDX39A,DDX39B,DHX38,EIF4A3,EIF4E,EIF5A,EIF5A2,ENY2,EXOSC10,EXOSC2,EXOSC3,FBL,FIP1L1,FLOT1,FMR1,FYTTD1,G3BP2,GLE1,HHEX,HNRNPA1,HNRNPA1L2,HNRNPA2B1,HNRNPA3,HTT,IGF2BP1,IGF2BP2,IGF2BP3,IWS1,KHSRP,KIF5C,LRPPRC,MAGOH,MAGOHB,MCM3AP,MEX3D,MRPL18,MVP,MX2,MYO1C,NCBP1,NCBP2,NOL6,…	Human
[truncated: 287 more rows]

## Sheet: Table S3
Supplmentary Table 3. GSEA analysis of NCB vs CB in D+C arm
contrast	geneScore	fdr_correction_mode	collection	pathway	pval	padj	ES	NES	nMoreExtreme	size	leadingEdge	size_leadingEdge	fraction_leadingEdge	inPathway	species
[truncated: 568 more rows]

## Sheet: Table S4
Supplmentary Table 4. Differential gene expression analysis of pretreatment samples of NCB vs CB in D+O+C arm
Gene	NCB-CB_logFC	NCB-CB_pval	NCB-CB_adjpval	p107	p109	p123	p124	p133	p135	p140	p144	p146	p150	p154	p155	p161	p162	p173	p178	p179	p182	p196	p199	p200	p202	p208	p213	p216	p223	p226	p229	p230	p231	p233
[truncated: 427 more rows]

## Sheet: Table S5
Supplmentary Table 5. RNAseq of pretreatment samples of NCB vs CB in D+C arm
[truncated: 576 more rows]

## Sheet: Table S6
Supplmentary Table 6. GSEA analysis of NCB vs exceptional responders in D+O+C arm
[truncated: 25 more rows]

[truncated: 13 more sheets: Table S7, Table S8, Table S9 , Table S10, Table S11, Table S12, Table S13 , Table S14 , Table S15 , Table S16, Table S17, Table S18, Table S19]
